# Supplementary material
Source: publisher figshare collection journal article supplement (https://brill.figshare.com/articles/dataset/_/1558254)

# Evolution and role of the follicular epidermal gland system in non-ophidian squamates

Christopher Mayerl<sup>1,\*</sup>, Simon Baeckens<sup>2,\*</sup>, Raoul Van Damme<sup>2</sup>

1 - Clemson University, 132 Long Hall, Department of Biological Sciences, Clemson SC,  
29634, USA

2 - University of Antwerp, Laboratory of Functional Morphology, Universiteitsplein 1 - C,  
2610 Wilrijk, Belgium

\* These authors contributed equally to the work

**Supplementary Figure S1**

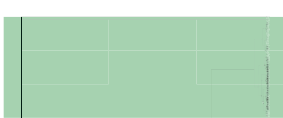

A

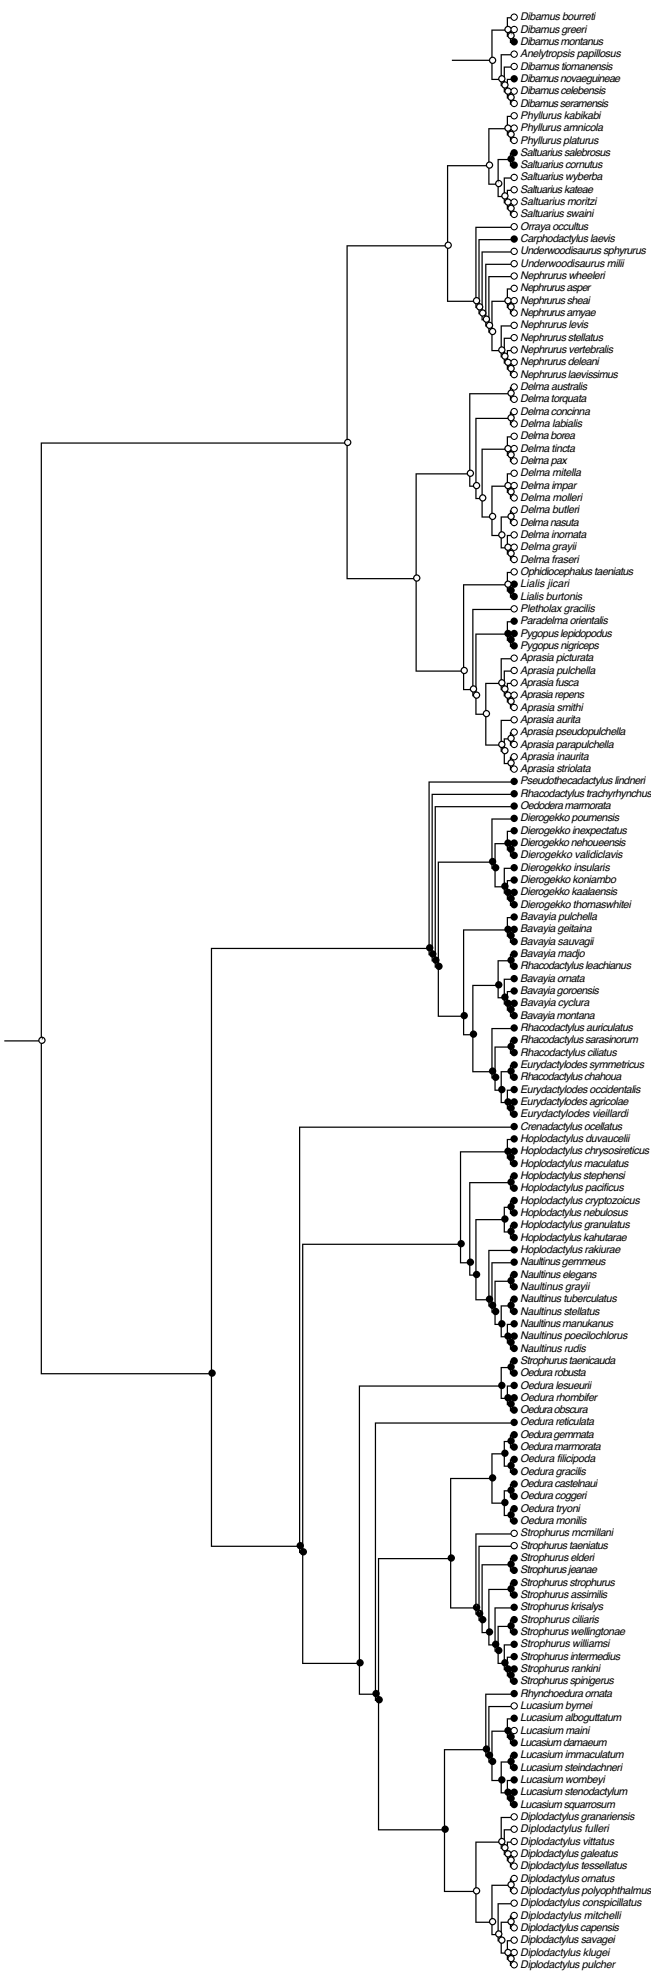

Dibamidae

Carphodactylidae

Pygopodidae

Diplodactylidae

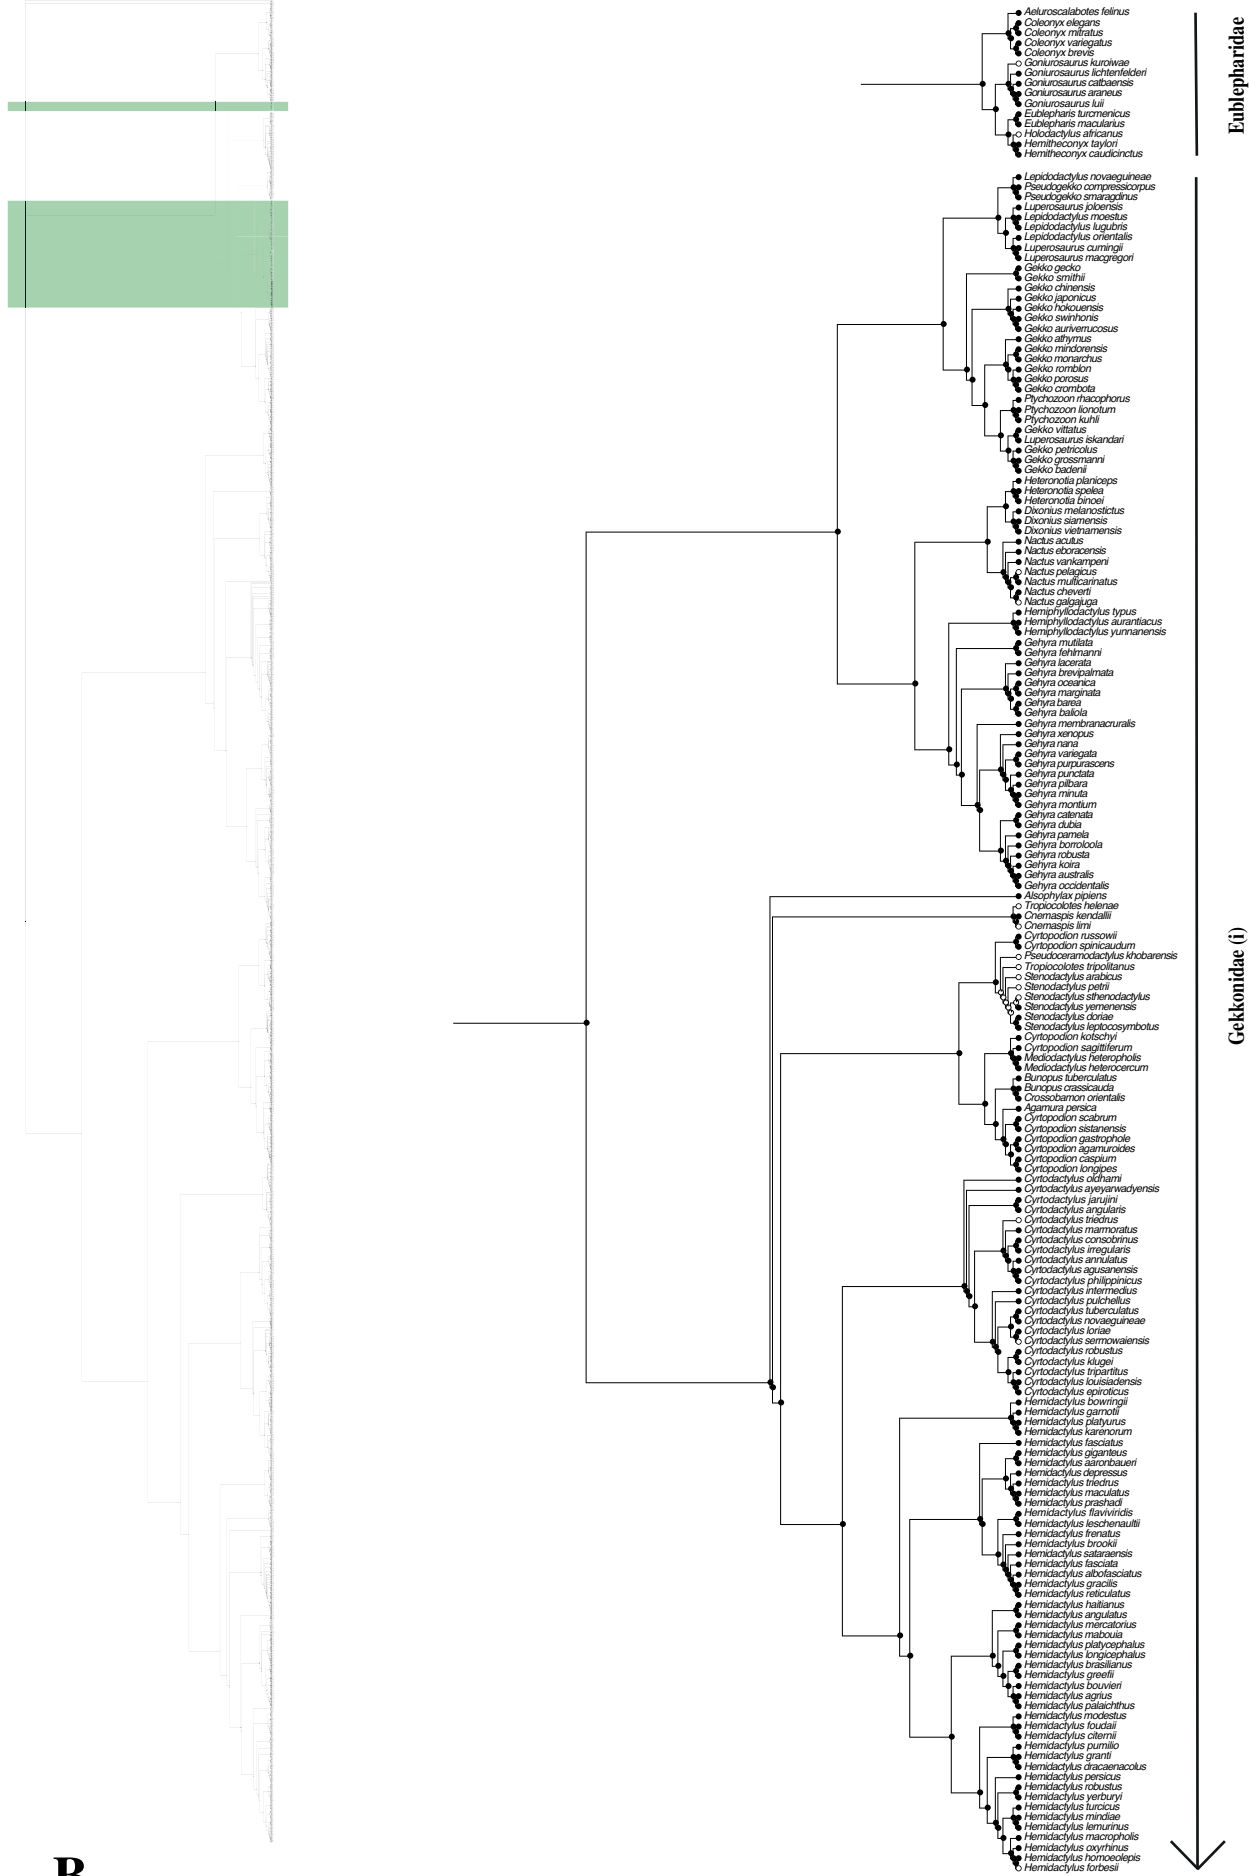

B

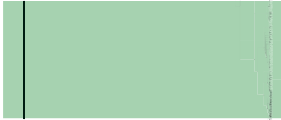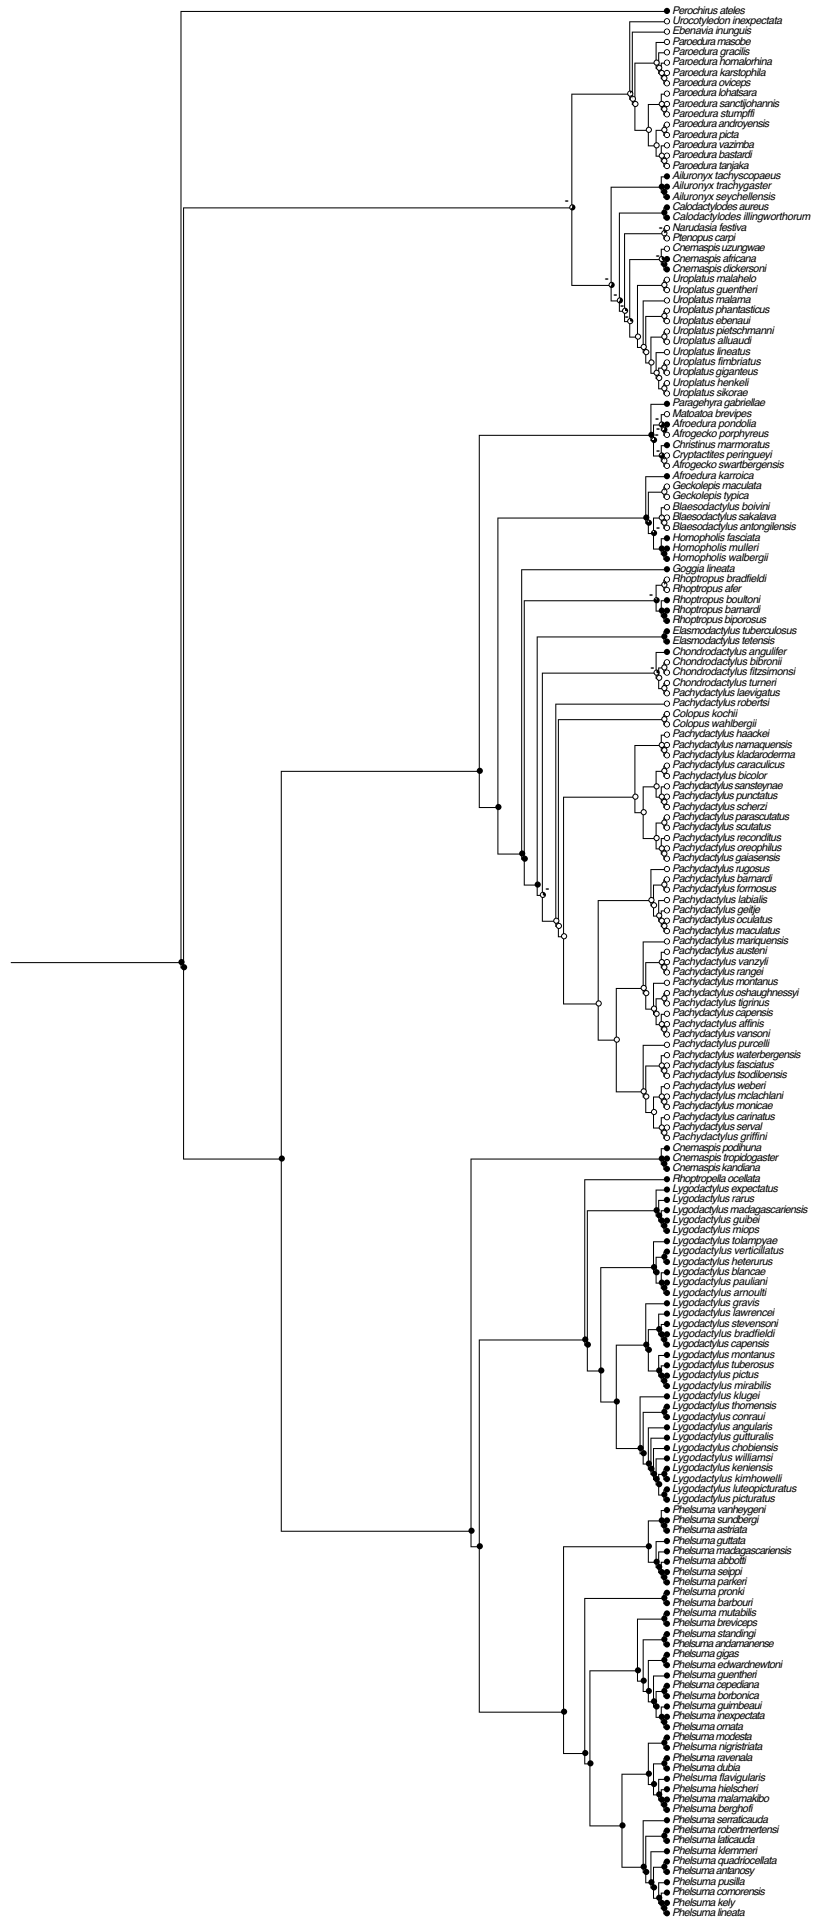

Gekkonidae (ii)

C

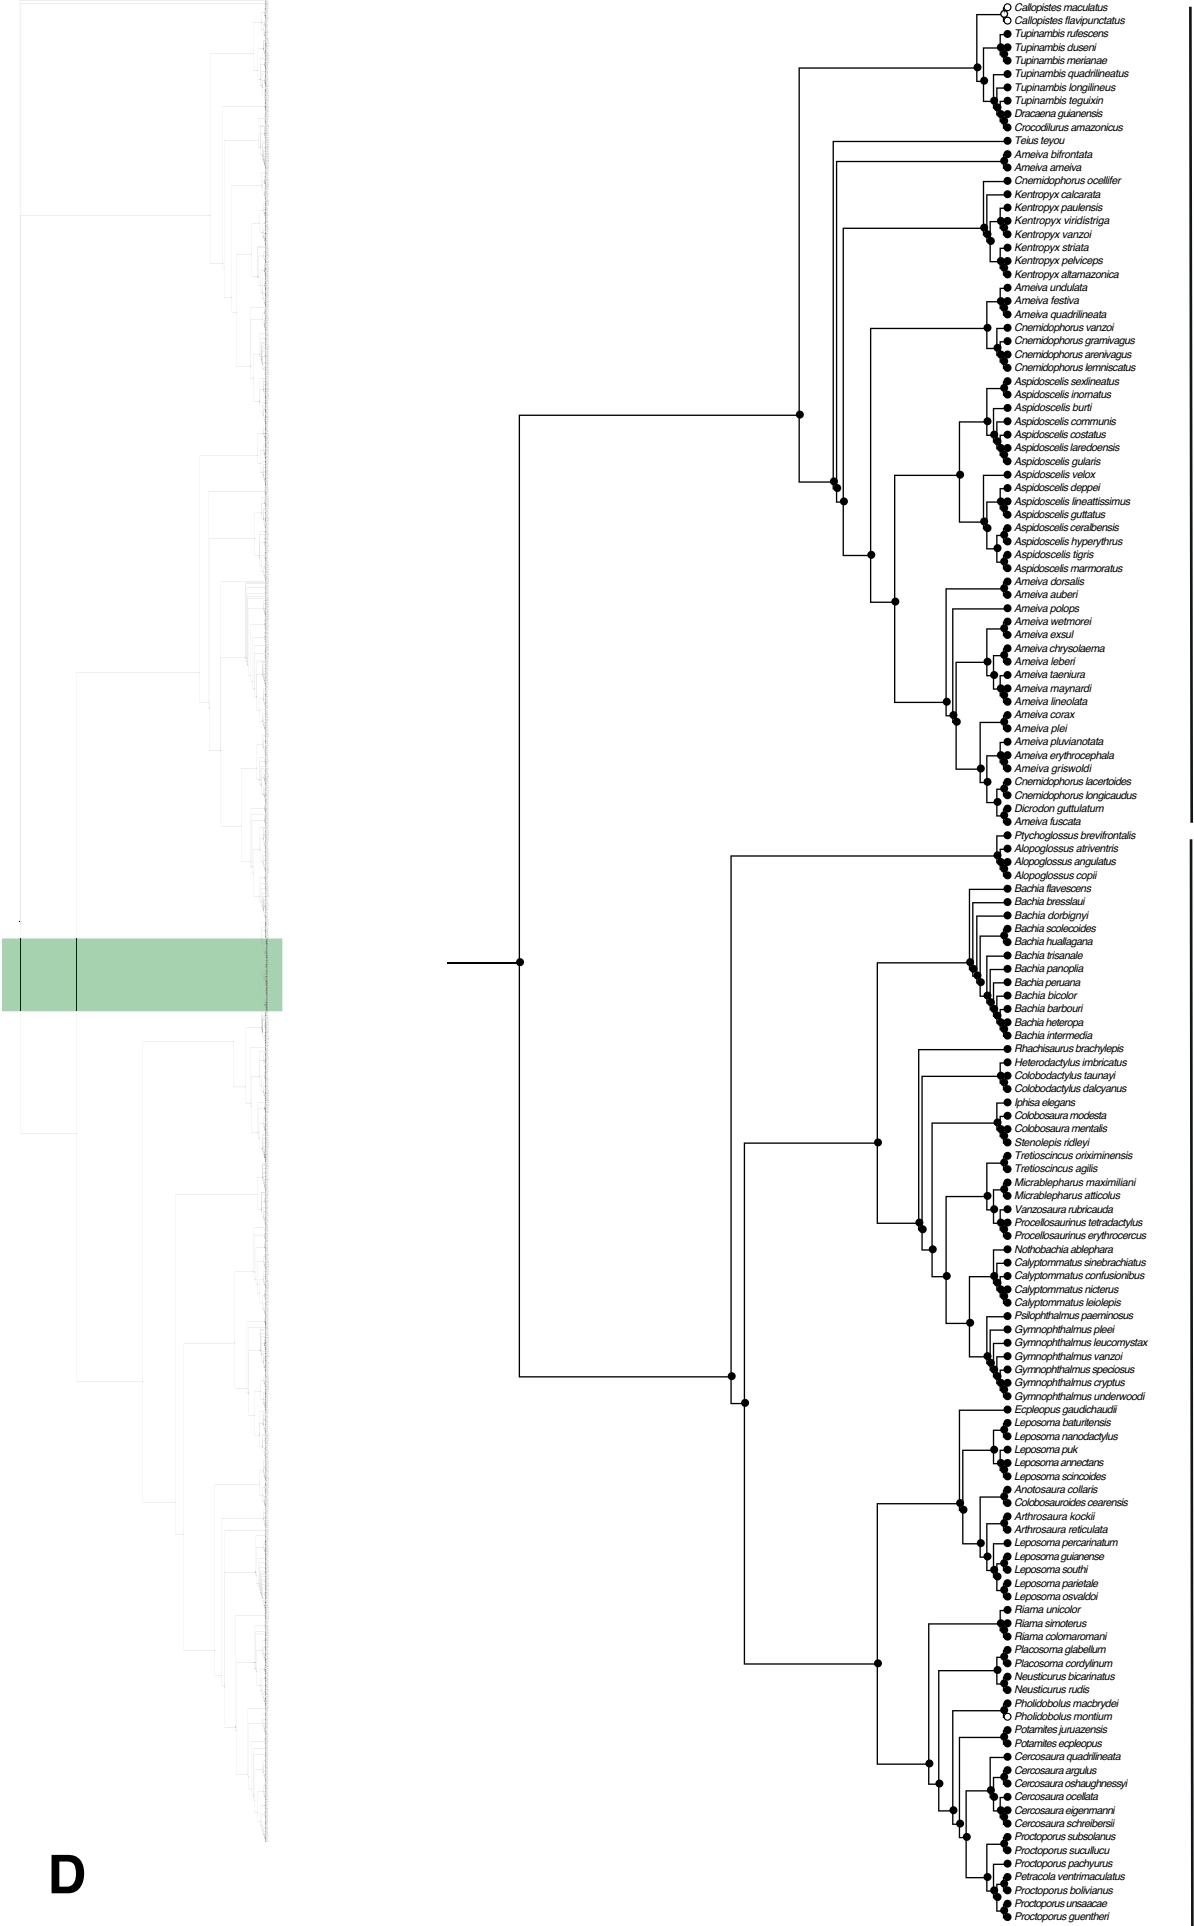

D

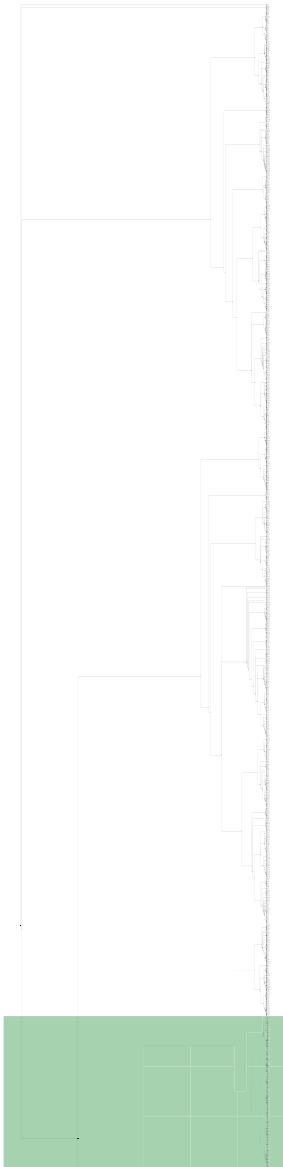

E

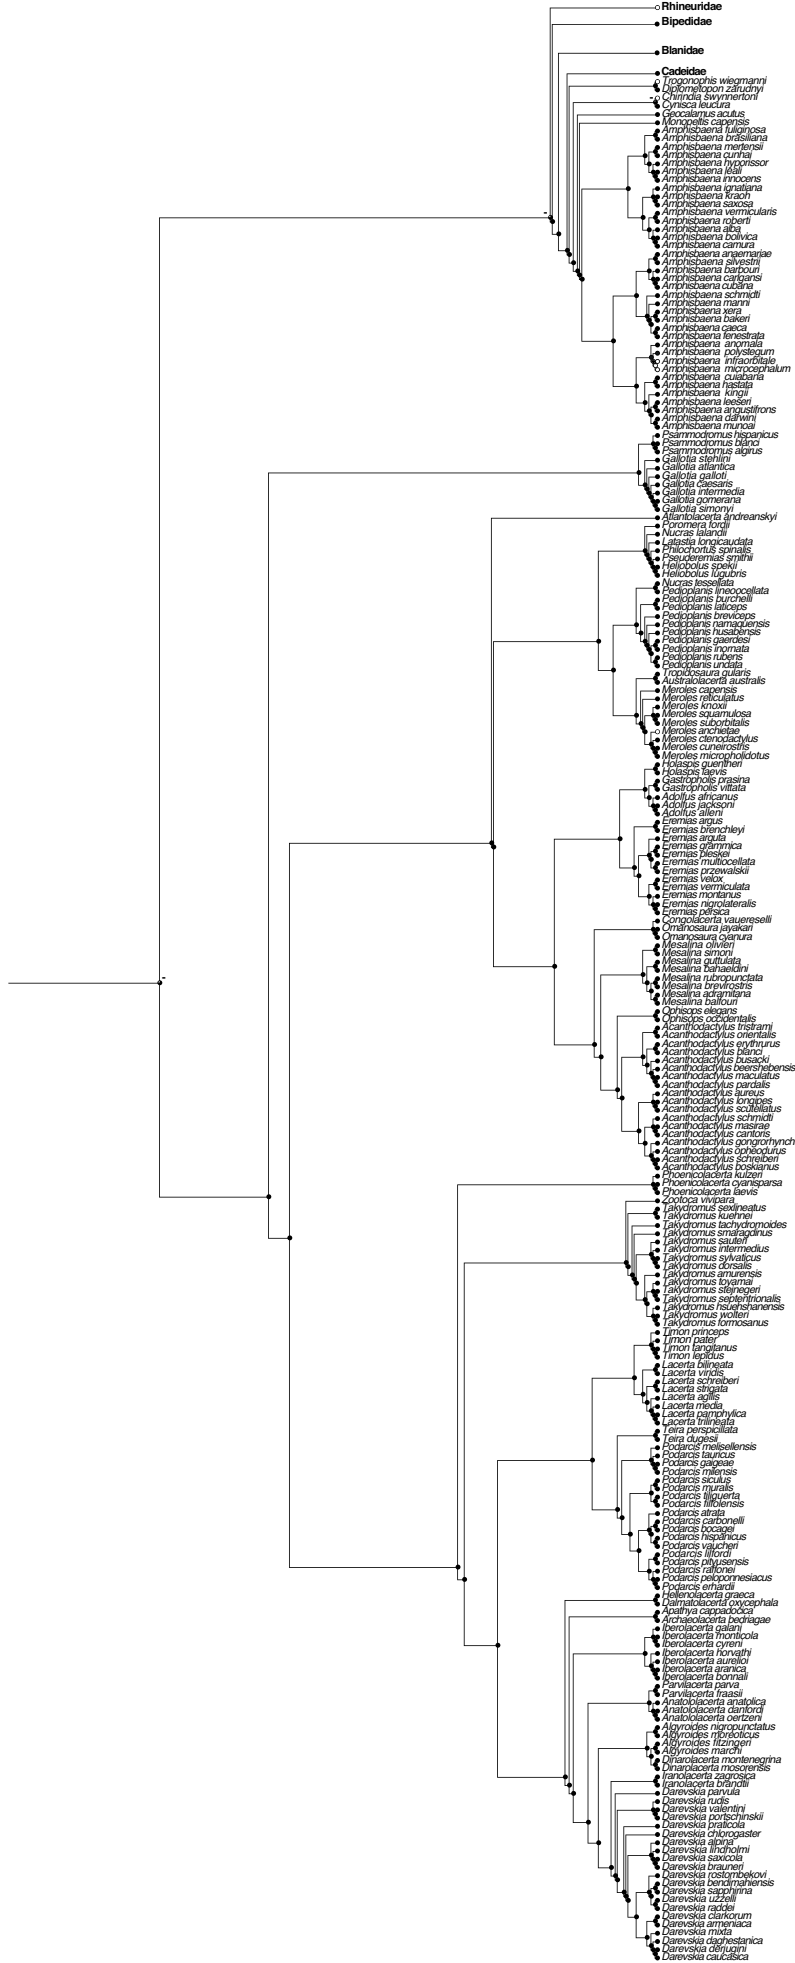

Trogonophiidae

Amphisbaenidae

Lacertidae

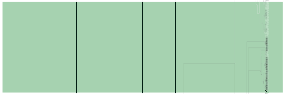

F

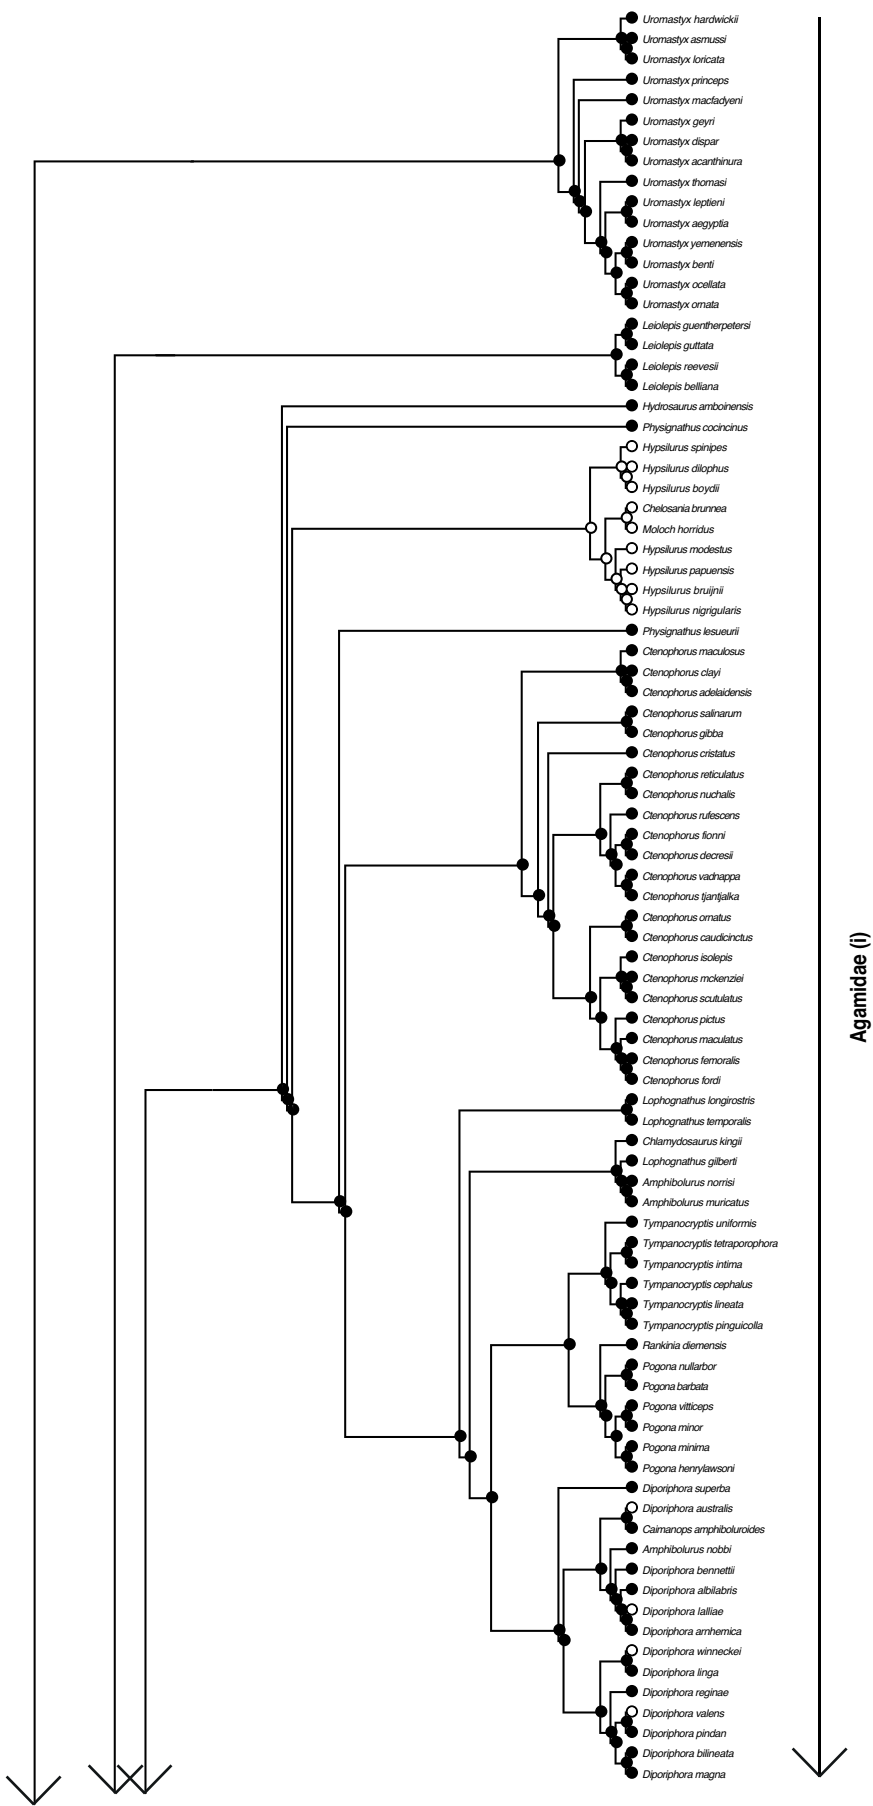

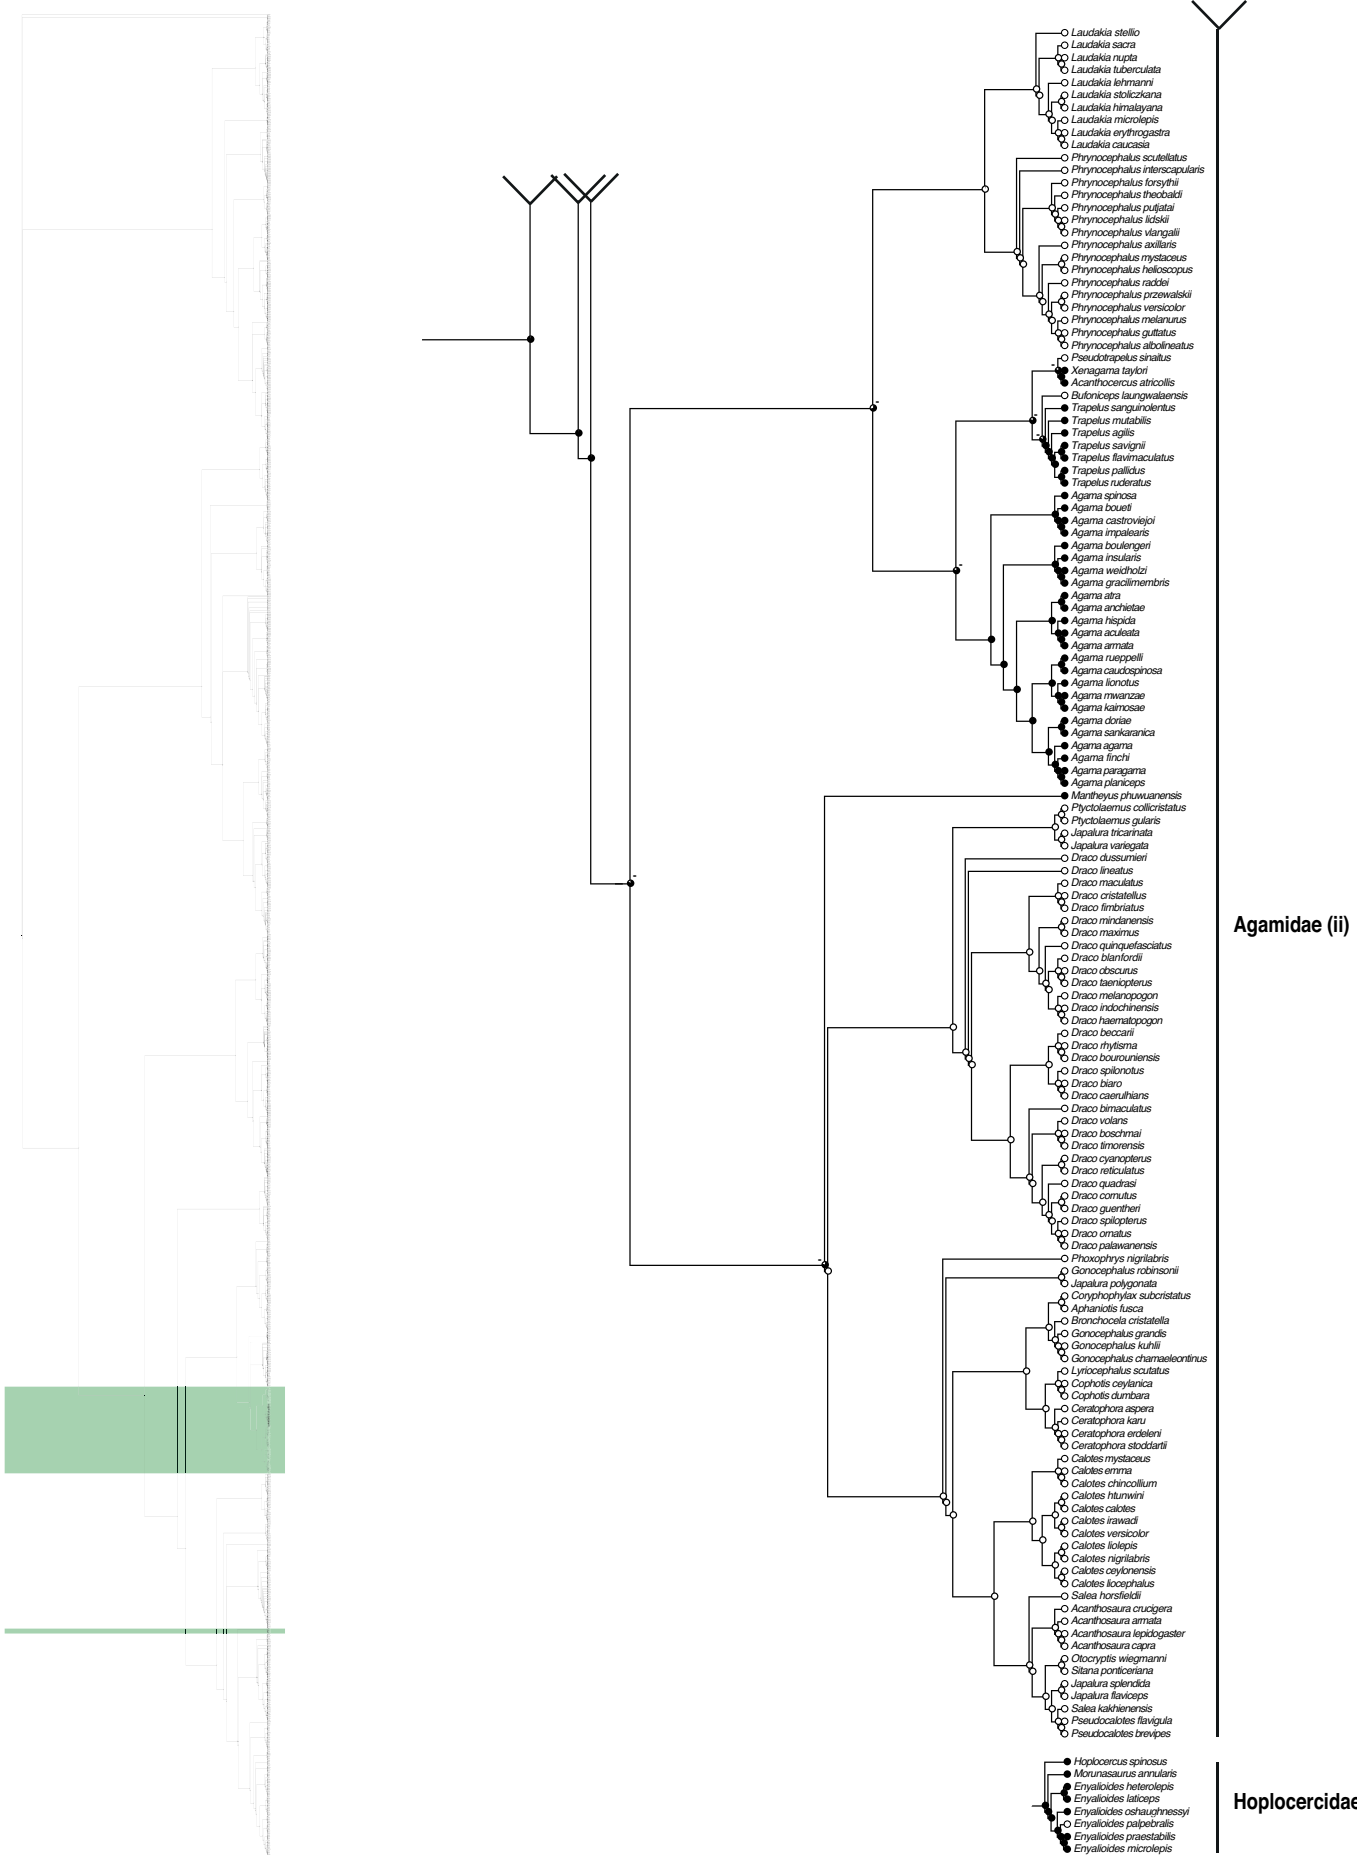

Supplement: Supplementary file 1 [file 1]
