# Supplementary material
Source: publisher figshare collection journal article supplement (https://brill.figshare.com/articles/dataset/_/1558254)
Supplement: Supplementary file 2 [file 1]

# Evolution and role of the follicular epidermal gland system in non-ophidian squamates

Christopher Mayerl<sup>1,\*</sup>, Simon Baeckens<sup>2,\*</sup>, Raoul Van Damme<sup>2</sup>

1 - Clemson University, 132 Long Hall, Department of Biological Sciences, Clemson SC, 29634, USA

2 - University of Antwerp, Laboratory of Functional Morphology, Universiteitsplein 1 - C, 2610 Wilrijk, Belgium

\* These authors contributed equally to the work

## **Supplementary Tables**

**Table S1.** An overview of all non-ophidian squamate families, with information on the presence or absence of epidermal pores for all species included in this study, based on the species included in the phylogenetic tree by Pyron et al. (2013).

| Family           | Total number of species | Number of species with pores | Number of species without pores |
|------------------|-------------------------|------------------------------|---------------------------------|
| Agamidae         | 224                     | 108                          | 116                             |
| Amphisbaenidae   | 41                      | 38                           | 3                               |
| Anguidae         | 40                      | 0                            | 40                              |
| Anniellidae      | 2                       | 0                            | 2                               |
| Bipedidae        | 3                       | 3                            | 0                               |
| Blanidae         | 4                       | 4                            | 0                               |
| Cadeidae         | 1                       | 1                            | 0                               |
| Carphodactylidae | 22                      | 3                            | 19                              |
| Chamaelonidae    | 142                     | 0                            | 142                             |
| Cordylidae       | 42                      | 42                           | 0                               |
| Corytophanidae   | 7                       | 0                            | 7                               |
| Crotaphytidae    | 16                      | 0                            | 16                              |
| Dactyliodae      | 207                     | 0                            | 207                             |
| Dibamidae        | 8                       | 2                            | 6                               |
| Diplodactylidae  | 97                      | 80                           | 17                              |
| Eublepharidae    | 15                      | 13                           | 2                               |
| Gekkonidae       | 353                     | 253                          | 100                             |
| Gerrhosauridae   | 27                      | 27                           | 0                               |
| Gymnophthalmidae | 82                      | 81                           | 1                               |
| Helodermatidae   | 2                       | 0                            | 2                               |
| Hoplocercidae    | 8                       | 7                            | 1                               |

---

|                   |      |      |      |
|-------------------|------|------|------|
| Iguanidae         | 31   | 31   | 0    |
| Lacertidae        | 186  | 185  | 1    |
| Lanthanotidae     | 1    | 0    | 1    |
| Leiocephalidae    | 6    | 0    | 6    |
| Leiosauridae      | 11   | 0    | 11   |
| Liolaemidae       | 119  | 119  | 0    |
| Opliduridae       | 7    | 0    | 7    |
| Phrynosomatidae   | 109  | 109  | 0    |
| Phyllodactylidae  | 49   | 0    | 49   |
| Polychrotidae     | 4    | 4    | 0    |
| Pygopodidae       | 32   | 5    | 27   |
| Rhineuridae       | 1    | 0    | 1    |
| Scincidae         | 683  | 0    | 683  |
| Shinisauridae     | 1    | 1    | 0    |
| Sphaerodactylidae | 92   | 0    | 92   |
| Teiidae           | 62   | 60   | 2    |
| Trogonophiidae    | 2    | 1    | 1    |
| Tropiduridae      | 78   | 0    | 78   |
| Varanidae         | 53   | 0    | 53   |
| Xantusiidae       | 27   | 27   | 0    |
| Xenosauridae      | 2    | 0    | 2    |
| Total             | 2899 | 1204 | 1695 |

---

**Table S2.** Overview of all species included in the ancestral-state reconstruction analysis, with additional information on the absence (0) or presence (1) of epidermal pores per species with respective reference.

| Family   | Species                          | 0 / 1 | Reference                                              |
|----------|----------------------------------|-------|--------------------------------------------------------|
| Agamidae | <i>Acanthocercus atricollis</i>  | 1     | Branch (1994)                                          |
| Agamidae | <i>Acanthosaura armata</i>       | 0     | Ananjeva and Stuart (2001)                             |
| Agamidae | <i>Acanthosaura capra</i>        | 0     | Ananjeva and Stuart (2001)                             |
| Agamidae | <i>Acanthosaura crucigera</i>    | 0     | Ananjeva and Stuart (2001)                             |
| Agamidae | <i>Acanthosaura lepidogaster</i> | 0     | Ananjeva and Stuart (2001)                             |
| Agamidae | <i>Agama aculeata</i>            | 1     | Branch (1994)                                          |
| Agamidae | <i>Agama agama</i>               | 1     | Loveridge (1936)                                       |
| Agamidae | <i>Agama anchietae</i>           | 1     | Boulenger and Power (1921)                             |
| Agamidae | <i>Agama armata</i>              | 1     | Boulenger and Power (1921)                             |
| Agamidae | <i>Agama atra</i>                | 1     | Branch (1994)                                          |
| Agamidae | <i>Agama boueti</i>              | 1     | Chabanaud (1917)                                       |
| Agamidae | <i>Agama boulengeri</i>          | 1     | Boulenger (1887)                                       |
| Agamidae | <i>Agama castroviejoi</i>        | 1     | Loveridge (1936)                                       |
| Agamidae | <i>Agama caudospinosa</i>        | 1     | Meek (1910)                                            |
| Agamidae | <i>Agama doriae</i>              | 1     | Boulenger (1885)                                       |
| Agamidae | <i>Agama finchi</i>              | 1     | Böhme et al. (2005)                                    |
| Agamidae | <i>Agama gracilimembris</i>      | 1     | Grandison (1968)                                       |
| Agamidae | <i>Agama hispida</i>             | 1     | Boulenger and Power (1921)                             |
| Agamidae | <i>Agama impalearis</i>          | 1     | Boulenger (1885)                                       |
| Agamidae | <i>Agama insularis</i>           | 1     | Trape (2011)                                           |
| Agamidae | <i>Agama kaimosae</i>            | 1     | Loveridge (1936)                                       |
| Agamidae | <i>Agama lionotus</i>            | 1     | Boulenger (1896)                                       |
| Agamidae | <i>Agama mwanzae</i>             | 1     | Loveridge (1923)                                       |
| Agamidae | <i>Agama paragama</i>            | 1     | Grandison (1968)                                       |
| Agamidae | <i>Agama planiceps</i>           | 1     | Branch (1994)                                          |
| Agamidae | <i>Agama rueppelli</i>           | 1     | Boulenger (1885)                                       |
| Agamidae | <i>Agama sankaranica</i>         | 1     | Chabanaud (1918)                                       |
| Agamidae | <i>Agama spinosa</i>             | 1     | Wagner et al. (2013)                                   |
| Agamidae | <i>Agama weidholzi</i>           | 1     | Wagner and Bauer (2011)                                |
| Agamidae | <i>Amphibolurus muricatus</i>    | 1     | Cogger (2014)                                          |
| Agamidae | <i>Amphibolurus norrisi</i>      | 1     | Cogger (2014)                                          |
| Agamidae | <i>Aphaniotis fusca</i>          | 0     | Ananjeva and Stuart (2001); Hoser (2014)               |
| Agamidae | <i>Bronchocela cristatella</i>   | 0     | Ananjeva and Stuart (2001); Diong and Lim (1998)       |
| Agamidae | <i>Bufoniceps laungwalaensis</i> | 0     | Arnold (1992)                                          |
| Agamidae | <i>Calotes calotes</i>           | 0     | Smith (1935); Ananjeva and Stuart (2001); Hoser (2014) |

|          |                                   |   |                                                                                    |
|----------|-----------------------------------|---|------------------------------------------------------------------------------------|
| Agamidae | <i>Calotes ceylonensis</i>        | 0 | Smith (1935); Ananjeva and Stuart (2001); Hoser (2014)                             |
| Agamidae | <i>Calotes chincollium</i>        | 0 | Smith (1935); Ananjeva and Stuart (2001); Hoser (2014)                             |
| Agamidae | <i>Calotes emma</i>               | 0 | Smith (1935); Ananjeva and Stuart (2001); Hoser (2014)                             |
| Agamidae | <i>Calotes htunwini</i>           | 0 | Smith (1935); Ananjeva and Stuart (2001); Hoser (2014)                             |
| Agamidae | <i>Calotes irawadi</i>            | 0 | Smith (1935); Ananjeva and Stuart (2001); Hoser (2014)                             |
| Agamidae | <i>Calotes liocephalus</i>        | 0 | Smith (1935); Ananjeva and Stuart (2001); Hoser (2014)                             |
| Agamidae | <i>Calotes liolepis</i>           | 0 | Smith (1935); Ananjeva and Stuart (2001); Hoser (2014)                             |
| Agamidae | <i>Calotes mystaceus</i>          | 0 | Smith (1935); Ananjeva and Stuart (2001); Hoser (2014)                             |
| Agamidae | <i>Calotes nigrilabris</i>        | 0 | Smith (1935); Ananjeva and Stuart (2001); Hoser (2014)                             |
| Agamidae | <i>Calotes versicolor</i>         | 0 | Smith (1935); Ananjeva and Stuart (2001); Hoser (2014)                             |
| Agamidae | <i>Ceratophora aspera</i>         | 0 | Smith (1935); Ananjeva and Stuart (2001)                                           |
| Agamidae | <i>Ceratophora erdeleni</i>       | 0 | Smith (1935); Ananjeva and Stuart (2001)                                           |
| Agamidae | <i>Ceratophora karu</i>           | 0 | Smith (1935); Ananjeva and Stuart (2001)                                           |
| Agamidae | <i>Ceratophora stoddartii</i>     | 0 | Smith (1935); Ananjeva and Stuart (2001)                                           |
| Agamidae | <i>Chelosania brunnea</i>         | 0 | Witten (1993); Ananjeva and Stuart (2001); Cogger (2014)                           |
| Agamidae | <i>Chlamydosaurus kingii</i>      | 1 | Witten (1993); Cogger (2014)                                                       |
| Agamidae | <i>Cophotis ceylanica</i>         | 0 | Smith (1935); Ananjeva and Stuart (2001)                                           |
| Agamidae | <i>Cophotis dumbara</i>           | 0 | Smith (1935); Ananjeva and Stuart (2001)                                           |
| Agamidae | <i>Coryphophylax subcristatus</i> | 0 | Hoser (2014)                                                                       |
| Agamidae | <i>Ctenophorus adelaidensis</i>   | 1 | Hugall et al. (2008)                                                               |
| Agamidae | <i>Ctenophorus caudicinctus</i>   | 1 | Witten (1993); Hugall et al. (2008); Cogger (2014)                                 |
| Agamidae | <i>Ctenophorus clayi</i>          | 1 | Witten (1993); Hugall et al. (2008); Cogger (2014)                                 |
| Agamidae | <i>Ctenophorus cristatus</i>      | 1 | Witten (1993); Hugall et al. (2008); Cogger (2014)                                 |
| Agamidae | <i>Ctenophorus decresii</i>       | 1 | Hugall et al. (2008); Cogger (2014)                                                |
| Agamidae | <i>Ctenophorus femoralis</i>      | 1 | Hugall et al. (2008)                                                               |
| Agamidae | <i>Ctenophorus fionni</i>         | 1 | Hugall et al. (2008)                                                               |
| Agamidae | <i>Ctenophorus fordi</i>          | 1 | Hugall et al. (2008)                                                               |
| Agamidae | <i>Ctenophorus gibba</i>          | 1 | Hugall et al. (2008)                                                               |
| Agamidae | <i>Ctenophorus isolepis</i>       | 1 | Hugall et al. (2008)                                                               |
| Agamidae | <i>Ctenophorus maculatus</i>      | 1 | Hugall et al. (2008)                                                               |
| Agamidae | <i>Ctenophorus maculosus</i>      | 1 | Hugall et al. (2008)                                                               |
| Agamidae | <i>Ctenophorus mckenziei</i>      | 1 | Storr (1981); Hugall et al. (2008)                                                 |
| Agamidae | <i>Ctenophorus nuchalis</i>       | 1 | Witten (1993); Hugall et al. (2008); Cogger (2014); Hutchinson and Williams (2014) |
| Agamidae | <i>Ctenophorus ornatus</i>        | 1 | Hugall et al. (2008)                                                               |
| Agamidae | <i>Ctenophorus pictus</i>         | 1 | Hugall et al. (2008); Cogger (2014)                                                |
| Agamidae | <i>Ctenophorus reticulatus</i>    | 1 | Witten (1993); Hugall et al. (2008); Cogger (2014)                                 |

|          |                                    |   |                                                      |
|----------|------------------------------------|---|------------------------------------------------------|
| Agamidae | <i>Ctenophorus rufescens</i>       | 1 | Johnston (1992); Hugall et al. (2008); Cogger (2014) |
| Agamidae | <i>Ctenophorus salinarum</i>       | 1 | Hugall et al. (2008)                                 |
| Agamidae | <i>Ctenophorus scutulatus</i>      | 1 | Hugall et al. (2008)                                 |
| Agamidae | <i>Ctenophorus tjantjalka</i>      | 1 | Johnston (1992); Hugall et al. (2008); Cogger (2014) |
| Agamidae | <i>Ctenophorus vadrappa</i>        | 1 | Johnston (1992); Hugall et al. (2008)                |
| Agamidae | <i>Diporiphora albilabris</i>      | 1 | Storr (1974)                                         |
| Agamidae | <i>Diporiphora amphiboluroides</i> | 1 | Cogger (2000)                                        |
| Agamidae | <i>Diporiphora arnhemica</i>       | 1 | Cogger (2014)                                        |
| Agamidae | <i>Diporiphora australis</i>       | 0 | Cogger (2014)                                        |
| Agamidae | <i>Diporiphora bennettii</i>       | 1 | Cogger (2014)                                        |
| Agamidae | <i>Diporiphora bilineata</i>       | 1 | Cogger (2000)                                        |
| Agamidae | <i>Diporiphora lalliae</i>         | 0 | Cogger (2014)                                        |
| Agamidae | <i>Diporiphora lingua</i>          | 1 | Cogger (2000)                                        |
| Agamidae | <i>Diporiphora magna</i>           | 1 | Cogger (2000)                                        |
| Agamidae | <i>Diporiphora nobbi</i>           | 1 | Cogger (2014)                                        |
| Agamidae | <i>Diporiphora pindan</i>          | 1 | Cogger (2000)                                        |
| Agamidae | <i>Diporiphora reginae</i>         | 1 | Cogger (2014)                                        |
| Agamidae | <i>Diporiphora superba</i>         | 1 | Cogger (2000)                                        |
| Agamidae | <i>Diporiphora valens</i>          | 0 | Cogger (2014)                                        |
| Agamidae | <i>Diporiphora winneckeii</i>      | 0 | Cogger (2014); Hutchison and Williams (2014)         |
| Agamidae | <i>Draco beccarii</i>              | 0 | Smith (1935); Ananjeva and Stuart (2001)             |
| Agamidae | <i>Draco biaro</i>                 | 0 | Smith (1935); Ananjeva and Stuart (2001)             |
| Agamidae | <i>Draco bimafulatus</i>           | 0 | Smith (1935); Ananjeva and Stuart (2001)             |
| Agamidae | <i>Draco blanfordii</i>            | 0 | Smith (1935); Ananjeva and Stuart (2001)             |
| Agamidae | <i>Draco boschmai</i>              | 0 | Smith (1935); Ananjeva and Stuart (2001)             |
| Agamidae | <i>Draco bourouniensis</i>         | 0 | Smith (1935); Ananjeva and Stuart (2001)             |
| Agamidae | <i>Draco caerulhians</i>           | 0 | Smith (1935); Ananjeva and Stuart (2001)             |
| Agamidae | <i>Draco cornutus</i>              | 0 | Smith (1935); Ananjeva and Stuart (2001)             |
| Agamidae | <i>Draco cristatellus</i>          | 0 | Smith (1935); Ananjeva and Stuart (2001)             |
| Agamidae | <i>Draco cyanopterus</i>           | 0 | Smith (1935); Ananjeva and Stuart (2001)             |
| Agamidae | <i>Draco dussumieri</i>            | 0 | Smith (1935); Ananjeva and Stuart (2001)             |
| Agamidae | <i>Draco fimbriatus</i>            | 0 | Smith (1935); Ananjeva and Stuart (2001)             |
| Agamidae | <i>Draco guentheri</i>             | 0 | Smith (1935); Ananjeva and Stuart (2001)             |
| Agamidae | <i>Draco haematopogon</i>          | 0 | Smith (1935); Ananjeva and Stuart (2001)             |
| Agamidae | <i>Draco indochinensis</i>         | 0 | Smith (1935); Ananjeva and Stuart (2001)             |
| Agamidae | <i>Draco lineatus</i>              | 0 | Smith (1935); Ananjeva and Stuart (2001)             |

|          |                                     |   |                                                          |
|----------|-------------------------------------|---|----------------------------------------------------------|
| Agamidae | <i>Draco maculatus</i>              | 0 | Smith (1935); Ananjeva and Stuart (2001)                 |
| Agamidae | <i>Draco maximus</i>                | 0 | Smith (1935); Ananjeva and Stuart (2001)                 |
| Agamidae | <i>Draco melanopogon</i>            | 0 | Smith (1935); Ananjeva and Stuart (2001)                 |
| Agamidae | <i>Draco mindanensis</i>            | 0 | Smith (1935); Ananjeva and Stuart (2001)                 |
| Agamidae | <i>Draco obscurus</i>               | 0 | Smith (1935); Ananjeva and Stuart (2001)                 |
| Agamidae | <i>Draco ornatus</i>                | 0 | Smith (1935); Ananjeva and Stuart (2001)                 |
| Agamidae | <i>Draco palawanensis</i>           | 0 | Smith (1935); Ananjeva and Stuart (2001)                 |
| Agamidae | <i>Draco quadrasi</i>               | 0 | Smith (1935); Ananjeva and Stuart (2001)                 |
| Agamidae | <i>Draco quinquefasciatus</i>       | 0 | Smith (1935); Ananjeva and Stuart (2001)                 |
| Agamidae | <i>Draco reticulatus</i>            | 0 | Smith (1935); Ananjeva and Stuart (2001)                 |
| Agamidae | <i>Draco rhytisma</i>               | 0 | Smith (1935); Ananjeva and Stuart (2001)                 |
| Agamidae | <i>Draco spilonotus</i>             | 0 | Smith (1935); Ananjeva and Stuart (2001)                 |
| Agamidae | <i>Draco spilopterus</i>            | 0 | Smith (1935); Ananjeva and Stuart (2001)                 |
| Agamidae | <i>Draco taeniopterus</i>           | 0 | Smith (1935); Ananjeva and Stuart (2001)                 |
| Agamidae | <i>Draco timorensis</i>             | 0 | Smith (1935); Ananjeva and Stuart (2001)                 |
| Agamidae | <i>Draco volans</i>                 | 0 | Smith (1935); Ananjeva and Stuart (2001)                 |
| Agamidae | <i>Gonocephalus chamaeleontinus</i> | 0 | Smith (1935); Ananjeva and Stuart (2001)                 |
| Agamidae | <i>Gonocephalus grandis</i>         | 0 | Smith (1935); Ananjeva and Stuart (2001)                 |
| Agamidae | <i>Gonocephalus kuhlii</i>          | 0 | Smith (1935); Ananjeva and Stuart (2001)                 |
| Agamidae | <i>Gonocephalus robinsonii</i>      | 0 | Smith (1935); Ananjeva and Stuart (2001)                 |
| Agamidae | <i>Hydrosaurus amboinensis</i>      | 1 | De Rooy (1915)                                           |
| Agamidae | <i>Hypsilurus boydii</i>            | 0 | Witten (1993); Ananjeva and Stuart (2001); Cogger (2014) |
| Agamidae | <i>Hypsilurus bruijnii</i>          | 0 | Witten (1993); Ananjeva and Stuart (2001); Cogger (2014) |
| Agamidae | <i>Hypsilurus dilophus</i>          | 0 | Witten (1993); Ananjeva and Stuart (2001); Cogger (2014) |
| Agamidae | <i>Hypsilurus modestus</i>          | 0 | Witten (1993); Ananjeva and Stuart (2001); Cogger (2014) |
| Agamidae | <i>Hypsilurus nigrigularis</i>      | 0 | Witten (1993); Ananjeva and Stuart (2001); Cogger (2014) |
| Agamidae | <i>Hypsilurus papuensis</i>         | 0 | Witten (1993); Ananjeva and Stuart (2001); Cogger (2014) |
| Agamidae | <i>Hypsilurus spinipes</i>          | 0 | Witten (1993); Ananjeva and Stuart (2001); Cogger (2014) |
| Agamidae | <i>Japalura flaviceps</i>           | 0 | Smith (1935); Ananjeva and Stuart (2001)                 |
| Agamidae | <i>Japalura polygonata</i>          | 0 | Smith (1935); Ananjeva and Stuart (2001)                 |
| Agamidae | <i>Japalura splendida</i>           | 0 | Smith (1935); Ananjeva and Stuart (2001)                 |
| Agamidae | <i>Japalura tricarinata</i>         | 0 | Smith (1935); Ananjeva and Stuart (2001)                 |
| Agamidae | <i>Japalura variegata</i>           | 0 | Smith (1935); Ananjeva and Stuart (2001)                 |
| Agamidae | <i>Laudakia caucasia</i>            | 0 | Ananjeva and Stuart (2001)                               |
| Agamidae | <i>Laudakia erythrogastra</i>       | 0 | Ananjeva and Stuart (2001)                               |
| Agamidae | <i>Laudakia</i>                     | 0 | Ananjeva and Stuart (2001)                               |

|          |                                       |   |                                             |
|----------|---------------------------------------|---|---------------------------------------------|
|          | <i>himalayana</i>                     |   |                                             |
| Agamidae | <i>Laudakia lehmanni</i>              | 0 | Ananjeva and Stuart (2001)                  |
| Agamidae | <i>Laudakia microlepis</i>            | 0 | Ananjeva and Stuart (2001)                  |
| Agamidae | <i>Laudakia nupta</i>                 | 0 | Ananjeva and Stuart (2001)                  |
| Agamidae | <i>Laudakia sacra</i>                 | 0 | Ananjeva and Stuart (2001)                  |
| Agamidae | <i>Laudakia stellio</i>               | 0 | Ananjeva and Stuart (2001)                  |
| Agamidae | <i>Laudakia stoliczkana</i>           | 0 | Ananjeva and Stuart (2001)                  |
| Agamidae | <i>Laudakia tuberculata</i>           | 0 | Ananjeva and Stuart (2001)                  |
| Agamidae | <i>Leiolepis belliana</i>             | 1 | De Rooy (1915); Smith (1935); Witten (1993) |
| Agamidae | <i>Leiolepis guentherpetersi</i>      | 1 | De Rooy (1915); Smith (1935); Witten (1993) |
| Agamidae | <i>Leiolepis guttata</i>              | 1 | De Rooy (1915); Smith (1935); Witten (1993) |
| Agamidae | <i>Leiolepis reevesii</i>             | 1 | De Rooy (1915); Smith (1935); Witten (1993) |
| Agamidae | <i>Lophognathus gilberti</i>          | 1 | Cogger (2014)                               |
| Agamidae | <i>Lophognathus longirostris</i>      | 1 | Cogger (2014)                               |
| Agamidae | <i>Lophognathus temporalis</i>        | 1 | Cogger (2014)                               |
| Agamidae | <i>Lyriocephalus scutatus</i>         | 0 | Smith (1935); Ananjeva and Stuart (2001)    |
| Agamidae | <i>Mantheyus phuwanensis</i>          | 1 | Ananjeva and Stuart (2001)                  |
| Agamidae | <i>Moloch horridus</i>                | 0 | Witten (1993); Ananjeva and Stuart (2001)   |
| Agamidae | <i>Otocryptis wiegmanni</i>           | 0 | Smith (1935)                                |
| Agamidae | <i>Phoxophrys nigrilabris</i>         | 0 | De Rooy (1915)                              |
| Agamidae | <i>Phrynocephalus albolineatus</i>    | 0 | Smith (1935); Ananjeva and Stuart (2001)    |
| Agamidae | <i>Phrynocephalus axillaris</i>       | 0 | Smith (1935); Ananjeva and Stuart (2001)    |
| Agamidae | <i>Phrynocephalus forsythii</i>       | 0 | Smith (1935); Ananjeva and Stuart (2001)    |
| Agamidae | <i>Phrynocephalus guttatus</i>        | 0 | Smith (1935); Ananjeva and Stuart (2001)    |
| Agamidae | <i>Phrynocephalus helioscopus</i>     | 0 | Smith (1935); Ananjeva and Stuart (2001)    |
| Agamidae | <i>Phrynocephalus interscapularis</i> | 0 | Smith (1935); Ananjeva and Stuart (2001)    |
| Agamidae | <i>Phrynocephalus lidskii</i>         | 0 | Smith (1935); Ananjeva and Stuart (2001)    |
| Agamidae | <i>Phrynocephalus melanurus</i>       | 0 | Smith (1935); Ananjeva and Stuart (2001)    |
| Agamidae | <i>Phrynocephalus mystaceus</i>       | 0 | Smith (1935); Ananjeva and Stuart (2001)    |
| Agamidae | <i>Phrynocephalus przewalskii</i>     | 0 | Smith (1935); Ananjeva and Stuart (2001)    |
| Agamidae | <i>Phrynocephalus putjatai</i>        | 0 | Smith (1935); Ananjeva and Stuart (2001)    |
| Agamidae | <i>Phrynocephalus raddei</i>          | 0 | Smith (1935); Ananjeva and Stuart (2001)    |
| Agamidae | <i>Phrynocephalus</i>                 | 0 | Smith (1935); Ananjeva and Stuart (2001)    |



|          |                                      |   |                                                                   |
|----------|--------------------------------------|---|-------------------------------------------------------------------|
|          | <i>scutellatus</i>                   |   |                                                                   |
| Agamidae | <i>Phrynocephalus theobaldi</i>      | 0 | Smith (1935); Ananjeva and Stuart (2001)                          |
| Agamidae | <i>Phrynocephalus versicolor</i>     | 0 | Smith (1935); Ananjeva and Stuart (2001)                          |
| Agamidae | <i>Phrynocephalus vlangalii</i>      | 0 | Smith (1935); Ananjeva and Stuart (2001)                          |
| Agamidae | <i>Physignathus cocincinus</i>       | 1 | De Rooy (1915); Smith (1935); Witten (1993); Higall et al. (2008) |
| Agamidae | <i>Physignathus lesueurii</i>        | 1 | De Rooy (1915); Smith (1935); Witten (1993); Higall et al. (2008) |
| Agamidae | <i>Pogona barbata</i>                | 1 | Witten (1993); Huggal et al. (2008)                               |
| Agamidae | <i>Pogona henrylawsoni</i>           | 1 | Witten (1993); Huggal et al. (2008)                               |
| Agamidae | <i>Pogona minima</i>                 | 1 | Witten (1993); Huggal et al. (2008)                               |
| Agamidae | <i>Pogona minor</i>                  | 1 | Witten (1993); Huggal et al. (2008)                               |
| Agamidae | <i>Pogona nullarbor</i>              | 1 | Witten (1993); Huggal et al. (2008)                               |
| Agamidae | <i>Pogona vitticeps</i>              | 1 | Witten (1993); Huggal et al. (2008)                               |
| Agamidae | <i>Pseudocalotes brevipes</i>        | 0 | Ananjeva and Stuart (2001)                                        |
| Agamidae | <i>Pseudocalotes flavigula</i>       | 0 | Ananjeva and Stuart (2001)                                        |
| Agamidae | <i>Pseudotrapelus sinaitus</i>       | 0 | Smith (1935); Ananjeva and Stuart (2001)                          |
| Agamidae | <i>Ptyctolaemus collicristatus</i>   | 0 | Smith (1935)                                                      |
| Agamidae | <i>Ptyctolaemus gularis</i>          | 0 | Smith (1935)                                                      |
| Agamidae | <i>Rankinia diemensis</i>            | 1 | Hugall et al. (2008); Cogger (2014)                               |
| Agamidae | <i>Salea horsfieldii</i>             | 0 | Smith (1935); Ananjeva and Stuart (2001)                          |
| Agamidae | <i>Salea kakhienensis</i>            | 0 | Smith (1935); Ananjeva and Stuart (2001)                          |
| Agamidae | <i>Sitana ponticeriana</i>           | 0 | Smith (1935); Ananjeva and Stuart (2001)                          |
| Agamidae | <i>Trapelus agilis</i>               | 1 | Leviton and Anderson (1967)                                       |
| Agamidae | <i>Trapelus flavimaculatus</i>       | 1 | Loveridge (1936)                                                  |
| Agamidae | <i>Trapelus mutabilis</i>            | 1 | Wagner and Böhme (2007); Wagner et al. (2011)                     |
| Agamidae | <i>Trapelus pallidus</i>             | 1 | Wagner et al. (2011)                                              |
| Agamidae | <i>Trapelus ruderatus</i>            | 1 | Rastegar-Pouyani (1998)                                           |
| Agamidae | <i>Trapelus sanguinolentus</i>       | 1 | Boulenger (1885)                                                  |
| Agamidae | <i>Trapelus savignii</i>             | 1 | Wagner et al. (2011)                                              |
| Agamidae | <i>Tympanocryptis cephalus</i>       | 1 | Cogger (2014)                                                     |
| Agamidae | <i>Tympanocryptis intima</i>         | 1 | Cogger (2014)                                                     |
| Agamidae | <i>Tympanocryptis lineata</i>        | 1 | Cogger (2014)                                                     |
| Agamidae | <i>Tympanocryptis pinguicollis</i>   | 1 | Mitchell (1948)                                                   |
| Agamidae | <i>Tympanocryptis tetraporophora</i> | 1 | Hutchinson and Williams (2014)                                    |
| Agamidae | <i>Tympanocryptis uniformis</i>      | 1 | Mitchell (1948)                                                   |
| Agamidae | <i>Uromastyx</i>                     | 1 | Smith (1935); Witten (1993)                                       |

|             |                                 |   |                                     |
|-------------|---------------------------------|---|-------------------------------------|
|             | <i>acanthinura</i>              |   |                                     |
| Agamidae    | <i>Uromastyx aegyptia</i>       | 1 | Smith (1935); Witten (1993)         |
| Agamidae    | <i>Uromastyx asmussi</i>        | 1 | Smith (1935); Witten (1993)         |
| Agamidae    | <i>Uromastyx benti</i>          | 1 | Smith (1935); Witten (1993)         |
| Agamidae    | <i>Uromastyx dispar</i>         | 1 | Smith (1935); Witten (1993)         |
| Agamidae    | <i>Uromastyx geyri</i>          | 1 | Smith (1935); Witten (1993)         |
| Agamidae    | <i>Uromastyx hardwickii</i>     | 1 | Smith (1935); Witten (1993)         |
| Agamidae    | <i>Uromastyx leptieni</i>       | 1 | Smith (1935); Witten (1993)         |
| Agamidae    | <i>Uromastyx loricata</i>       | 1 | Smith (1935); Witten (1993)         |
| Agamidae    | <i>Uromastyx macfadyeni</i>     | 1 | Smith (1935); Witten (1993)         |
| Agamidae    | <i>Uromastyx ocellata</i>       | 1 | Smith (1935); Witten (1993)         |
| Agamidae    | <i>Uromastyx ornata</i>         | 1 | Smith (1935); Witten (1993)         |
| Agamidae    | <i>Uromastyx princeps</i>       | 1 | Smith (1935); Witten (1993)         |
| Agamidae    | <i>Uromastyx thomasi</i>        | 1 | Smith (1935); Witten (1993)         |
| Agamidae    | <i>Uromastyx yemenensis</i>     | 1 | Smith (1935); Witten (1993)         |
| Agamidae    | <i>Xenagama taylori</i>         | 1 | Wagner et al. (2013)                |
| Amphisbaena | <i>Amphisbaena alba</i>         | 1 | Vanzoli (2002)                      |
| Amphisbaena | <i>Amphisbaena anaemariae</i>   | 1 | Vanzoli (2002)                      |
| Amphisbaena | <i>Amphisbaena angustifrons</i> | 1 | Vanzoli (2002); Perez et al. (2012) |
| Amphisbaena | <i>Amphisbaena anomala</i>      | 1 | Gans (1971)                         |
| Amphisbaena | <i>Amphisbaena bakeri</i>       | 1 | Thomas (1966)                       |
| Amphisbaena | <i>Amphisbaena barbouri</i>     | 1 | Gans and Alexander (1962)           |
| Amphisbaena | <i>Amphisbaena bolivica</i>     | 1 | Vanzoli (2002)                      |
| Amphisbaena | <i>Amphisbaena brasiliana</i>   | 1 | Gans (1971)                         |
| Amphisbaena | <i>Amphisbaena caeca</i>        | 1 | Thomas (1966)                       |
| Amphisbaena | <i>Amphisbaena camura</i>       | 1 | Vanzoli (2002)                      |
| Amphisbaena | <i>Amphisbaena carlgansi</i>    | 1 | Thomas and Hedges (1998)            |
| Amphisbaena | <i>Amphisbaena cubana</i>       | 1 | Gans et al. (1962)                  |
| Amphisbaena | <i>Amphisbaena cuiabana</i>     | 1 | Strussman and Carvalho (2001)       |
| Amphisbaena | <i>Amphisbaena cunhai</i>       | 1 | Hoogmoed and Avila-Pires (1991)     |
| Amphisbaena | <i>Amphisbaena darwini</i>      | 1 | Vanzoli (2002); Perez et al. (2012) |
| Amphisbaena | <i>Amphisbaena fenestrata</i>   | 1 | Thomas (1966)                       |
| Amphisbaena | <i>Amphisbaena fuliginosa</i>   | 1 | Vanzoli (2002)                      |
| Amphisbaena | <i>Amphisbaena hastata</i>      | 1 | Vanzoli (2002)                      |
| Amphisbaena | <i>Amphisbaena</i>              | 1 | Vanzoli (2002)                      |

|             |                                  |   |                                                                                       |
|-------------|----------------------------------|---|---------------------------------------------------------------------------------------|
|             | <i>hyporissor</i>                |   |                                                                                       |
| Amphisbaena | <i>Amphisbaena ignatiana</i>     | 1 | Vanzoli (2002)                                                                        |
| Amphisbaena | <i>Amphisbaena infraorbitale</i> | 0 | Gans (1971)                                                                           |
| Amphisbaena | <i>Amphisbaena innocens</i>      | 1 | Thomas (1965)                                                                         |
| Amphisbaena | <i>Amphisbaena kingii</i>        | 1 | Vanzoli (2002); Perez et al. (2012)                                                   |
| Amphisbaena | <i>Amphisbaena kraoh</i>         | 1 | Gans (1971)                                                                           |
| Amphisbaena | <i>Amphisbaena leali</i>         | 1 | Vanzoli (2002)                                                                        |
| Amphisbaena | <i>Amphisbaena leseri</i>        | 1 | Vanzoli (2002); Perez et al. (2012)                                                   |
| Amphisbaena | <i>Amphisbaena manni</i>         | 1 | Gans et al. (1962)                                                                    |
| Amphisbaena | <i>Amphisbaena mertensii</i>     | 1 | Vanzoli (2002)                                                                        |
| Amphisbaena | <i>Amphisbaena microcephalum</i> | 0 | Gans (1971)                                                                           |
| Amphisbaena | <i>Amphisbaena munoai</i>        | 1 | Vanzoli (2002); Perez et al. (2012)                                                   |
| Amphisbaena | <i>Amphisbaena polystegum</i>    | 1 | Gans (1971); Ribeiro et al. (2008)                                                    |
| Amphisbaena | <i>Amphisbaena roberti</i>       | 1 | Gans (1964a)                                                                          |
| Amphisbaena | <i>Amphisbaena saxosa</i>        | 1 | Gans (1971)                                                                           |
| Amphisbaena | <i>Amphisbaena schmidtii</i>     | 1 | Gans (1964b); Thomas (1966)                                                           |
| Amphisbaena | <i>Amphisbaena silvestrii</i>    | 1 | Vanzoli (2002)                                                                        |
| Amphisbaena | <i>Amphisbaena vermicularis</i>  | 1 | Vanzoli (2002)                                                                        |
| Amphisbaena | <i>Amphisbaena xera</i>          | 1 | Thomas (1966)                                                                         |
| Amphisbaena | <i>Chirindia swynnertoni</i>     | 0 | Boulenger (1907)                                                                      |
| Amphisbaena | <i>Cynisca leucura</i>           | 1 | Gans (1987)                                                                           |
| Amphisbaena | <i>Geocalamus acutus</i>         | 1 | Gans and Kraklau (1989)                                                               |
| Amphisbaena | <i>Monopeltis capensis</i>       | 1 | Broadley et al. (1976)                                                                |
| Anguidae    | <i>Abronia anzuetoi</i>          | 0 | Camp (1923); Smith (1935); Estes et al. (1988); Jullien and Renous-Lécuru (1972,1973) |
| Anguidae    | <i>Abronia aurita</i>            | 0 | Camp (1923); Smith (1935); Estes et al. (1988); Jullien and Renous-Lécuru (1972,1973) |
| Anguidae    | <i>Abronia campbelli</i>         | 0 | Camp (1923); Smith (1935); Estes et al. (1988); Jullien and Renous-Lécuru (1972,1973) |
| Anguidae    | <i>Abronia chiszari</i>          | 0 | Camp (1923); Smith (1935); Estes et al. (1988); Jullien and Renous-Lécuru (1972,1973) |
| Anguidae    | <i>Abronia fimbriata</i>         | 0 | Camp (1923); Smith (1935); Estes et al. (1988); Jullien and Renous-Lécuru (1972,1973) |
| Anguidae    | <i>Abronia frosti</i>            | 0 | Camp (1923); Smith (1935); Estes et al. (1988); Jullien and Renous-Lécuru (1972,1973) |
| Anguidae    | <i>Abronia graminea</i>          | 0 | Camp (1923); Smith (1935); Estes et al. (1988); Jullien and Renous-Lécuru (1972,1973) |
| Anguidae    | <i>Abronia lythrochila</i>       | 0 | Camp (1923); Smith (1935); Estes et al. (1988); Jullien and Renous-Lécuru (1972,1973) |
| Anguidae    | <i>Abronia matudai</i>           | 0 | Camp (1923); Smith (1935); Estes et al. (1988); Jullien and Renous-Lécuru (1972,1973) |
| Anguidae    | <i>Abronia mixteca</i>           | 0 | Camp (1923); Smith (1935); Estes et al. (1988); Jullien                               |

|          |                                |   |                                                                                       |
|----------|--------------------------------|---|---------------------------------------------------------------------------------------|
|          |                                |   | and Renous-Lécure (1972,1973)                                                         |
| Anguidae | <i>Abronia oaxacae</i>         | 0 | Camp (1923); Smith (1935); Estes et al. (1988); Jullien and Renous-Lécure (1972,1973) |
| Anguidae | <i>Abronia ornelasi</i>        | 0 | Camp (1923); Smith (1935); Estes et al. (1988); Jullien and Renous-Lécure (1972,1973) |
| Anguidae | <i>Anguis fragilis</i>         | 0 | Camp (1923); Smith (1935); Estes et al. (1988); Jullien and Renous-Lécure (1972,1973) |
| Anguidae | <i>Barisia herrerae</i>        | 0 | Camp (1923); Smith (1935); Estes et al. (1988); Jullien and Renous-Lécure (1972,1973) |
| Anguidae | <i>Barisia imbricata</i>       | 0 | Camp (1923); Smith (1935); Estes et al. (1988); Jullien and Renous-Lécure (1972,1973) |
| Anguidae | <i>Barisia levicollis</i>      | 0 | Camp (1923); Smith (1935); Estes et al. (1988); Jullien and Renous-Lécure (1972,1973) |
| Anguidae | <i>Barisia rudicollis</i>      | 0 | Camp (1923); Smith (1935); Estes et al. (1988); Jullien and Renous-Lécure (1972,1973) |
| Anguidae | <i>Celestus agasepsoides</i>   | 0 | Camp (1923); Smith (1935); Estes et al. (1988); Jullien and Renous-Lécure (1972,1973) |
| Anguidae | <i>Celestus enneagrammus</i>   | 0 | Camp (1923); Smith (1935); Estes et al. (1988); Jullien and Renous-Lécure (1972,1973) |
| Anguidae | <i>Celestus haetianus</i>      | 0 | Camp (1923); Smith (1935); Estes et al. (1988); Jullien and Renous-Lécure (1972,1973) |
| Anguidae | <i>Coloptychon rhombifer</i>   | 0 | Camp (1923); Smith (1935); Estes et al. (1988); Jullien and Renous-Lécure (1972,1973) |
| Anguidae | <i>Diploglossus bilobatus</i>  | 0 | Camp (1923); Smith (1935); Estes et al. (1988); Jullien and Renous-Lécure (1972,1973) |
| Anguidae | <i>Diploglossus pleii</i>      | 0 | Camp (1923); Smith (1935); Estes et al. (1988); Jullien and Renous-Lécure (1972,1973) |
| Anguidae | <i>Elgaria coerulea</i>        | 0 | Camp (1923); Smith (1935); Estes et al. (1988); Jullien and Renous-Lécure (1972,1973) |
| Anguidae | <i>Elgaria kingii</i>          | 0 | Camp (1923); Smith (1935); Estes et al. (1988); Jullien and Renous-Lécure (1972,1973) |
| Anguidae | <i>Elgaria multicarinata</i>   | 0 | Camp (1923); Smith (1935); Estes et al. (1988); Jullien and Renous-Lécure (1972,1973) |
| Anguidae | <i>Elgaria panamintina</i>     | 0 | Camp (1923); Smith (1935); Estes et al. (1988); Jullien and Renous-Lécure (1972,1973) |
| Anguidae | <i>Elgaria paucicarinata</i>   | 0 | Camp (1923); Smith (1935); Estes et al. (1988); Jullien and Renous-Lécure (1972,1973) |
| Anguidae | <i>Gerrhonotus infernalis</i>  | 0 | Camp (1923); Smith (1935); Estes et al. (1988); Jullien and Renous-Lécure (1972,1973) |
| Anguidae | <i>Gerrhonotus liocephalus</i> | 0 | Camp (1923); Smith (1935); Estes et al. (1988); Jullien and Renous-Lécure (1972,1973) |
| Anguidae | <i>Gerrhonotus parvus</i>      | 0 | Camp (1923); Smith (1935); Estes et al. (1988); Jullien and Renous-Lécure (1972,1973) |
| Anguidae | <i>Mesaspis gadovii</i>        | 0 | Camp (1923); Smith (1935); Estes et al. (1988); Jullien and Renous-Lécure (1972,1973) |
| Anguidae | <i>Mesaspis moreletii</i>      | 0 | Camp (1923); Smith (1935); Estes et al. (1988); Jullien and Renous-Lécure (1972,1973) |
| Anguidae | <i>Ophiodes striatus</i>       | 0 | Camp (1923); Smith (1935); Estes et al. (1988); Jullien and Renous-Lécure (1972,1973) |
| Anguidae | <i>Ophisaurus attenuatus</i>   | 0 | Camp (1923); Smith (1935); Estes et al. (1988); Jullien and Renous-Lécure (1972,1973) |
| Anguidae | <i>Ophisaurus gracilis</i>     | 0 | Camp (1923); Smith (1935); Estes et al. (1988); Jullien and Renous-Lécure (1972,1973) |
| Anguidae | <i>Ophisaurus harti</i>        | 0 | Camp (1923); Smith (1935); Estes et al. (1988); Jullien and Renous-Lécure (1972,1973) |
| Anguidae | <i>Ophisaurus koellikeri</i>   | 0 | Camp (1923); Smith (1935); Estes et al. (1988); Jullien and Renous-Lécure (1972,1973) |
| Anguidae | <i>Ophisaurus ventralis</i>    | 0 | Camp (1923); Smith (1935); Estes et al. (1988); Jullien and Renous-Lécure (1972,1973) |

|                  |                                   |   |                                                                                       |
|------------------|-----------------------------------|---|---------------------------------------------------------------------------------------|
| Anguidae         | <i>Pseudopus apodus</i>           | 0 | Camp (1923); Smith (1935); Estes et al. (1988); Jullien and Renous-Lécure (1972,1973) |
| Anniellidae      | <i>Anniella geronimensis</i>      | 0 | pers. comm. Theodore J. Papenfuss                                                     |
| Anniellidae      | <i>Anniella pulchra</i>           | 0 | pers. comm. Theodore J. Papenfuss                                                     |
| Bipedidae        | <i>Bipes biporus</i>              | 1 | Gans (1971)                                                                           |
| Bipedidae        | <i>Bipes canaliculatus</i>        | 1 | Gans (1971)                                                                           |
| Bipedidae        | <i>Bipes tridactylus</i>          | 1 | Gans (1971)                                                                           |
| Blanidae         | <i>Blanus cinereus</i>            | 1 | Gans (1971)                                                                           |
| Blanidae         | <i>Blanus mettetalii</i>          | 1 | Gans (1971)                                                                           |
| Blanidae         | <i>Blanus strauchi</i>            | 1 | Gans (1971)                                                                           |
| Blanidae         | <i>Blanus tingitanus</i>          | 1 | Gans (1971)                                                                           |
| Cadeidae         | <i>Cadea blanoidea</i>            | 1 | Gans (1971)                                                                           |
| Carphodactylidae | <i>Carphodactylus laevis</i>      | 1 | Cogger (2014)                                                                         |
| Carphodactylidae | <i>Nephrurus amya</i>             | 0 | Kluge and Nussbaum (1995); Cogger (2014)                                              |
| Carphodactylidae | <i>Nephrurus asper</i>            | 0 | Kluge and Nussbaum (1995); Cogger (2014)                                              |
| Carphodactylidae | <i>Nephrurus deleani</i>          | 0 | Kluge and Nussbaum (1995); Cogger (2014)                                              |
| Carphodactylidae | <i>Nephrurus laevis</i>           | 0 | Kluge and Nussbaum (1995); Cogger (2014)                                              |
| Carphodactylidae | <i>Nephrurus levis</i>            | 0 | Kluge and Nussbaum (1995); Cogger (2014)                                              |
| Carphodactylidae | <i>Nephrurus sheai</i>            | 0 | Kluge and Nussbaum (1995); Cogger (2014)                                              |
| Carphodactylidae | <i>Nephrurus stellatus</i>        | 0 | Kluge and Nussbaum (1995); Cogger (2014)                                              |
| Carphodactylidae | <i>Nephrurus vertebralis</i>      | 0 | Kluge and Nussbaum (1995); Cogger (2014)                                              |
| Carphodactylidae | <i>Nephrurus wheeleri</i>         | 0 | Kluge and Nussbaum (1995); Cogger (2014)                                              |
| Carphodactylidae | <i>Orraya occultus</i>            | 0 | Couper et al. (2000)                                                                  |
| Carphodactylidae | <i>Phyllurus amnicola</i>         | 0 | Couper et al. (2000)                                                                  |
| Carphodactylidae | <i>Phyllurus kabikabi</i>         | 0 | Couper et al. (2008)                                                                  |
| Carphodactylidae | <i>Phyllurus platurus</i>         | 0 | Bartlett (1938)                                                                       |
| Carphodactylidae | <i>Saltuarius cornutus</i>        | 1 | Hoskin and Couper (2013)                                                              |
| Carphodactylidae | <i>Saltuarius kateae</i>          | 0 | Hoskin and Couper (2013)                                                              |
| Carphodactylidae | <i>Saltuarius moritzi</i>         | 0 | Hoskin and Couper (2013)                                                              |
| Carphodactylidae | <i>Saltuarius salebrosus</i>      | 1 | Hoskin and Couper (2013)                                                              |
| Carphodactylidae | <i>Saltuarius swaini</i>          | 0 | Hoskin and Couper (2013)                                                              |
| Carphodactylidae | <i>Saltuarius wyberba</i>         | 0 | Hoskin and Couper (2013)                                                              |
| Carphodactylidae | <i>Underwoodisaurus milii</i>     | 0 | Cogger (2014)                                                                         |
| Carphodactylidae | <i>Underwoodisaurus sphyrurus</i> | 0 | Cogger (2014)                                                                         |
| Chamaeleonidae   | <i>Bradypodion atromontanum</i>   | 0 | Camp (1923); Smith (1935); Estes et al. (1988); Jullien and Renous-Lécure (1972,1973) |
| Chamaeleonidae   | <i>Bradypodion caffrum</i>        | 0 | Camp (1923); Smith (1935); Estes et al. (1988); Jullien and Renous-Lécure (1972,1973) |
| Chamaeleonidae   | <i>Bradypodion damaranum</i>      | 0 | Camp (1923); Smith (1935); Estes et al. (1988); Jullien and Renous-Lécure (1972,1973) |
| Chamaeleonidae   | <i>Bradypodion dracomontanum</i>  | 0 | Camp (1923); Smith (1935); Estes et al. (1988); Jullien and Renous-Lécure (1972,1973) |
| Chamaeleonidae   | <i>Bradypodion gutturale</i>      | 0 | Camp (1923); Smith (1935); Estes et al. (1988); Jullien and Renous-Lécure (1972,1973) |

|                |                                   |   |                                                                                       |
|----------------|-----------------------------------|---|---------------------------------------------------------------------------------------|
| Chamaeleonidae | <i>Bradypodion karrooicum</i>     | 0 | Camp (1923); Smith (1935); Estes et al. (1988); Jullien and Renous-Lécure (1972,1973) |
| Chamaeleonidae | <i>Bradypodion melanocephalum</i> | 0 | Camp (1923); Smith (1935); Estes et al. (1988); Jullien and Renous-Lécure (1972,1973) |
| Chamaeleonidae | <i>Bradypodion nemorale</i>       | 0 | Camp (1923); Smith (1935); Estes et al. (1988); Jullien and Renous-Lécure (1972,1973) |
| Chamaeleonidae | <i>Bradypodion occidentale</i>    | 0 | Camp (1923); Smith (1935); Estes et al. (1988); Jullien and Renous-Lécure (1972,1973) |
| Chamaeleonidae | <i>Bradypodion pumilum</i>        | 0 | Camp (1923); Smith (1935); Estes et al. (1988); Jullien and Renous-Lécure (1972,1973) |
| Chamaeleonidae | <i>Bradypodion setaroi</i>        | 0 | Camp (1923); Smith (1935); Estes et al. (1988); Jullien and Renous-Lécure (1972,1973) |
| Chamaeleonidae | <i>Bradypodion taeniabronchum</i> | 0 | Camp (1923); Smith (1935); Estes et al. (1988); Jullien and Renous-Lécure (1972,1973) |
| Chamaeleonidae | <i>Bradypodion thamnobates</i>    | 0 | Camp (1923); Smith (1935); Estes et al. (1988); Jullien and Renous-Lécure (1972,1973) |
| Chamaeleonidae | <i>Bradypodion transvaalense</i>  | 0 | Camp (1923); Smith (1935); Estes et al. (1988); Jullien and Renous-Lécure (1972,1973) |
| Chamaeleonidae | <i>Bradypodion ventrale</i>       | 0 | Camp (1923); Smith (1935); Estes et al. (1988); Jullien and Renous-Lécure (1972,1973) |
| Chamaeleonidae | <i>Brookesia ambreensis</i>       | 0 | Camp (1923); Smith (1935); Estes et al. (1988); Jullien and Renous-Lécure (1972,1973) |
| Chamaeleonidae | <i>Brookesia antakarana</i>       | 0 | Camp (1923); Smith (1935); Estes et al. (1988); Jullien and Renous-Lécure (1972,1973) |
| Chamaeleonidae | <i>Brookesia betschi</i>          | 0 | Camp (1923); Smith (1935); Estes et al. (1988); Jullien and Renous-Lécure (1972,1973) |
| Chamaeleonidae | <i>Brookesia bonsi</i>            | 0 | Camp (1923); Smith (1935); Estes et al. (1988); Jullien and Renous-Lécure (1972,1973) |
| Chamaeleonidae | <i>Brookesia brygooi</i>          | 0 | Camp (1923); Smith (1935); Estes et al. (1988); Jullien and Renous-Lécure (1972,1973) |
| Chamaeleonidae | <i>Brookesia decaryi</i>          | 0 | Camp (1923); Smith (1935); Estes et al. (1988); Jullien and Renous-Lécure (1972,1973) |
| Chamaeleonidae | <i>Brookesia dentata</i>          | 0 | Camp (1923); Smith (1935); Estes et al. (1988); Jullien and Renous-Lécure (1972,1973) |
| Chamaeleonidae | <i>Brookesia ebenau</i>           | 0 | Camp (1923); Smith (1935); Estes et al. (1988); Jullien and Renous-Lécure (1972,1973) |
| Chamaeleonidae | <i>Brookesia exarmata</i>         | 0 | Camp (1923); Smith (1935); Estes et al. (1988); Jullien and Renous-Lécure (1972,1973) |
| Chamaeleonidae | <i>Brookesia griveaudi</i>        | 0 | Camp (1923); Smith (1935); Estes et al. (1988); Jullien and Renous-Lécure (1972,1973) |
| Chamaeleonidae | <i>Brookesia karchei</i>          | 0 | Camp (1923); Smith (1935); Estes et al. (1988); Jullien and Renous-Lécure (1972,1973) |
| Chamaeleonidae | <i>Brookesia lineata</i>          | 0 | Camp (1923); Smith (1935); Estes et al. (1988); Jullien and Renous-Lécure (1972,1973) |
| Chamaeleonidae | <i>Brookesia lolontany</i>        | 0 | Camp (1923); Smith (1935); Estes et al. (1988); Jullien and Renous-Lécure (1972,1973) |
| Chamaeleonidae | <i>Brookesia minima</i>           | 0 | Camp (1923); Smith (1935); Estes et al. (1988); Jullien and Renous-Lécure (1972,1973) |
| Chamaeleonidae | <i>Brookesia nasus</i>            | 0 | Camp (1923); Smith (1935); Estes et al. (1988); Jullien and Renous-Lécure (1972,1973) |
| Chamaeleonidae | <i>Brookesia perarmata</i>        | 0 | Camp (1923); Smith (1935); Estes et al. (1988); Jullien and Renous-Lécure (1972,1973) |
| Chamaeleonidae | <i>Brookesia peyrierasi</i>       | 0 | Camp (1923); Smith (1935); Estes et al. (1988); Jullien and Renous-Lécure (1972,1973) |
| Chamaeleonidae | <i>Brookesia stumpffi</i>         | 0 | Camp (1923); Smith (1935); Estes et al. (1988); Jullien and Renous-Lécure (1972,1973) |
| Chamaeleonidae | <i>Brookesia superciliaris</i>    | 0 | Camp (1923); Smith (1935); Estes et al. (1988); Jullien and Renous-Lécure (1972,1973) |
| Chamaeleonidae | <i>Brookesia</i>                  | 0 | Camp (1923); Smith (1935); Estes et al. (1988); Jullien                               |

|                |                                 |   |                                                                                       |
|----------------|---------------------------------|---|---------------------------------------------------------------------------------------|
|                | <i>therezieni</i>               |   | and Renous-Lécure (1972,1973)                                                         |
| Chamaeleonidae | <i>Brookesia thieli</i>         | 0 | Camp (1923); Smith (1935); Estes et al. (1988); Jullien and Renous-Lécure (1972,1973) |
| Chamaeleonidae | <i>Brookesia tuberculata</i>    | 0 | Camp (1923); Smith (1935); Estes et al. (1988); Jullien and Renous-Lécure (1972,1973) |
| Chamaeleonidae | <i>Brookesia vadoni</i>         | 0 | Camp (1923); Smith (1935); Estes et al. (1988); Jullien and Renous-Lécure (1972,1973) |
| Chamaeleonidae | <i>Brookesia valerieae</i>      | 0 | Camp (1923); Smith (1935); Estes et al. (1988); Jullien and Renous-Lécure (1972,1973) |
| Chamaeleonidae | <i>Calumma boettgeri</i>        | 0 | Camp (1923); Smith (1935); Estes et al. (1988); Jullien and Renous-Lécure (1972,1973) |
| Chamaeleonidae | <i>Calumma brevicorne</i>       | 0 | Camp (1923); Smith (1935); Estes et al. (1988); Jullien and Renous-Lécure (1972,1973) |
| Chamaeleonidae | <i>Calumma capuroni</i>         | 0 | Camp (1923); Smith (1935); Estes et al. (1988); Jullien and Renous-Lécure (1972,1973) |
| Chamaeleonidae | <i>Calumma crypticum</i>        | 0 | Camp (1923); Smith (1935); Estes et al. (1988); Jullien and Renous-Lécure (1972,1973) |
| Chamaeleonidae | <i>Calumma cucullatum</i>       | 0 | Camp (1923); Smith (1935); Estes et al. (1988); Jullien and Renous-Lécure (1972,1973) |
| Chamaeleonidae | <i>Calumma fallax</i>           | 0 | Camp (1923); Smith (1935); Estes et al. (1988); Jullien and Renous-Lécure (1972,1973) |
| Chamaeleonidae | <i>Calumma furcifer</i>         | 0 | Camp (1923); Smith (1935); Estes et al. (1988); Jullien and Renous-Lécure (1972,1973) |
| Chamaeleonidae | <i>Calumma gallus</i>           | 0 | Camp (1923); Smith (1935); Estes et al. (1988); Jullien and Renous-Lécure (1972,1973) |
| Chamaeleonidae | <i>Calumma gastrotaenia</i>     | 0 | Camp (1923); Smith (1935); Estes et al. (1988); Jullien and Renous-Lécure (1972,1973) |
| Chamaeleonidae | <i>Calumma globifer</i>         | 0 | Camp (1923); Smith (1935); Estes et al. (1988); Jullien and Renous-Lécure (1972,1973) |
| Chamaeleonidae | <i>Calumma guibei</i>           | 0 | Camp (1923); Smith (1935); Estes et al. (1988); Jullien and Renous-Lécure (1972,1973) |
| Chamaeleonidae | <i>Calumma hilleniusi</i>       | 0 | Camp (1923); Smith (1935); Estes et al. (1988); Jullien and Renous-Lécure (1972,1973) |
| Chamaeleonidae | <i>Calumma malthe</i>           | 0 | Camp (1923); Smith (1935); Estes et al. (1988); Jullien and Renous-Lécure (1972,1973) |
| Chamaeleonidae | <i>Calumma nasutum</i>          | 0 | Camp (1923); Smith (1935); Estes et al. (1988); Jullien and Renous-Lécure (1972,1973) |
| Chamaeleonidae | <i>Calumma oshaughnessyi</i>    | 0 | Camp (1923); Smith (1935); Estes et al. (1988); Jullien and Renous-Lécure (1972,1973) |
| Chamaeleonidae | <i>Calumma parsonii</i>         | 0 | Camp (1923); Smith (1935); Estes et al. (1988); Jullien and Renous-Lécure (1972,1973) |
| Chamaeleonidae | <i>Calumma tsaratananense</i>   | 0 | Camp (1923); Smith (1935); Estes et al. (1988); Jullien and Renous-Lécure (1972,1973) |
| Chamaeleonidae | <i>Chamaeleo affinis</i>        | 0 | Camp (1923); Smith (1935); Estes et al. (1988); Jullien and Renous-Lécure (1972,1973) |
| Chamaeleonidae | <i>Chamaeleo africanus</i>      | 0 | Camp (1923); Smith (1935); Estes et al. (1988); Jullien and Renous-Lécure (1972,1973) |
| Chamaeleonidae | <i>Chamaeleo arabicus</i>       | 0 | Camp (1923); Smith (1935); Estes et al. (1988); Jullien and Renous-Lécure (1972,1973) |
| Chamaeleonidae | <i>Chamaeleo baleicornutus</i>  | 0 | Camp (1923); Smith (1935); Estes et al. (1988); Jullien and Renous-Lécure (1972,1973) |
| Chamaeleonidae | <i>Chamaeleo bitaeniatus</i>    | 0 | Camp (1923); Smith (1935); Estes et al. (1988); Jullien and Renous-Lécure (1972,1973) |
| Chamaeleonidae | <i>Chamaeleo calcaricarenis</i> | 0 | Camp (1923); Smith (1935); Estes et al. (1988); Jullien and Renous-Lécure (1972,1973) |
| Chamaeleonidae | <i>Chamaeleo calyptratus</i>    | 0 | Camp (1923); Smith (1935); Estes et al. (1988); Jullien and Renous-Lécure (1972,1973) |
| Chamaeleonidae | <i>Chamaeleo chamaeleon</i>     | 0 | Camp (1923); Smith (1935); Estes et al. (1988); Jullien and Renous-Lécure (1972,1973) |

|                |                               |   |                                                                                       |
|----------------|-------------------------------|---|---------------------------------------------------------------------------------------|
| Chamaeleonidae | <i>Chamaeleo cristatus</i>    | 0 | Camp (1923); Smith (1935); Estes et al. (1988); Jullien and Renous-Lécure (1972,1973) |
| Chamaeleonidae | <i>Chamaeleo deremensis</i>   | 0 | Camp (1923); Smith (1935); Estes et al. (1988); Jullien and Renous-Lécure (1972,1973) |
| Chamaeleonidae | <i>Chamaeleo dilepis</i>      | 0 | Camp (1923); Smith (1935); Estes et al. (1988); Jullien and Renous-Lécure (1972,1973) |
| Chamaeleonidae | <i>Chamaeleo elliotti</i>     | 0 | Camp (1923); Smith (1935); Estes et al. (1988); Jullien and Renous-Lécure (1972,1973) |
| Chamaeleonidae | <i>Chamaeleo feae</i>         | 0 | Camp (1923); Smith (1935); Estes et al. (1988); Jullien and Renous-Lécure (1972,1973) |
| Chamaeleonidae | <i>Chamaeleo fuelleborni</i>  | 0 | Camp (1923); Smith (1935); Estes et al. (1988); Jullien and Renous-Lécure (1972,1973) |
| Chamaeleonidae | <i>Chamaeleo goetzei</i>      | 0 | Camp (1923); Smith (1935); Estes et al. (1988); Jullien and Renous-Lécure (1972,1973) |
| Chamaeleonidae | <i>Chamaeleo gracilis</i>     | 0 | Camp (1923); Smith (1935); Estes et al. (1988); Jullien and Renous-Lécure (1972,1973) |
| Chamaeleonidae | <i>Chamaeleo harenae</i>      | 0 | Camp (1923); Smith (1935); Estes et al. (1988); Jullien and Renous-Lécure (1972,1973) |
| Chamaeleonidae | <i>Chamaeleo hoehnelii</i>    | 0 | Camp (1923); Smith (1935); Estes et al. (1988); Jullien and Renous-Lécure (1972,1973) |
| Chamaeleonidae | <i>Chamaeleo jacksonii</i>    | 0 | Camp (1923); Smith (1935); Estes et al. (1988); Jullien and Renous-Lécure (1972,1973) |
| Chamaeleonidae | <i>Chamaeleo johnstoni</i>    | 0 | Camp (1923); Smith (1935); Estes et al. (1988); Jullien and Renous-Lécure (1972,1973) |
| Chamaeleonidae | <i>Chamaeleo laevigatus</i>   | 0 | Camp (1923); Smith (1935); Estes et al. (1988); Jullien and Renous-Lécure (1972,1973) |
| Chamaeleonidae | <i>Chamaeleo melleri</i>      | 0 | Camp (1923); Smith (1935); Estes et al. (1988); Jullien and Renous-Lécure (1972,1973) |
| Chamaeleonidae | <i>Chamaeleo monachus</i>     | 0 | Camp (1923); Smith (1935); Estes et al. (1988); Jullien and Renous-Lécure (1972,1973) |
| Chamaeleonidae | <i>Chamaeleo montium</i>      | 0 | Camp (1923); Smith (1935); Estes et al. (1988); Jullien and Renous-Lécure (1972,1973) |
| Chamaeleonidae | <i>Chamaeleo namaquensis</i>  | 0 | Camp (1923); Smith (1935); Estes et al. (1988); Jullien and Renous-Lécure (1972,1973) |
| Chamaeleonidae | <i>Chamaeleo narraioaca</i>   | 0 | Camp (1923); Smith (1935); Estes et al. (1988); Jullien and Renous-Lécure (1972,1973) |
| Chamaeleonidae | <i>Chamaeleo necasi</i>       | 0 | Camp (1923); Smith (1935); Estes et al. (1988); Jullien and Renous-Lécure (1972,1973) |
| Chamaeleonidae | <i>Chamaeleo oweni</i>        | 0 | Camp (1923); Smith (1935); Estes et al. (1988); Jullien and Renous-Lécure (1972,1973) |
| Chamaeleonidae | <i>Chamaeleo pfefferi</i>     | 0 | Camp (1923); Smith (1935); Estes et al. (1988); Jullien and Renous-Lécure (1972,1973) |
| Chamaeleonidae | <i>Chamaeleo quadricornis</i> | 0 | Camp (1923); Smith (1935); Estes et al. (1988); Jullien and Renous-Lécure (1972,1973) |
| Chamaeleonidae | <i>Chamaeleo quilensis</i>    | 0 | Camp (1923); Smith (1935); Estes et al. (1988); Jullien and Renous-Lécure (1972,1973) |
| Chamaeleonidae | <i>Chamaeleo roperi</i>       | 0 | Camp (1923); Smith (1935); Estes et al. (1988); Jullien and Renous-Lécure (1972,1973) |
| Chamaeleonidae | <i>Chamaeleo rudis</i>        | 0 | Camp (1923); Smith (1935); Estes et al. (1988); Jullien and Renous-Lécure (1972,1973) |
| Chamaeleonidae | <i>Chamaeleo schubotzi</i>    | 0 | Camp (1923); Smith (1935); Estes et al. (1988); Jullien and Renous-Lécure (1972,1973) |
| Chamaeleonidae | <i>Chamaeleo senegalensis</i> | 0 | Camp (1923); Smith (1935); Estes et al. (1988); Jullien and Renous-Lécure (1972,1973) |
| Chamaeleonidae | <i>Chamaeleo sternfeldi</i>   | 0 | Camp (1923); Smith (1935); Estes et al. (1988); Jullien and Renous-Lécure (1972,1973) |
| Chamaeleonidae | <i>Chamaeleo tempeli</i>      | 0 | Camp (1923); Smith (1935); Estes et al. (1988); Jullien and Renous-Lécure (1972,1973) |
| Chamaeleonidae | <i>Chamaeleo werneri</i>      | 0 | Camp (1923); Smith (1935); Estes et al. (1988); Jullien                               |



|                |                                   |   |                                                                                       |
|----------------|-----------------------------------|---|---------------------------------------------------------------------------------------|
|                |                                   |   | and Renous-Lécure (1972,1973)                                                         |
| Chamaeleonidae | <i>Chamaeleo wiedersheimi</i>     | 0 | Camp (1923); Smith (1935); Estes et al. (1988); Jullien and Renous-Lécure (1972,1973) |
| Chamaeleonidae | <i>Chamaeleo zeylanicus</i>       | 0 | Camp (1923); Smith (1935); Estes et al. (1988); Jullien and Renous-Lécure (1972,1973) |
| Chamaeleonidae | <i>Furcifer angeli</i>            | 0 | Camp (1923); Smith (1935); Estes et al. (1988); Jullien and Renous-Lécure (1972,1973) |
| Chamaeleonidae | <i>Furcifer antimenae</i>         | 0 | Camp (1923); Smith (1935); Estes et al. (1988); Jullien and Renous-Lécure (1972,1973) |
| Chamaeleonidae | <i>Furcifer balteatus</i>         | 0 | Camp (1923); Smith (1935); Estes et al. (1988); Jullien and Renous-Lécure (1972,1973) |
| Chamaeleonidae | <i>Furcifer belalandaensis</i>    | 0 | Camp (1923); Smith (1935); Estes et al. (1988); Jullien and Renous-Lécure (1972,1973) |
| Chamaeleonidae | <i>Furcifer bifidus</i>           | 0 | Camp (1923); Smith (1935); Estes et al. (1988); Jullien and Renous-Lécure (1972,1973) |
| Chamaeleonidae | <i>Furcifer campani</i>           | 0 | Camp (1923); Smith (1935); Estes et al. (1988); Jullien and Renous-Lécure (1972,1973) |
| Chamaeleonidae | <i>Furcifer cephalolepis</i>      | 0 | Camp (1923); Smith (1935); Estes et al. (1988); Jullien and Renous-Lécure (1972,1973) |
| Chamaeleonidae | <i>Furcifer labordi</i>           | 0 | Camp (1923); Smith (1935); Estes et al. (1988); Jullien and Renous-Lécure (1972,1973) |
| Chamaeleonidae | <i>Furcifer lateralis</i>         | 0 | Camp (1923); Smith (1935); Estes et al. (1988); Jullien and Renous-Lécure (1972,1973) |
| Chamaeleonidae | <i>Furcifer minor</i>             | 0 | Camp (1923); Smith (1935); Estes et al. (1988); Jullien and Renous-Lécure (1972,1973) |
| Chamaeleonidae | <i>Furcifer oustaleti</i>         | 0 | Camp (1923); Smith (1935); Estes et al. (1988); Jullien and Renous-Lécure (1972,1973) |
| Chamaeleonidae | <i>Furcifer pardalis</i>          | 0 | Camp (1923); Smith (1935); Estes et al. (1988); Jullien and Renous-Lécure (1972,1973) |
| Chamaeleonidae | <i>Furcifer petteri</i>           | 0 | Camp (1923); Smith (1935); Estes et al. (1988); Jullien and Renous-Lécure (1972,1973) |
| Chamaeleonidae | <i>Furcifer polleni</i>           | 0 | Camp (1923); Smith (1935); Estes et al. (1988); Jullien and Renous-Lécure (1972,1973) |
| Chamaeleonidae | <i>Furcifer verrucosus</i>        | 0 | Camp (1923); Smith (1935); Estes et al. (1988); Jullien and Renous-Lécure (1972,1973) |
| Chamaeleonidae | <i>Furcifer willsii</i>           | 0 | Camp (1923); Smith (1935); Estes et al. (1988); Jullien and Renous-Lécure (1972,1973) |
| Chamaeleonidae | <i>Kinyongia adolfifridgerici</i> | 0 | Camp (1923); Smith (1935); Estes et al. (1988); Jullien and Renous-Lécure (1972,1973) |
| Chamaeleonidae | <i>Kinyongia boehmei</i>          | 0 | Camp (1923); Smith (1935); Estes et al. (1988); Jullien and Renous-Lécure (1972,1973) |
| Chamaeleonidae | <i>Kinyongia carpenteri</i>       | 0 | Camp (1923); Smith (1935); Estes et al. (1988); Jullien and Renous-Lécure (1972,1973) |
| Chamaeleonidae | <i>Kinyongia excubitor</i>        | 0 | Camp (1923); Smith (1935); Estes et al. (1988); Jullien and Renous-Lécure (1972,1973) |
| Chamaeleonidae | <i>Kinyongia fischeri</i>         | 0 | Camp (1923); Smith (1935); Estes et al. (1988); Jullien and Renous-Lécure (1972,1973) |
| Chamaeleonidae | <i>Kinyongia matschiei</i>        | 0 | Camp (1923); Smith (1935); Estes et al. (1988); Jullien and Renous-Lécure (1972,1973) |
| Chamaeleonidae | <i>Kinyongia multituberculata</i> | 0 | Camp (1923); Smith (1935); Estes et al. (1988); Jullien and Renous-Lécure (1972,1973) |
| Chamaeleonidae | <i>Kinyongia oxyrhina</i>         | 0 | Camp (1923); Smith (1935); Estes et al. (1988); Jullien and Renous-Lécure (1972,1973) |
| Chamaeleonidae | <i>Kinyongia tavetana</i>         | 0 | Camp (1923); Smith (1935); Estes et al. (1988); Jullien and Renous-Lécure (1972,1973) |
| Chamaeleonidae | <i>Kinyongia tenue</i>            | 0 | Camp (1923); Smith (1935); Estes et al. (1988); Jullien and Renous-Lécure (1972,1973) |
| Chamaeleonidae | <i>Kinyongia uthmoelleri</i>      | 0 | Camp (1923); Smith (1935); Estes et al. (1988); Jullien and Renous-Lécure (1972,1973) |

|                |                                   |   |                                                                                       |
|----------------|-----------------------------------|---|---------------------------------------------------------------------------------------|
| Chamaeleonidae | <i>Kinyongia vosseleri</i>        | 0 | Camp (1923); Smith (1935); Estes et al. (1988); Jullien and Renous-Lécure (1972,1973) |
| Chamaeleonidae | <i>Kinyongia xenorhina</i>        | 0 | Camp (1923); Smith (1935); Estes et al. (1988); Jullien and Renous-Lécure (1972,1973) |
| Chamaeleonidae | <i>Nadzikambia mlanjense</i>      | 0 | Camp (1923); Smith (1935); Estes et al. (1988); Jullien and Renous-Lécure (1972,1973) |
| Chamaeleonidae | <i>Rhampholeon acuminatus</i>     | 0 | Camp (1923); Smith (1935); Estes et al. (1988); Jullien and Renous-Lécure (1972,1973) |
| Chamaeleonidae | <i>Rhampholeon beraduccii</i>     | 0 | Camp (1923); Smith (1935); Estes et al. (1988); Jullien and Renous-Lécure (1972,1973) |
| Chamaeleonidae | <i>Rhampholeon boulengeri</i>     | 0 | Camp (1923); Smith (1935); Estes et al. (1988); Jullien and Renous-Lécure (1972,1973) |
| Chamaeleonidae | <i>Rhampholeon chapmanorum</i>    | 0 | Camp (1923); Smith (1935); Estes et al. (1988); Jullien and Renous-Lécure (1972,1973) |
| Chamaeleonidae | <i>Rhampholeon marshalli</i>      | 0 | Camp (1923); Smith (1935); Estes et al. (1988); Jullien and Renous-Lécure (1972,1973) |
| Chamaeleonidae | <i>Rhampholeon moyeri</i>         | 0 | Camp (1923); Smith (1935); Estes et al. (1988); Jullien and Renous-Lécure (1972,1973) |
| Chamaeleonidae | <i>Rhampholeon nchisiensis</i>    | 0 | Camp (1923); Smith (1935); Estes et al. (1988); Jullien and Renous-Lécure (1972,1973) |
| Chamaeleonidae | <i>Rhampholeon platyceps</i>      | 0 | Camp (1923); Smith (1935); Estes et al. (1988); Jullien and Renous-Lécure (1972,1973) |
| Chamaeleonidae | <i>Rhampholeon spectrum</i>       | 0 | Camp (1923); Smith (1935); Estes et al. (1988); Jullien and Renous-Lécure (1972,1973) |
| Chamaeleonidae | <i>Rhampholeon spinosus</i>       | 0 | Camp (1923); Smith (1935); Estes et al. (1988); Jullien and Renous-Lécure (1972,1973) |
| Chamaeleonidae | <i>Rhampholeon temporalis</i>     | 0 | Camp (1923); Smith (1935); Estes et al. (1988); Jullien and Renous-Lécure (1972,1973) |
| Chamaeleonidae | <i>Rhampholeon uluguruensis</i>   | 0 | Camp (1923); Smith (1935); Estes et al. (1988); Jullien and Renous-Lécure (1972,1973) |
| Chamaeleonidae | <i>Rhampholeon viridis</i>        | 0 | Camp (1923); Smith (1935); Estes et al. (1988); Jullien and Renous-Lécure (1972,1973) |
| Chamaeleonidae | <i>Rieppeleon brachyurus</i>      | 0 | Camp (1923); Smith (1935); Estes et al. (1988); Jullien and Renous-Lécure (1972,1973) |
| Chamaeleonidae | <i>Rieppeleon breviceaudatus</i>  | 0 | Camp (1923); Smith (1935); Estes et al. (1988); Jullien and Renous-Lécure (1972,1973) |
| Chamaeleonidae | <i>Rieppeleon kerstenii</i>       | 0 | Camp (1923); Smith (1935); Estes et al. (1988); Jullien and Renous-Lécure (1972,1973) |
| Cordylidae     | <i>Chamaesaura aenea</i>          | 1 | Stanley et al. (2011)                                                                 |
| Cordylidae     | <i>Chamaesaura anguina</i>        | 1 | Stanley et al. (2011)                                                                 |
| Cordylidae     | <i>Cordylus aridus</i>            | 1 | Stanley et al. (2011)                                                                 |
| Cordylidae     | <i>Cordylus beraduccii</i>        | 1 | Stanley et al. (2011)                                                                 |
| Cordylidae     | <i>Cordylus campbelli</i>         | 1 | Stanley et al. (2011)                                                                 |
| Cordylidae     | <i>Cordylus capensis</i>          | 1 | Stanley et al. (2011)                                                                 |
| Cordylidae     | <i>Cordylus cataphractus</i>      | 1 | Stanley et al. (2011)                                                                 |
| Cordylidae     | <i>Cordylus coeruleopunctatus</i> | 1 | Stanley et al. (2011)                                                                 |
| Cordylidae     | <i>Cordylus cordylus</i>          | 1 | Stanley et al. (2011)                                                                 |
| Cordylidae     | <i>Cordylus giganteus</i>         | 1 | Stanley et al. (2011)                                                                 |
| Cordylidae     | <i>Cordylus imkeae</i>            | 1 | Stanley et al. (2011)                                                                 |
| Cordylidae     | <i>Cordylus jonesii</i>           | 1 | Stanley et al. (2011)                                                                 |
| Cordylidae     | <i>Cordylus jordani</i>           | 1 | Stanley et al. (2011)                                                                 |
| Cordylidae     | <i>Cordylus langi</i>             | 1 | Bates (2007); Stanley et al. (2011)                                                   |

|                |                                  |   |                                                                             |
|----------------|----------------------------------|---|-----------------------------------------------------------------------------|
| Cordylidae     | <i>Cordylus lawrenci</i>         | 1 | Stanley et al. (2011)                                                       |
| Cordylidae     | <i>Cordylus macropholis</i>      | 1 | Stanley et al. (2011)                                                       |
| Cordylidae     | <i>Cordylus mclachlani</i>       | 1 | Stanley et al. (2011)                                                       |
| Cordylidae     | <i>Cordylus meculae</i>          | 1 | Stanley et al. (2011)                                                       |
| Cordylidae     | <i>Cordylus melanotus</i>        | 1 | Stanley et al. (2011)                                                       |
| Cordylidae     | <i>Cordylus microlepidotus</i>   | 1 | Stanley et al. (2011)                                                       |
| Cordylidae     | <i>Cordylus minor</i>            | 1 | Stanley et al. (2011)                                                       |
| Cordylidae     | <i>Cordylus namaquensis</i>      | 1 | Stanley et al. (2011)                                                       |
| Cordylidae     | <i>Cordylus nebulosus</i>        | 1 | Stanley et al. (2011)                                                       |
| Cordylidae     | <i>Cordylus niger</i>            | 1 | Stanley et al. (2011)                                                       |
| Cordylidae     | <i>Cordylus oelofseni</i>        | 1 | Stanley et al. (2011)                                                       |
| Cordylidae     | <i>Cordylus peersi</i>           | 1 | Stanley et al. (2011)                                                       |
| Cordylidae     | <i>Cordylus polyzonus</i>        | 1 | Stanley et al. (2011)                                                       |
| Cordylidae     | <i>Cordylus pustulatus</i>       | 1 | Stanley et al. (2011)                                                       |
| Cordylidae     | <i>Cordylus rhodesianus</i>      | 1 | Stanley et al. (2011)                                                       |
| Cordylidae     | <i>Cordylus spinosus</i>         | 1 | Stanley et al. (2011)                                                       |
| Cordylidae     | <i>Cordylus tasmani</i>          | 1 | Stanley et al. (2011)                                                       |
| Cordylidae     | <i>Cordylus tropidosternum</i>   | 1 | Stanley et al. (2011)                                                       |
| Cordylidae     | <i>Cordylus ukingensis</i>       | 1 | Stanley et al. (2011)                                                       |
| Cordylidae     | <i>Cordylus vittifer</i>         | 1 | Stanley et al. (2011)                                                       |
| Cordylidae     | <i>Cordylus warreni</i>          | 1 | Stanley et al. (2011)                                                       |
| Cordylidae     | <i>Platysaurus broadleyi</i>     | 1 | Stanley et al. (2011)                                                       |
| Cordylidae     | <i>Platysaurus capensis</i>      | 1 | Stanley et al. (2011)                                                       |
| Cordylidae     | <i>Platysaurus intermedius</i>   | 1 | Stanley et al. (2011)                                                       |
| Cordylidae     | <i>Platysaurus minor</i>         | 1 | Stanley et al. (2011)                                                       |
| Cordylidae     | <i>Platysaurus mitchelli</i>     | 1 | Stanley et al. (2011)                                                       |
| Cordylidae     | <i>Platysaurus monotropis</i>    | 1 | Stanley et al. (2011)                                                       |
| Cordylidae     | <i>Platysaurus pungweensis</i>   | 1 | Stanley et al. (2011)                                                       |
| Corytophanidae | <i>Basiliscus basiliscus</i>     | 0 | Boulenger (1885); Etheridge and de Quieroz (1988); Vitt and Caldwell (2014) |
| Corytophanidae | <i>Basiliscus galeritus</i>      | 0 | Boulenger (1885); Etheridge and de Quieroz (1988); Vitt and Caldwell (2014) |
| Corytophanidae | <i>Basiliscus plumifrons</i>     | 0 | Boulenger (1885); Etheridge and de Quieroz (1988); Vitt and Caldwell (2014) |
| Corytophanidae | <i>Basiliscus vittatus</i>       | 0 | Boulenger (1885); Etheridge and de Quieroz (1988); Vitt and Caldwell (2014) |
| Corytophanidae | <i>Corytophanes cristatus</i>    | 0 | Boulenger (1885); Etheridge and de Quieroz (1988); Vitt and Caldwell (2014) |
| Corytophanidae | <i>Corytophanes percarinatus</i> | 0 | Boulenger (1885); Etheridge and de Quieroz (1988); Vitt and Caldwell (2014) |
| Corytophanidae | <i>Laemancus longipes</i>        | 0 | Boulenger (1885); Etheridge and de Quieroz (1988); Vitt and Caldwell (2014) |

|               |                                |   |                                             |
|---------------|--------------------------------|---|---------------------------------------------|
| Crotaphytidae | <i>Callisaurus draconoides</i> | 1 | Vitt and Caldwell (2014)                    |
| Crotaphytidae | <i>Cophosaurus texanus</i>     | 1 | Vitt and Caldwell (2014)                    |
| Crotaphytidae | <i>Crotaphytus antiquus</i>    | 0 | Vitt and Caldwell (2014)                    |
| Crotaphytidae | <i>Crotaphytus bicinctores</i> | 0 | Vitt and Caldwell (2014)                    |
| Crotaphytidae | <i>Crotaphytus collaris</i>    | 0 | Vitt and Caldwell (2014)                    |
| Crotaphytidae | <i>Crotaphytus griseus</i>     | 0 | Vitt and Caldwell (2014)                    |
| Crotaphytidae | <i>Crotaphytus insularis</i>   | 0 | Vitt and Caldwell (2014)                    |
| Crotaphytidae | <i>Crotaphytus nebrius</i>     | 0 | Vitt and Caldwell (2014)                    |
| Crotaphytidae | <i>Crotaphytus reticulatus</i> | 0 | Vitt and Caldwell (2014)                    |
| Crotaphytidae | <i>Crotaphytus vestigium</i>   | 0 | Vitt and Caldwell (2014)                    |
| Crotaphytidae | <i>Gambelia copeii</i>         | 0 | Vitt and Caldwell (2014)                    |
| Crotaphytidae | <i>Gambelia sila</i>           | 0 | Vitt and Caldwell (2014)                    |
| Crotaphytidae | <i>Gambelia wislizenii</i>     | 0 | Vitt and Caldwell (2014)                    |
| Crotaphytidae | <i>Holbrookia lacerata</i>     | 1 | Vitt and Caldwell (2014)                    |
| Crotaphytidae | <i>Holbrookia maculata</i>     | 1 | Vitt and Caldwell (2014)                    |
| Crotaphytidae | <i>Holbrookia propinqua</i>    | 1 | Vitt and Caldwell (2014)                    |
| Dactyloidae   | <i>Anolis acutus</i>           | 0 | Aliva-Pires (1996); Nicholson et al. (2012) |
| Dactyloidae   | <i>Anolis aeneus</i>           | 0 | Aliva-Pires (1996); Nicholson et al. (2012) |
| Dactyloidae   | <i>Anolis aequatorialis</i>    | 0 | Aliva-Pires (1996); Nicholson et al. (2012) |
| Dactyloidae   | <i>Anolis agassizi</i>         | 0 | Aliva-Pires (1996); Nicholson et al. (2012) |
| Dactyloidae   | <i>Anolis ahli</i>             | 0 | Aliva-Pires (1996); Nicholson et al. (2012) |
| Dactyloidae   | <i>Anolis alayoni</i>          | 0 | Aliva-Pires (1996); Nicholson et al. (2012) |
| Dactyloidae   | <i>Anolis alfaroi</i>          | 0 | Aliva-Pires (1996); Nicholson et al. (2012) |
| Dactyloidae   | <i>Anolis aliniger</i>         | 0 | Aliva-Pires (1996); Nicholson et al. (2012) |
| Dactyloidae   | <i>Anolis allisoni</i>         | 0 | Aliva-Pires (1996); Nicholson et al. (2012) |
| Dactyloidae   | <i>Anolis allogus</i>          | 0 | Aliva-Pires (1996); Nicholson et al. (2012) |
| Dactyloidae   | <i>Anolis altae</i>            | 0 | Aliva-Pires (1996); Nicholson et al. (2012) |
| Dactyloidae   | <i>Anolis alumina</i>          | 0 | Aliva-Pires (1996); Nicholson et al. (2012) |
| Dactyloidae   | <i>Anolis alutaceus</i>        | 0 | Aliva-Pires (1996); Nicholson et al. (2012) |
| Dactyloidae   | <i>Anolis anatoloros</i>       | 0 | Aliva-Pires (1996); Nicholson et al. (2012) |
| Dactyloidae   | <i>Anolis angusticeps</i>      | 0 | Aliva-Pires (1996); Nicholson et al. (2012) |
| Dactyloidae   | <i>Anolis annectens</i>        | 0 | Aliva-Pires (1996); Nicholson et al. (2012) |
| Dactyloidae   | <i>Anolis aquaticus</i>        | 0 | Aliva-Pires (1996); Nicholson et al. (2012) |
| Dactyloidae   | <i>Anolis argenteolus</i>      | 0 | Aliva-Pires (1996); Nicholson et al. (2012) |
| Dactyloidae   | <i>Anolis argillaceus</i>      | 0 | Aliva-Pires (1996); Nicholson et al. (2012) |
| Dactyloidae   | <i>Anolis armouri</i>          | 0 | Aliva-Pires (1996); Nicholson et al. (2012) |
| Dactyloidae   | <i>Anolis auratus</i>          | 0 | Aliva-Pires (1996); Nicholson et al. (2012) |
| Dactyloidae   | <i>Anolis bahorucoensis</i>    | 0 | Aliva-Pires (1996); Nicholson et al. (2012) |

|             |                              |   |                                             |
|-------------|------------------------------|---|---------------------------------------------|
| Dactyloidae | <i>Anolis baleatus</i>       | 0 | Aliva-Pires (1996); Nicholson et al. (2012) |
| Dactyloidae | <i>Anolis baracoae</i>       | 0 | Aliva-Pires (1996); Nicholson et al. (2012) |
| Dactyloidae | <i>Anolis barahonae</i>      | 0 | Aliva-Pires (1996); Nicholson et al. (2012) |
| Dactyloidae | <i>Anolis barbatus</i>       | 0 | Aliva-Pires (1996); Nicholson et al. (2012) |
| Dactyloidae | <i>Anolis barbouri</i>       | 0 | Aliva-Pires (1996); Nicholson et al. (2012) |
| Dactyloidae | <i>Anolis bartschi</i>       | 0 | Aliva-Pires (1996); Nicholson et al. (2012) |
| Dactyloidae | <i>Anolis bicaorum</i>       | 0 | Aliva-Pires (1996); Nicholson et al. (2012) |
| Dactyloidae | <i>Anolis bimaculatus</i>    | 0 | Aliva-Pires (1996); Nicholson et al. (2012) |
| Dactyloidae | <i>Anolis biporcatus</i>     | 0 | Aliva-Pires (1996); Nicholson et al. (2012) |
| Dactyloidae | <i>Anolis bitectus</i>       | 0 | Aliva-Pires (1996); Nicholson et al. (2012) |
| Dactyloidae | <i>Anolis boettgeri</i>      | 0 | Aliva-Pires (1996); Nicholson et al. (2012) |
| Dactyloidae | <i>Anolis bombiceps</i>      | 0 | Aliva-Pires (1996); Nicholson et al. (2012) |
| Dactyloidae | <i>Anolis bonairensis</i>    | 0 | Aliva-Pires (1996); Nicholson et al. (2012) |
| Dactyloidae | <i>Anolis bremeri</i>        | 0 | Aliva-Pires (1996); Nicholson et al. (2012) |
| Dactyloidae | <i>Anolis brevirostris</i>   | 0 | Aliva-Pires (1996); Nicholson et al. (2012) |
| Dactyloidae | <i>Anolis brunneus</i>       | 0 | Aliva-Pires (1996); Nicholson et al. (2012) |
| Dactyloidae | <i>Anolis calimae</i>        | 0 | Aliva-Pires (1996); Nicholson et al. (2012) |
| Dactyloidae | <i>Anolis capito</i>         | 0 | Aliva-Pires (1996); Nicholson et al. (2012) |
| Dactyloidae | <i>Anolis carolinensis</i>   | 0 | Aliva-Pires (1996); Nicholson et al. (2012) |
| Dactyloidae | <i>Anolis carpenteri</i>     | 0 | Aliva-Pires (1996); Nicholson et al. (2012) |
| Dactyloidae | <i>Anolis casildae</i>       | 0 | Aliva-Pires (1996); Nicholson et al. (2012) |
| Dactyloidae | <i>Anolis caudalis</i>       | 0 | Aliva-Pires (1996); Nicholson et al. (2012) |
| Dactyloidae | <i>Anolis centralis</i>      | 0 | Aliva-Pires (1996); Nicholson et al. (2012) |
| Dactyloidae | <i>Anolis chamaeleonides</i> | 0 | Aliva-Pires (1996); Nicholson et al. (2012) |
| Dactyloidae | <i>Anolis chloris</i>        | 0 | Aliva-Pires (1996); Nicholson et al. (2012) |
| Dactyloidae | <i>Anolis chlorocyanus</i>   | 0 | Aliva-Pires (1996); Nicholson et al. (2012) |
| Dactyloidae | <i>Anolis chocorum</i>       | 0 | Aliva-Pires (1996); Nicholson et al. (2012) |
| Dactyloidae | <i>Anolis christophei</i>    | 0 | Aliva-Pires (1996); Nicholson et al. (2012) |
| Dactyloidae | <i>Anolis chrysolepis</i>    | 0 | Aliva-Pires (1996); Nicholson et al. (2012) |
| Dactyloidae | <i>Anolis clivicola</i>      | 0 | Aliva-Pires (1996); Nicholson et al. (2012) |
| Dactyloidae | <i>Anolis coelestinus</i>    | 0 | Aliva-Pires (1996); Nicholson et al. (2012) |
| Dactyloidae | <i>Anolis confusus</i>       | 0 | Aliva-Pires (1996); Nicholson et al. (2012) |
| Dactyloidae | <i>Anolis conspersus</i>     | 0 | Aliva-Pires (1996); Nicholson et al. (2012) |
| Dactyloidae | <i>Anolis cooki</i>          | 0 | Aliva-Pires (1996); Nicholson et al. (2012) |
| Dactyloidae | <i>Anolis crassulus</i>      | 0 | Aliva-Pires (1996); Nicholson et al. (2012) |
| Dactyloidae | <i>Anolis cristatellus</i>   | 0 | Aliva-Pires (1996); Nicholson et al. (2012) |
| Dactyloidae | <i>Anolis cupeyalensis</i>   | 0 | Aliva-Pires (1996); Nicholson et al. (2012) |
| Dactyloidae | <i>Anolis cupreus</i>        | 0 | Aliva-Pires (1996); Nicholson et al. (2012) |
| Dactyloidae | <i>Anolis cuvieri</i>        | 0 | Aliva-Pires (1996); Nicholson et al. (2012) |
| Dactyloidae | <i>Anolis cyanopleurus</i>   | 0 | Aliva-Pires (1996); Nicholson et al. (2012) |
| Dactyloidae | <i>Anolis cybotes</i>        | 0 | Aliva-Pires (1996); Nicholson et al. (2012) |
| Dactyloidae | <i>Anolis danieli</i>        | 0 | Aliva-Pires (1996); Nicholson et al. (2012) |
| Dactyloidae | <i>Anolis darlingtoni</i>    | 0 | Aliva-Pires (1996); Nicholson et al. (2012) |
| Dactyloidae | <i>Anolis desechensis</i>    | 0 | Aliva-Pires (1996); Nicholson et al. (2012) |

|             |                               |   |                                             |
|-------------|-------------------------------|---|---------------------------------------------|
| Dactyloidae | <i>Anolis distichus</i>       | 0 | Aliva-Pires (1996); Nicholson et al. (2012) |
| Dactyloidae | <i>Anolis dolichocephalus</i> | 0 | Aliva-Pires (1996); Nicholson et al. (2012) |
| Dactyloidae | <i>Anolis equestris</i>       | 0 | Aliva-Pires (1996); Nicholson et al. (2012) |
| Dactyloidae | <i>Anolis ernestwilliamsi</i> | 0 | Aliva-Pires (1996); Nicholson et al. (2012) |
| Dactyloidae | <i>Anolis etheridgei</i>      | 0 | Aliva-Pires (1996); Nicholson et al. (2012) |
| Dactyloidae | <i>Anolis eugeneagrahami</i>  | 0 | Aliva-Pires (1996); Nicholson et al. (2012) |
| Dactyloidae | <i>Anolis euskalerriari</i>   | 0 | Aliva-Pires (1996); Nicholson et al. (2012) |
| Dactyloidae | <i>Anolis evermanni</i>       | 0 | Aliva-Pires (1996); Nicholson et al. (2012) |
| Dactyloidae | <i>Anolis extremus</i>        | 0 | Aliva-Pires (1996); Nicholson et al. (2012) |
| Dactyloidae | <i>Anolis ferreus</i>         | 0 | Aliva-Pires (1996); Nicholson et al. (2012) |
| Dactyloidae | <i>Anolis festae</i>          | 0 | Aliva-Pires (1996); Nicholson et al. (2012) |
| Dactyloidae | <i>Anolis fitchi</i>          | 0 | Aliva-Pires (1996); Nicholson et al. (2012) |
| Dactyloidae | <i>Anolis fowleri</i>         | 0 | Aliva-Pires (1996); Nicholson et al. (2012) |
| Dactyloidae | <i>Anolis fraseri</i>         | 0 | Aliva-Pires (1996); Nicholson et al. (2012) |
| Dactyloidae | <i>Anolis frenatus</i>        | 0 | Aliva-Pires (1996); Nicholson et al. (2012) |
| Dactyloidae | <i>Anolis fuscoauratus</i>    | 0 | Aliva-Pires (1996); Nicholson et al. (2012) |
| Dactyloidae | <i>Anolis garmani</i>         | 0 | Aliva-Pires (1996); Nicholson et al. (2012) |
| Dactyloidae | <i>Anolis garridoi</i>        | 0 | Aliva-Pires (1996); Nicholson et al. (2012) |
| Dactyloidae | <i>Anolis gemmosus</i>        | 0 | Aliva-Pires (1996); Nicholson et al. (2012) |
| Dactyloidae | <i>Anolis gingivinus</i>      | 0 | Aliva-Pires (1996); Nicholson et al. (2012) |
| Dactyloidae | <i>Anolis grahami</i>         | 0 | Aliva-Pires (1996); Nicholson et al. (2012) |
| Dactyloidae | <i>Anolis griseus</i>         | 0 | Aliva-Pires (1996); Nicholson et al. (2012) |
| Dactyloidae | <i>Anolis guafe</i>           | 0 | Aliva-Pires (1996); Nicholson et al. (2012) |
| Dactyloidae | <i>Anolis guamuhaya</i>       | 0 | Aliva-Pires (1996); Nicholson et al. (2012) |
| Dactyloidae | <i>Anolis guazuma</i>         | 0 | Aliva-Pires (1996); Nicholson et al. (2012) |
| Dactyloidae | <i>Anolis gundlachi</i>       | 0 | Aliva-Pires (1996); Nicholson et al. (2012) |
| Dactyloidae | <i>Anolis haetianus</i>       | 0 | Aliva-Pires (1996); Nicholson et al. (2012) |
| Dactyloidae | <i>Anolis hendersoni</i>      | 0 | Aliva-Pires (1996); Nicholson et al. (2012) |
| Dactyloidae | <i>Anolis heterodermus</i>    | 0 | Aliva-Pires (1996); Nicholson et al. (2012) |
| Dactyloidae | <i>Anolis homolechis</i>      | 0 | Aliva-Pires (1996); Nicholson et al. (2012) |
| Dactyloidae | <i>Anolis huilae</i>          | 0 | Aliva-Pires (1996); Nicholson et al. (2012) |
| Dactyloidae | <i>Anolis humilis</i>         | 0 | Aliva-Pires (1996); Nicholson et al. (2012) |
| Dactyloidae | <i>Anolis imias</i>           | 0 | Aliva-Pires (1996); Nicholson et al. (2012) |
| Dactyloidae | <i>Anolis inderenae</i>       | 0 | Aliva-Pires (1996); Nicholson et al. (2012) |
| Dactyloidae | <i>Anolis inexpectatus</i>    | 0 | Aliva-Pires (1996); Nicholson et al. (2012) |
| Dactyloidae | <i>Anolis insignis</i>        | 0 | Aliva-Pires (1996); Nicholson et al. (2012) |
| Dactyloidae | <i>Anolis insolitus</i>       | 0 | Aliva-Pires (1996); Nicholson et al. (2012) |
| Dactyloidae | <i>Anolis intermedius</i>     | 0 | Aliva-Pires (1996); Nicholson et al. (2012) |
| Dactyloidae | <i>Anolis isolepis</i>        | 0 | Aliva-Pires (1996); Nicholson et al. (2012) |
| Dactyloidae | <i>Anolis isthmicus</i>       | 0 | Aliva-Pires (1996); Nicholson et al. (2012) |
| Dactyloidae | <i>Anolis jacare</i>          | 0 | Aliva-Pires (1996); Nicholson et al. (2012) |
| Dactyloidae | <i>Anolis jubar</i>           | 0 | Aliva-Pires (1996); Nicholson et al. (2012) |
| Dactyloidae | <i>Anolis kemptoni</i>        | 0 | Aliva-Pires (1996); Nicholson et al. (2012) |

|             |                                |   |                                             |
|-------------|--------------------------------|---|---------------------------------------------|
| Dactyloidae | <i>Anolis krugi</i>            | 0 | Aliva-Pires (1996); Nicholson et al. (2012) |
| Dactyloidae | <i>Anolis laevis</i>           | 0 | Aliva-Pires (1996); Nicholson et al. (2012) |
| Dactyloidae | <i>Anolis leachii</i>          | 0 | Aliva-Pires (1996); Nicholson et al. (2012) |
| Dactyloidae | <i>Anolis lemurinus</i>        | 0 | Aliva-Pires (1996); Nicholson et al. (2012) |
| Dactyloidae | <i>Anolis limifrons</i>        | 0 | Aliva-Pires (1996); Nicholson et al. (2012) |
| Dactyloidae | <i>Anolis lineatopus</i>       | 0 | Aliva-Pires (1996); Nicholson et al. (2012) |
| Dactyloidae | <i>Anolis lineatus</i>         | 0 | Aliva-Pires (1996); Nicholson et al. (2012) |
| Dactyloidae | <i>Anolis lionotus</i>         | 0 | Aliva-Pires (1996); Nicholson et al. (2012) |
| Dactyloidae | <i>Anolis lividus</i>          | 0 | Aliva-Pires (1996); Nicholson et al. (2012) |
| Dactyloidae | <i>Anolis longiceps</i>        | 0 | Aliva-Pires (1996); Nicholson et al. (2012) |
| Dactyloidae | <i>Anolis longitibialis</i>    | 0 | Aliva-Pires (1996); Nicholson et al. (2012) |
| Dactyloidae | <i>Anolis loveridgei</i>       | 0 | Aliva-Pires (1996); Nicholson et al. (2012) |
| Dactyloidae | <i>Anolis loysiana</i>         | 0 | Aliva-Pires (1996); Nicholson et al. (2012) |
| Dactyloidae | <i>Anolis luciae</i>           | 0 | Aliva-Pires (1996); Nicholson et al. (2012) |
| Dactyloidae | <i>Anolis lucius</i>           | 0 | Aliva-Pires (1996); Nicholson et al. (2012) |
| Dactyloidae | <i>Anolis luteogularis</i>     | 0 | Aliva-Pires (1996); Nicholson et al. (2012) |
| Dactyloidae | <i>Anolis macilentus</i>       | 0 | Aliva-Pires (1996); Nicholson et al. (2012) |
| Dactyloidae | <i>Anolis maculigula</i>       | 0 | Aliva-Pires (1996); Nicholson et al. (2012) |
| Dactyloidae | <i>Anolis marcanoii</i>        | 0 | Aliva-Pires (1996); Nicholson et al. (2012) |
| Dactyloidae | <i>Anolis marmoratus</i>       | 0 | Aliva-Pires (1996); Nicholson et al. (2012) |
| Dactyloidae | <i>Anolis marron</i>           | 0 | Aliva-Pires (1996); Nicholson et al. (2012) |
| Dactyloidae | <i>Anolis maynardi</i>         | 0 | Aliva-Pires (1996); Nicholson et al. (2012) |
| Dactyloidae | <i>Anolis meridionalis</i>     | 0 | Aliva-Pires (1996); Nicholson et al. (2012) |
| Dactyloidae | <i>Anolis mestrei</i>          | 0 | Aliva-Pires (1996); Nicholson et al. (2012) |
| Dactyloidae | <i>Anolis microtus</i>         | 0 | Aliva-Pires (1996); Nicholson et al. (2012) |
| Dactyloidae | <i>Anolis monensis</i>         | 0 | Aliva-Pires (1996); Nicholson et al. (2012) |
| Dactyloidae | <i>Anolis monticola</i>        | 0 | Aliva-Pires (1996); Nicholson et al. (2012) |
| Dactyloidae | <i>Anolis neblininus</i>       | 0 | Aliva-Pires (1996); Nicholson et al. (2012) |
| Dactyloidae | <i>Anolis nicefori</i>         | 0 | Aliva-Pires (1996); Nicholson et al. (2012) |
| Dactyloidae | <i>Anolis nitens</i>           | 0 | Aliva-Pires (1996); Nicholson et al. (2012) |
| Dactyloidae | <i>Anolis noblei</i>           | 0 | Aliva-Pires (1996); Nicholson et al. (2012) |
| Dactyloidae | <i>Anolis nubilis</i>          | 0 | Aliva-Pires (1996); Nicholson et al. (2012) |
| Dactyloidae | <i>Anolis occultus</i>         | 0 | Aliva-Pires (1996); Nicholson et al. (2012) |
| Dactyloidae | <i>Anolis ocelloscapularis</i> | 0 | Aliva-Pires (1996); Nicholson et al. (2012) |
| Dactyloidae | <i>Anolis oculatus</i>         | 0 | Aliva-Pires (1996); Nicholson et al. (2012) |
| Dactyloidae | <i>Anolis olssoni</i>          | 0 | Aliva-Pires (1996); Nicholson et al. (2012) |
| Dactyloidae | <i>Anolis onca</i>             | 0 | Aliva-Pires (1996); Nicholson et al. (2012) |
| Dactyloidae | <i>Anolis opalinus</i>         | 0 | Aliva-Pires (1996); Nicholson et al. (2012) |
| Dactyloidae | <i>Anolis ophiopsis</i>        | 0 | Aliva-Pires (1996); Nicholson et al. (2012) |
| Dactyloidae | <i>Anolis oporinus</i>         | 0 | Aliva-Pires (1996); Nicholson et al. (2012) |
| Dactyloidae | <i>Anolis ortonii</i>          | 0 | Aliva-Pires (1996); Nicholson et al. (2012) |
| Dactyloidae | <i>Anolis oxylophus</i>        | 0 | Aliva-Pires (1996); Nicholson et al. (2012) |
| Dactyloidae | <i>Anolis pachypus</i>         | 0 | Aliva-Pires (1996); Nicholson et al. (2012) |
| Dactyloidae | <i>Anolis paternus</i>         | 0 | Aliva-Pires (1996); Nicholson et al. (2012) |

|             |                               |   |                                             |
|-------------|-------------------------------|---|---------------------------------------------|
| Dactyloidae | <i>Anolis peraccae</i>        | 0 | Aliva-Pires (1996); Nicholson et al. (2012) |
| Dactyloidae | <i>Anolis placidus</i>        | 0 | Aliva-Pires (1996); Nicholson et al. (2012) |
| Dactyloidae | <i>Anolis poecilopus</i>      | 0 | Aliva-Pires (1996); Nicholson et al. (2012) |
| Dactyloidae | <i>Anolis pogus</i>           | 0 | Aliva-Pires (1996); Nicholson et al. (2012) |
| Dactyloidae | <i>Anolis polylepis</i>       | 0 | Aliva-Pires (1996); Nicholson et al. (2012) |
| Dactyloidae | <i>Anolis polyrhachis</i>     | 0 | Aliva-Pires (1996); Nicholson et al. (2012) |
| Dactyloidae | <i>Anolis poncensis</i>       | 0 | Aliva-Pires (1996); Nicholson et al. (2012) |
| Dactyloidae | <i>Anolis porcatus</i>        | 0 | Aliva-Pires (1996); Nicholson et al. (2012) |
| Dactyloidae | <i>Anolis porcus</i>          | 0 | Aliva-Pires (1996); Nicholson et al. (2012) |
| Dactyloidae | <i>Anolis princeps</i>        | 0 | Aliva-Pires (1996); Nicholson et al. (2012) |
| Dactyloidae | <i>Anolis pulchellus</i>      | 0 | Aliva-Pires (1996); Nicholson et al. (2012) |
| Dactyloidae | <i>Anolis pumilus</i>         | 0 | Aliva-Pires (1996); Nicholson et al. (2012) |
| Dactyloidae | <i>Anolis punctatus</i>       | 0 | Aliva-Pires (1996); Nicholson et al. (2012) |
| Dactyloidae | <i>Anolis purpurgularis</i>   | 0 | Aliva-Pires (1996); Nicholson et al. (2012) |
| Dactyloidae | <i>Anolis quadriocellifer</i> | 0 | Aliva-Pires (1996); Nicholson et al. (2012) |
| Dactyloidae | <i>Anolis quercorum</i>       | 0 | Aliva-Pires (1996); Nicholson et al. (2012) |
| Dactyloidae | <i>Anolis reconditus</i>      | 0 | Aliva-Pires (1996); Nicholson et al. (2012) |
| Dactyloidae | <i>Anolis relictus</i>        | 0 | Aliva-Pires (1996); Nicholson et al. (2012) |
| Dactyloidae | <i>Anolis richardii</i>       | 0 | Aliva-Pires (1996); Nicholson et al. (2012) |
| Dactyloidae | <i>Anolis ricordi</i>         | 0 | Aliva-Pires (1996); Nicholson et al. (2012) |
| Dactyloidae | <i>Anolis roquet</i>          | 0 | Aliva-Pires (1996); Nicholson et al. (2012) |
| Dactyloidae | <i>Anolis rubribarbaris</i>   | 0 | Aliva-Pires (1996); Nicholson et al. (2012) |
| Dactyloidae | <i>Anolis sabanus</i>         | 0 | Aliva-Pires (1996); Nicholson et al. (2012) |
| Dactyloidae | <i>Anolis sagrei</i>          | 0 | Aliva-Pires (1996); Nicholson et al. (2012) |
| Dactyloidae | <i>Anolis scriptus</i>        | 0 | Aliva-Pires (1996); Nicholson et al. (2012) |
| Dactyloidae | <i>Anolis semilineatus</i>    | 0 | Aliva-Pires (1996); Nicholson et al. (2012) |
| Dactyloidae | <i>Anolis sericeus</i>        | 0 | Aliva-Pires (1996); Nicholson et al. (2012) |
| Dactyloidae | <i>Anolis sheplani</i>        | 0 | Aliva-Pires (1996); Nicholson et al. (2012) |
| Dactyloidae | <i>Anolis shrevei</i>         | 0 | Aliva-Pires (1996); Nicholson et al. (2012) |
| Dactyloidae | <i>Anolis singularis</i>      | 0 | Aliva-Pires (1996); Nicholson et al. (2012) |
| Dactyloidae | <i>Anolis smallwoodi</i>      | 0 | Aliva-Pires (1996); Nicholson et al. (2012) |
| Dactyloidae | <i>Anolis smaragdinus</i>     | 0 | Aliva-Pires (1996); Nicholson et al. (2012) |
| Dactyloidae | <i>Anolis sminthus</i>        | 0 | Aliva-Pires (1996); Nicholson et al. (2012) |
| Dactyloidae | <i>Anolis strahmi</i>         | 0 | Aliva-Pires (1996); Nicholson et al. (2012) |
| Dactyloidae | <i>Anolis stratulus</i>       | 0 | Aliva-Pires (1996); Nicholson et al. (2012) |
| Dactyloidae | <i>Anolis terraealtae</i>     | 0 | Aliva-Pires (1996); Nicholson et al. (2012) |
| Dactyloidae | <i>Anolis tigrinus</i>        | 0 | Aliva-Pires (1996); Nicholson et al. (2012) |
| Dactyloidae | <i>Anolis trachyderma</i>     | 0 | Aliva-Pires (1996); Nicholson et al. (2012) |
| Dactyloidae | <i>Anolis transversalis</i>   | 0 | Aliva-Pires (1996); Nicholson et al. (2012) |
| Dactyloidae | <i>Anolis trinitatis</i>      | 0 | Aliva-Pires (1996); Nicholson et al. (2012) |
| Dactyloidae | <i>Anolis tropidogaster</i>   | 0 | Aliva-Pires (1996); Nicholson et al. (2012) |
| Dactyloidae | <i>Anolis tropidonotus</i>    | 0 | Aliva-Pires (1996); Nicholson et al. (2012) |
| Dactyloidae | <i>Anolis uniformis</i>       | 0 | Aliva-Pires (1996); Nicholson et al. (2012) |



|                 |                                |   |                                             |
|-----------------|--------------------------------|---|---------------------------------------------|
| Dactyloidae     | <i>Anolis utilis</i>           | 0 | Aliva-Pires (1996); Nicholson et al. (2012) |
| Dactyloidae     | <i>Anolis valencienni</i>      | 0 | Aliva-Pires (1996); Nicholson et al. (2012) |
| Dactyloidae     | <i>Anolis vanidicus</i>        | 0 | Aliva-Pires (1996); Nicholson et al. (2012) |
| Dactyloidae     | <i>Anolis vanzolinii</i>       | 0 | Aliva-Pires (1996); Nicholson et al. (2012) |
| Dactyloidae     | <i>Anolis ventrimaculatus</i>  | 0 | Aliva-Pires (1996); Nicholson et al. (2012) |
| Dactyloidae     | <i>Anolis vermiculatus</i>     | 0 | Aliva-Pires (1996); Nicholson et al. (2012) |
| Dactyloidae     | <i>Anolis wattsi</i>           | 0 | Aliva-Pires (1996); Nicholson et al. (2012) |
| Dactyloidae     | <i>Anolis websteri</i>         | 0 | Aliva-Pires (1996); Nicholson et al. (2012) |
| Dactyloidae     | <i>Anolis whitemani</i>        | 0 | Aliva-Pires (1996); Nicholson et al. (2012) |
| Dactyloidae     | <i>Anolis woodi</i>            | 0 | Aliva-Pires (1996); Nicholson et al. (2012) |
| Dactyloidae     | <i>Anolis zeus</i>             | 0 | Aliva-Pires (1996); Nicholson et al. (2012) |
| Dibamidae       | <i>Anelytropsis papillosus</i> | 0 | Hoser et al. (2012)                         |
| Dibamidae       | <i>Dibamus bourreti</i>        | 0 | Darevsky (1992)                             |
| Dibamidae       | <i>Dibamus celebensis</i>      | 0 | Greer (1985)                                |
| Dibamidae       | <i>Dibamus greeri</i>          | 0 | Darevsky (1992)                             |
| Dibamidae       | <i>Dibamus montanus</i>        | 1 | Smith (1935)                                |
| Dibamidae       | <i>Dibamus novaeguineae</i>    | 1 | Smith (1935); Hoser et al. (2012)           |
| Dibamidae       | <i>Dibamus seramensis</i>      | 0 | Greer (1985)                                |
| Dibamidae       | <i>Dibamus tiomanensis</i>     | 0 | Greer (1985)                                |
| Diplodactylidae | <i>Bavayia cyclura</i>         | 1 | Kluge (1967a)                               |
| Diplodactylidae | <i>Bavayia geitaina</i>        | 1 | Kluge (1967a)                               |
| Diplodactylidae | <i>Bavayia goroensis</i>       | 1 | Kluge (1967a)                               |
| Diplodactylidae | <i>Bavayia madjo</i>           | 1 | Kluge (1967a)                               |
| Diplodactylidae | <i>Bavayia montana</i>         | 1 | Kluge (1967a)                               |
| Diplodactylidae | <i>Bavayia ornata</i>          | 1 | Kluge (1967a)                               |
| Diplodactylidae | <i>Bavayia pulchella</i>       | 1 | Kluge (1967a)                               |
| Diplodactylidae | <i>Bavayia sauvagii</i>        | 1 | Kluge (1967a)                               |
| Diplodactylidae | <i>Crenadactylus ocellatus</i> | 1 | Cogger (2014)                               |
| Diplodactylidae | <i>Dierogekko inexpectatus</i> | 1 | Bauer et al. (2006)                         |
| Diplodactylidae | <i>Dierogekko insularis</i>    | 1 | Bauer et al. (2006)                         |
| Diplodactylidae | <i>Dierogekko kaalaensis</i>   | 1 | Bauer et al. (2006)                         |
| Diplodactylidae | <i>Dierogekko koniambo</i>     | 1 | Bauer et al. (2006)                         |
| Diplodactylidae | <i>Dierogekko nehouensis</i>   | 1 | Bauer et al. (2006)                         |
| Diplodactylidae | <i>Dierogekko poumensis</i>    | 1 | Bauer et al. (2006)                         |
| Diplodactylidae | <i>Dierogekko thomaswhitei</i> | 1 | Bauer et al. (2006)                         |
| Diplodactylidae | <i>Dierogekko validiclavis</i> | 1 | Bauer et al. (2006)                         |
| Diplodactylidae | <i>Diplodactylus capensis</i>  | 0 | Cogger (2014)                               |

|                 |                                      |   |                               |
|-----------------|--------------------------------------|---|-------------------------------|
| Diplodactylidae | <i>Diplodactylus conspicillatus</i>  | 0 | Cogger (2014)                 |
| Diplodactylidae | <i>Diplodactylus fulleri</i>         | 0 | Cogger (2014)                 |
| Diplodactylidae | <i>Diplodactylus galeatus</i>        | 0 | Cogger (2014)                 |
| Diplodactylidae | <i>Diplodactylus granariensis</i>    | 0 | Cogger (2014)                 |
| Diplodactylidae | <i>Diplodactylus klugei</i>          | 0 | Cogger (2014)                 |
| Diplodactylidae | <i>Diplodactylus mitchelli</i>       | 0 | Cogger (2014)                 |
| Diplodactylidae | <i>Diplodactylus ornatus</i>         | 0 | Cogger (2014)                 |
| Diplodactylidae | <i>Diplodactylus polyophthalmus</i>  | 0 | Cogger (2014)                 |
| Diplodactylidae | <i>Diplodactylus pulcher</i>         | 0 | Cogger (2014)                 |
| Diplodactylidae | <i>Diplodactylus savagei</i>         | 0 | Cogger (2014)                 |
| Diplodactylidae | <i>Diplodactylus tessellatus</i>     | 0 | Cogger (2014)                 |
| Diplodactylidae | <i>Diplodactylus vittatus</i>        | 0 | Cogger (2014)                 |
| Diplodactylidae | <i>Eurydactylodes agricolae</i>      | 1 | Bauer et al. (2009)           |
| Diplodactylidae | <i>Eurydactylodes occidentalis</i>   | 1 | Bauer et al. (2009)           |
| Diplodactylidae | <i>Eurydactylodes symmetricus</i>    | 1 | Bauer et al. (2009)           |
| Diplodactylidae | <i>Eurydactylodes vieillardii</i>    | 1 | Bauer et al. (2009)           |
| Diplodactylidae | <i>Hoplodactylus chrysosireticus</i> | 1 | Kluge (1967a)                 |
| Diplodactylidae | <i>Hoplodactylus cryptozoicus</i>    | 1 | Kluge (1967a)                 |
| Diplodactylidae | <i>Hoplodactylus duvaucelii</i>      | 1 | Kluge (1967a)                 |
| Diplodactylidae | <i>Hoplodactylus granulatus</i>      | 1 | Kluge (1967a)                 |
| Diplodactylidae | <i>Hoplodactylus kahutarae</i>       | 1 | Kluge (1967a)                 |
| Diplodactylidae | <i>Hoplodactylus maculatus</i>       | 1 | Kluge (1967a)                 |
| Diplodactylidae | <i>Hoplodactylus nebulosus</i>       | 1 | Kluge (1967a)                 |
| Diplodactylidae | <i>Hoplodactylus pacificus</i>       | 1 | Kluge (1967a)                 |
| Diplodactylidae | <i>Hoplodactylus rakiurae</i>        | 1 | Kluge (1967a)                 |
| Diplodactylidae | <i>Hoplodactylus stephensi</i>       | 1 | Kluge (1967a)                 |
| Diplodactylidae | <i>Lucasium alboguttatum</i>         | 1 | Cogger (2014)                 |
| Diplodactylidae | <i>Lucasium byrnei</i>               | 0 | Cogger (2014)                 |
| Diplodactylidae | <i>Lucasium damaeum</i>              | 1 | Doughty and Hutchinson (2008) |
| Diplodactylidae | <i>Lucasium immaculatum</i>          | 1 | Cogger (2014)                 |

|                 |                                     |   |                                          |
|-----------------|-------------------------------------|---|------------------------------------------|
| Diplodactylidae | <i>Lucasium maini</i>               | 0 | Cogger (2014)                            |
| Diplodactylidae | <i>Lucasium squarrosum</i>          | 1 | Cogger (2014)                            |
| Diplodactylidae | <i>Lucasium steindachneri</i>       | 1 | Cogger (2014)                            |
| Diplodactylidae | <i>Lucasium stenodactylum</i>       | 1 | Cogger (2014)                            |
| Diplodactylidae | <i>Lucasium wombeyi</i>             | 1 | Cogger (2014)                            |
| Diplodactylidae | <i>Naultinus elegans</i>            | 1 | Kluge (1967a); Nielsen et al. (2011)     |
| Diplodactylidae | <i>Naultinus gemmeus</i>            | 1 | Kluge (1967a); Nielsen et al. (2011)     |
| Diplodactylidae | <i>Naultinus grayii</i>             | 1 | Kluge (1967a); Nielsen et al. (2011)     |
| Diplodactylidae | <i>Naultinus manukanus</i>          | 1 | Kluge (1967a); Nielsen et al. (2011)     |
| Diplodactylidae | <i>Naultinus poecilochlorus</i>     | 1 | Kluge (1967a); Nielsen et al. (2011)     |
| Diplodactylidae | <i>Naultinus rudis</i>              | 1 | Kluge (1967a); Nielsen et al. (2011)     |
| Diplodactylidae | <i>Naultinus stellatus</i>          | 1 | Kluge (1967a); Nielsen et al. (2011)     |
| Diplodactylidae | <i>Naultinus tuberculatus</i>       | 1 | Kluge (1967a); Nielsen et al. (2011)     |
| Diplodactylidae | <i>Oedodera marmorata</i>           | 1 | Bauer et al. (2012)                      |
| Diplodactylidae | <i>Oedura castelnaui</i>            | 1 | Kluge (1967a)                            |
| Diplodactylidae | <i>Oedura coggeri</i>               | 1 | Kluge (1967a)                            |
| Diplodactylidae | <i>Oedura filicipoda</i>            | 1 | Kluge (1967a)                            |
| Diplodactylidae | <i>Oedura gemmata</i>               | 1 | Kluge (1967a)                            |
| Diplodactylidae | <i>Oedura gracilis</i>              | 1 | Kluge (1967a)                            |
| Diplodactylidae | <i>Oedura lesueurii</i>             | 1 | Kluge (1967a)                            |
| Diplodactylidae | <i>Oedura marmorata</i>             | 1 | Kluge (1967a)                            |
| Diplodactylidae | <i>Oedura monilis</i>               | 1 | Kluge (1967a)                            |
| Diplodactylidae | <i>Oedura obscura</i>               | 1 | Kluge (1967a)                            |
| Diplodactylidae | <i>Oedura reticulata</i>            | 1 | Kluge (1967a)                            |
| Diplodactylidae | <i>Oedura rhombifer</i>             | 1 | Kluge (1967a)                            |
| Diplodactylidae | <i>Oedura robusta</i>               | 1 | Kluge (1967a)                            |
| Diplodactylidae | <i>Oedura tryoni</i>                | 1 | Kluge (1967a)                            |
| Diplodactylidae | <i>Pseudothecadactylus lindneri</i> | 1 | Kluge and Nussbaum (1995); Cogger (1975) |
| Diplodactylidae | <i>Rhacodactylus auriculatus</i>    | 1 | Kluge (1967a)                            |
| Diplodactylidae | <i>Rhacodactylus chahoua</i>        | 1 | Kluge (1967a)                            |
| Diplodactylidae | <i>Rhacodactylus ciliatus</i>       | 1 | Kluge (1967a)                            |
| Diplodactylidae | <i>Rhacodactylus leachianus</i>     | 1 | Kluge (1967a)                            |
| Diplodactylidae | <i>Rhacodactylus sarasinorum</i>    | 1 | Kluge (1967a)                            |
| Diplodactylidae | <i>Rhacodactylus trachyrhynchus</i> | 1 | Kluge (1967a)                            |
| Diplodactylidae | <i>Rhynchoedura ornata</i>          | 1 | Kluge (1967a)                            |
| Diplodactylidae | <i>Strophurus assimilis</i>         | 1 | Cogger (2014)                            |
| Diplodactylidae | <i>Strophurus ciliaris</i>          | 1 | Cogger (2014)                            |

|                 |                                     |   |                                                              |
|-----------------|-------------------------------------|---|--------------------------------------------------------------|
| Diplodactylidae | <i>Strophurus elderi</i>            | 1 | Cogger (2014)                                                |
| Diplodactylidae | <i>Strophurus intermedius</i>       | 1 | Cogger (2014)                                                |
| Diplodactylidae | <i>Strophurus jeanae</i>            | 1 | Cogger (2014)                                                |
| Diplodactylidae | <i>Strophurus krisalys</i>          | 1 | Cogger (2014)                                                |
| Diplodactylidae | <i>Strophurus mcmillani</i>         | 0 | Cogger (2014)                                                |
| Diplodactylidae | <i>Strophurus rankini</i>           | 1 | Cogger (2014)                                                |
| Diplodactylidae | <i>Strophurus spinigerus</i>        | 1 | Cogger (2014)                                                |
| Diplodactylidae | <i>Strophurus strophurus</i>        | 1 | Cogger (2014)                                                |
| Diplodactylidae | <i>Strophurus taeniatus</i>         | 0 | Cogger (2014)                                                |
| Diplodactylidae | <i>Strophurus taenicauda</i>        | 1 | Boulenger (1887)                                             |
| Diplodactylidae | <i>Strophurus wellingtonae</i>      | 1 | Cogger (2014)                                                |
| Diplodactylidae | <i>Strophurus williamsi</i>         | 1 | Cogger (2014)                                                |
| Eublepharidae   | <i>Aelurosscalabotes felinus</i>    | 1 | De Rooij (1915); Kluge (1967a)                               |
| Eublepharidae   | <i>Coleonyx brevis</i>              | 1 | Kluge (1967a)                                                |
| Eublepharidae   | <i>Coleonyx elegans</i>             | 1 | Kluge (1967a)                                                |
| Eublepharidae   | <i>Coleonyx mitratus</i>            | 1 | Kluge (1967a)                                                |
| Eublepharidae   | <i>Coleonyx variegatus</i>          | 1 | Kluge (1967a)                                                |
| Eublepharidae   | <i>Eublepharis macularius</i>       | 1 | Smith (1935); Kluge (1967a)                                  |
| Eublepharidae   | <i>Eublepharis turcmenicus</i>      | 1 | Smith (1935); Kluge (1967a)                                  |
| Eublepharidae   | <i>Goniurosaurus araneus</i>        | 1 | Wang et al. (2013)                                           |
| Eublepharidae   | <i>Goniurosaurus catbaensis</i>     | 1 | Wang et al. (2013)                                           |
| Eublepharidae   | <i>Goniurosaurus kuroiwae</i>       | 0 | Wang et al. (2013)                                           |
| Eublepharidae   | <i>Goniurosaurus lichtenfelderi</i> | 1 | Wang et al. (2013)                                           |
| Eublepharidae   | <i>Goniurosaurus luii</i>           | 1 | Wang et al. (2013)                                           |
| Eublepharidae   | <i>Hemitheconyx caudicinctus</i>    | 1 | Loveridge (1947)                                             |
| Eublepharidae   | <i>Hemitheconyx taylori</i>         | 1 | Loveridge (1947)                                             |
| Eublepharidae   | <i>Holodactylus africanus</i>       | 0 | Loveridge (1947); Kluge (1967a,b); Kluge and Nussbaum (1995) |
| Gekkonidae      | <i>Afroedura karroica</i>           | 1 | Loveridge (1947)                                             |
| Gekkonidae      | <i>Afroedura pondolia</i>           | 1 | Loveridge (1947)                                             |
| Gekkonidae      | <i>Afrogecko porphyreus</i>         | 0 | Bauer et al. (1997); Heinicke et al. (2014)                  |
| Gekkonidae      | <i>Afrogecko swartbergensis</i>     | 0 | Bauer et al. (1997); Heinicke et al. (2014)                  |
| Gekkonidae      | <i>Agamura persica</i>              | 1 | Smith (1935)                                                 |
| Gekkonidae      | <i>Aihuronyx seychellensis</i>      | 1 | Boulenger (1885); Gerlach and Canning (1996)                 |

|            |                                       |   |                                              |
|------------|---------------------------------------|---|----------------------------------------------|
| Gekkonidae | <i>Ailuronyx tachyscopaeus</i>        | 1 | Boulenger (1885); Gerlach and Canning (1996) |
| Gekkonidae | <i>Ailuronyx trachygaster</i>         | 1 | Boulenger (1885)                             |
| Gekkonidae | <i>Alsophylax pipiens</i>             | 1 | Szcerbak and Golubev (1996)                  |
| Gekkonidae | <i>Blaesodactylus antongilensis</i>   | 0 | Kluge and Nussbaum (1995)                    |
| Gekkonidae | <i>Blaesodactylus boivini</i>         | 0 | Kluge and Nussbaum (1995)                    |
| Gekkonidae | <i>Blaesodactylus sakalava</i>        | 0 | Kluge and Nussbaum (1995)                    |
| Gekkonidae | <i>Bunopus crassicauda</i>            | 1 | Ananjeva et al. (2006)                       |
| Gekkonidae | <i>Bunopus tuberculatus</i>           | 1 | Blanford (1847); Ananjeva et al. (2006)      |
| Gekkonidae | <i>Calodactylodes aureus</i>          | 1 | Bauer and Das (2000)                         |
| Gekkonidae | <i>Calodactylodes illingworthorum</i> | 1 | Kluge (1967a); Amarasinghe et al. (2009)     |
| Gekkonidae | <i>Chondrodactylus angulifer</i>      | 1 | Loveridge (1947); Kluge and Nussbaum (1995)  |
| Gekkonidae | <i>Chondrodactylus bibronii</i>       | 0 | Loveridge (1947); Kluge and Nussbaum (1995)  |
| Gekkonidae | <i>Chondrodactylus fitzsimonsi</i>    | 0 | Loveridge (1947); Kluge and Nussbaum (1995)  |
| Gekkonidae | <i>Chondrodactylus turneri</i>        | 0 | Loveridge (1947); Kluge and Nussbaum (1995)  |
| Gekkonidae | <i>Christinus marmoratus</i>          | 1 | Heinicke et al. (2014)                       |
| Gekkonidae | <i>Cnemaspis africana</i>             | 1 | Loveridge (1947)                             |
| Gekkonidae | <i>Cnemaspis dickersoni</i>           | 1 | Perret (1986)                                |
| Gekkonidae | <i>Cnemaspis kandiana</i>             | 1 | Smith (1935)                                 |
| Gekkonidae | <i>Cnemaspis kendallii</i>            | 1 | Grismer et al. (2010)                        |
| Gekkonidae | <i>Cnemaspis limi</i>                 | 0 | Grismer et al. (2010)                        |
| Gekkonidae | <i>Cnemaspis podihuna</i>             | 1 | Amarasinghe and Bauer (2009)                 |
| Gekkonidae | <i>Cnemaspis tropidogaster</i>        | 1 | Amarasinghe and Bauer (2009)                 |
| Gekkonidae | <i>Cnemaspis uzungwae</i>             | 0 | Perret (1986)                                |
| Gekkonidae | <i>Colopus kochii</i>                 | 0 | Loveridge (1947)                             |
| Gekkonidae | <i>Colopus wahlbergii</i>             | 0 | Loveridge (1947)                             |
| Gekkonidae | <i>Crossobamon orientalis</i>         | 1 | Ananjeva et al. (2006)                       |
| Gekkonidae | <i>Cryptactites peringueyi</i>        | 0 | Heinicke et al. (2014)                       |
| Gekkonidae | <i>Cyrtodactylus agusanensis</i>      | 1 | Linkem et al. (2008)                         |
| Gekkonidae | <i>Cyrtodactylus angularis</i>        | 1 | Quang et al. (2007)                          |
| Gekkonidae | <i>Cyrtodactylus annulatus</i>        | 1 | Linkem et al. (2008)                         |
| Gekkonidae | <i>Cyrtodactylus ayeyarwadyensis</i>  | 1 | Bauer et al. (2013)                          |
| Gekkonidae | <i>Cyrtodactylus</i>                  | 1 | Quang et al. (2007)                          |

|            |                                    |   |                                            |
|------------|------------------------------------|---|--------------------------------------------|
|            | <i>consobrinus</i>                 |   |                                            |
| Gekkonidae | <i>Cyrtodactylus epiroticus</i>    | 1 | Kraus (2008)                               |
| Gekkonidae | <i>Cyrtodactylus intermedius</i>   | 1 | Quang et al. (2007)                        |
| Gekkonidae | <i>Cyrtodactylus irregularis</i>   | 1 | Quang et al. (2007)                        |
| Gekkonidae | <i>Cyrtodactylus jarujini</i>      | 1 | Linkem et al. (2008)                       |
| Gekkonidae | <i>Cyrtodactylus klugei</i>        | 1 | Shea et al. (2011)                         |
| Gekkonidae | <i>Cyrtodactylus loriae</i>        | 1 | Linkem et al. (2008)                       |
| Gekkonidae | <i>Cyrtodactylus louisianensis</i> | 1 | Linkem et al. (2008)                       |
| Gekkonidae | <i>Cyrtodactylus marmoratus</i>    | 1 | Quang et al. (2007)                        |
| Gekkonidae | <i>Cyrtodactylus novaeguineae</i>  | 1 | Linkem et al. (2008)                       |
| Gekkonidae | <i>Cyrtodactylus oldhami</i>       | 1 | Quang et al. (2007)                        |
| Gekkonidae | <i>Cyrtodactylus philippinicus</i> | 1 | Linkem et al. (2008)                       |
| Gekkonidae | <i>Cyrtodactylus pulchellus</i>    | 1 | Quang et al. (2007); Grismer et al. (2012) |
| Gekkonidae | <i>Cyrtodactylus robustus</i>      | 1 | Shea et al. (2011)                         |
| Gekkonidae | <i>Cyrtodactylus sermowaiensis</i> | 0 | Linkem et al. (2008)                       |
| Gekkonidae | <i>Cyrtodactylus triedrus</i>      | 0 | Amarasinghe et al. (2009)                  |
| Gekkonidae | <i>Cyrtodactylus tripartitus</i>   | 1 | Kraus (2008)                               |
| Gekkonidae | <i>Cyrtodactylus tuberculatus</i>  | 1 | Shea et al. (2011)                         |
| Gekkonidae | <i>Cyrtopodion agamuroides</i>     | 1 | Ananjeva et al. (2006); Khan (2008)        |
| Gekkonidae | <i>Cyrtopodion caspium</i>         | 1 | Ananjeva et al. (2006)                     |
| Gekkonidae | <i>Cyrtopodion gastrophole</i>     | 1 | Ananjeva et al. (2006)                     |
| Gekkonidae | <i>Cyrtopodion kotschy</i>         | 1 | Ananjeva et al. (2006)                     |
| Gekkonidae | <i>Cyrtopodion longipes</i>        | 1 | Ananjeva et al. (2006)                     |
| Gekkonidae | <i>Cyrtopodion russowii</i>        | 1 | Ananjeva et al. (2006)                     |
| Gekkonidae | <i>Cyrtopodion sagittiferum</i>    | 1 | Ananjeva et al. (2006)                     |
| Gekkonidae | <i>Cyrtopodion scabrum</i>         | 1 | Ananjeva et al. (2006)                     |
| Gekkonidae | <i>Cyrtopodion sistansensis</i>    | 1 | Ananjeva et al. (2006)                     |
| Gekkonidae | <i>Cyrtopodion spinicaudum</i>     | 1 | Ananjeva et al. (2006)                     |
| Gekkonidae | <i>Dixonius melanostictus</i>      | 1 | Bauer et al. (1997)                        |
| Gekkonidae | <i>Dixonius siamensis</i>          | 1 | Bauer et al. (1997)                        |

|            |                                    |   |                                                |
|------------|------------------------------------|---|------------------------------------------------|
| Gekkonidae | <i>Dixonius vietnamensis</i>       | 1 | Bauer et al. (1997)                            |
| Gekkonidae | <i>Ebenavia inunguis</i>           | 0 | Kluge and Nussbaum (1995); Bauer et al. (1997) |
| Gekkonidae | <i>Elasmodactylus tetensis</i>     | 1 | Bauer and Lamb (2004)                          |
| Gekkonidae | <i>Elasmodactylus tuberculosus</i> | 1 | Bauer and Lamb (2004)                          |
| Gekkonidae | <i>Geckolepis maculata</i>         | 0 | Kluge and Nussbaum (1995)                      |
| Gekkonidae | <i>Geckolepis typica</i>           | 0 | Kluge and Nussbaum (1995)                      |
| Gekkonidae | <i>Gehyra australis</i>            | 1 | Zug (2013)                                     |
| Gekkonidae | <i>Gehyra baliola</i>              | 1 | Zug (2013)                                     |
| Gekkonidae | <i>Gehyra barea</i>                | 1 | Zug (2013)                                     |
| Gekkonidae | <i>Gehyra borrooloola</i>          | 1 | Zug (2013)                                     |
| Gekkonidae | <i>Gehyra brevipalmata</i>         | 1 | Zug (2013)                                     |
| Gekkonidae | <i>Gehyra catenata</i>             | 1 | Zug (2013)                                     |
| Gekkonidae | <i>Gehyra dubia</i>                | 1 | Zug (2013)                                     |
| Gekkonidae | <i>Gehyra fehlmanni</i>            | 1 | Zug (2013)                                     |
| Gekkonidae | <i>Gehyra koiria</i>               | 1 | Zug (2013)                                     |
| Gekkonidae | <i>Gehyra lacerata</i>             | 1 | Zug (2013)                                     |
| Gekkonidae | <i>Gehyra marginata</i>            | 1 | Zug (2013)                                     |
| Gekkonidae | <i>Gehyra membranacruralis</i>     | 1 | Zug (2013)                                     |
| Gekkonidae | <i>Gehyra minuta</i>               | 1 | Zug (2013)                                     |
| Gekkonidae | <i>Gehyra montium</i>              | 1 | Zug (2013)                                     |
| Gekkonidae | <i>Gehyra mutilata</i>             | 1 | Smith (1935); Zug (2013)                       |
| Gekkonidae | <i>Gehyra nana</i>                 | 1 | Zug (2013)                                     |
| Gekkonidae | <i>Gehyra occidentalis</i>         | 1 | Zug (2013)                                     |
| Gekkonidae | <i>Gehyra oceanica</i>             | 1 | Zug (2013)                                     |
| Gekkonidae | <i>Gehyra pamela</i>               | 1 | Zug (2013)                                     |
| Gekkonidae | <i>Gehyra pilbara</i>              | 1 | Zug (2013)                                     |
| Gekkonidae | <i>Gehyra punctata</i>             | 1 | Zug (2013)                                     |
| Gekkonidae | <i>Gehyra purpurascens</i>         | 1 | Zug (2013)                                     |
| Gekkonidae | <i>Gehyra robusta</i>              | 1 | Zug (2013)                                     |
| Gekkonidae | <i>Gehyra variegata</i>            | 1 | Zug (2013)                                     |
| Gekkonidae | <i>Gehyra xenopus</i>              | 1 | Zug (2013)                                     |
| Gekkonidae | <i>Gekko athymus</i>               | 1 | Smith (1935)                                   |
| Gekkonidae | <i>Gekko auriverrucosus</i>        | 1 | Smith (1935)                                   |
| Gekkonidae | <i>Gekko badenii</i>               | 1 | Smith (1935)                                   |
| Gekkonidae | <i>Gekko chinensis</i>             | 1 | Zhou et al. (1982)                             |
| Gekkonidae | <i>Gekko crombota</i>              | 1 | Smith (1935)                                   |
| Gekkonidae | <i>Gekko gecko</i>                 | 1 | Smith (1935); Zug (2013)                       |
| Gekkonidae | <i>Gekko grossmanni</i>            | 1 | Smith (1935)                                   |
| Gekkonidae | <i>Gekko hokouensis</i>            | 1 | Smith (1935)                                   |
| Gekkonidae | <i>Gekko japonicus</i>             | 1 | Zhou et al. (1982)                             |
| Gekkonidae | <i>Gekko mindorensis</i>           | 1 | Smith (1935)                                   |

|            |                                   |   |                                             |
|------------|-----------------------------------|---|---------------------------------------------|
| Gekkonidae | <i>Gekko monarchus</i>            | 1 | Smith (1935)                                |
| Gekkonidae | <i>Gekko petricolus</i>           | 1 | Smith (1935)                                |
| Gekkonidae | <i>Gekko porosus</i>              | 1 | Smith (1935)                                |
| Gekkonidae | <i>Gekko romblon</i>              | 1 | Smith (1935)                                |
| Gekkonidae | <i>Gekko smithii</i>              | 1 | Smith (1935)                                |
| Gekkonidae | <i>Gekko swinhonis</i>            | 1 | Smith (1935)                                |
| Gekkonidae | <i>Gekko vittatus</i>             | 1 | Smith (1935); Zug (2013)                    |
| Gekkonidae | <i>Goggia lineata</i>             | 1 | Bauer et al. (1997)                         |
| Gekkonidae | <i>Hemidactylus aaronbaueri</i>   | 1 | Giri and Bauer (2008)                       |
| Gekkonidae | <i>Hemidactylus agrius</i>        | 1 | Vanzolini (1978)                            |
| Gekkonidae | <i>Hemidactylus albofasciatus</i> | 1 | Giri and Bauer (2008)                       |
| Gekkonidae | <i>Hemidactylus angulatus</i>     | 1 | Lenglet (2006)                              |
| Gekkonidae | <i>Hemidactylus bouvieri</i>      | 1 | Loveridge (1947)                            |
| Gekkonidae | <i>Hemidactylus bowringii</i>     | 1 | Smith (1935)                                |
| Gekkonidae | <i>Hemidactylus brasiliensis</i>  | 1 | do Amaral (1935)                            |
| Gekkonidae | <i>Hemidactylus brookii</i>       | 1 | Smith (1935)                                |
| Gekkonidae | <i>Hemidactylus cinternii</i>     | 1 | Loveridge (1947)                            |
| Gekkonidae | <i>Hemidactylus depressus</i>     | 1 | Smith (1935)                                |
| Gekkonidae | <i>Hemidactylus dracaenacolus</i> | 1 | Rösler and Wranik (1999)                    |
| Gekkonidae | <i>Hemidactylus fasciata</i>      | 1 | Loveridge (1947)                            |
| Gekkonidae | <i>Hemidactylus fasciatus</i>     | 1 | Loveridge (1947)                            |
| Gekkonidae | <i>Hemidactylus flaviviridis</i>  | 1 | Smith (1935)                                |
| Gekkonidae | <i>Hemidactylus forbesii</i>      | 0 | Loveridge (1947); Kluge and Nussbaum (1995) |
| Gekkonidae | <i>Hemidactylus foudaii</i>       | 1 | Baha-El-Din (2003)                          |
| Gekkonidae | <i>Hemidactylus frenatus</i>      | 1 | Smith (1935)                                |
| Gekkonidae | <i>Hemidactylus garnotii</i>      | 1 | Smith (1935)                                |
| Gekkonidae | <i>Hemidactylus giganteus</i>     | 1 | Smith (1935)                                |
| Gekkonidae | <i>Hemidactylus gracilis</i>      | 1 | Boulenger (1885)                            |
| Gekkonidae | <i>Hemidactylus granti</i>        | 1 | Loveridge (1947)                            |
| Gekkonidae | <i>Hemidactylus greeffii</i>      | 1 | Loveridge (1947)                            |
| Gekkonidae | <i>Hemidactylus haitianus</i>     | 1 | Lenglet (2006)                              |
| Gekkonidae | <i>Hemidactylus homoeolepis</i>   | 1 | Loveridge (1947)                            |
| Gekkonidae | <i>Hemidactylus</i>               | 1 | Smith (1935)                                |



|            |                                       |   |                           |
|------------|---------------------------------------|---|---------------------------|
|            | <i>karenorum</i>                      |   |                           |
| Gekkonidae | <i>Hemidactylus lemurinus</i>         | 1 | Arnold (1980)             |
| Gekkonidae | <i>Hemidactylus leschenaultii</i>     | 1 | Smith (1935)              |
| Gekkonidae | <i>Hemidactylus longicephalus</i>     | 1 | Loveridge (1947)          |
| Gekkonidae | <i>Hemidactylus mabouia</i>           | 1 | Avila-Pires (1995)        |
| Gekkonidae | <i>Hemidactylus macropholis</i>       | 1 | Loveridge (1929)          |
| Gekkonidae | <i>Hemidactylus maculatus</i>         | 1 | Smith (1935)              |
| Gekkonidae | <i>Hemidactylus mercatorius</i>       | 1 | Vences and Wanke (2004)   |
| Gekkonidae | <i>Hemidactylus mindiae</i>           | 1 | Baha-El-Din (2005)        |
| Gekkonidae | <i>Hemidactylus modestus</i>          | 1 | Loveridge (1947)          |
| Gekkonidae | <i>Hemidactylus oxyrhinus</i>         | 1 | Loveridge (1947)          |
| Gekkonidae | <i>Hemidactylus palaichthus</i>       | 1 | Smith (1935)              |
| Gekkonidae | <i>Hemidactylus persicus</i>          | 1 | Smith (1935)              |
| Gekkonidae | <i>Hemidactylus platycephalus</i>     | 1 | Vences and Wanke (2004)   |
| Gekkonidae | <i>Hemidactylus platyurus</i>         | 1 | Boulenger (1885)          |
| Gekkonidae | <i>Hemidactylus prashadi</i>          | 1 | Smith (1935)              |
| Gekkonidae | <i>Hemidactylus pumilio</i>           | 1 | Loveridge (1947)          |
| Gekkonidae | <i>Hemidactylus reticulatus</i>       | 1 | Smith (1935)              |
| Gekkonidae | <i>Hemidactylus robustus</i>          | 1 | Busais (2011)             |
| Gekkonidae | <i>Hemidactylus satarauensis</i>      | 1 | Mirza et al. (2013)       |
| Gekkonidae | <i>Hemidactylus triedrus</i>          | 1 | Smith (1935)              |
| Gekkonidae | <i>Hemidactylus turcicus</i>          | 1 | Loveridge (1947)          |
| Gekkonidae | <i>Hemidactylus yerburyi</i>          | 1 | Busais (2011)             |
| Gekkonidae | <i>Hemiphyllodactylus aurantiacus</i> | 1 | Tri et al. (2014)         |
| Gekkonidae | <i>Hemiphyllodactylus typus</i>       | 1 | Smith (1935)              |
| Gekkonidae | <i>Hemiphyllodactylus yunnanensis</i> | 1 | Smith (1935)              |
| Gekkonidae | <i>Heteronotia binoei</i>             | 1 | Pepper et al. (2013)      |
| Gekkonidae | <i>Heteronotia planiceps</i>          | 1 | Pepper et al. (2013)      |
| Gekkonidae | <i>Heteronotia spelea</i>             | 1 | Pepper et al. (2013)      |
| Gekkonidae | <i>Homopholis fasciata</i>            | 1 | Kluge and Nussbaum (1995) |
| Gekkonidae | <i>Homopholis mulleri</i>             | 1 | Kluge and Nussbaum (1995) |

|            |                                      |   |                           |
|------------|--------------------------------------|---|---------------------------|
| Gekkonidae | <i>Homopholis walbergii</i>          | 1 | Kluge and Nussbaum (1995) |
| Gekkonidae | <i>Lepidodactylus lugubris</i>       | 1 | Smith (1935)              |
| Gekkonidae | <i>Lepidodactylus moestus</i>        | 1 | Zug (2013)                |
| Gekkonidae | <i>Lepidodactylus novaeguineae</i>   | 1 | Brown and Parker (1977)   |
| Gekkonidae | <i>Lepidodactylus orientalis</i>     | 1 | Brown and Parker (1977)   |
| Gekkonidae | <i>Luperosaurus cumingii</i>         | 1 | Brown et al. (2011)       |
| Gekkonidae | <i>Luperosaurus iskandari</i>        | 1 | Brown et al. (2011)       |
| Gekkonidae | <i>Luperosaurus joloensis</i>        | 1 | Brown et al. (2011)       |
| Gekkonidae | <i>Luperosaurus macgregori</i>       | 1 | Brown et al. (2011)       |
| Gekkonidae | <i>Lygodactylus angularis</i>        | 1 | Loveridge (1947)          |
| Gekkonidae | <i>Lygodactylus arnouliti</i>        | 1 | Loveridge (1947)          |
| Gekkonidae | <i>Lygodactylus blancae</i>          | 1 | Loveridge (1947)          |
| Gekkonidae | <i>Lygodactylus bradfieldi</i>       | 1 | Loveridge (1947)          |
| Gekkonidae | <i>Lygodactylus capensis</i>         | 1 | Loveridge (1947)          |
| Gekkonidae | <i>Lygodactylus chobiensis</i>       | 1 | Loveridge (1947)          |
| Gekkonidae | <i>Lygodactylus conraui</i>          | 1 | Loveridge (1947)          |
| Gekkonidae | <i>Lygodactylus expectatus</i>       | 1 | Loveridge (1947)          |
| Gekkonidae | <i>Lygodactylus gravis</i>           | 1 | Loveridge (1947)          |
| Gekkonidae | <i>Lygodactylus guibei</i>           | 1 | Loveridge (1947)          |
| Gekkonidae | <i>Lygodactylus gutturalis</i>       | 1 | Loveridge (1947)          |
| Gekkonidae | <i>Lygodactylus heterurus</i>        | 1 | Loveridge (1947)          |
| Gekkonidae | <i>Lygodactylus keniensis</i>        | 1 | Loveridge (1947)          |
| Gekkonidae | <i>Lygodactylus kimhowelli</i>       | 1 | Loveridge (1947)          |
| Gekkonidae | <i>Lygodactylus klugei</i>           | 1 | Loveridge (1947)          |
| Gekkonidae | <i>Lygodactylus lawrencei</i>        | 1 | Loveridge (1947)          |
| Gekkonidae | <i>Lygodactylus luteopicturatus</i>  | 1 | Loveridge (1947)          |
| Gekkonidae | <i>Lygodactylus madagascariensis</i> | 1 | Loveridge (1947)          |
| Gekkonidae | <i>Lygodactylus miops</i>            | 1 | Loveridge (1947)          |
| Gekkonidae | <i>Lygodactylus mirabilis</i>        | 1 | Loveridge (1947)          |
| Gekkonidae | <i>Lygodactylus montanus</i>         | 1 | Loveridge (1947)          |
| Gekkonidae | <i>Lygodactylus pauliani</i>         | 1 | Loveridge (1947)          |

|            |                                   |   |                                                      |
|------------|-----------------------------------|---|------------------------------------------------------|
| Gekkonidae | <i>Lygodactylus picturatus</i>    | 1 | Loveridge (1947)                                     |
| Gekkonidae | <i>Lygodactylus pictus</i>        | 1 | Loveridge (1947)                                     |
| Gekkonidae | <i>Lygodactylus rarus</i>         | 1 | Loveridge (1947)                                     |
| Gekkonidae | <i>Lygodactylus stevensoni</i>    | 1 | Loveridge (1947)                                     |
| Gekkonidae | <i>Lygodactylus thomensis</i>     | 1 | Loveridge (1947)                                     |
| Gekkonidae | <i>Lygodactylus tolampyae</i>     | 1 | Loveridge (1947)                                     |
| Gekkonidae | <i>Lygodactylus tuberosus</i>     | 1 | Loveridge (1947)                                     |
| Gekkonidae | <i>Lygodactylus verticillatus</i> | 1 | Loveridge (1947)                                     |
| Gekkonidae | <i>Lygodactylus williamsi</i>     | 1 | Loveridge (1947)                                     |
| Gekkonidae | <i>Matoatoa brevipes</i>          | 0 | Heinicke et al. (2014)                               |
| Gekkonidae | <i>Mediodactylus heterocercum</i> | 1 | Ananjeva et al. (2006); Červenka & Kratochvíl (2010) |
| Gekkonidae | <i>Mediodactylus heteropholis</i> | 1 | Ananjeva et al. (2006); Červenka & Kratochvíl (2010) |
| Gekkonidae | <i>Nactus acutus</i>              | 1 | Kraus (2005)                                         |
| Gekkonidae | <i>Nactus cheverti</i>            | 1 | Zug (1998)                                           |
| Gekkonidae | <i>Nactus eboracensis</i>         | 1 | Zug (1998)                                           |
| Gekkonidae | <i>Nactus galgajuga</i>           | 0 | Ingram (1978)                                        |
| Gekkonidae | <i>Nactus multicarinatus</i>      | 1 | Zug (2013)                                           |
| Gekkonidae | <i>Nactus pelagicus</i>           | 0 | Zug (2013)                                           |
| Gekkonidae | <i>Nactus vankampeni</i>          | 1 | Brown and Parker (1977)                              |
| Gekkonidae | <i>Narudasia festiva</i>          | 0 | Kluge and Nussbaum (1995); Daza et al. (2012)        |
| Gekkonidae | <i>Pachydactylus affinis</i>      | 0 | Bauer and Lamb (2005)                                |
| Gekkonidae | <i>Pachydactylus austeni</i>      | 0 | Bauer and Lamb (2005)                                |
| Gekkonidae | <i>Pachydactylus barnardi</i>     | 0 | Bauer and Lamb (2005)                                |
| Gekkonidae | <i>Pachydactylus bicolor</i>      | 0 | Bauer and Lamb (2005)                                |
| Gekkonidae | <i>Pachydactylus capensis</i>     | 0 | Bauer and Lamb (2005)                                |
| Gekkonidae | <i>Pachydactylus caraculicus</i>  | 0 | Bauer and Lamb (2005)                                |
| Gekkonidae | <i>Pachydactylus carinatus</i>    | 0 | Bauer and Lamb (2005)                                |
| Gekkonidae | <i>Pachydactylus fasciatus</i>    | 0 | Bauer and Lamb (2005)                                |
| Gekkonidae | <i>Pachydactylus formosus</i>     | 0 | Bauer and Lamb (2005)                                |
| Gekkonidae | <i>Pachydactylus gaiasensis</i>   | 0 | Bauer and Lamb (2005)                                |
| Gekkonidae | <i>Pachydactylus geitje</i>       | 0 | Bauer and Lamb (2005)                                |
| Gekkonidae | <i>Pachydactylus griffini</i>     | 0 | Bauer and Lamb (2005)                                |
| Gekkonidae | <i>Pachydactylus haackei</i>      | 0 | Bauer and Lamb (2005)                                |

|            |                                     |   |                               |
|------------|-------------------------------------|---|-------------------------------|
| Gekkonidae | <i>Pachydactylus kladaroderma</i>   | 0 | Bauer and Lamb (2005)         |
| Gekkonidae | <i>Pachydactylus labialis</i>       | 0 | Bauer and Lamb (2005)         |
| Gekkonidae | <i>Pachydactylus laevigatus</i>     | 0 | Bauer and Lamb (2005)         |
| Gekkonidae | <i>Pachydactylus maculatus</i>      | 0 | Bauer and Lamb (2005)         |
| Gekkonidae | <i>Pachydactylus mariquensis</i>    | 0 | Bauer and Lamb (2005)         |
| Gekkonidae | <i>Pachydactylus mclachlani</i>     | 0 | Bauer and Lamb (2005)         |
| Gekkonidae | <i>Pachydactylus monicae</i>        | 0 | Bauer and Lamb (2005)         |
| Gekkonidae | <i>Pachydactylus montanus</i>       | 0 | Bauer and Lamb (2005)         |
| Gekkonidae | <i>Pachydactylus namaquensis</i>    | 0 | Bauer and Lamb (2005)         |
| Gekkonidae | <i>Pachydactylus oculatus</i>       | 0 | Bauer and Lamb (2005)         |
| Gekkonidae | <i>Pachydactylus oreophilus</i>     | 0 | Bauer and Lamb (2005)         |
| Gekkonidae | <i>Pachydactylus oshaughnessyi</i>  | 0 | Bauer and Lamb (2005)         |
| Gekkonidae | <i>Pachydactylus parascutatus</i>   | 0 | Bauer and Lamb (2005)         |
| Gekkonidae | <i>Pachydactylus punctatus</i>      | 0 | Bauer and Lamb (2005)         |
| Gekkonidae | <i>Pachydactylus purcelli</i>       | 0 | Bauer and Lamb (2005)         |
| Gekkonidae | <i>Pachydactylus rangei</i>         | 0 | Bauer and Lamb (2005)         |
| Gekkonidae | <i>Pachydactylus reconditus</i>     | 0 | Bauer and Lamb (2005)         |
| Gekkonidae | <i>Pachydactylus robertsi</i>       | 0 | Bauer and Lamb (2005)         |
| Gekkonidae | <i>Pachydactylus rugosus</i>        | 0 | Bauer and Lamb (2005)         |
| Gekkonidae | <i>Pachydactylus sansteynae</i>     | 0 | Bauer and Lamb (2005)         |
| Gekkonidae | <i>Pachydactylus scherzi</i>        | 0 | Bauer and Lamb (2005)         |
| Gekkonidae | <i>Pachydactylus scutatus</i>       | 0 | Bauer and Lamb (2005)         |
| Gekkonidae | <i>Pachydactylus serval</i>         | 0 | Bauer and Lamb (2005)         |
| Gekkonidae | <i>Pachydactylus tigrinus</i>       | 0 | Bauer and Lamb (2005)         |
| Gekkonidae | <i>Pachydactylus tsodiloensis</i>   | 0 | Bauer and Lamb (2005)         |
| Gekkonidae | <i>Pachydactylus vansonii</i>       | 0 | Bauer and Lamb (2005)         |
| Gekkonidae | <i>Pachydactylus vanzyli</i>        | 0 | Bauer and Lamb (2005)         |
| Gekkonidae | <i>Pachydactylus waterbergensis</i> | 0 | Bauer and Lamb (2005)         |
| Gekkonidae | <i>Pachydactylus weberi</i>         | 0 | Bauer and Lamb (2005)         |
| Gekkonidae | <i>Paragehyra</i>                   | 1 | Nussbaum and Raxworthy (1994) |

|            |                                 |   |                                            |
|------------|---------------------------------|---|--------------------------------------------|
|            | <i>gabriellae</i>               |   |                                            |
| Gekkonidae | <i>Paroedura androyensis</i>    | 0 | Kluge and Nussbaum (1995)                  |
| Gekkonidae | <i>Paroedura bastardi</i>       | 0 | Kluge and Nussbaum (1995)                  |
| Gekkonidae | <i>Paroedura gracilis</i>       | 0 | Kluge and Nussbaum (1995)                  |
| Gekkonidae | <i>Paroedura homalorhina</i>    | 0 | Kluge and Nussbaum (1995)                  |
| Gekkonidae | <i>Paroedura karstophila</i>    | 0 | Kluge and Nussbaum (1995)                  |
| Gekkonidae | <i>Paroedura lohatsara</i>      | 0 | Kluge and Nussbaum (1995)                  |
| Gekkonidae | <i>Paroedura masobe</i>         | 0 | Kluge and Nussbaum (1995)                  |
| Gekkonidae | <i>Paroedura oviceps</i>        | 0 | Kluge and Nussbaum (1995)                  |
| Gekkonidae | <i>Paroedura picta</i>          | 0 | Kluge and Nussbaum (1995)                  |
| Gekkonidae | <i>Paroedura sanctijohannis</i> | 0 | Kluge and Nussbaum (1995)                  |
| Gekkonidae | <i>Paroedura stumpffi</i>       | 0 | Kluge and Nussbaum (1995)                  |
| Gekkonidae | <i>Paroedura tanjaka</i>        | 0 | Kluge and Nussbaum (1995)                  |
| Gekkonidae | <i>Paroedura vazimba</i>        | 0 | Kluge and Nussbaum (1995)                  |
| Gekkonidae | <i>Perochirus ateles</i>        | 1 | Brown (1976); Zug (2013)                   |
| Gekkonidae | <i>Phelsuma abbotti</i>         | 1 | Smith (1935); Loveridge (1947)             |
| Gekkonidae | <i>Phelsuma andamanense</i>     | 1 | Smith (1935); Loveridge (1947)             |
| Gekkonidae | <i>Phelsuma antanosy</i>        | 1 | Smith (1935); Loveridge (1947)             |
| Gekkonidae | <i>Phelsuma astriata</i>        | 1 | Smith (1935); Loveridge (1947)             |
| Gekkonidae | <i>Phelsuma barbouri</i>        | 1 | Smith (1935); Loveridge (1947)             |
| Gekkonidae | <i>Phelsuma berghofi</i>        | 1 | Smith (1935); Loveridge (1947)             |
| Gekkonidae | <i>Phelsuma borbonica</i>       | 1 | Smith (1935); Loveridge (1947)             |
| Gekkonidae | <i>Phelsuma breviceps</i>       | 1 | Smith (1935); Loveridge (1947)             |
| Gekkonidae | <i>Phelsuma cepediana</i>       | 1 | Smith (1935); Loveridge (1947)             |
| Gekkonidae | <i>Phelsuma comorensis</i>      | 1 | Smith (1935); Loveridge (1947)             |
| Gekkonidae | <i>Phelsuma dubia</i>           | 1 | Smith (1935); Loveridge (1947)             |
| Gekkonidae | <i>Phelsuma edwardnewtoni</i>   | 1 | Smith (1935); Loveridge (1947)             |
| Gekkonidae | <i>Phelsuma flavigularis</i>    | 1 | Smith (1935); Loveridge (1947)             |
| Gekkonidae | <i>Phelsuma gigas</i>           | 1 | Smith (1935); Loveridge (1947)             |
| Gekkonidae | <i>Phelsuma guentheri</i>       | 1 | Smith (1935); Loveridge (1947)             |
| Gekkonidae | <i>Phelsuma guimbeaui</i>       | 1 | Smith (1935); Loveridge (1947); Zug (2013) |
| Gekkonidae | <i>Phelsuma guttata</i>         | 1 | Smith (1935); Loveridge (1947)             |
| Gekkonidae | <i>Phelsuma hielscheri</i>      | 1 | Smith (1935); Loveridge (1947)             |
| Gekkonidae | <i>Phelsuma inexpectata</i>     | 1 | Smith (1935); Loveridge (1947)             |
| Gekkonidae | <i>Phelsuma kely</i>            | 1 | Smith (1935); Loveridge (1947)             |
| Gekkonidae | <i>Phelsuma klemmeri</i>        | 1 | Smith (1935); Loveridge (1947)             |
| Gekkonidae | <i>Phelsuma laticauda</i>       | 1 | Smith (1935); Loveridge (1947); Zug (2013) |
| Gekkonidae | <i>Phelsuma lineata</i>         | 1 | Smith (1935); Loveridge (1947)             |

|            |                                         |   |                                |
|------------|-----------------------------------------|---|--------------------------------|
| Gekkonidae | <i>Phelsuma madagascariensis</i>        | 1 | Smith (1935); Loveridge (1947) |
| Gekkonidae | <i>Phelsuma malamakibo</i>              | 1 | Smith (1935); Loveridge (1947) |
| Gekkonidae | <i>Phelsuma modesta</i>                 | 1 | Smith (1935); Loveridge (1947) |
| Gekkonidae | <i>Phelsuma mutabilis</i>               | 1 | Smith (1935); Loveridge (1947) |
| Gekkonidae | <i>Phelsuma nigristriata</i>            | 1 | Smith (1935); Loveridge (1947) |
| Gekkonidae | <i>Phelsuma ornata</i>                  | 1 | Smith (1935); Loveridge (1947) |
| Gekkonidae | <i>Phelsuma parkeri</i>                 | 1 | Smith (1935); Loveridge (1947) |
| Gekkonidae | <i>Phelsuma pronki</i>                  | 1 | Smith (1935); Loveridge (1947) |
| Gekkonidae | <i>Phelsuma pusilla</i>                 | 1 | Smith (1935); Loveridge (1947) |
| Gekkonidae | <i>Phelsuma quadriocellata</i>          | 1 | Smith (1935); Loveridge (1947) |
| Gekkonidae | <i>Phelsuma ravenala</i>                | 1 | Smith (1935); Loveridge (1947) |
| Gekkonidae | <i>Phelsuma robertmertensi</i>          | 1 | Smith (1935); Loveridge (1947) |
| Gekkonidae | <i>Phelsuma seippi</i>                  | 1 | Smith (1935); Loveridge (1947) |
| Gekkonidae | <i>Phelsuma serraticauda</i>            | 1 | Smith (1935); Loveridge (1947) |
| Gekkonidae | <i>Phelsuma standingi</i>               | 1 | Smith (1935); Loveridge (1947) |
| Gekkonidae | <i>Phelsuma sundbergi</i>               | 1 | Smith (1935); Loveridge (1947) |
| Gekkonidae | <i>Phelsuma vanheygeni</i>              | 1 | Smith (1935); Loveridge (1947) |
| Gekkonidae | <i>Pseudoceramodactylus khobarensis</i> | 0 | Arnold (1977)                  |
| Gekkonidae | <i>Pseudogekko compressicorpus</i>      | 1 | Taylor (1922)                  |
| Gekkonidae | <i>Pseudogekko smaragdinus</i>          | 1 | Taylor (1922)                  |
| Gekkonidae | <i>Ptenopus carpi</i>                   | 0 | Kluge and Nussbaum (1995)      |
| Gekkonidae | <i>Ptychozoon kuhli</i>                 | 1 | Smith (1935)                   |
| Gekkonidae | <i>Ptychozoon lionotum</i>              | 1 | Smith (1935)                   |
| Gekkonidae | <i>Ptychozoon rhacophorus</i>           | 1 | Boulenger (1899)               |
| Gekkonidae | <i>Rhoptropella ocellata</i>            | 1 | Loveridge (1947)               |
| Gekkonidae | <i>Rhoptropus afer</i>                  | 0 | Loveridge (1947)               |
| Gekkonidae | <i>Rhoptropus barnardi</i>              | 1 | Loveridge (1947)               |
| Gekkonidae | <i>Rhoptropus biporosus</i>             | 1 | Branch (2004)                  |
| Gekkonidae | <i>Rhoptropus boultoni</i>              | 1 | Loveridge (1947)               |
| Gekkonidae | <i>Rhoptropus bradfieldi</i>            | 0 | Loveridge (1947)               |
| Gekkonidae | <i>Stenodactylus arabicus</i>           | 0 | Arnold (1980)                  |
| Gekkonidae | <i>Stenodactylus doriae</i>             | 1 | Arnold (1980)                  |
| Gekkonidae | <i>Stenodactylus leptocosymbotus</i>    | 1 | Arnold (1980)                  |
| Gekkonidae | <i>Stenodactylus petrii</i>             | 0 | Arnold (1980)                  |

|                |                                         |   |                                                |
|----------------|-----------------------------------------|---|------------------------------------------------|
| Gekkonidae     | <i>Stenodactylus sthenodactylus</i>     | 0 | Arnold (1980)                                  |
| Gekkonidae     | <i>Stenodactylus yemenensis</i>         | 1 | Arnold (1980)                                  |
| Gekkonidae     | <i>Tropicolotes helenae</i>             | 0 | Karamian and Rastegar-Pouyani (2012)           |
| Gekkonidae     | <i>Tropicolotes tripolitanus</i>        | 0 | Boulenger (1885)                               |
| Gekkonidae     | <i>Urocotyledon inexpectata</i>         | 0 | Kluge and Nussbaum (1995)                      |
| Gekkonidae     | <i>Uroplatus alluaudi</i>               | 0 | Kluge and Nussbaum (1995); Bauer et al. (1997) |
| Gekkonidae     | <i>Uroplatus eburni</i>                 | 0 | Kluge and Nussbaum (1995); Bauer et al. (1997) |
| Gekkonidae     | <i>Uroplatus fimbriatus</i>             | 0 | Kluge and Nussbaum (1995); Bauer et al. (1997) |
| Gekkonidae     | <i>Uroplatus giganteus</i>              | 0 | Kluge and Nussbaum (1995); Bauer et al. (1997) |
| Gekkonidae     | <i>Uroplatus guentheri</i>              | 0 | Kluge and Nussbaum (1995); Bauer et al. (1997) |
| Gekkonidae     | <i>Uroplatus henkeli</i>                | 0 | Kluge and Nussbaum (1995); Bauer et al. (1997) |
| Gekkonidae     | <i>Uroplatus lineatus</i>               | 0 | Kluge and Nussbaum (1995); Bauer et al. (1997) |
| Gekkonidae     | <i>Uroplatus malahelo</i>               | 0 | Kluge and Nussbaum (1995); Bauer et al. (1997) |
| Gekkonidae     | <i>Uroplatus malama</i>                 | 0 | Kluge and Nussbaum (1995); Bauer et al. (1997) |
| Gekkonidae     | <i>Uroplatus phantasticus</i>           | 0 | Kluge and Nussbaum (1995); Bauer et al. (1997) |
| Gekkonidae     | <i>Uroplatus pietschmanni</i>           | 0 | Kluge and Nussbaum (1995); Bauer et al. (1997) |
| Gekkonidae     | <i>Uroplatus sikorae</i>                | 0 | Kluge and Nussbaum (1995); Bauer et al. (1997) |
| Gerrhosauridae | <i>Cordylus subtaeniatus</i>            | 1 | Branch (1998)                                  |
| Gerrhosauridae | <i>Gerrhosaurus flavigularis</i>        | 1 | Bates et al. (2013)                            |
| Gerrhosauridae | <i>Gerrhosaurus major</i>               | 1 | Bates et al. (2013)                            |
| Gerrhosauridae | <i>Gerrhosaurus multilineatus</i>       | 1 | Bates et al. (2013)                            |
| Gerrhosauridae | <i>Gerrhosaurus nigrolineatus</i>       | 1 | Bates et al. (2013)                            |
| Gerrhosauridae | <i>Gerrhosaurus skoogi</i>              | 1 | Bates et al. (2013)                            |
| Gerrhosauridae | <i>Gerrhosaurus typicus</i>             | 1 | Bates et al. (2013)                            |
| Gerrhosauridae | <i>Gerrhosaurus validus</i>             | 1 | Bates et al. (2013)                            |
| Gerrhosauridae | <i>Tetradactylus africanus</i>          | 1 | Hewitt (1915)                                  |
| Gerrhosauridae | <i>Tetradactylus seps</i>               | 1 | Hewitt (1915)                                  |
| Gerrhosauridae | <i>Tetradactylus tetradactylus</i>      | 1 | Hewitt (1915)                                  |
| Gerrhosauridae | <i>Tracheloptychus madagascariensis</i> | 1 | Boulenger (1887)                               |
| Gerrhosauridae | <i>Tracheloptychus petersi</i>          | 1 | Boulenger (1887)                               |
| Gerrhosauridae | <i>Zonosaurus aeneus</i>                | 1 | Vences et al. (1996)                           |
| Gerrhosauridae | <i>Zonosaurus anelanelany</i>           | 1 | Raselimanana et al. (2000)                     |
| Gerrhosauridae | <i>Zonosaurus bemaraha</i>              | 1 | Raselimanana et al. (2000)                     |

|                  |                                     |   |                                          |
|------------------|-------------------------------------|---|------------------------------------------|
| Gerrhosauridae   | <i>Zonosaurus boettgeri</i>         | 1 | Raselimanana et al. (2006)               |
| Gerrhosauridae   | <i>Zonosaurus brygooi</i>           | 1 | Vences et al. (1996)                     |
| Gerrhosauridae   | <i>Zonosaurus haraldmeieri</i>      | 1 | Glaw and Vences (1994)                   |
| Gerrhosauridae   | <i>Zonosaurus karsteni</i>          | 1 | Glaw and Vences (1994)                   |
| Gerrhosauridae   | <i>Zonosaurus laticaudatus</i>      | 1 | Glaw and Vences (1994)                   |
| Gerrhosauridae   | <i>Zonosaurus madagascariensis</i>  | 1 | Boulenger (1887)                         |
| Gerrhosauridae   | <i>Zonosaurus ornatus</i>           | 1 | Boulenger (1887)                         |
| Gerrhosauridae   | <i>Zonosaurus quadrilineatus</i>    | 1 | Boulenger (1887)                         |
| Gerrhosauridae   | <i>Zonosaurus rufipes</i>           | 1 | Boulenger (1887)                         |
| Gerrhosauridae   | <i>Zonosaurus subunicolor</i>       | 1 | Vences et al. (1996)                     |
| Gerrhosauridae   | <i>Zonosaurus trilineatus</i>       | 1 | Glaw and Vences (1994)                   |
| Gerrhosauridae   | <i>Zonosaurus tsingy</i>            | 1 | Raselimanana et al. (2000)               |
| Gymnophthalmidae | <i>Alopoglossus angulatus</i>       | 1 | Avila-Pires (1995); Köhler et al. (2012) |
| Gymnophthalmidae | <i>Alopoglossus atriventris</i>     | 1 | Avila-Pires (1995); Köhler et al. (2012) |
| Gymnophthalmidae | <i>Alopoglossus copii</i>           | 1 | Köhler et al. (2012)                     |
| Gymnophthalmidae | <i>Anotosaura collaris</i>          | 1 | Peloso et al. (2011)                     |
| Gymnophthalmidae | <i>Arthrosaura kockii</i>           | 1 | Avila-Pires (1995); Peloso et al. (2011) |
| Gymnophthalmidae | <i>Arthrosaura reticulata</i>       | 1 | Avila-Pires (1995); Peloso et al. (2011) |
| Gymnophthalmidae | <i>Bachia barbouri</i>              | 1 | Teixeira et al. (2013)                   |
| Gymnophthalmidae | <i>Bachia bicolor</i>               | 1 | Teixeira et al. (2013)                   |
| Gymnophthalmidae | <i>Bachia bresslaui</i>             | 1 | Rodrigues (2008)                         |
| Gymnophthalmidae | <i>Bachia dorbignyi</i>             | 1 | Avila-Pires (1995)                       |
| Gymnophthalmidae | <i>Bachia flavescens</i>            | 1 | Avila-Pires (1995)                       |
| Gymnophthalmidae | <i>Bachia heteropa</i>              | 1 | Boulenger (1903)                         |
| Gymnophthalmidae | <i>Bachia huallagana</i>            | 1 | Teixeira et al. (2013)                   |
| Gymnophthalmidae | <i>Bachia intermedia</i>            | 1 | Teixeira et al. (2013)                   |
| Gymnophthalmidae | <i>Bachia panoplia</i>              | 1 | Avila-Pires (1995)                       |
| Gymnophthalmidae | <i>Bachia peruana</i>               | 1 | Avila-Pires (1995)                       |
| Gymnophthalmidae | <i>Bachia scolecoides</i>           | 1 | Rodrigues (2008)                         |
| Gymnophthalmidae | <i>Bachia trisanale</i>             | 1 | Teixeira et al. (2013)                   |
| Gymnophthalmidae | <i>Calyptommatus confusionibus</i>  | 1 | Rodrigues et al. (2001)                  |
| Gymnophthalmidae | <i>Calyptommatus leiolepis</i>      | 1 | Rodrigues (1991)                         |
| Gymnophthalmidae | <i>Calyptommatus nicterus</i>       | 1 | Rodrigues (1991)                         |
| Gymnophthalmidae | <i>Calyptommatus sinebrachiatus</i> | 1 | Rodrigues (1991)                         |
| Gymnophthalmidae | <i>Cercosaura argulus</i>           | 1 | Doan (2003)                              |
| Gymnophthalmidae | <i>Cercosaura eigenmanni</i>        | 1 | Doan (2003)                              |
| Gymnophthalmidae | <i>Cercosaura ocellata</i>          | 1 | Avila-Pires (1995); Doan (2003)          |



|                  |                                   |   |                                                                             |
|------------------|-----------------------------------|---|-----------------------------------------------------------------------------|
| Gymnophthalmidae | <i>Cercosaura oshaughnessyi</i>   | 1 | Doan (2003)                                                                 |
| Gymnophthalmidae | <i>Cercosaura quadrilineata</i>   | 1 | Doan (2003)                                                                 |
| Gymnophthalmidae | <i>Cercosaura schreibersii</i>    | 1 | Doan and Lamar (2012)                                                       |
| Gymnophthalmidae | <i>Colobodactylus dalcyanus</i>   | 1 | Rodrigues et al. (2007)                                                     |
| Gymnophthalmidae | <i>Colobodactylus taunayi</i>     | 1 | Rodrigues et al. (2007)                                                     |
| Gymnophthalmidae | <i>Colobosaura mentalis</i>       | 1 | Avila-Pires (1995)                                                          |
| Gymnophthalmidae | <i>Colobosaura modesta</i>        | 1 | Avila-Pires (1995)                                                          |
| Gymnophthalmidae | <i>Colobosauroides cearensis</i>  | 1 | Avila-Pires (1995)                                                          |
| Gymnophthalmidae | <i>Ecpleopus gaudichaudii</i>     | 1 | Peloso et al. (2011)                                                        |
| Gymnophthalmidae | <i>Gymnophthalmus cryptus</i>     | 1 | Hoogmoed et al. (1992)                                                      |
| Gymnophthalmidae | <i>Gymnophthalmus leucomystax</i> | 1 | Hoogmoed et al. (1992)                                                      |
| Gymnophthalmidae | <i>Gymnophthalmus pleei</i>       | 1 | Hoogmoed et al. (1992)                                                      |
| Gymnophthalmidae | <i>Gymnophthalmus speciosus</i>   | 1 | Hoogmoed et al. (1992)                                                      |
| Gymnophthalmidae | <i>Gymnophthalmus underwoodi</i>  | 1 | Avila-Pires (1995)                                                          |
| Gymnophthalmidae | <i>Gymnophthalmus vanzoi</i>      | 1 | Rodrigues et al. (2009)                                                     |
| Gymnophthalmidae | <i>Heterodactylus imbricatus</i>  | 1 | Rodrigues (2009)                                                            |
| Gymnophthalmidae | <i>Iphisa elegans</i>             | 1 | Avila-Pires (1995)                                                          |
| Gymnophthalmidae | <i>Leposoma annectans</i>         | 1 | Rodrigues and Avila-Pires (2005); Peloso et al. (2011)                      |
| Gymnophthalmidae | <i>Leposoma baturitensis</i>      | 1 | Peloso et al. (2011)                                                        |
| Gymnophthalmidae | <i>Leposoma guianense</i>         | 1 | Avila-Pires (1995); Rodrigues and Avilla-Pires (2005); Peloso et al. (2011) |
| Gymnophthalmidae | <i>Leposoma nanodactylus</i>      | 1 | Peloso et al. (2011)                                                        |
| Gymnophthalmidae | <i>Leposoma osvaldoi</i>          | 1 | Avila-Pires (1995); Rodrigues and Avilla-Pires (2005); Peloso et al. (2011) |
| Gymnophthalmidae | <i>Leposoma parietale</i>         | 1 | Avila-Pires (1995); Peloso et al. (2011)                                    |
| Gymnophthalmidae | <i>Leposoma percarinatum</i>      | 1 | Avila-Pires (1995); Rodrigues and Avilla-Pires (2005); Peloso et al. (2011) |
| Gymnophthalmidae | <i>Leposoma puk</i>               | 1 | Rodrigues and Avila-Pires (2005); Peloso et al. (2011)                      |
| Gymnophthalmidae | <i>Leposoma scincoides</i>        | 1 | Rodrigues and Avila-Pires (2005); Peloso et al. (2011)                      |
| Gymnophthalmidae | <i>Leposoma southi</i>            | 1 | Rodrigues and Avila-Pires (2005); Peloso et al. (2011)                      |
| Gymnophthalmidae | <i>Micrablepharus atticolus</i>   | 1 | Rodrigues (1996)                                                            |
| Gymnophthalmidae | <i>Micrablepharus maximiliani</i> | 1 | Avila-Pires (1995)                                                          |
| Gymnophthalmidae | <i>Neusticurus bicarinatus</i>    | 1 | Avila-Pires (1995)                                                          |
| Gymnophthalmidae | <i>Neusticurus rudis</i>          | 1 | Avila-Pires (1995)                                                          |

|                  |                                       |   |                                                                         |
|------------------|---------------------------------------|---|-------------------------------------------------------------------------|
| Gymnophthalmidae | <i>Nothobachia ablephara</i>          | 1 | Rodrigues (1984)                                                        |
| Gymnophthalmidae | <i>Petracola ventrimaculatus</i>      | 1 | Boulenger (1900)                                                        |
| Gymnophthalmidae | <i>Pholidobolus macbrydei</i>         | 1 | Montanucci (1973)                                                       |
| Gymnophthalmidae | <i>Pholidobolus montium</i>           | 0 | Boulenger (1885); Montanucci (1973)                                     |
| Gymnophthalmidae | <i>Placosoma cordylinum</i>           | 1 | Uzzel (1959)                                                            |
| Gymnophthalmidae | <i>Placosoma glabellum</i>            | 1 | Uzzel (1959)                                                            |
| Gymnophthalmidae | <i>Potamites ecpleopus</i>            | 1 | Cope (1876)                                                             |
| Gymnophthalmidae | <i>Potamites juruazensis</i>          | 1 | Avila-Pires and Vitt (1998)                                             |
| Gymnophthalmidae | <i>Procellosaurinus erythrocerus</i>  | 1 | Rodrigues et al. (2009)                                                 |
| Gymnophthalmidae | <i>Procellosaurinus tetradactylus</i> | 1 | Rodrigues et al. (2005)                                                 |
| Gymnophthalmidae | <i>Proctoporus bolivianus</i>         | 1 | Goicoechea et al. (2013)                                                |
| Gymnophthalmidae | <i>Proctoporus guentheri</i>          | 1 | Boutther (1891)                                                         |
| Gymnophthalmidae | <i>Proctoporus pachyurus</i>          | 1 | Doan et al. (2005)                                                      |
| Gymnophthalmidae | <i>Proctoporus subsolanus</i>         | 1 | Goicoechea et al. (2013)                                                |
| Gymnophthalmidae | <i>Proctoporus sucullucu</i>          | 1 | Doan and Castoe (2003)                                                  |
| Gymnophthalmidae | <i>Proctoporus unsaaca</i>            | 1 | Doan and Castoe (2003)                                                  |
| Gymnophthalmidae | <i>Psilophthalmus paeminus</i>        | 1 | Rodrigues (1991)                                                        |
| Gymnophthalmidae | <i>Ptychoglossus brevifrontalis</i>   | 1 | Uzzel (1969); Avila-Pires (1995)                                        |
| Gymnophthalmidae | <i>Rhachisaurus brachylepis</i>       | 1 | Dixon (1974)                                                            |
| Gymnophthalmidae | <i>Riama colomaromani</i>             | 1 | Doan and Castoe (2005)                                                  |
| Gymnophthalmidae | <i>Riama simoterus</i>                | 1 | Doan and Castoe (2005)                                                  |
| Gymnophthalmidae | <i>Riama unicolor</i>                 | 1 | Doan and Castoe (2005)                                                  |
| Gymnophthalmidae | <i>Stenolepis ridleyi</i>             | 1 | Boulenger (1887)                                                        |
| Gymnophthalmidae | <i>Tretioscincus agilis</i>           | 1 | Avila-Pires (1995)                                                      |
| Gymnophthalmidae | <i>Tretioscincus oriximinensis</i>    | 1 | Avila-Pires (1995)                                                      |
| Gymnophthalmidae | <i>Vanzosaura rubricauda</i>          | 1 | Recoder et al. (2013)                                                   |
| Helodermatidae   | <i>Heloderma horridum</i>             | 0 | Camp (1923); Estes et al. (1988); Jullien and Renous-Lécuru (1972,1973) |
| Helodermatidae   | <i>Heloderma suspectum</i>            | 0 | Camp (1923); Estes et al. (1988); Jullien and Renous-Lécuru (1972,1973) |
| Hoplocercidae    | <i>Enyalioides heterolepis</i>        | 1 | Boulenger (1885)                                                        |
| Hoplocercidae    | <i>Enyalioides laticeps</i>           | 1 | Avila-Pires (1996)                                                      |
| Hoplocercidae    | <i>Enyalioides microlepis</i>         | 1 | Boulenger (1885)                                                        |

|               |                                   |   |                                                                               |
|---------------|-----------------------------------|---|-------------------------------------------------------------------------------|
| Hoplocercidae | <i>Enyalioides oshaughnessyi</i>  | 1 | Boulenger (1885)                                                              |
| Hoplocercidae | <i>Enyalioides palpebralis</i>    | 0 | Boulenger (1885); Avila-Pires (1996); Torres-Carvajal et al. (2011)           |
| Hoplocercidae | <i>Enyalioides praestabilis</i>   | 1 | Torres-Carvajal et al. (2011)                                                 |
| Hoplocercidae | <i>Hoplocercus spinosus</i>       | 1 | Torres-Carvajal et al. (2011)                                                 |
| Hoplocercidae | <i>Morunasaurus annularis</i>     | 1 | Torres-Carvajal et al. (2011)                                                 |
| Iguanidae     | <i>Amblyrhynchus cristatus</i>    | 0 | Estes et al (1988); Etheridge and de Quieroz (1988); Vitt and Caldwell (2014) |
| Iguanidae     | <i>Brachylophus fasciatus</i>     | 0 | Estes et al (1988); Etheridge and de Quieroz (1988); Vitt and Caldwell (2014) |
| Iguanidae     | <i>Brachylophus vitiensis</i>     | 0 | Estes et al (1988); Etheridge and de Quieroz (1988); Vitt and Caldwell (2014) |
| Iguanidae     | <i>Conolophus pallidus</i>        | 0 | Estes et al (1988); Etheridge and de Quieroz (1988); Vitt and Caldwell (2014) |
| Iguanidae     | <i>Conolophus subcristatus</i>    | 0 | Estes et al (1988); Etheridge and de Quieroz (1988); Vitt and Caldwell (2014) |
| Iguanidae     | <i>Ctenosaura acanthura</i>       | 0 | Estes et al (1988); Etheridge and de Quieroz (1988); Vitt and Caldwell (2014) |
| Iguanidae     | <i>Ctenosaura bakeri</i>          | 0 | Estes et al (1988); Etheridge and de Quieroz (1988); Vitt and Caldwell (2014) |
| Iguanidae     | <i>Ctenosaura flavidorsalis</i>   | 0 | Estes et al (1988); Etheridge and de Quieroz (1988); Vitt and Caldwell (2014) |
| Iguanidae     | <i>Ctenosaura hemilopha</i>       | 0 | Estes et al (1988); Etheridge and de Quieroz (1988); Vitt and Caldwell (2014) |
| Iguanidae     | <i>Ctenosaura melanosterna</i>    | 0 | Estes et al (1988); Etheridge and de Quieroz (1988); Vitt and Caldwell (2014) |
| Iguanidae     | <i>Ctenosaura oaxacana</i>        | 0 | Estes et al (1988); Etheridge and de Quieroz (1988); Vitt and Caldwell (2014) |
| Iguanidae     | <i>Ctenosaura oedirhina</i>       | 0 | Estes et al (1988); Etheridge and de Quieroz (1988); Vitt and Caldwell (2014) |
| Iguanidae     | <i>Ctenosaura palearis</i>        | 0 | Estes et al (1988); Etheridge and de Quieroz (1988); Vitt and Caldwell (2014) |
| Iguanidae     | <i>Ctenosaura pectinata</i>       | 0 | Estes et al (1988); Etheridge and de Quieroz (1988); Vitt and Caldwell (2014) |
| Iguanidae     | <i>Ctenosaura quinquecarinata</i> | 0 | Estes et al (1988); Etheridge and de Quieroz (1988); Vitt and Caldwell (2014) |
| Iguanidae     | <i>Ctenosaura similis</i>         | 0 | Estes et al (1988); Etheridge and de Quieroz (1988); Vitt and Caldwell (2014) |
| Iguanidae     | <i>Cyclura carinata</i>           | 0 | Estes et al (1988); Etheridge and de Quieroz (1988); Vitt and Caldwell (2014) |
| Iguanidae     | <i>Cyclura collei</i>             | 0 | Estes et al (1988); Etheridge and de Quieroz (1988); Vitt and Caldwell (2014) |
| Iguanidae     | <i>Cyclura cornuta</i>            | 0 | Estes et al (1988); Etheridge and de Quieroz (1988); Vitt and Caldwell (2014) |
| Iguanidae     | <i>Cyclura cychlura</i>           | 0 | Estes et al (1988); Etheridge and de Quieroz (1988); Vitt and Caldwell (2014) |
| Iguanidae     | <i>Cyclura nubila</i>             | 0 | Estes et al (1988); Etheridge and de Quieroz (1988); Vitt and Caldwell (2014) |
| Iguanidae     | <i>Cyclura pinguis</i>            | 0 | Estes et al (1988); Etheridge and de Quieroz (1988); Vitt and Caldwell (2014) |
| Iguanidae     | <i>Cyclura ricordi</i>            | 0 | Estes et al (1988); Etheridge and de Quieroz (1988); Vitt and Caldwell (2014) |
| Iguanidae     | <i>Cyclura rileyi</i>             | 0 | Estes et al (1988); Etheridge and de Quieroz (1988); Vitt and Caldwell (2014) |
| Iguanidae     | <i>Dipsosaurus</i>                | 0 | Estes et al (1988); Etheridge and de Quieroz (1988); Vitt                     |

|            |                                         |   |                                                                               |
|------------|-----------------------------------------|---|-------------------------------------------------------------------------------|
|            | <i>dorsalis</i>                         |   | and Caldwell (2014)                                                           |
| Iguanidae  | <i>Iguana delicatissima</i>             | 0 | Estes et al (1988); Etheridge and de Quieroz (1988); Vitt and Caldwell (2014) |
| Iguanidae  | <i>Iguana iguana</i>                    | 0 | Estes et al (1988); Etheridge and de Quieroz (1988); Vitt and Caldwell (2014) |
| Iguanidae  | <i>Sauromalus ater</i>                  | 0 | Estes et al (1988); Etheridge and de Quieroz (1988); Vitt and Caldwell (2014) |
| Iguanidae  | <i>Sauromalus hispidus</i>              | 0 | Estes et al (1988); Etheridge and de Quieroz (1988); Vitt and Caldwell (2014) |
| Iguanidae  | <i>Sauromalus klauberi</i>              | 0 | Estes et al (1988); Etheridge and de Quieroz (1988); Vitt and Caldwell (2014) |
| Iguanidae  | <i>Sauromalus varius</i>                | 0 | Estes et al (1988); Etheridge and de Quieroz (1988); Vitt and Caldwell (2014) |
| Lacertidae | <i>Acanthodactylus aureus</i>           | 1 | Baeckens et al. (2015)                                                        |
| Lacertidae | <i>Acanthodactylus beershebensis</i>    | 1 | Baeckens et al. (2015)                                                        |
| Lacertidae | <i>Acanthodactylus blanci</i>           | 1 | Baeckens et al. (2015)                                                        |
| Lacertidae | <i>Acanthodactylus boskianus</i>        | 1 | Baeckens et al. (2015)                                                        |
| Lacertidae | <i>Acanthodactylus busacki</i>          | 1 | Baeckens et al. (2015)                                                        |
| Lacertidae | <i>Acanthodactylus cantoris</i>         | 1 | Baeckens et al. (2015)                                                        |
| Lacertidae | <i>Acanthodactylus erythrurus</i>       | 1 | Baeckens et al. (2015)                                                        |
| Lacertidae | <i>Acanthodactylus gongrorhynchatus</i> | 1 | Baeckens et al. (2015)                                                        |
| Lacertidae | <i>Acanthodactylus longipes</i>         | 1 | Baeckens et al. (2015)                                                        |
| Lacertidae | <i>Acanthodactylus maculatus</i>        | 1 | Baeckens et al. (2015)                                                        |
| Lacertidae | <i>Acanthodactylus masirae</i>          | 1 | Baeckens et al. (2015)                                                        |
| Lacertidae | <i>Acanthodactylus opheodurus</i>       | 1 | Baeckens et al. (2015)                                                        |
| Lacertidae | <i>Acanthodactylus orientalis</i>       | 1 | Baeckens et al. (2015)                                                        |
| Lacertidae | <i>Acanthodactylus pardalis</i>         | 1 | Baeckens et al. (2015)                                                        |
| Lacertidae | <i>Acanthodactylus schmidtii</i>        | 1 | Baeckens et al. (2015)                                                        |
| Lacertidae | <i>Acanthodactylus schreiberi</i>       | 1 | Baeckens et al. (2015)                                                        |
| Lacertidae | <i>Acanthodactylus scutellatus</i>      | 1 | Baeckens et al. (2015)                                                        |
| Lacertidae | <i>Acanthodactylus tristrami</i>        | 1 | Baeckens et al. (2015)                                                        |
| Lacertidae | <i>Adolfus africanus</i>                | 1 | Baeckens et al. (2015)                                                        |
| Lacertidae | <i>Adolfus alleni</i>                   | 1 | Baeckens et al. (2015)                                                        |
| Lacertidae | <i>Adolfus jacksoni</i>                 | 1 | Baeckens et al. (2015)                                                        |
| Lacertidae | <i>Algyroides fitzingeri</i>            | 1 | Baeckens et al. (2015)                                                        |
| Lacertidae | <i>Algyroides marchi</i>                | 1 | Baeckens et al. (2015)                                                        |
| Lacertidae | <i>Algyroides moreoticus</i>            | 1 | Baeckens et al. (2015)                                                        |
| Lacertidae | <i>Algyroides</i>                       | 1 | Baeckens et al. (2015)                                                        |

|            |                                   |   |                        |
|------------|-----------------------------------|---|------------------------|
|            | <i>nigropunctatus</i>             |   |                        |
| Lacertidae | <i>Anatololacerta anatolica</i>   | 1 | Baeckens et al. (2015) |
| Lacertidae | <i>Anatololacerta danfordi</i>    | 1 | Baeckens et al. (2015) |
| Lacertidae | <i>Anatololacerta oertzeni</i>    | 1 | Baeckens et al. (2015) |
| Lacertidae | <i>Apathya cappadocica</i>        | 1 | Baeckens et al. (2015) |
| Lacertidae | <i>Archaeolacerta bedriagae</i>   | 1 | Baeckens et al. (2015) |
| Lacertidae | <i>Atlantolacerta andreanskyi</i> | 1 | Baeckens et al. (2015) |
| Lacertidae | <i>Congolacerta vauereselli</i>   | 1 | Baeckens et al. (2015) |
| Lacertidae | <i>Dalmatolacerta oxycephala</i>  | 1 | Baeckens et al. (2015) |
| Lacertidae | <i>Darevskia alpina</i>           | 1 | Baeckens et al. (2015) |
| Lacertidae | <i>Darevskia armeniaca</i>        | 1 | Baeckens et al. (2015) |
| Lacertidae | <i>Darevskia bendimahiensis</i>   | 1 | Baeckens et al. (2015) |
| Lacertidae | <i>Darevskia brauneri</i>         | 1 | Baeckens et al. (2015) |
| Lacertidae | <i>Darevskia caucasica</i>        | 1 | Baeckens et al. (2015) |
| Lacertidae | <i>Darevskia chlorogaster</i>     | 1 | Baeckens et al. (2015) |
| Lacertidae | <i>Darevskia clarkorum</i>        | 1 | Baeckens et al. (2015) |
| Lacertidae | <i>Darevskia daghestanica</i>     | 1 | Baeckens et al. (2015) |
| Lacertidae | <i>Darevskia derjugini</i>        | 1 | Baeckens et al. (2015) |
| Lacertidae | <i>Darevskia lindholmi</i>        | 1 | Baeckens et al. (2015) |
| Lacertidae | <i>Darevskia mixta</i>            | 1 | Baeckens et al. (2015) |
| Lacertidae | <i>Darevskia parvula</i>          | 1 | Baeckens et al. (2015) |
| Lacertidae | <i>Darevskia portschinskii</i>    | 1 | Baeckens et al. (2015) |
| Lacertidae | <i>Darevskia praticola</i>        | 1 | Baeckens et al. (2015) |
| Lacertidae | <i>Darevskia raddei</i>           | 1 | Baeckens et al. (2015) |
| Lacertidae | <i>Darevskia rostombekovi</i>     | 1 | Baeckens et al. (2015) |
| Lacertidae | <i>Darevskia rudis</i>            | 1 | Baeckens et al. (2015) |
| Lacertidae | <i>Darevskia sapphirina</i>       | 1 | Baeckens et al. (2015) |
| Lacertidae | <i>Darevskia saxicola</i>         | 1 | Baeckens et al. (2015) |
| Lacertidae | <i>Darevskia uzzelli</i>          | 1 | Baeckens et al. (2015) |
| Lacertidae | <i>Darevskia valentini</i>        | 1 | Baeckens et al. (2015) |
| Lacertidae | <i>Dinarolacerta montenegrina</i> | 1 | Baeckens et al. (2015) |
| Lacertidae | <i>Dinarolacerta mosorensis</i>   | 1 | Baeckens et al. (2015) |
| Lacertidae | <i>Eremias argus</i>              | 1 | Baeckens et al. (2015) |
| Lacertidae | <i>Eremias arguta</i>             | 1 | Baeckens et al. (2015) |
| Lacertidae | <i>Eremias brenchleyi</i>         | 1 | Baeckens et al. (2015) |

|            |                               |   |                        |
|------------|-------------------------------|---|------------------------|
| Lacertidae | <i>Eremias grammica</i>       | 1 | Baeckens et al. (2015) |
| Lacertidae | <i>Eremias montanus</i>       | 1 | Baeckens et al. (2015) |
| Lacertidae | <i>Eremias multiocellata</i>  | 1 | Baeckens et al. (2015) |
| Lacertidae | <i>Eremias nigrolateralis</i> | 1 | Baeckens et al. (2015) |
| Lacertidae | <i>Eremias persica</i>        | 1 | Baeckens et al. (2015) |
| Lacertidae | <i>Eremias pleskei</i>        | 1 | Baeckens et al. (2015) |
| Lacertidae | <i>Eremias przewalskii</i>    | 1 | Baeckens et al. (2015) |
| Lacertidae | <i>Eremias velox</i>          | 1 | Baeckens et al. (2015) |
| Lacertidae | <i>Eremias vermiculata</i>    | 1 | Baeckens et al. (2015) |
| Lacertidae | <i>Gallotia atlantica</i>     | 1 | Baeckens et al. (2015) |
| Lacertidae | <i>Gallotia caesaris</i>      | 1 | Baeckens et al. (2015) |
| Lacertidae | <i>Gallotia galloti</i>       | 1 | Baeckens et al. (2015) |
| Lacertidae | <i>Gallotia gomerana</i>      | 1 | Baeckens et al. (2015) |
| Lacertidae | <i>Gallotia intermedia</i>    | 1 | Baeckens et al. (2015) |
| Lacertidae | <i>Gallotia simonyi</i>       | 1 | Baeckens et al. (2015) |
| Lacertidae | <i>Gallotia stehlini</i>      | 1 | Baeckens et al. (2015) |
| Lacertidae | <i>Gastropholis prasina</i>   | 1 | Baeckens et al. (2015) |
| Lacertidae | <i>Gastropholis vittata</i>   | 1 | Baeckens et al. (2015) |
| Lacertidae | <i>Heliobolus lugubris</i>    | 1 | Baeckens et al. (2015) |
| Lacertidae | <i>Heliobolus spekii</i>      | 1 | Baeckens et al. (2015) |
| Lacertidae | <i>Hellenolacerta graeca</i>  | 1 | Baeckens et al. (2015) |
| Lacertidae | <i>Holaspis guentheri</i>     | 1 | Baeckens et al. (2015) |
| Lacertidae | <i>Holaspis laevis</i>        | 1 | Baeckens et al. (2015) |
| Lacertidae | <i>Iberolacerta aranica</i>   | 1 | Baeckens et al. (2015) |
| Lacertidae | <i>Iberolacerta aurelioi</i>  | 1 | Baeckens et al. (2015) |
| Lacertidae | <i>Iberolacerta bonnali</i>   | 1 | Baeckens et al. (2015) |
| Lacertidae | <i>Iberolacerta cyreni</i>    | 1 | Baeckens et al. (2015) |
| Lacertidae | <i>Iberolacerta galani</i>    | 1 | Baeckens et al. (2015) |
| Lacertidae | <i>Iberolacerta horvathi</i>  | 1 | Baeckens et al. (2015) |
| Lacertidae | <i>Iberolacerta monticola</i> | 1 | Baeckens et al. (2015) |
| Lacertidae | <i>Ichnotropis capensis</i>   | 1 | Baeckens et al. (2015) |
| Lacertidae | <i>Iranolacerta brandtii</i>  | 1 | Baeckens et al. (2015) |
| Lacertidae | <i>Iranolacerta zagrosica</i> | 1 | Baeckens et al. (2015) |
| Lacertidae | <i>Lacerta agilis</i>         | 1 | Baeckens et al. (2015) |
| Lacertidae | <i>Lacerta bilineata</i>      | 1 | Baeckens et al. (2015) |
| Lacertidae | <i>Lacerta media</i>          | 1 | Baeckens et al. (2015) |
| Lacertidae | <i>Lacerta pamphylica</i>     | 1 | Baeckens et al. (2015) |
| Lacertidae | <i>Lacerta schreiberi</i>     | 1 | Baeckens et al. (2015) |

|            |                                |   |                        |
|------------|--------------------------------|---|------------------------|
| Lacertidae | <i>Lacerta strigata</i>        | 1 | Baeckens et al. (2015) |
| Lacertidae | <i>Lacerta trilineata</i>      | 1 | Baeckens et al. (2015) |
| Lacertidae | <i>Lacerta viridis</i>         | 1 | Baeckens et al. (2015) |
| Lacertidae | <i>Latastia longicaudata</i>   | 1 | Baeckens et al. (2015) |
| Lacertidae | <i>Meroles anchietae</i>       | 0 | Baeckens et al. (2015) |
| Lacertidae | <i>Meroles australis</i>       | 1 | Baeckens et al. (2015) |
| Lacertidae | <i>Meroles ctenodactylus</i>   | 1 | Baeckens et al. (2015) |
| Lacertidae | <i>Meroles cuneirostris</i>    | 1 | Baeckens et al. (2015) |
| Lacertidae | <i>Meroles knoxii</i>          | 1 | Baeckens et al. (2015) |
| Lacertidae | <i>Meroles micropholidotus</i> | 1 | Baeckens et al. (2015) |
| Lacertidae | <i>Meroles reticulatus</i>     | 1 | Baeckens et al. (2015) |
| Lacertidae | <i>Meroles squamulosa</i>      | 1 | Baeckens et al. (2015) |
| Lacertidae | <i>Meroles suborbitalis</i>    | 1 | Baeckens et al. (2015) |
| Lacertidae | <i>Mesalina adramitana</i>     | 1 | Baeckens et al. (2015) |
| Lacertidae | <i>Mesalina bahaeldini</i>     | 1 | Baeckens et al. (2015) |
| Lacertidae | <i>Mesalina balfouri</i>       | 1 | Baeckens et al. (2015) |
| Lacertidae | <i>Mesalina brevirostris</i>   | 1 | Baeckens et al. (2015) |
| Lacertidae | <i>Mesalina guttulata</i>      | 1 | Baeckens et al. (2015) |
| Lacertidae | <i>Mesalina olivieri</i>       | 1 | Baeckens et al. (2015) |
| Lacertidae | <i>Mesalina rubropunctata</i>  | 1 | Baeckens et al. (2015) |
| Lacertidae | <i>Mesalina simoni</i>         | 1 | Baeckens et al. (2015) |
| Lacertidae | <i>Nucras lalandii</i>         | 1 | Baeckens et al. (2015) |
| Lacertidae | <i>Nucras tessellata</i>       | 1 | Baeckens et al. (2015) |
| Lacertidae | <i>Omanosaura cyanura</i>      | 1 | Baeckens et al. (2015) |
| Lacertidae | <i>Omanosaura jayakari</i>     | 1 | Baeckens et al. (2015) |
| Lacertidae | <i>Ophisops elegans</i>        | 1 | Baeckens et al. (2015) |
| Lacertidae | <i>Ophisops occidentalis</i>   | 1 | Baeckens et al. (2015) |
| Lacertidae | <i>Parvilacerta fraasii</i>    | 1 | Baeckens et al. (2015) |
| Lacertidae | <i>Parvilacerta parva</i>      | 1 | Baeckens et al. (2015) |
| Lacertidae | <i>Pedioplanis breviceps</i>   | 1 | Baeckens et al. (2015) |
| Lacertidae | <i>Pedioplanis burchelli</i>   | 1 | Baeckens et al. (2015) |
| Lacertidae | <i>Pedioplanis gaerdesi</i>    | 1 | Baeckens et al. (2015) |
| Lacertidae | <i>Pedioplanis husabensis</i>  | 1 | Baeckens et al. (2015) |
| Lacertidae | <i>Pedioplanis inornata</i>    | 1 | Baeckens et al. (2015) |
| Lacertidae | <i>Pedioplanis laticeps</i>    | 1 | Baeckens et al. (2015) |

|            |                                    |   |                        |
|------------|------------------------------------|---|------------------------|
| Lacertidae | <i>Pedioplanis lineocellata</i>    | 1 | Baeckens et al. (2015) |
| Lacertidae | <i>Pedioplanis namaquensis</i>     | 1 | Baeckens et al. (2015) |
| Lacertidae | <i>Pedioplanis rubens</i>          | 1 | Baeckens et al. (2015) |
| Lacertidae | <i>Pedioplanis undata</i>          | 1 | Baeckens et al. (2015) |
| Lacertidae | <i>Philochortus spinalis</i>       | 1 | Baeckens et al. (2015) |
| Lacertidae | <i>Phoenicolacerta cyanisparsa</i> | 1 | Baeckens et al. (2015) |
| Lacertidae | <i>Phoenicolacerta kulzeri</i>     | 1 | Baeckens et al. (2015) |
| Lacertidae | <i>Phoenicolacerta laevis</i>      | 1 | Baeckens et al. (2015) |
| Lacertidae | <i>Podarcis atrata</i>             | 1 | Baeckens et al. (2015) |
| Lacertidae | <i>Podarcis bocagei</i>            | 1 | Baeckens et al. (2015) |
| Lacertidae | <i>Podarcis carbonelli</i>         | 1 | Baeckens et al. (2015) |
| Lacertidae | <i>Podarcis erhardii</i>           | 1 | Baeckens et al. (2015) |
| Lacertidae | <i>Podarcis filfolensis</i>        | 1 | Baeckens et al. (2015) |
| Lacertidae | <i>Podarcis gaigeae</i>            | 1 | Baeckens et al. (2015) |
| Lacertidae | <i>Podarcis hispanicus</i>         | 1 | Baeckens et al. (2015) |
| Lacertidae | <i>Podarcis lilfordi</i>           | 1 | Baeckens et al. (2015) |
| Lacertidae | <i>Podarcis melisellensis</i>      | 1 | Baeckens et al. (2015) |
| Lacertidae | <i>Podarcis milensis</i>           | 1 | Baeckens et al. (2015) |
| Lacertidae | <i>Podarcis muralis</i>            | 1 | Baeckens et al. (2015) |
| Lacertidae | <i>Podarcis peloponnesiacus</i>    | 1 | Baeckens et al. (2015) |
| Lacertidae | <i>Podarcis pityusensis</i>        | 1 | Baeckens et al. (2015) |
| Lacertidae | <i>Podarcis raffonei</i>           | 1 | Baeckens et al. (2015) |
| Lacertidae | <i>Podarcis siculus</i>            | 1 | Baeckens et al. (2015) |
| Lacertidae | <i>Podarcis tauricus</i>           | 1 | Baeckens et al. (2015) |
| Lacertidae | <i>Podarcis tiliguerta</i>         | 1 | Baeckens et al. (2015) |
| Lacertidae | <i>Podarcis vaucheri</i>           | 1 | Baeckens et al. (2015) |
| Lacertidae | <i>Poromera fordii</i>             | 1 | Baeckens et al. (2015) |
| Lacertidae | <i>Psammodromus algirus</i>        | 1 | Baeckens et al. (2015) |
| Lacertidae | <i>Psammodromus blanci</i>         | 1 | Baeckens et al. (2015) |
| Lacertidae | <i>Psammodromus hispanicus</i>     | 1 | Baeckens et al. (2015) |
| Lacertidae | <i>Pseuderemias smithii</i>        | 1 | Baeckens et al. (2015) |
| Lacertidae | <i>Takydromus amurensis</i>        | 1 | Baeckens et al. (2015) |
| Lacertidae | <i>Takydromus dorsalis</i>         | 1 | Baeckens et al. (2015) |
| Lacertidae | <i>Takydromus formosanus</i>       | 1 | Baeckens et al. (2015) |
| Lacertidae | <i>Takydromus hsuehshanensis</i>   | 1 | Baeckens et al. (2015) |
| Lacertidae | <i>Takydromus</i>                  | 1 | Baeckens et al. (2015) |



|                |                                   |   |                                                                                                   |
|----------------|-----------------------------------|---|---------------------------------------------------------------------------------------------------|
|                | <i>intermedius</i>                |   |                                                                                                   |
| Lacertidae     | <i>Takydromus kuehnei</i>         | 1 | Baeckens et al. (2015)                                                                            |
| Lacertidae     | <i>Takydromus sauteri</i>         | 1 | Baeckens et al. (2015)                                                                            |
| Lacertidae     | <i>Takydromus septentrionalis</i> | 1 | Baeckens et al. (2015)                                                                            |
| Lacertidae     | <i>Takydromus sexlineatus</i>     | 1 | Baeckens et al. (2015)                                                                            |
| Lacertidae     | <i>Takydromus smaragdinus</i>     | 1 | Baeckens et al. (2015)                                                                            |
| Lacertidae     | <i>Takydromus stejnegeri</i>      | 1 | Baeckens et al. (2015)                                                                            |
| Lacertidae     | <i>Takydromus sylvaticus</i>      | 1 | Baeckens et al. (2015)                                                                            |
| Lacertidae     | <i>Takydromus tachydromoides</i>  | 1 | Baeckens et al. (2015)                                                                            |
| Lacertidae     | <i>Takydromus toyamai</i>         | 1 | Baeckens et al. (2015)                                                                            |
| Lacertidae     | <i>Takydromus wolteri</i>         | 1 | Baeckens et al. (2015)                                                                            |
| Lacertidae     | <i>Teira dugesii</i>              | 1 | Baeckens et al. (2015)                                                                            |
| Lacertidae     | <i>Teira perspicillata</i>        | 1 | Baeckens et al. (2015)                                                                            |
| Lacertidae     | <i>Timon lepidus</i>              | 1 | Baeckens et al. (2015)                                                                            |
| Lacertidae     | <i>Timon pater</i>                | 1 | Baeckens et al. (2015)                                                                            |
| Lacertidae     | <i>Timon princeps</i>             | 1 | Baeckens et al. (2015)                                                                            |
| Lacertidae     | <i>Timon tangitanus</i>           | 1 | Baeckens et al. (2015)                                                                            |
| Lacertidae     | <i>Tropidosaura gularis</i>       | 1 | Baeckens et al. (2015)                                                                            |
| Lacertidae     | <i>Zootoca vivipara</i>           | 1 | Baeckens et al. (2015)                                                                            |
| Lanthanotidae  | <i>Lanthanotus borneensis</i>     | 0 | Camp (1923); Booker and Bogert (1954); Estes et al. (1988); Jullien and Renous-Lécure (1972,1973) |
| Leiocephalidae | <i>Leiocephalus barahonensis</i>  | 0 | Vitt and Caldwell (2014)                                                                          |
| Leiocephalidae | <i>Leiocephalus carinatus</i>     | 0 | Vitt and Caldwell (2014)                                                                          |
| Leiocephalidae | <i>Leiocephalus personatus</i>    | 0 | Vitt and Caldwell (2014)                                                                          |
| Leiocephalidae | <i>Leiocephalus psammodromus</i>  | 0 | Vitt and Caldwell (2014)                                                                          |
| Leiocephalidae | <i>Leiocephalus raviceps</i>      | 0 | Vitt and Caldwell (2014)                                                                          |
| Leiocephalidae | <i>Leiocephalus schreibersii</i>  | 0 | Vitt and Caldwell (2014)                                                                          |
| Leiosauridae   | <i>Anisolepis longicauda</i>      | 0 | Boulenger (1891); Vitt and Caldwell (2014)                                                        |
| Leiosauridae   | <i>Diplolaemus darwinii</i>       | 0 | Boulenger (1885); Vitt and Caldwell (2014)                                                        |
| Leiosauridae   | <i>Enyalius bilineatus</i>        | 0 | Avila-Pires (1995); Vitt and Caldwell (2014)                                                      |
| Leiosauridae   | <i>Enyalius leechii</i>           | 0 | Avila-Pires (1995); Vitt and Caldwell (2014)                                                      |
| Leiosauridae   | <i>Leiosaurus bellii</i>          | 0 | Boulenger (1885); Vitt and Caldwell (2014)                                                        |
| Leiosauridae   | <i>Leiosaurus catamarcensis</i>   | 0 | Boulenger (1885); Vitt and Caldwell (2014)                                                        |
| Leiosauridae   | <i>Leiosaurus paronae</i>         | 0 | Boulenger (1885); Vitt and Caldwell (2014)                                                        |
| Leiosauridae   | <i>Pristidactylus scapulatus</i>  | 0 | Etheridge and Williams (1985); Vitt and Caldwell (2014)                                           |

|              |                                   |   |                                                         |
|--------------|-----------------------------------|---|---------------------------------------------------------|
| Leiosauridae | <i>Pristidactylus torquatus</i>   | 0 | Etheridge and Williams (1985); Vitt and Caldwell (2014) |
| Leiosauridae | <i>Urostrophus gallardoi</i>      | 0 | Etheridge and Williams (1991); Vitt and Caldwell (2014) |
| Leiosauridae | <i>Urostrophus vautieri</i>       | 0 | Etheridge and Williams (1991); Vitt and Caldwell (2014) |
| Liolaemidae  | <i>Ctenoblepharys adspersa</i>    | 1 | Escobar et al. (2001)                                   |
| Liolaemidae  | <i>Liolaemus abaucan</i>          | 1 | Escobar et al. (2001)                                   |
| Liolaemidae  | <i>Liolaemus albiceps</i>         | 1 | Escobar et al. (2001)                                   |
| Liolaemidae  | <i>Liolaemus andinus</i>          | 1 | Escobar et al. (2001)                                   |
| Liolaemidae  | <i>Liolaemus archeoforus</i>      | 1 | Escobar et al. (2001)                                   |
| Liolaemidae  | <i>Liolaemus atacamensis</i>      | 1 | Escobar et al. (2001)                                   |
| Liolaemidae  | <i>Liolaemus audituvelatus</i>    | 1 | Escobar et al. (2001)                                   |
| Liolaemidae  | <i>Liolaemus austromendocinus</i> | 1 | Escobar et al. (2001)                                   |
| Liolaemidae  | <i>Liolaemus azarai</i>           | 1 | Escobar et al. (2001)                                   |
| Liolaemidae  | <i>Liolaemus baguali</i>          | 1 | Escobar et al. (2001)                                   |
| Liolaemidae  | <i>Liolaemus bellii</i>           | 1 | Escobar et al. (2001)                                   |
| Liolaemidae  | <i>Liolaemus bibronii</i>         | 1 | Escobar et al. (2001)                                   |
| Liolaemidae  | <i>Liolaemus bitaeniatus</i>      | 1 | Escobar et al. (2001)                                   |
| Liolaemidae  | <i>Liolaemus boulengeri</i>       | 1 | Escobar et al. (2001)                                   |
| Liolaemidae  | <i>Liolaemus buergeri</i>         | 1 | Escobar et al. (2001)                                   |
| Liolaemidae  | <i>Liolaemus calchaqui</i>        | 1 | Escobar et al. (2001)                                   |
| Liolaemidae  | <i>Liolaemus canqueli</i>         | 1 | Escobar et al. (2001)                                   |
| Liolaemidae  | <i>Liolaemus capillitas</i>       | 1 | Escobar et al. (2001)                                   |
| Liolaemidae  | <i>Liolaemus ceii</i>             | 1 | Escobar et al. (2001)                                   |
| Liolaemidae  | <i>Liolaemus chacoensis</i>       | 1 | Escobar et al. (2001)                                   |
| Liolaemidae  | <i>Liolaemus chaltin</i>          | 1 | Escobar et al. (2001)                                   |
| Liolaemidae  | <i>Liolaemus chehuachekenk</i>    | 1 | Escobar et al. (2001)                                   |
| Liolaemidae  | <i>Liolaemus chiliensis</i>       | 1 | Escobar et al. (2001)                                   |
| Liolaemidae  | <i>Liolaemus coeruleus</i>        | 1 | Escobar et al. (2001)                                   |
| Liolaemidae  | <i>Liolaemus crepuscularis</i>    | 1 | Escobar et al. (2001)                                   |
| Liolaemidae  | <i>Liolaemus cuyanus</i>          | 1 | Escobar et al. (2001)                                   |
| Liolaemidae  | <i>Liolaemus cyanogaster</i>      | 1 | Escobar et al. (2001)                                   |
| Liolaemidae  | <i>Liolaemus darwinii</i>         | 1 | Escobar et al. (2001)                                   |
| Liolaemidae  | <i>Liolaemus dicktracy</i>        | 1 | Escobar et al. (2001)                                   |
| Liolaemidae  | <i>Liolaemus donosobarrosi</i>    | 1 | Escobar et al. (2001)                                   |
| Liolaemidae  | <i>Liolaemus dorbignyi</i>        | 1 | Escobar et al. (2001)                                   |
| Liolaemidae  | <i>Liolaemus elongatus</i>        | 1 | Escobar et al. (2001)                                   |

|             |                                 |   |                       |
|-------------|---------------------------------|---|-----------------------|
| Liolaemidae | <i>Liolaemus escarchadosi</i>   | 1 | Escobar et al. (2001) |
| Liolaemidae | <i>Liolaemus espinozai</i>      | 1 | Escobar et al. (2001) |
| Liolaemidae | <i>Liolaemus fabiani</i>        | 1 | Escobar et al. (2001) |
| Liolaemidae | <i>Liolaemus famatinae</i>      | 1 | Escobar et al. (2001) |
| Liolaemidae | <i>Liolaemus fitzingerii</i>    | 1 | Escobar et al. (2001) |
| Liolaemidae | <i>Liolaemus fuscus</i>         | 1 | Escobar et al. (2001) |
| Liolaemidae | <i>Liolaemus gallardoi</i>      | 1 | Escobar et al. (2001) |
| Liolaemidae | <i>Liolaemus gracilis</i>       | 1 | Escobar et al. (2001) |
| Liolaemidae | <i>Liolaemus gravenhorstii</i>  | 1 | Escobar et al. (2001) |
| Liolaemidae | <i>Liolaemus grosseorum</i>     | 1 | Escobar et al. (2001) |
| Liolaemidae | <i>Liolaemus hatcheri</i>       | 1 | Escobar et al. (2001) |
| Liolaemidae | <i>Liolaemus heliodermis</i>    | 1 | Escobar et al. (2001) |
| Liolaemidae | <i>Liolaemus hermannunezi</i>   | 1 | Escobar et al. (2001) |
| Liolaemidae | <i>Liolaemus hernani</i>        | 1 | Escobar et al. (2001) |
| Liolaemidae | <i>Liolaemus huacahuasicus</i>  | 1 | Escobar et al. (2001) |
| Liolaemidae | <i>Liolaemus inacayali</i>      | 1 | Escobar et al. (2001) |
| Liolaemidae | <i>Liolaemus irregularis</i>    | 1 | Escobar et al. (2001) |
| Liolaemidae | <i>Liolaemus kingii</i>         | 1 | Escobar et al. (2001) |
| Liolaemidae | <i>Liolaemus kolengh</i>        | 1 | Escobar et al. (2001) |
| Liolaemidae | <i>Liolaemus koslowskyi</i>     | 1 | Escobar et al. (2001) |
| Liolaemidae | <i>Liolaemus kriegi</i>         | 1 | Escobar et al. (2001) |
| Liolaemidae | <i>Liolaemus laurenti</i>       | 1 | Escobar et al. (2001) |
| Liolaemidae | <i>Liolaemus lavillai</i>       | 1 | Escobar et al. (2001) |
| Liolaemidae | <i>Liolaemus lemniscatus</i>    | 1 | Escobar et al. (2001) |
| Liolaemidae | <i>Liolaemus leopardinus</i>    | 1 | Escobar et al. (2001) |
| Liolaemidae | <i>Liolaemus lineomaculatus</i> | 1 | Escobar et al. (2001) |
| Liolaemidae | <i>Liolaemus lutzae</i>         | 1 | Escobar et al. (2001) |
| Liolaemidae | <i>Liolaemus magellanicus</i>   | 1 | Escobar et al. (2001) |
| Liolaemidae | <i>Liolaemus melanops</i>       | 1 | Escobar et al. (2001) |
| Liolaemidae | <i>Liolaemus molinai</i>        | 1 | Escobar et al. (2001) |
| Liolaemidae | <i>Liolaemus monticola</i>      | 1 | Escobar et al. (2001) |
| Liolaemidae | <i>Liolaemus morenoi</i>        | 1 | Escobar et al. (2001) |
| Liolaemidae | <i>Liolaemus multicolor</i>     | 1 | Escobar et al. (2001) |
| Liolaemidae | <i>Liolaemus multimaculatus</i> | 1 | Escobar et al. (2001) |
| Liolaemidae | <i>Liolaemus nigromaculatus</i> | 1 | Escobar et al. (2001) |

|             |                                    |   |                       |
|-------------|------------------------------------|---|-----------------------|
| Liolaemidae | <i>Liolaemus nigroviridis</i>      | 1 | Escobar et al. (2001) |
| Liolaemidae | <i>Liolaemus nitidus</i>           | 1 | Escobar et al. (2001) |
| Liolaemidae | <i>Liolaemus occipitalis</i>       | 1 | Escobar et al. (2001) |
| Liolaemidae | <i>Liolaemus olongasta</i>         | 1 | Escobar et al. (2001) |
| Liolaemidae | <i>Liolaemus orientalis</i>        | 1 | Escobar et al. (2001) |
| Liolaemidae | <i>Liolaemus ornatus</i>           | 1 | Escobar et al. (2001) |
| Liolaemidae | <i>Liolaemus pagaburoi</i>         | 1 | Escobar et al. (2001) |
| Liolaemidae | <i>Liolaemus paulinae</i>          | 1 | Escobar et al. (2001) |
| Liolaemidae | <i>Liolaemus petrophilus</i>       | 1 | Escobar et al. (2001) |
| Liolaemidae | <i>Liolaemus pictus</i>            | 1 | Escobar et al. (2001) |
| Liolaemidae | <i>Liolaemus platei</i>            | 1 | Escobar et al. (2001) |
| Liolaemidae | <i>Liolaemus pseudoanomalus</i>    | 1 | Escobar et al. (2001) |
| Liolaemidae | <i>Liolaemus pseudolemniscatus</i> | 1 | Escobar et al. (2001) |
| Liolaemidae | <i>Liolaemus puna</i>              | 1 | Escobar et al. (2001) |
| Liolaemidae | <i>Liolaemus quilmes</i>           | 1 | Escobar et al. (2001) |
| Liolaemidae | <i>Liolaemus ramirezae</i>         | 1 | Escobar et al. (2001) |
| Liolaemidae | <i>Liolaemus reichei</i>           | 1 | Escobar et al. (2001) |
| Liolaemidae | <i>Liolaemus riojanus</i>          | 1 | Escobar et al. (2001) |
| Liolaemidae | <i>Liolaemus robertmertensi</i>    | 1 | Escobar et al. (2001) |
| Liolaemidae | <i>Liolaemus rothi</i>             | 1 | Escobar et al. (2001) |
| Liolaemidae | <i>Liolaemus ruibali</i>           | 1 | Escobar et al. (2001) |
| Liolaemidae | <i>Liolaemus salinicola</i>        | 1 | Escobar et al. (2001) |
| Liolaemidae | <i>Liolaemus sarmientoi</i>        | 1 | Escobar et al. (2001) |
| Liolaemidae | <i>Liolaemus saxatilis</i>         | 1 | Escobar et al. (2001) |
| Liolaemidae | <i>Liolaemus scapularis</i>        | 1 | Escobar et al. (2001) |
| Liolaemidae | <i>Liolaemus schroederi</i>        | 1 | Escobar et al. (2001) |
| Liolaemidae | <i>Liolaemus scholaroi</i>         | 1 | Escobar et al. (2001) |
| Liolaemidae | <i>Liolaemus silvanae</i>          | 1 | Escobar et al. (2001) |
| Liolaemidae | <i>Liolaemus somuncurae</i>        | 1 | Escobar et al. (2001) |
| Liolaemidae | <i>Liolaemus tari</i>              | 1 | Escobar et al. (2001) |
| Liolaemidae | <i>Liolaemus telsen</i>            | 1 | Escobar et al. (2001) |
| Liolaemidae | <i>Liolaemus tenuis</i>            | 1 | Escobar et al. (2001) |
| Liolaemidae | <i>Liolaemus thermarum</i>         | 1 | Escobar et al. (2001) |
| Liolaemidae | <i>Liolaemus tristis</i>           | 1 | Escobar et al. (2001) |
| Liolaemidae | <i>Liolaemus umbrifer</i>          | 1 | Escobar et al. (2001) |
| Liolaemidae | <i>Liolaemus uptoni</i>            | 1 | Escobar et al. (2001) |

|                 |                                    |   |                                            |
|-----------------|------------------------------------|---|--------------------------------------------|
| Liolaemidae     | <i>Liolaemus uspallatensis</i>     | 1 | Escobar et al. (2001)                      |
| Liolaemidae     | <i>Liolaemus vallecurensis</i>     | 1 | Escobar et al. (2001)                      |
| Liolaemidae     | <i>Liolaemus walkeri</i>           | 1 | Escobar et al. (2001)                      |
| Liolaemidae     | <i>Liolaemus wiegmanni</i>         | 1 | Escobar et al. (2001)                      |
| Liolaemidae     | <i>Liolaemus xanthoviridis</i>     | 1 | Escobar et al. (2001)                      |
| Liolaemidae     | <i>Liolaemus yanalco</i>           | 1 | Escobar et al. (2001)                      |
| Liolaemidae     | <i>Liolaemus zapallarensis</i>     | 1 | Escobar et al. (2001)                      |
| Liolaemidae     | <i>Liolaemus zuliyi</i>            | 1 | Escobar et al. (2001)                      |
| Liolaemidae     | <i>Phymaturus antofagastensis</i>  | 1 | Escobar et al. (2001)                      |
| Liolaemidae     | <i>Phymaturus dorsimaculatus</i>   | 1 | Escobar et al. (2001)                      |
| Liolaemidae     | <i>Phymaturus indistinctus</i>     | 1 | Escobar et al. (2001)                      |
| Liolaemidae     | <i>Phymaturus mallimaccii</i>      | 1 | Escobar et al. (2001)                      |
| Liolaemidae     | <i>Phymaturus palluma</i>          | 1 | Escobar et al. (2001)                      |
| Liolaemidae     | <i>Phymaturus patagonicus</i>      | 1 | Escobar et al. (2001)                      |
| Liolaemidae     | <i>Phymaturus punae</i>            | 1 | Escobar et al. (2001)                      |
| Liolaemidae     | <i>Phymaturus somuncurensis</i>    | 1 | Escobar et al. (2001)                      |
| Opluridae       | <i>Chalarodon madagascariensis</i> | 0 | Boulenger (1885); Vitt and Caldwell (2014) |
| Opluridae       | <i>Oplurus cuvieri</i>             | 0 | Boulenger (1885); Vitt and Caldwell (2014) |
| Opluridae       | <i>Oplurus cyclurus</i>            | 0 | Boulenger (1885); Vitt and Caldwell (2014) |
| Opluridae       | <i>Oplurus fierinensis</i>         | 0 | Boulenger (1885); Vitt and Caldwell (2014) |
| Opluridae       | <i>Oplurus grandidieri</i>         | 0 | Boulenger (1885); Vitt and Caldwell (2014) |
| Opluridae       | <i>Oplurus quadrimaculatus</i>     | 0 | Boulenger (1885); Vitt and Caldwell (2014) |
| Opluridae       | <i>Oplurus saxicola</i>            | 0 | Boulenger (1885); Vitt and Caldwell (2014) |
| Phrynosomatidae | <i>Petrosaurus mearnsi</i>         | 1 | Boulenger (1885)                           |
| Phrynosomatidae | <i>Petrosaurus repens</i>          | 1 | Boulenger (1885)                           |
| Phrynosomatidae | <i>Petrosaurus thalassinus</i>     | 1 | Boulenger (1885)                           |
| Phrynosomatidae | <i>Phrynosoma asio</i>             | 1 | Boulenger (1885)                           |
| Phrynosomatidae | <i>Phrynosoma blainvillii</i>      | 1 | Boulenger (1885)                           |
| Phrynosomatidae | <i>Phrynosoma braconnieri</i>      | 1 | Boulenger (1885)                           |
| Phrynosomatidae | <i>Phrynosoma cerroense</i>        | 1 | Boulenger (1885)                           |
| Phrynosomatidae | <i>Phrynosoma cornutum</i>         | 1 | Boulenger (1885)                           |
| Phrynosomatidae | <i>Phrynosoma coronatum</i>        | 1 | Boulenger (1885)                           |
| Phrynosomatidae | <i>Phrynosoma ditmarsii</i>        | 1 | Boulenger (1885)                           |

|                 |                                 |   |                  |
|-----------------|---------------------------------|---|------------------|
| Phrynosomatidae | <i>Phrynosoma douglassii</i>    | 1 | Boulenger (1885) |
| Phrynosomatidae | <i>Phrynosoma hernandesi</i>    | 1 | Boulenger (1885) |
| Phrynosomatidae | <i>Phrynosoma mcallii</i>       | 1 | Boulenger (1885) |
| Phrynosomatidae | <i>Phrynosoma modestum</i>      | 1 | Boulenger (1885) |
| Phrynosomatidae | <i>Phrynosoma orbiculare</i>    | 1 | Boulenger (1885) |
| Phrynosomatidae | <i>Phrynosoma platyrhinos</i>   | 1 | Boulenger (1885) |
| Phrynosomatidae | <i>Phrynosoma solare</i>        | 1 | Boulenger (1885) |
| Phrynosomatidae | <i>Phrynosoma taurus</i>        | 1 | Boulenger (1885) |
| Phrynosomatidae | <i>Phrynosoma wigginsi</i>      | 1 | Boulenger (1885) |
| Phrynosomatidae | <i>Sceloporus adleri</i>        | 1 | Boulenger (1885) |
| Phrynosomatidae | <i>Sceloporus aeneus</i>        | 1 | Boulenger (1885) |
| Phrynosomatidae | <i>Sceloporus angustus</i>      | 1 | Boulenger (1885) |
| Phrynosomatidae | <i>Sceloporus arenicolus</i>    | 1 | Boulenger (1885) |
| Phrynosomatidae | <i>Sceloporus bicanthalis</i>   | 1 | Boulenger (1885) |
| Phrynosomatidae | <i>Sceloporus bulleri</i>       | 1 | Boulenger (1885) |
| Phrynosomatidae | <i>Sceloporus carinatus</i>     | 1 | Boulenger (1885) |
| Phrynosomatidae | <i>Sceloporus cautus</i>        | 1 | Boulenger (1885) |
| Phrynosomatidae | <i>Sceloporus chaneysi</i>      | 1 | Boulenger (1885) |
| Phrynosomatidae | <i>Sceloporus chrysostictus</i> | 1 | Boulenger (1885) |
| Phrynosomatidae | <i>Sceloporus clarkii</i>       | 1 | Boulenger (1885) |
| Phrynosomatidae | <i>Sceloporus consobrinus</i>   | 1 | Boulenger (1885) |
| Phrynosomatidae | <i>Sceloporus couchii</i>       | 1 | Boulenger (1885) |
| Phrynosomatidae | <i>Sceloporus cozumelae</i>     | 1 | Boulenger (1885) |
| Phrynosomatidae | <i>Sceloporus cryptus</i>       | 1 | Boulenger (1885) |
| Phrynosomatidae | <i>Sceloporus cyanogenys</i>    | 1 | Boulenger (1885) |
| Phrynosomatidae | <i>Sceloporus dugesii</i>       | 1 | Boulenger (1885) |
| Phrynosomatidae | <i>Sceloporus edwardtaylori</i> | 1 | Boulenger (1885) |
| Phrynosomatidae | <i>Sceloporus formosus</i>      | 1 | Boulenger (1885) |
| Phrynosomatidae | <i>Sceloporus gadoviae</i>      | 1 | Boulenger (1885) |
| Phrynosomatidae | <i>Sceloporus goldmani</i>      | 1 | Boulenger (1885) |
| Phrynosomatidae | <i>Sceloporus graciosus</i>     | 1 | Boulenger (1885) |
| Phrynosomatidae | <i>Sceloporus grammicus</i>     | 1 | Boulenger (1885) |
| Phrynosomatidae | <i>Sceloporus grandaevus</i>    | 1 | Boulenger (1885) |
| Phrynosomatidae | <i>Sceloporus</i>               | 1 | Boulenger (1885) |

|                 |                                 |   |                  |
|-----------------|---------------------------------|---|------------------|
|                 | <i>heterolepis</i>              |   |                  |
| Phrynosomatidae | <i>Sceloporus horridus</i>      | 1 | Boulenger (1885) |
| Phrynosomatidae | <i>Sceloporus hunsakeri</i>     | 1 | Boulenger (1885) |
| Phrynosomatidae | <i>Sceloporus insignis</i>      | 1 | Boulenger (1885) |
| Phrynosomatidae | <i>Sceloporus jalapae</i>       | 1 | Boulenger (1885) |
| Phrynosomatidae | <i>Sceloporus jarrovii</i>      | 1 | Boulenger (1885) |
| Phrynosomatidae | <i>Sceloporus licki</i>         | 1 | Boulenger (1885) |
| Phrynosomatidae | <i>Sceloporus lineatulus</i>    | 1 | Boulenger (1885) |
| Phrynosomatidae | <i>Sceloporus lundelli</i>      | 1 | Boulenger (1885) |
| Phrynosomatidae | <i>Sceloporus macdougalli</i>   | 1 | Boulenger (1885) |
| Phrynosomatidae | <i>Sceloporus maculosus</i>     | 1 | Boulenger (1885) |
| Phrynosomatidae | <i>Sceloporus magister</i>      | 1 | Boulenger (1885) |
| Phrynosomatidae | <i>Sceloporus malachiticus</i>  | 1 | Boulenger (1885) |
| Phrynosomatidae | <i>Sceloporus megalepidurus</i> | 1 | Boulenger (1885) |
| Phrynosomatidae | <i>Sceloporus melanorhinus</i>  | 1 | Boulenger (1885) |
| Phrynosomatidae | <i>Sceloporus merriami</i>      | 1 | Boulenger (1885) |
| Phrynosomatidae | <i>Sceloporus minor</i>         | 1 | Boulenger (1885) |
| Phrynosomatidae | <i>Sceloporus mucronatus</i>    | 1 | Boulenger (1885) |
| Phrynosomatidae | <i>Sceloporus nelsoni</i>       | 1 | Boulenger (1885) |
| Phrynosomatidae | <i>Sceloporus occidentalis</i>  | 1 | Boulenger (1885) |
| Phrynosomatidae | <i>Sceloporus ochoterenae</i>   | 1 | Boulenger (1885) |
| Phrynosomatidae | <i>Sceloporus olivaceus</i>     | 1 | Boulenger (1885) |
| Phrynosomatidae | <i>Sceloporus orcutti</i>       | 1 | Boulenger (1885) |
| Phrynosomatidae | <i>Sceloporus ornatus</i>       | 1 | Boulenger (1885) |
| Phrynosomatidae | <i>Sceloporus palaciosi</i>     | 1 | Boulenger (1885) |
| Phrynosomatidae | <i>Sceloporus parvus</i>        | 1 | Boulenger (1885) |
| Phrynosomatidae | <i>Sceloporus poinsettii</i>    | 1 | Boulenger (1885) |
| Phrynosomatidae | <i>Sceloporus pyrocephalus</i>  | 1 | Boulenger (1885) |
| Phrynosomatidae | <i>Sceloporus samcolemani</i>   | 1 | Boulenger (1885) |
| Phrynosomatidae | <i>Sceloporus scalaris</i>      | 1 | Boulenger (1885) |
| Phrynosomatidae | <i>Sceloporus serrifer</i>      | 1 | Boulenger (1885) |
| Phrynosomatidae | <i>Sceloporus siniferus</i>     | 1 | Boulenger (1885) |
| Phrynosomatidae | <i>Sceloporus slevini</i>       | 1 | Boulenger (1885) |
| Phrynosomatidae | <i>Sceloporus smaragdinus</i>   | 1 | Boulenger (1885) |
| Phrynosomatidae | <i>Sceloporus smithi</i>        | 1 | Boulenger (1885) |
| Phrynosomatidae | <i>Sceloporus spinosus</i>      | 1 | Boulenger (1885) |

|                  |                                   |   |                                                   |
|------------------|-----------------------------------|---|---------------------------------------------------|
| Phrynosomatidae  | <i>Sceloporus squamosus</i>       | 1 | Boulenger (1885)                                  |
| Phrynosomatidae  | <i>Sceloporus stejnegeri</i>      | 1 | Boulenger (1885)                                  |
| Phrynosomatidae  | <i>Sceloporus subpictus</i>       | 1 | Boulenger (1885)                                  |
| Phrynosomatidae  | <i>Sceloporus taeniocnemis</i>    | 1 | Boulenger (1885)                                  |
| Phrynosomatidae  | <i>Sceloporus teapensis</i>       | 1 | Boulenger (1885)                                  |
| Phrynosomatidae  | <i>Sceloporus torquatus</i>       | 1 | Boulenger (1885)                                  |
| Phrynosomatidae  | <i>Sceloporus undulatus</i>       | 1 | Boulenger (1885)                                  |
| Phrynosomatidae  | <i>Sceloporus utiformis</i>       | 1 | Boulenger (1885)                                  |
| Phrynosomatidae  | <i>Sceloporus vandenburgianus</i> | 1 | Boulenger (1885)                                  |
| Phrynosomatidae  | <i>Sceloporus variabilis</i>      | 1 | Boulenger (1885)                                  |
| Phrynosomatidae  | <i>Sceloporus virgatus</i>        | 1 | Boulenger (1885)                                  |
| Phrynosomatidae  | <i>Sceloporus woodi</i>           | 1 | Boulenger (1885)                                  |
| Phrynosomatidae  | <i>Sceloporus zosteromus</i>      | 1 | Boulenger (1885)                                  |
| Phrynosomatidae  | <i>Uma exsul</i>                  | 1 | Schmidt and Bogert (1947)                         |
| Phrynosomatidae  | <i>Uma inornata</i>               | 1 | Heifetz (1941)                                    |
| Phrynosomatidae  | <i>Uma notata</i>                 | 1 | Grismer (2002)                                    |
| Phrynosomatidae  | <i>Uma paraphygas</i>             | 1 | Williams et al. (1959)                            |
| Phrynosomatidae  | <i>Uma scoparia</i>               | 1 | Heifetz (1941)                                    |
| Phrynosomatidae  | <i>Urosaurus auriculatus</i>      | 1 | Rau and Loomis (1977); Dixon (200)                |
| Phrynosomatidae  | <i>Urosaurus bicarinatus</i>      | 1 | Rau and Loomis (1977); Dixon (200)                |
| Phrynosomatidae  | <i>Urosaurus clarionensis</i>     | 1 | Rau and Loomis (1977); Dixon (200)                |
| Phrynosomatidae  | <i>Urosaurus gadovi</i>           | 1 | Rau and Loomis (1977); Dixon (200)                |
| Phrynosomatidae  | <i>Urosaurus graciosus</i>        | 1 | Rau and Loomis (1977); Dixon (200)                |
| Phrynosomatidae  | <i>Urosaurus lahtelai</i>         | 1 | Rau and Loomis (1977); Dixon (200)                |
| Phrynosomatidae  | <i>Urosaurus nigricaudus</i>      | 1 | Rau and Loomis (1977); Dixon (200)                |
| Phrynosomatidae  | <i>Urosaurus ornatus</i>          | 1 | Rau and Loomis (1977); Dixon (200)                |
| Phrynosomatidae  | <i>Uta palmeri</i>                | 1 | Boulenger (1885); Grismer (1994)                  |
| Phrynosomatidae  | <i>Uta squamata</i>               | 1 | Boulenger (1885); Grismer (1994)                  |
| Phrynosomatidae  | <i>Uta stansburiana</i>           | 1 | Boulenger (1885); Grismer (1994)                  |
| Phrynosomatidae  | <i>Uta stejnegeri</i>             | 1 | Boulenger (1885); Grismer (1994)                  |
| Phyllodactylidae | <i>Asaccus platyrhynchus</i>      | 0 | Bauer et al. (1997); Prasa and Oraie (2009)       |
| Phyllodactylidae | <i>Bogertia lutzae</i>            | 0 | Kluge and Nussbaum (1995)                         |
| Phyllodactylidae | <i>Haemodracon riebeckii</i>      | 0 | Bauer et al. (1997)                               |
| Phyllodactylidae | <i>Homonota andicola</i>          | 0 | Kluge and Nussbaum (1995); Carreira et al. (2005) |
| Phyllodactylidae | <i>Homonota borellii</i>          | 0 | Kluge and Nussbaum (1995); Carreira et al. (2005) |



|                  |                                         |   |                                                                                |
|------------------|-----------------------------------------|---|--------------------------------------------------------------------------------|
| Phyllodactylidae | <i>Homonota darwinii</i>                | 0 | Kluge and Nussbaum (1995); Carreira et al. (2005)                              |
| Phyllodactylidae | <i>Homonota fasciata</i>                | 0 | Kluge and Nussbaum (1995); Carreira et al. (2005)                              |
| Phyllodactylidae | <i>Homonota gaudichaudii</i>            | 0 | Kluge and Nussbaum (1995); Carreira et al. (2005)                              |
| Phyllodactylidae | <i>Homonota underwoodi</i>              | 0 | Kluge and Nussbaum (1995); Carreira et al. (2005)                              |
| Phyllodactylidae | <i>Phyllodactylus bordai</i>            | 0 | Smith (1935); Kluge and Nussbaum (1995); Bauer et al. (1997)                   |
| Phyllodactylidae | <i>Phyllodactylus bugastrolepis</i>     | 0 | Smith (1935); Kluge and Nussbaum (1995); Bauer et al. (1997)                   |
| Phyllodactylidae | <i>Phyllodactylus davisii</i>           | 0 | Smith (1935); Kluge and Nussbaum (1995); Bauer et al. (1997)                   |
| Phyllodactylidae | <i>Phyllodactylus delcampoi</i>         | 0 | Smith (1935); Kluge and Nussbaum (1995); Bauer et al. (1997)                   |
| Phyllodactylidae | <i>Phyllodactylus duellmani</i>         | 0 | Smith (1935); Kluge and Nussbaum (1995); Bauer et al. (1997)                   |
| Phyllodactylidae | <i>Phyllodactylus homolepidurus</i>     | 0 | Smith (1935); Kluge and Nussbaum (1995); Bauer et al. (1997)                   |
| Phyllodactylidae | <i>Phyllodactylus lanei</i>             | 0 | Smith (1935); Kluge and Nussbaum (1995); Bauer et al. (1997)                   |
| Phyllodactylidae | <i>Phyllodactylus nocticolus</i>        | 0 | Smith (1935); Kluge and Nussbaum (1995); Bauer et al. (1997)                   |
| Phyllodactylidae | <i>Phyllodactylus paucituberculatus</i> | 0 | Smith (1935); Kluge and Nussbaum (1995); Bauer et al. (1997)                   |
| Phyllodactylidae | <i>Phyllodactylus reissii</i>           | 0 | Smith (1935); Kluge and Nussbaum (1995); Bauer et al. (1997)                   |
| Phyllodactylidae | <i>Phyllodactylus tuberculosus</i>      | 0 | Smith (1935); Kluge and Nussbaum (1995); Bauer et al. (1997)                   |
| Phyllodactylidae | <i>Phyllodactylus unctus</i>            | 0 | Smith (1935); Kluge and Nussbaum (1995); Bauer et al. (1997)                   |
| Phyllodactylidae | <i>Phyllodactylus wirshingi</i>         | 0 | Smith (1935); Kluge and Nussbaum (1995); Bauer and Russel (2003)               |
| Phyllodactylidae | <i>Phyllodactylus xanti</i>             | 0 | Smith (1935); Kluge and Nussbaum (1995); Bauer et al. (1997)                   |
| Phyllodactylidae | <i>Phyllopezus maranjonensis</i>        | 0 | Koch et al. (2006)                                                             |
| Phyllodactylidae | <i>Phyllopezus periosus</i>             | 0 | Rodrigues (1986)                                                               |
| Phyllodactylidae | <i>Phyllopezus pollicaris</i>           | 0 | Boulenger (1885)                                                               |
| Phyllodactylidae | <i>Ptyodactylus guttatus</i>            | 0 | Smith (1935); Kluge and Nussbaum (1995); Bauer et al. (1997)                   |
| Phyllodactylidae | <i>Ptyodactylus hasselquistii</i>       | 0 | Smith (1935); Loveridge (1947); Kluge and Nussbaum (1995); Bauer et al. (1997) |
| Phyllodactylidae | <i>Ptyodactylus oudrii</i>              | 0 | Smith (1935); Kluge and Nussbaum (1995); Bauer et al. (1997)                   |
| Phyllodactylidae | <i>Ptyodactylus ragazzii</i>            | 0 | Smith (1935); Kluge and Nussbaum (1995); Bauer et al. (1997)                   |
| Phyllodactylidae | <i>Tarentola americana</i>              | 0 | Loveridge (1947); Kluge and Nussbaum (1995)                                    |
| Phyllodactylidae | <i>Tarentola angustimentalis</i>        | 0 | Loveridge (1947); Kluge and Nussbaum (1995)                                    |
| Phyllodactylidae | <i>Tarentola annularis</i>              | 0 | Loveridge (1947); Kluge and Nussbaum (1995)                                    |
| Phyllodactylidae | <i>Tarentola boehmei</i>                | 0 | Loveridge (1947); Kluge and Nussbaum (1995)                                    |
| Phyllodactylidae | <i>Tarentola boettgeri</i>              | 0 | Loveridge (1947); Kluge and Nussbaum (1995)                                    |
| Phyllodactylidae | <i>Tarentola caboverdianus</i>          | 0 | Loveridge (1947); Kluge and Nussbaum (1995)                                    |

|                  |                                  |   |                                               |
|------------------|----------------------------------|---|-----------------------------------------------|
| Phyllodactylidae | <i>Tarentola chazaliae</i>       | 0 | Loveridge (1947); Kluge and Nussbaum (1995)   |
| Phyllodactylidae | <i>Tarentola darwini</i>         | 0 | Loveridge (1947); Kluge and Nussbaum (1995)   |
| Phyllodactylidae | <i>Tarentola delalandii</i>      | 0 | Loveridge (1947); Kluge and Nussbaum (1995)   |
| Phyllodactylidae | <i>Tarentola deserti</i>         | 0 | Loveridge (1947); Kluge and Nussbaum (1995)   |
| Phyllodactylidae | <i>Tarentola ephippiata</i>      | 0 | Loveridge (1947); Kluge and Nussbaum (1995)   |
| Phyllodactylidae | <i>Tarentola gigas</i>           | 0 | Loveridge (1947); Kluge and Nussbaum (1995)   |
| Phyllodactylidae | <i>Tarentola gomerensis</i>      | 0 | Loveridge (1947); Kluge and Nussbaum (1995)   |
| Phyllodactylidae | <i>Tarentola mauritanica</i>     | 0 | Loveridge (1947); Kluge and Nussbaum (1995)   |
| Phyllodactylidae | <i>Tarentola mindiae</i>         | 0 | Loveridge (1947); Kluge and Nussbaum (1995)   |
| Phyllodactylidae | <i>Tarentola neglecta</i>        | 0 | Loveridge (1947); Kluge and Nussbaum (1995)   |
| Phyllodactylidae | <i>Tarentola rudis</i>           | 0 | Loveridge (1947); Kluge and Nussbaum (1995)   |
| Phyllodactylidae | <i>Thecadactylus rapicauda</i>   | 0 | Avila-Pires (1995); Kluge and Nussbaum (1995) |
| Phyllodactylidae | <i>Thecadactylus solimoensis</i> | 0 | Avila-Pires (1995); Kluge and Nussbaum (1995) |
| Polychrotidae    | <i>Polychrus acutirostris</i>    | 1 | Avila-Pires (1996)                            |
| Polychrotidae    | <i>Polychrus femoralis</i>       | 1 | Avila-Pires (1996)                            |
| Polychrotidae    | <i>Polychrus gutturosus</i>      | 1 | Avila-Pires (1996)                            |
| Polychrotidae    | <i>Polychrus marmoratus</i>      | 1 | Avila-Pires (1996)                            |
| Pygopodidae      | <i>Aprasia aurita</i>            | 0 | Kluge (1974); Kluge and Nussbaum (1995)       |
| Pygopodidae      | <i>Aprasia fusca</i>             | 0 | Kluge (1974); Kluge and Nussbaum (1995)       |
| Pygopodidae      | <i>Aprasia inaurita</i>          | 0 | Kluge (1974); Kluge and Nussbaum (1995)       |
| Pygopodidae      | <i>Aprasia parapulchella</i>     | 0 | Kluge (1974); Kluge and Nussbaum (1995)       |
| Pygopodidae      | <i>Aprasia picturata</i>         | 0 | Kluge (1974); Kluge and Nussbaum (1995)       |
| Pygopodidae      | <i>Aprasia pseudopulchella</i>   | 0 | Kluge (1974); Kluge and Nussbaum (1995)       |
| Pygopodidae      | <i>Aprasia pulchella</i>         | 0 | Kluge (1974); Kluge and Nussbaum (1995)       |
| Pygopodidae      | <i>Aprasia repens</i>            | 0 | Kluge (1974); Kluge and Nussbaum (1995)       |
| Pygopodidae      | <i>Aprasia smithi</i>            | 0 | Kluge (1974); Kluge and Nussbaum (1995)       |
| Pygopodidae      | <i>Aprasia striolata</i>         | 0 | Kluge (1974); Kluge and Nussbaum (1995)       |
| Pygopodidae      | <i>Delma australis</i>           | 0 | Kluge (1974); Kluge and Nussbaum (1995)       |
| Pygopodidae      | <i>Delma borea</i>               | 0 | Kluge (1974); Kluge and Nussbaum (1995)       |
| Pygopodidae      | <i>Delma butleri</i>             | 0 | Kluge (1974); Kluge and Nussbaum (1995)       |
| Pygopodidae      | <i>Delma concinna</i>            | 0 | Kluge (1974); Kluge and Nussbaum (1995)       |
| Pygopodidae      | <i>Delma fraseri</i>             | 0 | Kluge (1974); Kluge and Nussbaum (1995)       |
| Pygopodidae      | <i>Delma grayii</i>              | 0 | Kluge (1974); Kluge and Nussbaum (1995)       |
| Pygopodidae      | <i>Delma impar</i>               | 0 | Kluge (1974); Kluge and Nussbaum (1995)       |
| Pygopodidae      | <i>Delma inornata</i>            | 0 | Kluge (1974); Kluge and Nussbaum (1995)       |
| Pygopodidae      | <i>Delma labialis</i>            | 0 | Kluge (1974); Kluge and Nussbaum (1995)       |
| Pygopodidae      | <i>Delma mitella</i>             | 0 | Kluge (1974); Kluge and Nussbaum (1995)       |
| Pygopodidae      | <i>Delma mollerii</i>            | 0 | Kluge (1974); Kluge and Nussbaum (1995)       |
| Pygopodidae      | <i>Delma nasuta</i>              | 0 | Kluge (1974); Kluge and Nussbaum (1995)       |

|             |                                      |   |                                                                                                         |
|-------------|--------------------------------------|---|---------------------------------------------------------------------------------------------------------|
| Pygopodidae | <i>Delma pax</i>                     | 0 | Kluge (1974); Kluge and Nussbaum (1995)                                                                 |
| Pygopodidae | <i>Delma tincta</i>                  | 0 | Kluge (1974); Kluge and Nussbaum (1995)                                                                 |
| Pygopodidae | <i>Delma torquata</i>                | 0 | Kluge (1974); Kluge and Nussbaum (1995)                                                                 |
| Pygopodidae | <i>Lialis burtonis</i>               | 1 | Kluge (1974)                                                                                            |
| Pygopodidae | <i>Lialis jicari</i>                 | 1 | Kluge (1974)                                                                                            |
| Pygopodidae | <i>Ophidiocephalus taeniatus</i>     | 0 | Kluge (1974); Kluge and Nussbaum (1995)                                                                 |
| Pygopodidae | <i>Paradelma orientalis</i>          | 1 | Kluge (1974)                                                                                            |
| Pygopodidae | <i>Pletholax gracilis</i>            | 0 | Kluge (1974); Kluge and Nussbaum (1995)                                                                 |
| Pygopodidae | <i>Pygopus lepidopodus</i>           | 1 | Kluge (1974)                                                                                            |
| Pygopodidae | <i>Pygopus nigriceps</i>             | 1 | Kluge (1974)                                                                                            |
| Rhineuridae | <i>Rhineura floridana</i>            | 0 | Gans and Dowling (1967)                                                                                 |
| Scincidae   | <i>Ablepharus budaki</i>             | 0 | Camp 1923; Smith (1935); Jullien and Renous-Lécuru (1972,1973); Estes et al. (1988); Avila-Pires (1995) |
| Scincidae   | <i>Ablepharus chernovi</i>           | 0 | Camp 1923; Smith (1935); Jullien and Renous-Lécuru (1972,1973); Estes et al. (1988); Avila-Pires (1995) |
| Scincidae   | <i>Ablepharus kitaibelii</i>         | 0 | Camp 1923; Smith (1935); Jullien and Renous-Lécuru (1972,1973); Estes et al. (1988); Avila-Pires (1995) |
| Scincidae   | <i>Ablepharus pannonicus</i>         | 0 | Camp 1923; Smith (1935); Jullien and Renous-Lécuru (1972,1973); Estes et al. (1988); Avila-Pires (1995) |
| Scincidae   | <i>Acontias breviceps</i>            | 0 | Camp 1923; Smith (1935); Jullien and Renous-Lécuru (1972,1973); Estes et al. (1988); Avila-Pires (1995) |
| Scincidae   | <i>Acontias gracilicauda</i>         | 0 | Camp 1923; Smith (1935); Jullien and Renous-Lécuru (1972,1973); Estes et al. (1988); Avila-Pires (1995) |
| Scincidae   | <i>Acontias meleagris</i>            | 0 | Camp 1923; Smith (1935); Jullien and Renous-Lécuru (1972,1973); Estes et al. (1988); Avila-Pires (1995) |
| Scincidae   | <i>Acontias percivali</i>            | 0 | Camp 1923; Smith (1935); Jullien and Renous-Lécuru (1972,1973); Estes et al. (1988); Avila-Pires (1995) |
| Scincidae   | <i>Acontias plumbeus</i>             | 0 | Camp 1923; Smith (1935); Jullien and Renous-Lécuru (1972,1973); Estes et al. (1988); Avila-Pires (1995) |
| Scincidae   | <i>Acontias poecilus</i>             | 0 | Camp 1923; Smith (1935); Jullien and Renous-Lécuru (1972,1973); Estes et al. (1988); Avila-Pires (1995) |
| Scincidae   | <i>Acontophiops lineatus</i>         | 0 | Camp 1923; Smith (1935); Jullien and Renous-Lécuru (1972,1973); Estes et al. (1988); Avila-Pires (1995) |
| Scincidae   | <i>Afroablepharus africanus</i>      | 0 | Camp 1923; Smith (1935); Jullien and Renous-Lécuru (1972,1973); Estes et al. (1988); Avila-Pires (1995) |
| Scincidae   | <i>Afroablepharus annobonensis</i>   | 0 | Camp 1923; Smith (1935); Jullien and Renous-Lécuru (1972,1973); Estes et al. (1988); Avila-Pires (1995) |
| Scincidae   | <i>Afroablepharus wahlbergi</i>      | 0 | Camp 1923; Smith (1935); Jullien and Renous-Lécuru (1972,1973); Estes et al. (1988); Avila-Pires (1995) |
| Scincidae   | <i>Amphiglossus anosyensis</i>       | 0 | Camp 1923; Smith (1935); Jullien and Renous-Lécuru (1972,1973); Estes et al. (1988); Avila-Pires (1995) |
| Scincidae   | <i>Amphiglossus astrolabi</i>        | 0 | Camp 1923; Smith (1935); Jullien and Renous-Lécuru (1972,1973); Estes et al. (1988); Avila-Pires (1995) |
| Scincidae   | <i>Amphiglossus frontoparietalis</i> | 0 | Camp 1923; Smith (1935); Jullien and Renous-Lécuru (1972,1973); Estes et al. (1988); Avila-Pires (1995) |
| Scincidae   | <i>Amphiglossus macrocerus</i>       | 0 | Camp 1923; Smith (1935); Jullien and Renous-Lécuru (1972,1973); Estes et al. (1988); Avila-Pires (1995) |
| Scincidae   | <i>Amphiglossus mandokava</i>        | 0 | Camp 1923; Smith (1935); Jullien and Renous-Lécuru (1972,1973); Estes et al. (1988); Avila-Pires (1995) |
| Scincidae   | <i>Amphiglossus melanurus</i>        | 0 | Camp 1923; Smith (1935); Jullien and Renous-Lécuru (1972,1973); Estes et al. (1988); Avila-Pires (1995) |
| Scincidae   | <i>Amphiglossus nanus</i>            | 0 | Camp 1923; Smith (1935); Jullien and Renous-Lécuru (1972,1973); Estes et al. (1988); Avila-Pires (1995) |

|           |                                     |   |                                                                                                         |
|-----------|-------------------------------------|---|---------------------------------------------------------------------------------------------------------|
| Scincidae | <i>Amphiglossus ornateps</i>        | 0 | Camp 1923; Smith (1935); Jullien and Renous-Lécuru (1972,1973); Estes et al. (1988); Avila-Pires (1995) |
| Scincidae | <i>Amphiglossus polleni</i>         | 0 | Camp 1923; Smith (1935); Jullien and Renous-Lécuru (1972,1973); Estes et al. (1988); Avila-Pires (1995) |
| Scincidae | <i>Amphiglossus punctatus</i>       | 0 | Camp 1923; Smith (1935); Jullien and Renous-Lécuru (1972,1973); Estes et al. (1988); Avila-Pires (1995) |
| Scincidae | <i>Amphiglossus reticulatus</i>     | 0 | Camp 1923; Smith (1935); Jullien and Renous-Lécuru (1972,1973); Estes et al. (1988); Avila-Pires (1995) |
| Scincidae | <i>Amphiglossus splendidus</i>      | 0 | Camp 1923; Smith (1935); Jullien and Renous-Lécuru (1972,1973); Estes et al. (1988); Avila-Pires (1995) |
| Scincidae | <i>Amphiglossus tanysona</i>        | 0 | Camp 1923; Smith (1935); Jullien and Renous-Lécuru (1972,1973); Estes et al. (1988); Avila-Pires (1995) |
| Scincidae | <i>Amphiglossus tsaratananensis</i> | 0 | Camp 1923; Smith (1935); Jullien and Renous-Lécuru (1972,1973); Estes et al. (1988); Avila-Pires (1995) |
| Scincidae | <i>Androngo trivittatus</i>         | 0 | Camp 1923; Smith (1935); Jullien and Renous-Lécuru (1972,1973); Estes et al. (1988); Avila-Pires (1995) |
| Scincidae | <i>Anomalopus leuckartii</i>        | 0 | Camp 1923; Smith (1935); Jullien and Renous-Lécuru (1972,1973); Estes et al. (1988); Avila-Pires (1995) |
| Scincidae | <i>Anomalopus mackayi</i>           | 0 | Camp 1923; Smith (1935); Jullien and Renous-Lécuru (1972,1973); Estes et al. (1988); Avila-Pires (1995) |
| Scincidae | <i>Anomalopus swanoni</i>           | 0 | Camp 1923; Smith (1935); Jullien and Renous-Lécuru (1972,1973); Estes et al. (1988); Avila-Pires (1995) |
| Scincidae | <i>Anomalopus verreauxi</i>         | 0 | Camp 1923; Smith (1935); Jullien and Renous-Lécuru (1972,1973); Estes et al. (1988); Avila-Pires (1995) |
| Scincidae | <i>Apterygodon vittatus</i>         | 0 | Camp 1923; Smith (1935); Jullien and Renous-Lécuru (1972,1973); Estes et al. (1988); Avila-Pires (1995) |
| Scincidae | <i>Asymblepharus alaicus</i>        | 0 | Camp 1923; Smith (1935); Jullien and Renous-Lécuru (1972,1973); Estes et al. (1988); Avila-Pires (1995) |
| Scincidae | <i>Asymblepharus sikimensis</i>     | 0 | Camp 1923; Smith (1935); Jullien and Renous-Lécuru (1972,1973); Estes et al. (1988); Avila-Pires (1995) |
| Scincidae | <i>Ateuchosaurus pellopleurus</i>   | 0 | Camp 1923; Smith (1935); Jullien and Renous-Lécuru (1972,1973); Estes et al. (1988); Avila-Pires (1995) |
| Scincidae | <i>Bartleia jigurru</i>             | 0 | Camp 1923; Smith (1935); Jullien and Renous-Lécuru (1972,1973); Estes et al. (1988); Avila-Pires (1995) |
| Scincidae | <i>Bassiana duperreyi</i>           | 0 | Camp 1923; Smith (1935); Jullien and Renous-Lécuru (1972,1973); Estes et al. (1988); Avila-Pires (1995) |
| Scincidae | <i>Bassiana trilineata</i>          | 0 | Camp 1923; Smith (1935); Jullien and Renous-Lécuru (1972,1973); Estes et al. (1988); Avila-Pires (1995) |
| Scincidae | <i>Bellatorias frerei</i>           | 0 | Camp 1923; Smith (1935); Jullien and Renous-Lécuru (1972,1973); Estes et al. (1988); Avila-Pires (1995) |
| Scincidae | <i>Bellatorias major</i>            | 0 | Camp 1923; Smith (1935); Jullien and Renous-Lécuru (1972,1973); Estes et al. (1988); Avila-Pires (1995) |
| Scincidae | <i>Brachymeles apus</i>             | 0 | Camp 1923; Smith (1935); Jullien and Renous-Lécuru (1972,1973); Estes et al. (1988); Avila-Pires (1995) |
| Scincidae | <i>Brachymeles bicolor</i>          | 0 | Camp 1923; Smith (1935); Jullien and Renous-Lécuru (1972,1973); Estes et al. (1988); Avila-Pires (1995) |
| Scincidae | <i>Brachymeles bonitae</i>          | 0 | Camp 1923; Smith (1935); Jullien and Renous-Lécuru (1972,1973); Estes et al. (1988); Avila-Pires (1995) |
| Scincidae | <i>Brachymeles boulengeri</i>       | 0 | Camp 1923; Smith (1935); Jullien and Renous-Lécuru (1972,1973); Estes et al. (1988); Avila-Pires (1995) |
| Scincidae | <i>Brachymeles cebuensis</i>        | 0 | Camp 1923; Smith (1935); Jullien and Renous-Lécuru (1972,1973); Estes et al. (1988); Avila-Pires (1995) |
| Scincidae | <i>Brachymeles elerae</i>           | 0 | Camp 1923; Smith (1935); Jullien and Renous-Lécuru (1972,1973); Estes et al. (1988); Avila-Pires (1995) |
| Scincidae | <i>Brachymeles gracilis</i>         | 0 | Camp 1923; Smith (1935); Jullien and Renous-Lécuru (1972,1973); Estes et al. (1988); Avila-Pires (1995) |
| Scincidae | <i>Brachymeles minimus</i>          | 0 | Camp 1923; Smith (1935); Jullien and Renous-Lécuru (1972,1973); Estes et al. (1988); Avila-Pires (1995) |
| Scincidae | <i>Brachymeles</i>                  | 0 | Camp 1923; Smith (1935); Jullien and Renous-Lécuru                                                      |

|           |                                          |   |                                                                                                         |
|-----------|------------------------------------------|---|---------------------------------------------------------------------------------------------------------|
|           | <i>pathfinderi</i>                       |   | (1972,1973); Estes et al. (1988); Avila-Pires (1995)                                                    |
| Scincidae | <i>Brachymeles samarensis</i>            | 0 | Camp 1923; Smith (1935); Jullien and Renous-Lécuru (1972,1973); Estes et al. (1988); Avila-Pires (1995) |
| Scincidae | <i>Brachymeles schadenbergi</i>          | 0 | Camp 1923; Smith (1935); Jullien and Renous-Lécuru (1972,1973); Estes et al. (1988); Avila-Pires (1995) |
| Scincidae | <i>Brachymeles talinis</i>               | 0 | Camp 1923; Smith (1935); Jullien and Renous-Lécuru (1972,1973); Estes et al. (1988); Avila-Pires (1995) |
| Scincidae | <i>Brachymeles tridactylus</i>           | 0 | Camp 1923; Smith (1935); Jullien and Renous-Lécuru (1972,1973); Estes et al. (1988); Avila-Pires (1995) |
| Scincidae | <i>Caledoniscincus aquilonius</i>        | 0 | Camp 1923; Smith (1935); Jullien and Renous-Lécuru (1972,1973); Estes et al. (1988); Avila-Pires (1995) |
| Scincidae | <i>Caledoniscincus atropunctatus</i>     | 0 | Camp 1923; Smith (1935); Jullien and Renous-Lécuru (1972,1973); Estes et al. (1988); Avila-Pires (1995) |
| Scincidae | <i>Caledoniscincus auratus</i>           | 0 | Camp 1923; Smith (1935); Jullien and Renous-Lécuru (1972,1973); Estes et al. (1988); Avila-Pires (1995) |
| Scincidae | <i>Caledoniscincus austrocaledonicus</i> | 0 | Camp 1923; Smith (1935); Jullien and Renous-Lécuru (1972,1973); Estes et al. (1988); Avila-Pires (1995) |
| Scincidae | <i>Caledoniscincus chazeaui</i>          | 0 | Camp 1923; Smith (1935); Jullien and Renous-Lécuru (1972,1973); Estes et al. (1988); Avila-Pires (1995) |
| Scincidae | <i>Caledoniscincus festivus</i>          | 0 | Camp 1923; Smith (1935); Jullien and Renous-Lécuru (1972,1973); Estes et al. (1988); Avila-Pires (1995) |
| Scincidae | <i>Caledoniscincus haplorhinus</i>       | 0 | Camp 1923; Smith (1935); Jullien and Renous-Lécuru (1972,1973); Estes et al. (1988); Avila-Pires (1995) |
| Scincidae | <i>Caledoniscincus orestes</i>           | 0 | Camp 1923; Smith (1935); Jullien and Renous-Lécuru (1972,1973); Estes et al. (1988); Avila-Pires (1995) |
| Scincidae | <i>Caledoniscincus renevieri</i>         | 0 | Camp 1923; Smith (1935); Jullien and Renous-Lécuru (1972,1973); Estes et al. (1988); Avila-Pires (1995) |
| Scincidae | <i>Caledoniscincus terma</i>             | 0 | Camp 1923; Smith (1935); Jullien and Renous-Lécuru (1972,1973); Estes et al. (1988); Avila-Pires (1995) |
| Scincidae | <i>Calyptotis lepidorostrum</i>          | 0 | Camp 1923; Smith (1935); Jullien and Renous-Lécuru (1972,1973); Estes et al. (1988); Avila-Pires (1995) |
| Scincidae | <i>Calyptotis ruficauda</i>              | 0 | Camp 1923; Smith (1935); Jullien and Renous-Lécuru (1972,1973); Estes et al. (1988); Avila-Pires (1995) |
| Scincidae | <i>Calyptotis scutirostrum</i>           | 0 | Camp 1923; Smith (1935); Jullien and Renous-Lécuru (1972,1973); Estes et al. (1988); Avila-Pires (1995) |
| Scincidae | <i>Carlia amax</i>                       | 0 | Camp 1923; Smith (1935); Jullien and Renous-Lécuru (1972,1973); Estes et al. (1988); Avila-Pires (1995) |
| Scincidae | <i>Carlia bicarinata</i>                 | 0 | Camp 1923; Smith (1935); Jullien and Renous-Lécuru (1972,1973); Estes et al. (1988); Avila-Pires (1995) |
| Scincidae | <i>Carlia coensis</i>                    | 0 | Camp 1923; Smith (1935); Jullien and Renous-Lécuru (1972,1973); Estes et al. (1988); Avila-Pires (1995) |
| Scincidae | <i>Carlia dogare</i>                     | 0 | Camp 1923; Smith (1935); Jullien and Renous-Lécuru (1972,1973); Estes et al. (1988); Avila-Pires (1995) |
| Scincidae | <i>Carlia fusca</i>                      | 0 | Camp 1923; Smith (1935); Jullien and Renous-Lécuru (1972,1973); Estes et al. (1988); Avila-Pires (1995) |
| Scincidae | <i>Carlia gracilis</i>                   | 0 | Camp 1923; Smith (1935); Jullien and Renous-Lécuru (1972,1973); Estes et al. (1988); Avila-Pires (1995) |
| Scincidae | <i>Carlia jarnoldae</i>                  | 0 | Camp 1923; Smith (1935); Jullien and Renous-Lécuru (1972,1973); Estes et al. (1988); Avila-Pires (1995) |
| Scincidae | <i>Carlia johnstonei</i>                 | 0 | Camp 1923; Smith (1935); Jullien and Renous-Lécuru (1972,1973); Estes et al. (1988); Avila-Pires (1995) |
| Scincidae | <i>Carlia longipes</i>                   | 0 | Camp 1923; Smith (1935); Jullien and Renous-Lécuru (1972,1973); Estes et al. (1988); Avila-Pires (1995) |
| Scincidae | <i>Carlia munda</i>                      | 0 | Camp 1923; Smith (1935); Jullien and Renous-Lécuru (1972,1973); Estes et al. (1988); Avila-Pires (1995) |
| Scincidae | <i>Carlia mundivensis</i>                | 0 | Camp 1923; Smith (1935); Jullien and Renous-Lécuru (1972,1973); Estes et al. (1988); Avila-Pires (1995) |
| Scincidae | <i>Carlia mysi</i>                       | 0 | Camp 1923; Smith (1935); Jullien and Renous-Lécuru (1972,1973); Estes et al. (1988); Avila-Pires (1995) |

|           |                                    |   |                                                                                                         |
|-----------|------------------------------------|---|---------------------------------------------------------------------------------------------------------|
| Scincidae | <i>Carlia pectoralis</i>           | 0 | Camp 1923; Smith (1935); Jullien and Renous-Lécure (1972,1973); Estes et al. (1988); Avila-Pires (1995) |
| Scincidae | <i>Carlia rhomboidalis</i>         | 0 | Camp 1923; Smith (1935); Jullien and Renous-Lécure (1972,1973); Estes et al. (1988); Avila-Pires (1995) |
| Scincidae | <i>Carlia rostralis</i>            | 0 | Camp 1923; Smith (1935); Jullien and Renous-Lécure (1972,1973); Estes et al. (1988); Avila-Pires (1995) |
| Scincidae | <i>Carlia rubrigularis</i>         | 0 | Camp 1923; Smith (1935); Jullien and Renous-Lécure (1972,1973); Estes et al. (1988); Avila-Pires (1995) |
| Scincidae | <i>Carlia rufilatus</i>            | 0 | Camp 1923; Smith (1935); Jullien and Renous-Lécure (1972,1973); Estes et al. (1988); Avila-Pires (1995) |
| Scincidae | <i>Carlia schmeltzii</i>           | 0 | Camp 1923; Smith (1935); Jullien and Renous-Lécure (1972,1973); Estes et al. (1988); Avila-Pires (1995) |
| Scincidae | <i>Carlia scirtetis</i>            | 0 | Camp 1923; Smith (1935); Jullien and Renous-Lécure (1972,1973); Estes et al. (1988); Avila-Pires (1995) |
| Scincidae | <i>Carlia storri</i>               | 0 | Camp 1923; Smith (1935); Jullien and Renous-Lécure (1972,1973); Estes et al. (1988); Avila-Pires (1995) |
| Scincidae | <i>Carlia tetradactyla</i>         | 0 | Camp 1923; Smith (1935); Jullien and Renous-Lécure (1972,1973); Estes et al. (1988); Avila-Pires (1995) |
| Scincidae | <i>Carlia triacantha</i>           | 0 | Camp 1923; Smith (1935); Jullien and Renous-Lécure (1972,1973); Estes et al. (1988); Avila-Pires (1995) |
| Scincidae | <i>Carlia vivax</i>                | 0 | Camp 1923; Smith (1935); Jullien and Renous-Lécure (1972,1973); Estes et al. (1988); Avila-Pires (1995) |
| Scincidae | <i>Cautula zia</i>                 | 0 | Camp 1923; Smith (1935); Jullien and Renous-Lécure (1972,1973); Estes et al. (1988); Avila-Pires (1995) |
| Scincidae | <i>Celatiscincus euryotis</i>      | 0 | Camp 1923; Smith (1935); Jullien and Renous-Lécure (1972,1973); Estes et al. (1988); Avila-Pires (1995) |
| Scincidae | <i>Celatiscincus similis</i>       | 0 | Camp 1923; Smith (1935); Jullien and Renous-Lécure (1972,1973); Estes et al. (1988); Avila-Pires (1995) |
| Scincidae | <i>Chalcides bedriagai</i>         | 0 | Camp 1923; Smith (1935); Jullien and Renous-Lécure (1972,1973); Estes et al. (1988); Avila-Pires (1995) |
| Scincidae | <i>Chalcides boulengeri</i>        | 0 | Camp 1923; Smith (1935); Jullien and Renous-Lécure (1972,1973); Estes et al. (1988); Avila-Pires (1995) |
| Scincidae | <i>Chalcides chalcides</i>         | 0 | Camp 1923; Smith (1935); Jullien and Renous-Lécure (1972,1973); Estes et al. (1988); Avila-Pires (1995) |
| Scincidae | <i>Chalcides coeruleopunctatus</i> | 0 | Camp 1923; Smith (1935); Jullien and Renous-Lécure (1972,1973); Estes et al. (1988); Avila-Pires (1995) |
| Scincidae | <i>Chalcides colosii</i>           | 0 | Camp 1923; Smith (1935); Jullien and Renous-Lécure (1972,1973); Estes et al. (1988); Avila-Pires (1995) |
| Scincidae | <i>Chalcides guentheri</i>         | 0 | Camp 1923; Smith (1935); Jullien and Renous-Lécure (1972,1973); Estes et al. (1988); Avila-Pires (1995) |
| Scincidae | <i>Chalcides lanzai</i>            | 0 | Camp 1923; Smith (1935); Jullien and Renous-Lécure (1972,1973); Estes et al. (1988); Avila-Pires (1995) |
| Scincidae | <i>Chalcides manueli</i>           | 0 | Camp 1923; Smith (1935); Jullien and Renous-Lécure (1972,1973); Estes et al. (1988); Avila-Pires (1995) |
| Scincidae | <i>Chalcides mauritanicus</i>      | 0 | Camp 1923; Smith (1935); Jullien and Renous-Lécure (1972,1973); Estes et al. (1988); Avila-Pires (1995) |
| Scincidae | <i>Chalcides minutus</i>           | 0 | Camp 1923; Smith (1935); Jullien and Renous-Lécure (1972,1973); Estes et al. (1988); Avila-Pires (1995) |
| Scincidae | <i>Chalcides mionecton</i>         | 0 | Camp 1923; Smith (1935); Jullien and Renous-Lécure (1972,1973); Estes et al. (1988); Avila-Pires (1995) |
| Scincidae | <i>Chalcides montanus</i>          | 0 | Camp 1923; Smith (1935); Jullien and Renous-Lécure (1972,1973); Estes et al. (1988); Avila-Pires (1995) |
| Scincidae | <i>Chalcides ocellatus</i>         | 0 | Camp 1923; Smith (1935); Jullien and Renous-Lécure (1972,1973); Estes et al. (1988); Avila-Pires (1995) |
| Scincidae | <i>Chalcides parallelus</i>        | 0 | Camp 1923; Smith (1935); Jullien and Renous-Lécure (1972,1973); Estes et al. (1988); Avila-Pires (1995) |
| Scincidae | <i>Chalcides polylepis</i>         | 0 | Camp 1923; Smith (1935); Jullien and Renous-Lécure (1972,1973); Estes et al. (1988); Avila-Pires (1995) |
| Scincidae | <i>Chalcides</i>                   | 0 | Camp 1923; Smith (1935); Jullien and Renous-Lécure                                                      |

|           |                                        |   |                                                                                                         |
|-----------|----------------------------------------|---|---------------------------------------------------------------------------------------------------------|
|           | <i>pseudostriatus</i>                  |   | (1972,1973); Estes et al. (1988); Avila-Pires (1995)                                                    |
| Scincidae | <i>Chalcides sepsoides</i>             | 0 | Camp 1923; Smith (1935); Jullien and Renous-Lécuru (1972,1973); Estes et al. (1988); Avila-Pires (1995) |
| Scincidae | <i>Chalcides sexlineatus</i>           | 0 | Camp 1923; Smith (1935); Jullien and Renous-Lécuru (1972,1973); Estes et al. (1988); Avila-Pires (1995) |
| Scincidae | <i>Chalcides sphepsiformis</i>         | 0 | Camp 1923; Smith (1935); Jullien and Renous-Lécuru (1972,1973); Estes et al. (1988); Avila-Pires (1995) |
| Scincidae | <i>Chalcides striatus</i>              | 0 | Camp 1923; Smith (1935); Jullien and Renous-Lécuru (1972,1973); Estes et al. (1988); Avila-Pires (1995) |
| Scincidae | <i>Chalcides viridanus</i>             | 0 | Camp 1923; Smith (1935); Jullien and Renous-Lécuru (1972,1973); Estes et al. (1988); Avila-Pires (1995) |
| Scincidae | <i>Chioninia delalandii</i>            | 0 | Camp 1923; Smith (1935); Jullien and Renous-Lécuru (1972,1973); Estes et al. (1988); Avila-Pires (1995) |
| Scincidae | <i>Chioninia fogoensis</i>             | 0 | Camp 1923; Smith (1935); Jullien and Renous-Lécuru (1972,1973); Estes et al. (1988); Avila-Pires (1995) |
| Scincidae | <i>Chioninia spinalis</i>              | 0 | Camp 1923; Smith (1935); Jullien and Renous-Lécuru (1972,1973); Estes et al. (1988); Avila-Pires (1995) |
| Scincidae | <i>Chioninia stangeri</i>              | 0 | Camp 1923; Smith (1935); Jullien and Renous-Lécuru (1972,1973); Estes et al. (1988); Avila-Pires (1995) |
| Scincidae | <i>Chioninia vaillantii</i>            | 0 | Camp 1923; Smith (1935); Jullien and Renous-Lécuru (1972,1973); Estes et al. (1988); Avila-Pires (1995) |
| Scincidae | <i>Coeranoscincus frontalis</i>        | 0 | Camp 1923; Smith (1935); Jullien and Renous-Lécuru (1972,1973); Estes et al. (1988); Avila-Pires (1995) |
| Scincidae | <i>Coeranoscincus reticulatus</i>      | 0 | Camp 1923; Smith (1935); Jullien and Renous-Lécuru (1972,1973); Estes et al. (1988); Avila-Pires (1995) |
| Scincidae | <i>Coggeria naufragus</i>              | 0 | Camp 1923; Smith (1935); Jullien and Renous-Lécuru (1972,1973); Estes et al. (1988); Avila-Pires (1995) |
| Scincidae | <i>Corucia zebrata</i>                 | 0 | Camp 1923; Smith (1935); Jullien and Renous-Lécuru (1972,1973); Estes et al. (1988); Avila-Pires (1995) |
| Scincidae | <i>Cryptoblepharus boutonii</i>        | 0 | Camp 1923; Smith (1935); Jullien and Renous-Lécuru (1972,1973); Estes et al. (1988); Avila-Pires (1995) |
| Scincidae | <i>Cryptoblepharus nigropunctatus</i>  | 0 | Camp 1923; Smith (1935); Jullien and Renous-Lécuru (1972,1973); Estes et al. (1988); Avila-Pires (1995) |
| Scincidae | <i>Cryptoblepharus novocaledonicus</i> | 0 | Camp 1923; Smith (1935); Jullien and Renous-Lécuru (1972,1973); Estes et al. (1988); Avila-Pires (1995) |
| Scincidae | <i>Ctenotus angusticeps</i>            | 0 | Camp 1923; Smith (1935); Jullien and Renous-Lécuru (1972,1973); Estes et al. (1988); Avila-Pires (1995) |
| Scincidae | <i>Ctenotus astarte</i>                | 0 | Camp 1923; Smith (1935); Jullien and Renous-Lécuru (1972,1973); Estes et al. (1988); Avila-Pires (1995) |
| Scincidae | <i>Ctenotus atlas</i>                  | 0 | Camp 1923; Smith (1935); Jullien and Renous-Lécuru (1972,1973); Estes et al. (1988); Avila-Pires (1995) |
| Scincidae | <i>Ctenotus australis</i>              | 0 | Camp 1923; Smith (1935); Jullien and Renous-Lécuru (1972,1973); Estes et al. (1988); Avila-Pires (1995) |
| Scincidae | <i>Ctenotus brooksi</i>                | 0 | Camp 1923; Smith (1935); Jullien and Renous-Lécuru (1972,1973); Estes et al. (1988); Avila-Pires (1995) |
| Scincidae | <i>Ctenotus calurus</i>                | 0 | Camp 1923; Smith (1935); Jullien and Renous-Lécuru (1972,1973); Estes et al. (1988); Avila-Pires (1995) |
| Scincidae | <i>Ctenotus essingtonii</i>            | 0 | Camp 1923; Smith (1935); Jullien and Renous-Lécuru (1972,1973); Estes et al. (1988); Avila-Pires (1995) |
| Scincidae | <i>Ctenotus fallens</i>                | 0 | Camp 1923; Smith (1935); Jullien and Renous-Lécuru (1972,1973); Estes et al. (1988); Avila-Pires (1995) |
| Scincidae | <i>Ctenotus gagudju</i>                | 0 | Camp 1923; Smith (1935); Jullien and Renous-Lécuru (1972,1973); Estes et al. (1988); Avila-Pires (1995) |
| Scincidae | <i>Ctenotus grandis</i>                | 0 | Camp 1923; Smith (1935); Jullien and Renous-Lécuru (1972,1973); Estes et al. (1988); Avila-Pires (1995) |
| Scincidae | <i>Ctenotus greeri</i>                 | 0 | Camp 1923; Smith (1935); Jullien and Renous-Lécuru (1972,1973); Estes et al. (1988); Avila-Pires (1995) |
| Scincidae | <i>Ctenotus hanloni</i>                | 0 | Camp 1923; Smith (1935); Jullien and Renous-Lécuru (1972,1973); Estes et al. (1988); Avila-Pires (1995) |

|           |                                       |   |                                                                                                         |
|-----------|---------------------------------------|---|---------------------------------------------------------------------------------------------------------|
| Scincidae | <i>Ctenotus hebetior</i>              | 0 | Camp 1923; Smith (1935); Jullien and Renous-Lécure (1972,1973); Estes et al. (1988); Avila-Pires (1995) |
| Scincidae | <i>Ctenotus hilli</i>                 | 0 | Camp 1923; Smith (1935); Jullien and Renous-Lécure (1972,1973); Estes et al. (1988); Avila-Pires (1995) |
| Scincidae | <i>Ctenotus inornatus</i>             | 0 | Camp 1923; Smith (1935); Jullien and Renous-Lécure (1972,1973); Estes et al. (1988); Avila-Pires (1995) |
| Scincidae | <i>Ctenotus labillardieri</i>         | 0 | Camp 1923; Smith (1935); Jullien and Renous-Lécure (1972,1973); Estes et al. (1988); Avila-Pires (1995) |
| Scincidae | <i>Ctenotus leae</i>                  | 0 | Camp 1923; Smith (1935); Jullien and Renous-Lécure (1972,1973); Estes et al. (1988); Avila-Pires (1995) |
| Scincidae | <i>Ctenotus leonhardii</i>            | 0 | Camp 1923; Smith (1935); Jullien and Renous-Lécure (1972,1973); Estes et al. (1988); Avila-Pires (1995) |
| Scincidae | <i>Ctenotus maryani</i>               | 0 | Camp 1923; Smith (1935); Jullien and Renous-Lécure (1972,1973); Estes et al. (1988); Avila-Pires (1995) |
| Scincidae | <i>Ctenotus mimetes</i>               | 0 | Camp 1923; Smith (1935); Jullien and Renous-Lécure (1972,1973); Estes et al. (1988); Avila-Pires (1995) |
| Scincidae | <i>Ctenotus nasutus</i>               | 0 | Camp 1923; Smith (1935); Jullien and Renous-Lécure (1972,1973); Estes et al. (1988); Avila-Pires (1995) |
| Scincidae | <i>Ctenotus olympicus</i>             | 0 | Camp 1923; Smith (1935); Jullien and Renous-Lécure (1972,1973); Estes et al. (1988); Avila-Pires (1995) |
| Scincidae | <i>Ctenotus pantherinus</i>           | 0 | Camp 1923; Smith (1935); Jullien and Renous-Lécure (1972,1973); Estes et al. (1988); Avila-Pires (1995) |
| Scincidae | <i>Ctenotus piankai</i>               | 0 | Camp 1923; Smith (1935); Jullien and Renous-Lécure (1972,1973); Estes et al. (1988); Avila-Pires (1995) |
| Scincidae | <i>Ctenotus pulchellus</i>            | 0 | Camp 1923; Smith (1935); Jullien and Renous-Lécure (1972,1973); Estes et al. (1988); Avila-Pires (1995) |
| Scincidae | <i>Ctenotus quattuordecimlineatus</i> | 0 | Camp 1923; Smith (1935); Jullien and Renous-Lécure (1972,1973); Estes et al. (1988); Avila-Pires (1995) |
| Scincidae | <i>Ctenotus rawlinsoni</i>            | 0 | Camp 1923; Smith (1935); Jullien and Renous-Lécure (1972,1973); Estes et al. (1988); Avila-Pires (1995) |
| Scincidae | <i>Ctenotus regius</i>                | 0 | Camp 1923; Smith (1935); Jullien and Renous-Lécure (1972,1973); Estes et al. (1988); Avila-Pires (1995) |
| Scincidae | <i>Ctenotus robustus</i>              | 0 | Camp 1923; Smith (1935); Jullien and Renous-Lécure (1972,1973); Estes et al. (1988); Avila-Pires (1995) |
| Scincidae | <i>Ctenotus rubicundus</i>            | 0 | Camp 1923; Smith (1935); Jullien and Renous-Lécure (1972,1973); Estes et al. (1988); Avila-Pires (1995) |
| Scincidae | <i>Ctenotus rutilans</i>              | 0 | Camp 1923; Smith (1935); Jullien and Renous-Lécure (1972,1973); Estes et al. (1988); Avila-Pires (1995) |
| Scincidae | <i>Ctenotus saxatilis</i>             | 0 | Camp 1923; Smith (1935); Jullien and Renous-Lécure (1972,1973); Estes et al. (1988); Avila-Pires (1995) |
| Scincidae | <i>Ctenotus schomburgkii</i>          | 0 | Camp 1923; Smith (1935); Jullien and Renous-Lécure (1972,1973); Estes et al. (1988); Avila-Pires (1995) |
| Scincidae | <i>Ctenotus septenarius</i>           | 0 | Camp 1923; Smith (1935); Jullien and Renous-Lécure (1972,1973); Estes et al. (1988); Avila-Pires (1995) |
| Scincidae | <i>Ctenotus serventyi</i>             | 0 | Camp 1923; Smith (1935); Jullien and Renous-Lécure (1972,1973); Estes et al. (1988); Avila-Pires (1995) |
| Scincidae | <i>Ctenotus spaldingi</i>             | 0 | Camp 1923; Smith (1935); Jullien and Renous-Lécure (1972,1973); Estes et al. (1988); Avila-Pires (1995) |
| Scincidae | <i>Ctenotus strauchii</i>             | 0 | Camp 1923; Smith (1935); Jullien and Renous-Lécure (1972,1973); Estes et al. (1988); Avila-Pires (1995) |
| Scincidae | <i>Ctenotus taeniolatus</i>           | 0 | Camp 1923; Smith (1935); Jullien and Renous-Lécure (1972,1973); Estes et al. (1988); Avila-Pires (1995) |
| Scincidae | <i>Ctenotus tanamiensis</i>           | 0 | Camp 1923; Smith (1935); Jullien and Renous-Lécure (1972,1973); Estes et al. (1988); Avila-Pires (1995) |
| Scincidae | <i>Ctenotus uber</i>                  | 0 | Camp 1923; Smith (1935); Jullien and Renous-Lécure (1972,1973); Estes et al. (1988); Avila-Pires (1995) |
| Scincidae | <i>Ctenotus youngsoni</i>             | 0 | Camp 1923; Smith (1935); Jullien and Renous-Lécure (1972,1973); Estes et al. (1988); Avila-Pires (1995) |



|           |                                   |   |                                                                                                         |
|-----------|-----------------------------------|---|---------------------------------------------------------------------------------------------------------|
| Scincidae | <i>Cyclodina aenea</i>            | 0 | Camp 1923; Smith (1935); Jullien and Renous-Lécure (1972,1973); Estes et al. (1988); Avila-Pires (1995) |
| Scincidae | <i>Cyclodina alani</i>            | 0 | Camp 1923; Smith (1935); Jullien and Renous-Lécure (1972,1973); Estes et al. (1988); Avila-Pires (1995) |
| Scincidae | <i>Cyclodina hardyi</i>           | 0 | Camp 1923; Smith (1935); Jullien and Renous-Lécure (1972,1973); Estes et al. (1988); Avila-Pires (1995) |
| Scincidae | <i>Cyclodina levidensa</i>        | 0 | Camp 1923; Smith (1935); Jullien and Renous-Lécure (1972,1973); Estes et al. (1988); Avila-Pires (1995) |
| Scincidae | <i>Cyclodina lichenigera</i>      | 0 | Camp 1923; Smith (1935); Jullien and Renous-Lécure (1972,1973); Estes et al. (1988); Avila-Pires (1995) |
| Scincidae | <i>Cyclodina macgregori</i>       | 0 | Camp 1923; Smith (1935); Jullien and Renous-Lécure (1972,1973); Estes et al. (1988); Avila-Pires (1995) |
| Scincidae | <i>Cyclodina oliveri</i>          | 0 | Camp 1923; Smith (1935); Jullien and Renous-Lécure (1972,1973); Estes et al. (1988); Avila-Pires (1995) |
| Scincidae | <i>Cyclodina ornata</i>           | 0 | Camp 1923; Smith (1935); Jullien and Renous-Lécure (1972,1973); Estes et al. (1988); Avila-Pires (1995) |
| Scincidae | <i>Cyclodina townsi</i>           | 0 | Camp 1923; Smith (1935); Jullien and Renous-Lécure (1972,1973); Estes et al. (1988); Avila-Pires (1995) |
| Scincidae | <i>Cyclodina whitakeri</i>        | 0 | Camp 1923; Smith (1935); Jullien and Renous-Lécure (1972,1973); Estes et al. (1988); Avila-Pires (1995) |
| Scincidae | <i>Cyclodomorphus branchialis</i> | 0 | Camp 1923; Smith (1935); Jullien and Renous-Lécure (1972,1973); Estes et al. (1988); Avila-Pires (1995) |
| Scincidae | <i>Cyclodomorphus casuarinae</i>  | 0 | Camp 1923; Smith (1935); Jullien and Renous-Lécure (1972,1973); Estes et al. (1988); Avila-Pires (1995) |
| Scincidae | <i>Cyclodomorphus michaeli</i>    | 0 | Camp 1923; Smith (1935); Jullien and Renous-Lécure (1972,1973); Estes et al. (1988); Avila-Pires (1995) |
| Scincidae | <i>Dasia grisea</i>               | 0 | Camp 1923; Smith (1935); Jullien and Renous-Lécure (1972,1973); Estes et al. (1988); Avila-Pires (1995) |
| Scincidae | <i>Dasia olivacea</i>             | 0 | Camp 1923; Smith (1935); Jullien and Renous-Lécure (1972,1973); Estes et al. (1988); Avila-Pires (1995) |
| Scincidae | <i>Davewakeum miriamae</i>        | 0 | Camp 1923; Smith (1935); Jullien and Renous-Lécure (1972,1973); Estes et al. (1988); Avila-Pires (1995) |
| Scincidae | <i>Egernia depressa</i>           | 0 | Camp 1923; Smith (1935); Jullien and Renous-Lécure (1972,1973); Estes et al. (1988); Avila-Pires (1995) |
| Scincidae | <i>Egernia guthega</i>            | 0 | Camp 1923; Smith (1935); Jullien and Renous-Lécure (1972,1973); Estes et al. (1988); Avila-Pires (1995) |
| Scincidae | <i>Egernia hosmeri</i>            | 0 | Camp 1923; Smith (1935); Jullien and Renous-Lécure (1972,1973); Estes et al. (1988); Avila-Pires (1995) |
| Scincidae | <i>Egernia inornata</i>           | 0 | Camp 1923; Smith (1935); Jullien and Renous-Lécure (1972,1973); Estes et al. (1988); Avila-Pires (1995) |
| Scincidae | <i>Egernia kingii</i>             | 0 | Camp 1923; Smith (1935); Jullien and Renous-Lécure (1972,1973); Estes et al. (1988); Avila-Pires (1995) |
| Scincidae | <i>Egernia kintorei</i>           | 0 | Camp 1923; Smith (1935); Jullien and Renous-Lécure (1972,1973); Estes et al. (1988); Avila-Pires (1995) |
| Scincidae | <i>Egernia luctuosa</i>           | 0 | Camp 1923; Smith (1935); Jullien and Renous-Lécure (1972,1973); Estes et al. (1988); Avila-Pires (1995) |
| Scincidae | <i>Egernia margaretae</i>         | 0 | Camp 1923; Smith (1935); Jullien and Renous-Lécure (1972,1973); Estes et al. (1988); Avila-Pires (1995) |
| Scincidae | <i>Egernia modesta</i>            | 0 | Camp 1923; Smith (1935); Jullien and Renous-Lécure (1972,1973); Estes et al. (1988); Avila-Pires (1995) |
| Scincidae | <i>Egernia montana</i>            | 0 | Camp 1923; Smith (1935); Jullien and Renous-Lécure (1972,1973); Estes et al. (1988); Avila-Pires (1995) |
| Scincidae | <i>Egernia multiscutata</i>       | 0 | Camp 1923; Smith (1935); Jullien and Renous-Lécure (1972,1973); Estes et al. (1988); Avila-Pires (1995) |
| Scincidae | <i>Egernia napoleonis</i>         | 0 | Camp 1923; Smith (1935); Jullien and Renous-Lécure (1972,1973); Estes et al. (1988); Avila-Pires (1995) |
| Scincidae | <i>Egernia pulchra</i>            | 0 | Camp 1923; Smith (1935); Jullien and Renous-Lécure (1972,1973); Estes et al. (1988); Avila-Pires (1995) |
| Scincidae | <i>Egernia richardi</i>           | 0 | Camp 1923; Smith (1935); Jullien and Renous-Lécure                                                      |

|           |                                   |   |                                                                                                         |
|-----------|-----------------------------------|---|---------------------------------------------------------------------------------------------------------|
|           |                                   |   | (1972,1973); Estes et al. (1988); Avila-Pires (1995)                                                    |
| Scincidae | <i>Egernia saxatilis</i>          | 0 | Camp 1923; Smith (1935); Jullien and Renous-Lécuru (1972,1973); Estes et al. (1988); Avila-Pires (1995) |
| Scincidae | <i>Egernia stokesii</i>           | 0 | Camp 1923; Smith (1935); Jullien and Renous-Lécuru (1972,1973); Estes et al. (1988); Avila-Pires (1995) |
| Scincidae | <i>Egernia striata</i>            | 0 | Camp 1923; Smith (1935); Jullien and Renous-Lécuru (1972,1973); Estes et al. (1988); Avila-Pires (1995) |
| Scincidae | <i>Egernia whitii</i>             | 0 | Camp 1923; Smith (1935); Jullien and Renous-Lécuru (1972,1973); Estes et al. (1988); Avila-Pires (1995) |
| Scincidae | <i>Emoia atrocostata</i>          | 0 | Camp 1923; Smith (1935); Jullien and Renous-Lécuru (1972,1973); Estes et al. (1988); Avila-Pires (1995) |
| Scincidae | <i>Emoia caeruleocauda</i>        | 0 | Camp 1923; Smith (1935); Jullien and Renous-Lécuru (1972,1973); Estes et al. (1988); Avila-Pires (1995) |
| Scincidae | <i>Emoia concolor</i>             | 0 | Camp 1923; Smith (1935); Jullien and Renous-Lécuru (1972,1973); Estes et al. (1988); Avila-Pires (1995) |
| Scincidae | <i>Emoia cyanogaster</i>          | 0 | Camp 1923; Smith (1935); Jullien and Renous-Lécuru (1972,1973); Estes et al. (1988); Avila-Pires (1995) |
| Scincidae | <i>Emoia cyanura</i>              | 0 | Camp 1923; Smith (1935); Jullien and Renous-Lécuru (1972,1973); Estes et al. (1988); Avila-Pires (1995) |
| Scincidae | <i>Emoia impar</i>                | 0 | Camp 1923; Smith (1935); Jullien and Renous-Lécuru (1972,1973); Estes et al. (1988); Avila-Pires (1995) |
| Scincidae | <i>Emoia isolata</i>              | 0 | Camp 1923; Smith (1935); Jullien and Renous-Lécuru (1972,1973); Estes et al. (1988); Avila-Pires (1995) |
| Scincidae | <i>Emoia jakati</i>               | 0 | Camp 1923; Smith (1935); Jullien and Renous-Lécuru (1972,1973); Estes et al. (1988); Avila-Pires (1995) |
| Scincidae | <i>Emoia loyaltiensis</i>         | 0 | Camp 1923; Smith (1935); Jullien and Renous-Lécuru (1972,1973); Estes et al. (1988); Avila-Pires (1995) |
| Scincidae | <i>Emoia physicae</i>             | 0 | Camp 1923; Smith (1935); Jullien and Renous-Lécuru (1972,1973); Estes et al. (1988); Avila-Pires (1995) |
| Scincidae | <i>Emoia pseudocyanura</i>        | 0 | Camp 1923; Smith (1935); Jullien and Renous-Lécuru (1972,1973); Estes et al. (1988); Avila-Pires (1995) |
| Scincidae | <i>Emoia schmidtii</i>            | 0 | Camp 1923; Smith (1935); Jullien and Renous-Lécuru (1972,1973); Estes et al. (1988); Avila-Pires (1995) |
| Scincidae | <i>Emoia tongana</i>              | 0 | Camp 1923; Smith (1935); Jullien and Renous-Lécuru (1972,1973); Estes et al. (1988); Avila-Pires (1995) |
| Scincidae | <i>Eremiascincus fasciolatus</i>  | 0 | Camp 1923; Smith (1935); Jullien and Renous-Lécuru (1972,1973); Estes et al. (1988); Avila-Pires (1995) |
| Scincidae | <i>Eremiascincus richardsonii</i> | 0 | Camp 1923; Smith (1935); Jullien and Renous-Lécuru (1972,1973); Estes et al. (1988); Avila-Pires (1995) |
| Scincidae | <i>Eugongylus albofasciolatus</i> | 0 | Camp 1923; Smith (1935); Jullien and Renous-Lécuru (1972,1973); Estes et al. (1988); Avila-Pires (1995) |
| Scincidae | <i>Eugongylus rufescens</i>       | 0 | Camp 1923; Smith (1935); Jullien and Renous-Lécuru (1972,1973); Estes et al. (1988); Avila-Pires (1995) |
| Scincidae | <i>Eulamprus amplus</i>           | 0 | Camp 1923; Smith (1935); Jullien and Renous-Lécuru (1972,1973); Estes et al. (1988); Avila-Pires (1995) |
| Scincidae | <i>Eulamprus brachyosoma</i>      | 0 | Camp 1923; Smith (1935); Jullien and Renous-Lécuru (1972,1973); Estes et al. (1988); Avila-Pires (1995) |
| Scincidae | <i>Eulamprus frerei</i>           | 0 | Camp 1923; Smith (1935); Jullien and Renous-Lécuru (1972,1973); Estes et al. (1988); Avila-Pires (1995) |
| Scincidae | <i>Eulamprus heatwolei</i>        | 0 | Camp 1923; Smith (1935); Jullien and Renous-Lécuru (1972,1973); Estes et al. (1988); Avila-Pires (1995) |
| Scincidae | <i>Eulamprus kosciuskoi</i>       | 0 | Camp 1923; Smith (1935); Jullien and Renous-Lécuru (1972,1973); Estes et al. (1988); Avila-Pires (1995) |
| Scincidae | <i>Eulamprus leuraensis</i>       | 0 | Camp 1923; Smith (1935); Jullien and Renous-Lécuru (1972,1973); Estes et al. (1988); Avila-Pires (1995) |
| Scincidae | <i>Eulamprus luteilateralis</i>   | 0 | Camp 1923; Smith (1935); Jullien and Renous-Lécuru (1972,1973); Estes et al. (1988); Avila-Pires (1995) |
| Scincidae | <i>Eulamprus martini</i>          | 0 | Camp 1923; Smith (1935); Jullien and Renous-Lécuru (1972,1973); Estes et al. (1988); Avila-Pires (1995) |

|           |                                     |   |                                                                                                         |
|-----------|-------------------------------------|---|---------------------------------------------------------------------------------------------------------|
| Scincidae | <i>Eulamprus murrayi</i>            | 0 | Camp 1923; Smith (1935); Jullien and Renous-Lécuru (1972,1973); Estes et al. (1988); Avila-Pires (1995) |
| Scincidae | <i>Eulamprus quoyii</i>             | 0 | Camp 1923; Smith (1935); Jullien and Renous-Lécuru (1972,1973); Estes et al. (1988); Avila-Pires (1995) |
| Scincidae | <i>Eulamprus sokosoma</i>           | 0 | Camp 1923; Smith (1935); Jullien and Renous-Lécuru (1972,1973); Estes et al. (1988); Avila-Pires (1995) |
| Scincidae | <i>Eulamprus tenuis</i>             | 0 | Camp 1923; Smith (1935); Jullien and Renous-Lécuru (1972,1973); Estes et al. (1988); Avila-Pires (1995) |
| Scincidae | <i>Eulamprus tigrinus</i>           | 0 | Camp 1923; Smith (1935); Jullien and Renous-Lécuru (1972,1973); Estes et al. (1988); Avila-Pires (1995) |
| Scincidae | <i>Eulamprus tryoni</i>             | 0 | Camp 1923; Smith (1935); Jullien and Renous-Lécuru (1972,1973); Estes et al. (1988); Avila-Pires (1995) |
| Scincidae | <i>Eulamprus tympanum</i>           | 0 | Camp 1923; Smith (1935); Jullien and Renous-Lécuru (1972,1973); Estes et al. (1988); Avila-Pires (1995) |
| Scincidae | <i>Eumeces algeriensis</i>          | 0 | Camp 1923; Smith (1935); Jullien and Renous-Lécuru (1972,1973); Estes et al. (1988); Avila-Pires (1995) |
| Scincidae | <i>Eumeces schneideri</i>           | 0 | Camp 1923; Smith (1935); Jullien and Renous-Lécuru (1972,1973); Estes et al. (1988); Avila-Pires (1995) |
| Scincidae | <i>Eumecia anchietae</i>            | 0 | Camp 1923; Smith (1935); Jullien and Renous-Lécuru (1972,1973); Estes et al. (1988); Avila-Pires (1995) |
| Scincidae | <i>Eurylepis taeniolatus</i>        | 0 | Camp 1923; Smith (1935); Jullien and Renous-Lécuru (1972,1973); Estes et al. (1988); Avila-Pires (1995) |
| Scincidae | <i>Eutropis beddomii</i>            | 0 | Camp 1923; Smith (1935); Jullien and Renous-Lécuru (1972,1973); Estes et al. (1988); Avila-Pires (1995) |
| Scincidae | <i>Eutropis bibronii</i>            | 0 | Camp 1923; Smith (1935); Jullien and Renous-Lécuru (1972,1973); Estes et al. (1988); Avila-Pires (1995) |
| Scincidae | <i>Eutropis clivicola</i>           | 0 | Camp 1923; Smith (1935); Jullien and Renous-Lécuru (1972,1973); Estes et al. (1988); Avila-Pires (1995) |
| Scincidae | <i>Eutropis cumingi</i>             | 0 | Camp 1923; Smith (1935); Jullien and Renous-Lécuru (1972,1973); Estes et al. (1988); Avila-Pires (1995) |
| Scincidae | <i>Eutropis longicaudata</i>        | 0 | Camp 1923; Smith (1935); Jullien and Renous-Lécuru (1972,1973); Estes et al. (1988); Avila-Pires (1995) |
| Scincidae | <i>Eutropis macularia</i>           | 0 | Camp 1923; Smith (1935); Jullien and Renous-Lécuru (1972,1973); Estes et al. (1988); Avila-Pires (1995) |
| Scincidae | <i>Eutropis multicarinata</i>       | 0 | Camp 1923; Smith (1935); Jullien and Renous-Lécuru (1972,1973); Estes et al. (1988); Avila-Pires (1995) |
| Scincidae | <i>Eutropis multifasciata</i>       | 0 | Camp 1923; Smith (1935); Jullien and Renous-Lécuru (1972,1973); Estes et al. (1988); Avila-Pires (1995) |
| Scincidae | <i>Eutropis nagarjuni</i>           | 0 | Camp 1923; Smith (1935); Jullien and Renous-Lécuru (1972,1973); Estes et al. (1988); Avila-Pires (1995) |
| Scincidae | <i>Eutropis rudis</i>               | 0 | Camp 1923; Smith (1935); Jullien and Renous-Lécuru (1972,1973); Estes et al. (1988); Avila-Pires (1995) |
| Scincidae | <i>Eutropis trivittata</i>          | 0 | Camp 1923; Smith (1935); Jullien and Renous-Lécuru (1972,1973); Estes et al. (1988); Avila-Pires (1995) |
| Scincidae | <i>Feylinia currori</i>             | 0 | Camp 1923; Smith (1935); Jullien and Renous-Lécuru (1972,1973); Estes et al. (1988); Avila-Pires (1995) |
| Scincidae | <i>Feylinia grandisquamis</i>       | 0 | Camp 1923; Smith (1935); Jullien and Renous-Lécuru (1972,1973); Estes et al. (1988); Avila-Pires (1995) |
| Scincidae | <i>Feylinia polylepis</i>           | 0 | Camp 1923; Smith (1935); Jullien and Renous-Lécuru (1972,1973); Estes et al. (1988); Avila-Pires (1995) |
| Scincidae | <i>Glaphyromorphus cracens</i>      | 0 | Camp 1923; Smith (1935); Jullien and Renous-Lécuru (1972,1973); Estes et al. (1988); Avila-Pires (1995) |
| Scincidae | <i>Glaphyromorphus darwiniensis</i> | 0 | Camp 1923; Smith (1935); Jullien and Renous-Lécuru (1972,1973); Estes et al. (1988); Avila-Pires (1995) |
| Scincidae | <i>Glaphyromorphus douglasi</i>     | 0 | Camp 1923; Smith (1935); Jullien and Renous-Lécuru (1972,1973); Estes et al. (1988); Avila-Pires (1995) |
| Scincidae | <i>Glaphyromorphus fuscicaudis</i>  | 0 | Camp 1923; Smith (1935); Jullien and Renous-Lécuru (1972,1973); Estes et al. (1988); Avila-Pires (1995) |
| Scincidae | <i>Glaphyromorphus</i>              | 0 | Camp 1923; Smith (1935); Jullien and Renous-Lécuru                                                      |

|           |                                        |   |                                                                                                         |
|-----------|----------------------------------------|---|---------------------------------------------------------------------------------------------------------|
|           | <i>gracilipes</i>                      |   | (1972,1973); Estes et al. (1988); Avila-Pires (1995)                                                    |
| Scincidae | <i>Glaphyromorphus isolepis</i>        | 0 | Camp 1923; Smith (1935); Jullien and Renous-Lécuru (1972,1973); Estes et al. (1988); Avila-Pires (1995) |
| Scincidae | <i>Glaphyromorphus mjobergi</i>        | 0 | Camp 1923; Smith (1935); Jullien and Renous-Lécuru (1972,1973); Estes et al. (1988); Avila-Pires (1995) |
| Scincidae | <i>Glaphyromorphus pardalis</i>        | 0 | Camp 1923; Smith (1935); Jullien and Renous-Lécuru (1972,1973); Estes et al. (1988); Avila-Pires (1995) |
| Scincidae | <i>Glaphyromorphus pumilus</i>         | 0 | Camp 1923; Smith (1935); Jullien and Renous-Lécuru (1972,1973); Estes et al. (1988); Avila-Pires (1995) |
| Scincidae | <i>Glaphyromorphus punctulatus</i>     | 0 | Camp 1923; Smith (1935); Jullien and Renous-Lécuru (1972,1973); Estes et al. (1988); Avila-Pires (1995) |
| Scincidae | <i>Gnypetoscincus queenslandiae</i>    | 0 | Camp 1923; Smith (1935); Jullien and Renous-Lécuru (1972,1973); Estes et al. (1988); Avila-Pires (1995) |
| Scincidae | <i>Gongylomorphus bojerii</i>          | 0 | Camp 1923; Smith (1935); Jullien and Renous-Lécuru (1972,1973); Estes et al. (1988); Avila-Pires (1995) |
| Scincidae | <i>Graciliscincus shonae</i>           | 0 | Camp 1923; Smith (1935); Jullien and Renous-Lécuru (1972,1973); Estes et al. (1988); Avila-Pires (1995) |
| Scincidae | <i>Hakaria simonyi</i>                 | 0 | Camp 1923; Smith (1935); Jullien and Renous-Lécuru (1972,1973); Estes et al. (1988); Avila-Pires (1995) |
| Scincidae | <i>Hemiergis decreisiensis</i>         | 0 | Camp 1923; Smith (1935); Jullien and Renous-Lécuru (1972,1973); Estes et al. (1988); Avila-Pires (1995) |
| Scincidae | <i>Hemiergis initialis</i>             | 0 | Camp 1923; Smith (1935); Jullien and Renous-Lécuru (1972,1973); Estes et al. (1988); Avila-Pires (1995) |
| Scincidae | <i>Hemiergis millewae</i>              | 0 | Camp 1923; Smith (1935); Jullien and Renous-Lécuru (1972,1973); Estes et al. (1988); Avila-Pires (1995) |
| Scincidae | <i>Hemiergis peronii</i>               | 0 | Camp 1923; Smith (1935); Jullien and Renous-Lécuru (1972,1973); Estes et al. (1988); Avila-Pires (1995) |
| Scincidae | <i>Hemiergis quadrilineatum</i>        | 0 | Camp 1923; Smith (1935); Jullien and Renous-Lécuru (1972,1973); Estes et al. (1988); Avila-Pires (1995) |
| Scincidae | <i>Isopachys anguinoides</i>           | 0 | Camp 1923; Smith (1935); Jullien and Renous-Lécuru (1972,1973); Estes et al. (1988); Avila-Pires (1995) |
| Scincidae | <i>Janetaescincus braueri</i>          | 0 | Camp 1923; Smith (1935); Jullien and Renous-Lécuru (1972,1973); Estes et al. (1988); Avila-Pires (1995) |
| Scincidae | <i>Janetaescincus veseyfitzgeraldi</i> | 0 | Camp 1923; Smith (1935); Jullien and Renous-Lécuru (1972,1973); Estes et al. (1988); Avila-Pires (1995) |
| Scincidae | <i>Kanakysaurus viviparus</i>          | 0 | Camp 1923; Smith (1935); Jullien and Renous-Lécuru (1972,1973); Estes et al. (1988); Avila-Pires (1995) |
| Scincidae | <i>Lacertaspis chriswildi</i>          | 0 | Camp 1923; Smith (1935); Jullien and Renous-Lécuru (1972,1973); Estes et al. (1988); Avila-Pires (1995) |
| Scincidae | <i>Lacertaspis gemmiventris</i>        | 0 | Camp 1923; Smith (1935); Jullien and Renous-Lécuru (1972,1973); Estes et al. (1988); Avila-Pires (1995) |
| Scincidae | <i>Lacertaspis lepesmei</i>            | 0 | Camp 1923; Smith (1935); Jullien and Renous-Lécuru (1972,1973); Estes et al. (1988); Avila-Pires (1995) |
| Scincidae | <i>Lacertaspis reichenowi</i>          | 0 | Camp 1923; Smith (1935); Jullien and Renous-Lécuru (1972,1973); Estes et al. (1988); Avila-Pires (1995) |
| Scincidae | <i>Lacertaspis rohdei</i>              | 0 | Camp 1923; Smith (1935); Jullien and Renous-Lécuru (1972,1973); Estes et al. (1988); Avila-Pires (1995) |
| Scincidae | <i>Lacertoides pardalis</i>            | 0 | Camp 1923; Smith (1935); Jullien and Renous-Lécuru (1972,1973); Estes et al. (1988); Avila-Pires (1995) |
| Scincidae | <i>Lamprolepis smaragdina</i>          | 0 | Camp 1923; Smith (1935); Jullien and Renous-Lécuru (1972,1973); Estes et al. (1988); Avila-Pires (1995) |
| Scincidae | <i>Lampropholis coggeri</i>            | 0 | Camp 1923; Smith (1935); Jullien and Renous-Lécuru (1972,1973); Estes et al. (1988); Avila-Pires (1995) |
| Scincidae | <i>Lampropholis delicata</i>           | 0 | Camp 1923; Smith (1935); Jullien and Renous-Lécuru (1972,1973); Estes et al. (1988); Avila-Pires (1995) |
| Scincidae | <i>Lampropholis guichenoti</i>         | 0 | Camp 1923; Smith (1935); Jullien and Renous-Lécuru (1972,1973); Estes et al. (1988); Avila-Pires (1995) |
| Scincidae | <i>Lampropholis robertsi</i>           | 0 | Camp 1923; Smith (1935); Jullien and Renous-Lécuru (1972,1973); Estes et al. (1988); Avila-Pires (1995) |

|           |                                     |   |                                                                                                         |
|-----------|-------------------------------------|---|---------------------------------------------------------------------------------------------------------|
| Scincidae | <i>Lankascincus fallax</i>          | 0 | Camp 1923; Smith (1935); Jullien and Renous-Lécure (1972,1973); Estes et al. (1988); Avila-Pires (1995) |
| Scincidae | <i>Larutia seribuatensis</i>        | 0 | Camp 1923; Smith (1935); Jullien and Renous-Lécure (1972,1973); Estes et al. (1988); Avila-Pires (1995) |
| Scincidae | <i>Leiopisma mauritiana</i>         | 0 | Camp 1923; Smith (1935); Jullien and Renous-Lécure (1972,1973); Estes et al. (1988); Avila-Pires (1995) |
| Scincidae | <i>Leiopisma telfairii</i>          | 0 | Camp 1923; Smith (1935); Jullien and Renous-Lécure (1972,1973); Estes et al. (1988); Avila-Pires (1995) |
| Scincidae | <i>Lepidothyris fernandi</i>        | 0 | Camp 1923; Smith (1935); Jullien and Renous-Lécure (1972,1973); Estes et al. (1988); Avila-Pires (1995) |
| Scincidae | <i>Leptosiaphos amieti</i>          | 0 | Camp 1923; Smith (1935); Jullien and Renous-Lécure (1972,1973); Estes et al. (1988); Avila-Pires (1995) |
| Scincidae | <i>Leptosiaphos graueri</i>         | 0 | Camp 1923; Smith (1935); Jullien and Renous-Lécure (1972,1973); Estes et al. (1988); Avila-Pires (1995) |
| Scincidae | <i>Leptosiaphos hackarsi</i>        | 0 | Camp 1923; Smith (1935); Jullien and Renous-Lécure (1972,1973); Estes et al. (1988); Avila-Pires (1995) |
| Scincidae | <i>Leptosiaphos kilimensis</i>      | 0 | Camp 1923; Smith (1935); Jullien and Renous-Lécure (1972,1973); Estes et al. (1988); Avila-Pires (1995) |
| Scincidae | <i>Leptosiaphos vigintiserierum</i> | 0 | Camp 1923; Smith (1935); Jullien and Renous-Lécure (1972,1973); Estes et al. (1988); Avila-Pires (1995) |
| Scincidae | <i>Lerista aericeps</i>             | 0 | Camp 1923; Smith (1935); Jullien and Renous-Lécure (1972,1973); Estes et al. (1988); Avila-Pires (1995) |
| Scincidae | <i>Lerista allochira</i>            | 0 | Camp 1923; Smith (1935); Jullien and Renous-Lécure (1972,1973); Estes et al. (1988); Avila-Pires (1995) |
| Scincidae | <i>Lerista ameles</i>               | 0 | Camp 1923; Smith (1935); Jullien and Renous-Lécure (1972,1973); Estes et al. (1988); Avila-Pires (1995) |
| Scincidae | <i>Lerista apoda</i>                | 0 | Camp 1923; Smith (1935); Jullien and Renous-Lécure (1972,1973); Estes et al. (1988); Avila-Pires (1995) |
| Scincidae | <i>Lerista arenicola</i>            | 0 | Camp 1923; Smith (1935); Jullien and Renous-Lécure (1972,1973); Estes et al. (1988); Avila-Pires (1995) |
| Scincidae | <i>Lerista axillaris</i>            | 0 | Camp 1923; Smith (1935); Jullien and Renous-Lécure (1972,1973); Estes et al. (1988); Avila-Pires (1995) |
| Scincidae | <i>Lerista baynesi</i>              | 0 | Camp 1923; Smith (1935); Jullien and Renous-Lécure (1972,1973); Estes et al. (1988); Avila-Pires (1995) |
| Scincidae | <i>Lerista bipes</i>                | 0 | Camp 1923; Smith (1935); Jullien and Renous-Lécure (1972,1973); Estes et al. (1988); Avila-Pires (1995) |
| Scincidae | <i>Lerista borealis</i>             | 0 | Camp 1923; Smith (1935); Jullien and Renous-Lécure (1972,1973); Estes et al. (1988); Avila-Pires (1995) |
| Scincidae | <i>Lerista bougainvillii</i>        | 0 | Camp 1923; Smith (1935); Jullien and Renous-Lécure (1972,1973); Estes et al. (1988); Avila-Pires (1995) |
| Scincidae | <i>Lerista carpentariae</i>         | 0 | Camp 1923; Smith (1935); Jullien and Renous-Lécure (1972,1973); Estes et al. (1988); Avila-Pires (1995) |
| Scincidae | <i>Lerista chordae</i>              | 0 | Camp 1923; Smith (1935); Jullien and Renous-Lécure (1972,1973); Estes et al. (1988); Avila-Pires (1995) |
| Scincidae | <i>Lerista christinae</i>           | 0 | Camp 1923; Smith (1935); Jullien and Renous-Lécure (1972,1973); Estes et al. (1988); Avila-Pires (1995) |
| Scincidae | <i>Lerista cinerea</i>              | 0 | Camp 1923; Smith (1935); Jullien and Renous-Lécure (1972,1973); Estes et al. (1988); Avila-Pires (1995) |
| Scincidae | <i>Lerista connivens</i>            | 0 | Camp 1923; Smith (1935); Jullien and Renous-Lécure (1972,1973); Estes et al. (1988); Avila-Pires (1995) |
| Scincidae | <i>Lerista desertorum</i>           | 0 | Camp 1923; Smith (1935); Jullien and Renous-Lécure (1972,1973); Estes et al. (1988); Avila-Pires (1995) |
| Scincidae | <i>Lerista distinguenda</i>         | 0 | Camp 1923; Smith (1935); Jullien and Renous-Lécure (1972,1973); Estes et al. (1988); Avila-Pires (1995) |
| Scincidae | <i>Lerista dorsalis</i>             | 0 | Camp 1923; Smith (1935); Jullien and Renous-Lécure (1972,1973); Estes et al. (1988); Avila-Pires (1995) |
| Scincidae | <i>Lerista edwardsae</i>            | 0 | Camp 1923; Smith (1935); Jullien and Renous-Lécure (1972,1973); Estes et al. (1988); Avila-Pires (1995) |
| Scincidae | <i>Lerista elegans</i>              | 0 | Camp 1923; Smith (1935); Jullien and Renous-Lécure                                                      |

|           |                                |   |                                                                                                         |
|-----------|--------------------------------|---|---------------------------------------------------------------------------------------------------------|
|           |                                |   | (1972,1973); Estes et al. (1988); Avila-Pires (1995)                                                    |
| Scincidae | <i>Lerista elongata</i>        | 0 | Camp 1923; Smith (1935); Jullien and Renous-Lécuru (1972,1973); Estes et al. (1988); Avila-Pires (1995) |
| Scincidae | <i>Lerista emmotti</i>         | 0 | Camp 1923; Smith (1935); Jullien and Renous-Lécuru (1972,1973); Estes et al. (1988); Avila-Pires (1995) |
| Scincidae | <i>Lerista eupoda</i>          | 0 | Camp 1923; Smith (1935); Jullien and Renous-Lécuru (1972,1973); Estes et al. (1988); Avila-Pires (1995) |
| Scincidae | <i>Lerista flammicauda</i>     | 0 | Camp 1923; Smith (1935); Jullien and Renous-Lécuru (1972,1973); Estes et al. (1988); Avila-Pires (1995) |
| Scincidae | <i>Lerista fragilis</i>        | 0 | Camp 1923; Smith (1935); Jullien and Renous-Lécuru (1972,1973); Estes et al. (1988); Avila-Pires (1995) |
| Scincidae | <i>Lerista frosti</i>          | 0 | Camp 1923; Smith (1935); Jullien and Renous-Lécuru (1972,1973); Estes et al. (1988); Avila-Pires (1995) |
| Scincidae | <i>Lerista gascoynensis</i>    | 0 | Camp 1923; Smith (1935); Jullien and Renous-Lécuru (1972,1973); Estes et al. (1988); Avila-Pires (1995) |
| Scincidae | <i>Lerista gerrardii</i>       | 0 | Camp 1923; Smith (1935); Jullien and Renous-Lécuru (1972,1973); Estes et al. (1988); Avila-Pires (1995) |
| Scincidae | <i>Lerista greeri</i>          | 0 | Camp 1923; Smith (1935); Jullien and Renous-Lécuru (1972,1973); Estes et al. (1988); Avila-Pires (1995) |
| Scincidae | <i>Lerista griffini</i>        | 0 | Camp 1923; Smith (1935); Jullien and Renous-Lécuru (1972,1973); Estes et al. (1988); Avila-Pires (1995) |
| Scincidae | <i>Lerista haroldi</i>         | 0 | Camp 1923; Smith (1935); Jullien and Renous-Lécuru (1972,1973); Estes et al. (1988); Avila-Pires (1995) |
| Scincidae | <i>Lerista humphriesi</i>      | 0 | Camp 1923; Smith (1935); Jullien and Renous-Lécuru (1972,1973); Estes et al. (1988); Avila-Pires (1995) |
| Scincidae | <i>Lerista ingrami</i>         | 0 | Camp 1923; Smith (1935); Jullien and Renous-Lécuru (1972,1973); Estes et al. (1988); Avila-Pires (1995) |
| Scincidae | <i>Lerista ips</i>             | 0 | Camp 1923; Smith (1935); Jullien and Renous-Lécuru (1972,1973); Estes et al. (1988); Avila-Pires (1995) |
| Scincidae | <i>Lerista kalumburu</i>       | 0 | Camp 1923; Smith (1935); Jullien and Renous-Lécuru (1972,1973); Estes et al. (1988); Avila-Pires (1995) |
| Scincidae | <i>Lerista karlschmidti</i>    | 0 | Camp 1923; Smith (1935); Jullien and Renous-Lécuru (1972,1973); Estes et al. (1988); Avila-Pires (1995) |
| Scincidae | <i>Lerista kendricki</i>       | 0 | Camp 1923; Smith (1935); Jullien and Renous-Lécuru (1972,1973); Estes et al. (1988); Avila-Pires (1995) |
| Scincidae | <i>Lerista kennedyensis</i>    | 0 | Camp 1923; Smith (1935); Jullien and Renous-Lécuru (1972,1973); Estes et al. (1988); Avila-Pires (1995) |
| Scincidae | <i>Lerista labialis</i>        | 0 | Camp 1923; Smith (1935); Jullien and Renous-Lécuru (1972,1973); Estes et al. (1988); Avila-Pires (1995) |
| Scincidae | <i>Lerista lineata</i>         | 0 | Camp 1923; Smith (1935); Jullien and Renous-Lécuru (1972,1973); Estes et al. (1988); Avila-Pires (1995) |
| Scincidae | <i>Lerista lineopunctulata</i> | 0 | Camp 1923; Smith (1935); Jullien and Renous-Lécuru (1972,1973); Estes et al. (1988); Avila-Pires (1995) |
| Scincidae | <i>Lerista macropisthopus</i>  | 0 | Camp 1923; Smith (1935); Jullien and Renous-Lécuru (1972,1973); Estes et al. (1988); Avila-Pires (1995) |
| Scincidae | <i>Lerista microtis</i>        | 0 | Camp 1923; Smith (1935); Jullien and Renous-Lécuru (1972,1973); Estes et al. (1988); Avila-Pires (1995) |
| Scincidae | <i>Lerista muelleri</i>        | 0 | Camp 1923; Smith (1935); Jullien and Renous-Lécuru (1972,1973); Estes et al. (1988); Avila-Pires (1995) |
| Scincidae | <i>Lerista neander</i>         | 0 | Camp 1923; Smith (1935); Jullien and Renous-Lécuru (1972,1973); Estes et al. (1988); Avila-Pires (1995) |
| Scincidae | <i>Lerista nichollsi</i>       | 0 | Camp 1923; Smith (1935); Jullien and Renous-Lécuru (1972,1973); Estes et al. (1988); Avila-Pires (1995) |
| Scincidae | <i>Lerista onsloviana</i>      | 0 | Camp 1923; Smith (1935); Jullien and Renous-Lécuru (1972,1973); Estes et al. (1988); Avila-Pires (1995) |
| Scincidae | <i>Lerista orientalis</i>      | 0 | Camp 1923; Smith (1935); Jullien and Renous-Lécuru (1972,1973); Estes et al. (1988); Avila-Pires (1995) |
| Scincidae | <i>Lerista petersoni</i>       | 0 | Camp 1923; Smith (1935); Jullien and Renous-Lécuru (1972,1973); Estes et al. (1988); Avila-Pires (1995) |

|           |                                    |   |                                                                                                         |
|-----------|------------------------------------|---|---------------------------------------------------------------------------------------------------------|
| Scincidae | <i>Lerista picturata</i>           | 0 | Camp 1923; Smith (1935); Jullien and Renous-Lécure (1972,1973); Estes et al. (1988); Avila-Pires (1995) |
| Scincidae | <i>Lerista planiventralis</i>      | 0 | Camp 1923; Smith (1935); Jullien and Renous-Lécure (1972,1973); Estes et al. (1988); Avila-Pires (1995) |
| Scincidae | <i>Lerista praepedita</i>          | 0 | Camp 1923; Smith (1935); Jullien and Renous-Lécure (1972,1973); Estes et al. (1988); Avila-Pires (1995) |
| Scincidae | <i>Lerista punctatovittata</i>     | 0 | Camp 1923; Smith (1935); Jullien and Renous-Lécure (1972,1973); Estes et al. (1988); Avila-Pires (1995) |
| Scincidae | <i>Lerista puncticauda</i>         | 0 | Camp 1923; Smith (1935); Jullien and Renous-Lécure (1972,1973); Estes et al. (1988); Avila-Pires (1995) |
| Scincidae | <i>Lerista robusta</i>             | 0 | Camp 1923; Smith (1935); Jullien and Renous-Lécure (1972,1973); Estes et al. (1988); Avila-Pires (1995) |
| Scincidae | <i>Lerista simillima</i>           | 0 | Camp 1923; Smith (1935); Jullien and Renous-Lécure (1972,1973); Estes et al. (1988); Avila-Pires (1995) |
| Scincidae | <i>Lerista speciosa</i>            | 0 | Camp 1923; Smith (1935); Jullien and Renous-Lécure (1972,1973); Estes et al. (1988); Avila-Pires (1995) |
| Scincidae | <i>Lerista stictopleura</i>        | 0 | Camp 1923; Smith (1935); Jullien and Renous-Lécure (1972,1973); Estes et al. (1988); Avila-Pires (1995) |
| Scincidae | <i>Lerista stylis</i>              | 0 | Camp 1923; Smith (1935); Jullien and Renous-Lécure (1972,1973); Estes et al. (1988); Avila-Pires (1995) |
| Scincidae | <i>Lerista taeniata</i>            | 0 | Camp 1923; Smith (1935); Jullien and Renous-Lécure (1972,1973); Estes et al. (1988); Avila-Pires (1995) |
| Scincidae | <i>Lerista terdigitata</i>         | 0 | Camp 1923; Smith (1935); Jullien and Renous-Lécure (1972,1973); Estes et al. (1988); Avila-Pires (1995) |
| Scincidae | <i>Lerista tridactyla</i>          | 0 | Camp 1923; Smith (1935); Jullien and Renous-Lécure (1972,1973); Estes et al. (1988); Avila-Pires (1995) |
| Scincidae | <i>Lerista uniduo</i>              | 0 | Camp 1923; Smith (1935); Jullien and Renous-Lécure (1972,1973); Estes et al. (1988); Avila-Pires (1995) |
| Scincidae | <i>Lerista varia</i>               | 0 | Camp 1923; Smith (1935); Jullien and Renous-Lécure (1972,1973); Estes et al. (1988); Avila-Pires (1995) |
| Scincidae | <i>Lerista vermicularis</i>        | 0 | Camp 1923; Smith (1935); Jullien and Renous-Lécure (1972,1973); Estes et al. (1988); Avila-Pires (1995) |
| Scincidae | <i>Lerista viduata</i>             | 0 | Camp 1923; Smith (1935); Jullien and Renous-Lécure (1972,1973); Estes et al. (1988); Avila-Pires (1995) |
| Scincidae | <i>Lerista walkeri</i>             | 0 | Camp 1923; Smith (1935); Jullien and Renous-Lécure (1972,1973); Estes et al. (1988); Avila-Pires (1995) |
| Scincidae | <i>Lerista wilkinsi</i>            | 0 | Camp 1923; Smith (1935); Jullien and Renous-Lécure (1972,1973); Estes et al. (1988); Avila-Pires (1995) |
| Scincidae | <i>Lerista xanthura</i>            | 0 | Camp 1923; Smith (1935); Jullien and Renous-Lécure (1972,1973); Estes et al. (1988); Avila-Pires (1995) |
| Scincidae | <i>Lerista yuna</i>                | 0 | Camp 1923; Smith (1935); Jullien and Renous-Lécure (1972,1973); Estes et al. (1988); Avila-Pires (1995) |
| Scincidae | <i>Lerista zietzi</i>              | 0 | Camp 1923; Smith (1935); Jullien and Renous-Lécure (1972,1973); Estes et al. (1988); Avila-Pires (1995) |
| Scincidae | <i>Lerista zonulata</i>            | 0 | Camp 1923; Smith (1935); Jullien and Renous-Lécure (1972,1973); Estes et al. (1988); Avila-Pires (1995) |
| Scincidae | <i>Lioscincus maruia</i>           | 0 | Camp 1923; Smith (1935); Jullien and Renous-Lécure (1972,1973); Estes et al. (1988); Avila-Pires (1995) |
| Scincidae | <i>Lioscincus nigrofasciolatum</i> | 0 | Camp 1923; Smith (1935); Jullien and Renous-Lécure (1972,1973); Estes et al. (1988); Avila-Pires (1995) |
| Scincidae | <i>Lioscincus novaecaledoniae</i>  | 0 | Camp 1923; Smith (1935); Jullien and Renous-Lécure (1972,1973); Estes et al. (1988); Avila-Pires (1995) |
| Scincidae | <i>Lioscincus steindachneri</i>    | 0 | Camp 1923; Smith (1935); Jullien and Renous-Lécure (1972,1973); Estes et al. (1988); Avila-Pires (1995) |
| Scincidae | <i>Lioscincus tillieri</i>         | 0 | Camp 1923; Smith (1935); Jullien and Renous-Lécure (1972,1973); Estes et al. (1988); Avila-Pires (1995) |
| Scincidae | <i>Lioscincus vivae</i>            | 0 | Camp 1923; Smith (1935); Jullien and Renous-Lécure (1972,1973); Estes et al. (1988); Avila-Pires (1995) |
| Scincidae | <i>Lipinia noctua</i>              | 0 | Camp 1923; Smith (1935); Jullien and Renous-Lécure                                                      |

|           |                                |   |                                                                                                         |
|-----------|--------------------------------|---|---------------------------------------------------------------------------------------------------------|
|           |                                |   | (1972,1973); Estes et al. (1988); Avila-Pires (1995)                                                    |
| Scincidae | <i>Lipinia pulchella</i>       | 0 | Camp 1923; Smith (1935); Jullien and Renous-Lécuru (1972,1973); Estes et al. (1988); Avila-Pires (1995) |
| Scincidae | <i>Lipinia vittigera</i>       | 0 | Camp 1923; Smith (1935); Jullien and Renous-Lécuru (1972,1973); Estes et al. (1988); Avila-Pires (1995) |
| Scincidae | <i>Lygisaurus abscondita</i>   | 0 | Camp 1923; Smith (1935); Jullien and Renous-Lécuru (1972,1973); Estes et al. (1988); Avila-Pires (1995) |
| Scincidae | <i>Lygisaurus aeratus</i>      | 0 | Camp 1923; Smith (1935); Jullien and Renous-Lécuru (1972,1973); Estes et al. (1988); Avila-Pires (1995) |
| Scincidae | <i>Lygisaurus foliorum</i>     | 0 | Camp 1923; Smith (1935); Jullien and Renous-Lécuru (1972,1973); Estes et al. (1988); Avila-Pires (1995) |
| Scincidae | <i>Lygisaurus laevis</i>       | 0 | Camp 1923; Smith (1935); Jullien and Renous-Lécuru (1972,1973); Estes et al. (1988); Avila-Pires (1995) |
| Scincidae | <i>Lygisaurus macfarlani</i>   | 0 | Camp 1923; Smith (1935); Jullien and Renous-Lécuru (1972,1973); Estes et al. (1988); Avila-Pires (1995) |
| Scincidae | <i>Lygisaurus malleolus</i>    | 0 | Camp 1923; Smith (1935); Jullien and Renous-Lécuru (1972,1973); Estes et al. (1988); Avila-Pires (1995) |
| Scincidae | <i>Lygisaurus novaeguineae</i> | 0 | Camp 1923; Smith (1935); Jullien and Renous-Lécuru (1972,1973); Estes et al. (1988); Avila-Pires (1995) |
| Scincidae | <i>Lygisaurus parrhasius</i>   | 0 | Camp 1923; Smith (1935); Jullien and Renous-Lécuru (1972,1973); Estes et al. (1988); Avila-Pires (1995) |
| Scincidae | <i>Lygisaurus sesbrauna</i>    | 0 | Camp 1923; Smith (1935); Jullien and Renous-Lécuru (1972,1973); Estes et al. (1988); Avila-Pires (1995) |
| Scincidae | <i>Lygisaurus tanneri</i>      | 0 | Camp 1923; Smith (1935); Jullien and Renous-Lécuru (1972,1973); Estes et al. (1988); Avila-Pires (1995) |
| Scincidae | <i>Lygosoma afrum</i>          | 0 | Camp 1923; Smith (1935); Jullien and Renous-Lécuru (1972,1973); Estes et al. (1988); Avila-Pires (1995) |
| Scincidae | <i>Lygosoma albopunctata</i>   | 0 | Camp 1923; Smith (1935); Jullien and Renous-Lécuru (1972,1973); Estes et al. (1988); Avila-Pires (1995) |
| Scincidae | <i>Lygosoma bowringii</i>      | 0 | Camp 1923; Smith (1935); Jullien and Renous-Lécuru (1972,1973); Estes et al. (1988); Avila-Pires (1995) |
| Scincidae | <i>Lygosoma koratense</i>      | 0 | Camp 1923; Smith (1935); Jullien and Renous-Lécuru (1972,1973); Estes et al. (1988); Avila-Pires (1995) |
| Scincidae | <i>Lygosoma lineolatum</i>     | 0 | Camp 1923; Smith (1935); Jullien and Renous-Lécuru (1972,1973); Estes et al. (1988); Avila-Pires (1995) |
| Scincidae | <i>Lygosoma punctata</i>       | 0 | Camp 1923; Smith (1935); Jullien and Renous-Lécuru (1972,1973); Estes et al. (1988); Avila-Pires (1995) |
| Scincidae | <i>Lygosoma quadrupes</i>      | 0 | Camp 1923; Smith (1935); Jullien and Renous-Lécuru (1972,1973); Estes et al. (1988); Avila-Pires (1995) |
| Scincidae | <i>Mabuya agilis</i>           | 0 | Camp 1923; Smith (1935); Jullien and Renous-Lécuru (1972,1973); Estes et al. (1988); Avila-Pires (1995) |
| Scincidae | <i>Mabuya agmosticha</i>       | 0 | Camp 1923; Smith (1935); Jullien and Renous-Lécuru (1972,1973); Estes et al. (1988); Avila-Pires (1995) |
| Scincidae | <i>Mabuya altamazonica</i>     | 0 | Camp 1923; Smith (1935); Jullien and Renous-Lécuru (1972,1973); Estes et al. (1988); Avila-Pires (1995) |
| Scincidae | <i>Mabuya bistrata</i>         | 0 | Camp 1923; Smith (1935); Jullien and Renous-Lécuru (1972,1973); Estes et al. (1988); Avila-Pires (1995) |
| Scincidae | <i>Mabuya caissara</i>         | 0 | Camp 1923; Smith (1935); Jullien and Renous-Lécuru (1972,1973); Estes et al. (1988); Avila-Pires (1995) |
| Scincidae | <i>Mabuya carvalhoi</i>        | 0 | Camp 1923; Smith (1935); Jullien and Renous-Lécuru (1972,1973); Estes et al. (1988); Avila-Pires (1995) |
| Scincidae | <i>Mabuya cochabambae</i>      | 0 | Camp 1923; Smith (1935); Jullien and Renous-Lécuru (1972,1973); Estes et al. (1988); Avila-Pires (1995) |
| Scincidae | <i>Mabuya croizati</i>         | 0 | Camp 1923; Smith (1935); Jullien and Renous-Lécuru (1972,1973); Estes et al. (1988); Avila-Pires (1995) |
| Scincidae | <i>Mabuya dorsivittata</i>     | 0 | Camp 1923; Smith (1935); Jullien and Renous-Lécuru (1972,1973); Estes et al. (1988); Avila-Pires (1995) |
| Scincidae | <i>Mabuya falconensis</i>      | 0 | Camp 1923; Smith (1935); Jullien and Renous-Lécuru (1972,1973); Estes et al. (1988); Avila-Pires (1995) |



|           |                                  |   |                                                                                                         |
|-----------|----------------------------------|---|---------------------------------------------------------------------------------------------------------|
| Scincidae | <i>Mabuya frenata</i>            | 0 | Camp 1923; Smith (1935); Jullien and Renous-Lécure (1972,1973); Estes et al. (1988); Avila-Pires (1995) |
| Scincidae | <i>Mabuya guaporicola</i>        | 0 | Camp 1923; Smith (1935); Jullien and Renous-Lécure (1972,1973); Estes et al. (1988); Avila-Pires (1995) |
| Scincidae | <i>Mabuya heathi</i>             | 0 | Camp 1923; Smith (1935); Jullien and Renous-Lécure (1972,1973); Estes et al. (1988); Avila-Pires (1995) |
| Scincidae | <i>Mabuya mabouya</i>            | 0 | Camp 1923; Smith (1935); Jullien and Renous-Lécure (1972,1973); Estes et al. (1988); Avila-Pires (1995) |
| Scincidae | <i>Mabuya macrophthalma</i>      | 0 | Camp 1923; Smith (1935); Jullien and Renous-Lécure (1972,1973); Estes et al. (1988); Avila-Pires (1995) |
| Scincidae | <i>Mabuya macrorhyncha</i>       | 0 | Camp 1923; Smith (1935); Jullien and Renous-Lécure (1972,1973); Estes et al. (1988); Avila-Pires (1995) |
| Scincidae | <i>Mabuya meridensis</i>         | 0 | Camp 1923; Smith (1935); Jullien and Renous-Lécure (1972,1973); Estes et al. (1988); Avila-Pires (1995) |
| Scincidae | <i>Mabuya nigropalmata</i>       | 0 | Camp 1923; Smith (1935); Jullien and Renous-Lécure (1972,1973); Estes et al. (1988); Avila-Pires (1995) |
| Scincidae | <i>Mabuya nigropunctata</i>      | 0 | Camp 1923; Smith (1935); Jullien and Renous-Lécure (1972,1973); Estes et al. (1988); Avila-Pires (1995) |
| Scincidae | <i>Mabuya sloanii</i>            | 0 | Camp 1923; Smith (1935); Jullien and Renous-Lécure (1972,1973); Estes et al. (1988); Avila-Pires (1995) |
| Scincidae | <i>Mabuya unimarginata</i>       | 0 | Camp 1923; Smith (1935); Jullien and Renous-Lécure (1972,1973); Estes et al. (1988); Avila-Pires (1995) |
| Scincidae | <i>Macrocercus coctei</i>        | 0 | Camp 1923; Smith (1935); Jullien and Renous-Lécure (1972,1973); Estes et al. (1988); Avila-Pires (1995) |
| Scincidae | <i>Madascincus igneocaudatus</i> | 0 | Camp 1923; Smith (1935); Jullien and Renous-Lécure (1972,1973); Estes et al. (1988); Avila-Pires (1995) |
| Scincidae | <i>Madascincus intermedius</i>   | 0 | Camp 1923; Smith (1935); Jullien and Renous-Lécure (1972,1973); Estes et al. (1988); Avila-Pires (1995) |
| Scincidae | <i>Madascincus melanopleura</i>  | 0 | Camp 1923; Smith (1935); Jullien and Renous-Lécure (1972,1973); Estes et al. (1988); Avila-Pires (1995) |
| Scincidae | <i>Madascincus mouroundavae</i>  | 0 | Camp 1923; Smith (1935); Jullien and Renous-Lécure (1972,1973); Estes et al. (1988); Avila-Pires (1995) |
| Scincidae | <i>Madascincus stumpffi</i>      | 0 | Camp 1923; Smith (1935); Jullien and Renous-Lécure (1972,1973); Estes et al. (1988); Avila-Pires (1995) |
| Scincidae | <i>Marmorosphax montana</i>      | 0 | Camp 1923; Smith (1935); Jullien and Renous-Lécure (1972,1973); Estes et al. (1988); Avila-Pires (1995) |
| Scincidae | <i>Marmorosphax tricolor</i>     | 0 | Camp 1923; Smith (1935); Jullien and Renous-Lécure (1972,1973); Estes et al. (1988); Avila-Pires (1995) |
| Scincidae | <i>Melanoseps ater</i>           | 0 | Camp 1923; Smith (1935); Jullien and Renous-Lécure (1972,1973); Estes et al. (1988); Avila-Pires (1995) |
| Scincidae | <i>Melanoseps loveridgei</i>     | 0 | Camp 1923; Smith (1935); Jullien and Renous-Lécure (1972,1973); Estes et al. (1988); Avila-Pires (1995) |
| Scincidae | <i>Melanoseps occidentalis</i>   | 0 | Camp 1923; Smith (1935); Jullien and Renous-Lécure (1972,1973); Estes et al. (1988); Avila-Pires (1995) |
| Scincidae | <i>Menetia alanae</i>            | 0 | Camp 1923; Smith (1935); Jullien and Renous-Lécure (1972,1973); Estes et al. (1988); Avila-Pires (1995) |
| Scincidae | <i>Menetia greyii</i>            | 0 | Camp 1923; Smith (1935); Jullien and Renous-Lécure (1972,1973); Estes et al. (1988); Avila-Pires (1995) |
| Scincidae | <i>Menetia timlowi</i>           | 0 | Camp 1923; Smith (1935); Jullien and Renous-Lécure (1972,1973); Estes et al. (1988); Avila-Pires (1995) |
| Scincidae | <i>Mesoscincus managuae</i>      | 0 | Camp 1923; Smith (1935); Jullien and Renous-Lécure (1972,1973); Estes et al. (1988); Avila-Pires (1995) |
| Scincidae | <i>Mesoscincus schwartzei</i>    | 0 | Camp 1923; Smith (1935); Jullien and Renous-Lécure (1972,1973); Estes et al. (1988); Avila-Pires (1995) |
| Scincidae | <i>Microacontias lineatus</i>    | 0 | Camp 1923; Smith (1935); Jullien and Renous-Lécure (1972,1973); Estes et al. (1988); Avila-Pires (1995) |
| Scincidae | <i>Microacontias litoralis</i>   | 0 | Camp 1923; Smith (1935); Jullien and Renous-Lécure (1972,1973); Estes et al. (1988); Avila-Pires (1995) |
| Scincidae | <i>Mochlus</i>                   | 0 | Camp 1923; Smith (1935); Jullien and Renous-Lécure                                                      |

|           |                                 |   |                                                                                                         |
|-----------|---------------------------------|---|---------------------------------------------------------------------------------------------------------|
|           | <i>brevicaudis</i>              |   | (1972,1973); Estes et al. (1988); Avila-Pires (1995)                                                    |
| Scincidae | <i>Mochlus sundevalli</i>       | 0 | Camp 1923; Smith (1935); Jullien and Renous-Lécuru (1972,1973); Estes et al. (1988); Avila-Pires (1995) |
| Scincidae | <i>Morethia adelaidensis</i>    | 0 | Camp 1923; Smith (1935); Jullien and Renous-Lécuru (1972,1973); Estes et al. (1988); Avila-Pires (1995) |
| Scincidae | <i>Morethia butleri</i>         | 0 | Camp 1923; Smith (1935); Jullien and Renous-Lécuru (1972,1973); Estes et al. (1988); Avila-Pires (1995) |
| Scincidae | <i>Morethia ruficauda</i>       | 0 | Camp 1923; Smith (1935); Jullien and Renous-Lécuru (1972,1973); Estes et al. (1988); Avila-Pires (1995) |
| Scincidae | <i>Nangura spinosa</i>          | 0 | Camp 1923; Smith (1935); Jullien and Renous-Lécuru (1972,1973); Estes et al. (1988); Avila-Pires (1995) |
| Scincidae | <i>Nannoscincus garrulus</i>    | 0 | Camp 1923; Smith (1935); Jullien and Renous-Lécuru (1972,1973); Estes et al. (1988); Avila-Pires (1995) |
| Scincidae | <i>Nannoscincus gracilis</i>    | 0 | Camp 1923; Smith (1935); Jullien and Renous-Lécuru (1972,1973); Estes et al. (1988); Avila-Pires (1995) |
| Scincidae | <i>Nannoscincus greeri</i>      | 0 | Camp 1923; Smith (1935); Jullien and Renous-Lécuru (1972,1973); Estes et al. (1988); Avila-Pires (1995) |
| Scincidae | <i>Nannoscincus hanchisteus</i> | 0 | Camp 1923; Smith (1935); Jullien and Renous-Lécuru (1972,1973); Estes et al. (1988); Avila-Pires (1995) |
| Scincidae | <i>Nannoscincus humectus</i>    | 0 | Camp 1923; Smith (1935); Jullien and Renous-Lécuru (1972,1973); Estes et al. (1988); Avila-Pires (1995) |
| Scincidae | <i>Nannoscincus mariei</i>      | 0 | Camp 1923; Smith (1935); Jullien and Renous-Lécuru (1972,1973); Estes et al. (1988); Avila-Pires (1995) |
| Scincidae | <i>Nannoscincus slevini</i>     | 0 | Camp 1923; Smith (1935); Jullien and Renous-Lécuru (1972,1973); Estes et al. (1988); Avila-Pires (1995) |
| Scincidae | <i>Niveoscincus greeni</i>      | 0 | Camp 1923; Smith (1935); Jullien and Renous-Lécuru (1972,1973); Estes et al. (1988); Avila-Pires (1995) |
| Scincidae | <i>Niveoscincus metallicus</i>  | 0 | Camp 1923; Smith (1935); Jullien and Renous-Lécuru (1972,1973); Estes et al. (1988); Avila-Pires (1995) |
| Scincidae | <i>Niveoscincus ocellatus</i>   | 0 | Camp 1923; Smith (1935); Jullien and Renous-Lécuru (1972,1973); Estes et al. (1988); Avila-Pires (1995) |
| Scincidae | <i>Niveoscincus pretiosus</i>   | 0 | Camp 1923; Smith (1935); Jullien and Renous-Lécuru (1972,1973); Estes et al. (1988); Avila-Pires (1995) |
| Scincidae | <i>Notoscincus ornatus</i>      | 0 | Camp 1923; Smith (1935); Jullien and Renous-Lécuru (1972,1973); Estes et al. (1988); Avila-Pires (1995) |
| Scincidae | <i>Oligosoma acrinasum</i>      | 0 | Camp 1923; Smith (1935); Jullien and Renous-Lécuru (1972,1973); Estes et al. (1988); Avila-Pires (1995) |
| Scincidae | <i>Oligosoma chloronoton</i>    | 0 | Camp 1923; Smith (1935); Jullien and Renous-Lécuru (1972,1973); Estes et al. (1988); Avila-Pires (1995) |
| Scincidae | <i>Oligosoma fallai</i>         | 0 | Camp 1923; Smith (1935); Jullien and Renous-Lécuru (1972,1973); Estes et al. (1988); Avila-Pires (1995) |
| Scincidae | <i>Oligosoma grande</i>         | 0 | Camp 1923; Smith (1935); Jullien and Renous-Lécuru (1972,1973); Estes et al. (1988); Avila-Pires (1995) |
| Scincidae | <i>Oligosoma homalonotum</i>    | 0 | Camp 1923; Smith (1935); Jullien and Renous-Lécuru (1972,1973); Estes et al. (1988); Avila-Pires (1995) |
| Scincidae | <i>Oligosoma inconspicuum</i>   | 0 | Camp 1923; Smith (1935); Jullien and Renous-Lécuru (1972,1973); Estes et al. (1988); Avila-Pires (1995) |
| Scincidae | <i>Oligosoma infrapunctatum</i> | 0 | Camp 1923; Smith (1935); Jullien and Renous-Lécuru (1972,1973); Estes et al. (1988); Avila-Pires (1995) |
| Scincidae | <i>Oligosoma lineoocellatum</i> | 0 | Camp 1923; Smith (1935); Jullien and Renous-Lécuru (1972,1973); Estes et al. (1988); Avila-Pires (1995) |
| Scincidae | <i>Oligosoma longipes</i>       | 0 | Camp 1923; Smith (1935); Jullien and Renous-Lécuru (1972,1973); Estes et al. (1988); Avila-Pires (1995) |
| Scincidae | <i>Oligosoma maccanni</i>       | 0 | Camp 1923; Smith (1935); Jullien and Renous-Lécuru (1972,1973); Estes et al. (1988); Avila-Pires (1995) |
| Scincidae | <i>Oligosoma microlepis</i>     | 0 | Camp 1923; Smith (1935); Jullien and Renous-Lécuru (1972,1973); Estes et al. (1988); Avila-Pires (1995) |
| Scincidae | <i>Oligosoma moco</i>           | 0 | Camp 1923; Smith (1935); Jullien and Renous-Lécuru (1972,1973); Estes et al. (1988); Avila-Pires (1995) |

|           |                                  |   |                                                                                                         |
|-----------|----------------------------------|---|---------------------------------------------------------------------------------------------------------|
| Scincidae | <i>Oligosoma nigriplantare</i>   | 0 | Camp 1923; Smith (1935); Jullien and Renous-Lécuru (1972,1973); Estes et al. (1988); Avila-Pires (1995) |
| Scincidae | <i>Oligosoma notosaurus</i>      | 0 | Camp 1923; Smith (1935); Jullien and Renous-Lécuru (1972,1973); Estes et al. (1988); Avila-Pires (1995) |
| Scincidae | <i>Oligosoma ottagense</i>       | 0 | Camp 1923; Smith (1935); Jullien and Renous-Lécuru (1972,1973); Estes et al. (1988); Avila-Pires (1995) |
| Scincidae | <i>Oligosoma pikitanga</i>       | 0 | Camp 1923; Smith (1935); Jullien and Renous-Lécuru (1972,1973); Estes et al. (1988); Avila-Pires (1995) |
| Scincidae | <i>Oligosoma smithi</i>          | 0 | Camp 1923; Smith (1935); Jullien and Renous-Lécuru (1972,1973); Estes et al. (1988); Avila-Pires (1995) |
| Scincidae | <i>Oligosoma stenotis</i>        | 0 | Camp 1923; Smith (1935); Jullien and Renous-Lécuru (1972,1973); Estes et al. (1988); Avila-Pires (1995) |
| Scincidae | <i>Oligosoma striatum</i>        | 0 | Camp 1923; Smith (1935); Jullien and Renous-Lécuru (1972,1973); Estes et al. (1988); Avila-Pires (1995) |
| Scincidae | <i>Oligosoma suteri</i>          | 0 | Camp 1923; Smith (1935); Jullien and Renous-Lécuru (1972,1973); Estes et al. (1988); Avila-Pires (1995) |
| Scincidae | <i>Oligosoma taumakae</i>        | 0 | Camp 1923; Smith (1935); Jullien and Renous-Lécuru (1972,1973); Estes et al. (1988); Avila-Pires (1995) |
| Scincidae | <i>Oligosoma waimatense</i>      | 0 | Camp 1923; Smith (1935); Jullien and Renous-Lécuru (1972,1973); Estes et al. (1988); Avila-Pires (1995) |
| Scincidae | <i>Oligosoma zelandicum</i>      | 0 | Camp 1923; Smith (1935); Jullien and Renous-Lécuru (1972,1973); Estes et al. (1988); Avila-Pires (1995) |
| Scincidae | <i>Ophiomorus latastii</i>       | 0 | Camp 1923; Smith (1935); Jullien and Renous-Lécuru (1972,1973); Estes et al. (1988); Avila-Pires (1995) |
| Scincidae | <i>Ophiomorus punctatissimus</i> | 0 | Camp 1923; Smith (1935); Jullien and Renous-Lécuru (1972,1973); Estes et al. (1988); Avila-Pires (1995) |
| Scincidae | <i>Ophioscincus ophioscincus</i> | 0 | Camp 1923; Smith (1935); Jullien and Renous-Lécuru (1972,1973); Estes et al. (1988); Avila-Pires (1995) |
| Scincidae | <i>Ophioscincus truncatus</i>    | 0 | Camp 1923; Smith (1935); Jullien and Renous-Lécuru (1972,1973); Estes et al. (1988); Avila-Pires (1995) |
| Scincidae | <i>Pamelaescincus gardineri</i>  | 0 | Camp 1923; Smith (1935); Jullien and Renous-Lécuru (1972,1973); Estes et al. (1988); Avila-Pires (1995) |
| Scincidae | <i>Panaspis breviceps</i>        | 0 | Camp 1923; Smith (1935); Jullien and Renous-Lécuru (1972,1973); Estes et al. (1988); Avila-Pires (1995) |
| Scincidae | <i>Panaspis togoensis</i>        | 0 | Camp 1923; Smith (1935); Jullien and Renous-Lécuru (1972,1973); Estes et al. (1988); Avila-Pires (1995) |
| Scincidae | <i>Papuascincus stanleyanus</i>  | 0 | Camp 1923; Smith (1935); Jullien and Renous-Lécuru (1972,1973); Estes et al. (1988); Avila-Pires (1995) |
| Scincidae | <i>Paracontias brocchii</i>      | 0 | Camp 1923; Smith (1935); Jullien and Renous-Lécuru (1972,1973); Estes et al. (1988); Avila-Pires (1995) |
| Scincidae | <i>Paracontias hildebrandti</i>  | 0 | Camp 1923; Smith (1935); Jullien and Renous-Lécuru (1972,1973); Estes et al. (1988); Avila-Pires (1995) |
| Scincidae | <i>Paracontias holomelas</i>     | 0 | Camp 1923; Smith (1935); Jullien and Renous-Lécuru (1972,1973); Estes et al. (1988); Avila-Pires (1995) |
| Scincidae | <i>Paracontias manify</i>        | 0 | Camp 1923; Smith (1935); Jullien and Renous-Lécuru (1972,1973); Estes et al. (1988); Avila-Pires (1995) |
| Scincidae | <i>Paracontias rothschildi</i>   | 0 | Camp 1923; Smith (1935); Jullien and Renous-Lécuru (1972,1973); Estes et al. (1988); Avila-Pires (1995) |
| Scincidae | <i>Parvosincus sisoni</i>        | 0 | Camp 1923; Smith (1935); Jullien and Renous-Lécuru (1972,1973); Estes et al. (1988); Avila-Pires (1995) |
| Scincidae | <i>Phoboscincus garnieri</i>     | 0 | Camp 1923; Smith (1935); Jullien and Renous-Lécuru (1972,1973); Estes et al. (1988); Avila-Pires (1995) |
| Scincidae | <i>Plestiodon anthracinus</i>    | 0 | Camp 1923; Smith (1935); Jullien and Renous-Lécuru (1972,1973); Estes et al. (1988); Avila-Pires (1995) |
| Scincidae | <i>Plestiodon barbouri</i>       | 0 | Camp 1923; Smith (1935); Jullien and Renous-Lécuru (1972,1973); Estes et al. (1988); Avila-Pires (1995) |
| Scincidae | <i>Plestiodon brevirostris</i>   | 0 | Camp 1923; Smith (1935); Jullien and Renous-Lécuru (1972,1973); Estes et al. (1988); Avila-Pires (1995) |
| Scincidae | <i>Plestiodon</i>                | 0 | Camp 1923; Smith (1935); Jullien and Renous-Lécuru                                                      |

|           |                                    |   |                                                                                                         |
|-----------|------------------------------------|---|---------------------------------------------------------------------------------------------------------|
|           | <i>callicephalus</i>               |   | (1972,1973); Estes et al. (1988); Avila-Pires (1995)                                                    |
| Scincidae | <i>Plestiodon capito</i>           | 0 | Camp 1923; Smith (1935); Jullien and Renous-Lécuru (1972,1973); Estes et al. (1988); Avila-Pires (1995) |
| Scincidae | <i>Plestiodon chinensis</i>        | 0 | Camp 1923; Smith (1935); Jullien and Renous-Lécuru (1972,1973); Estes et al. (1988); Avila-Pires (1995) |
| Scincidae | <i>Plestiodon copei</i>            | 0 | Camp 1923; Smith (1935); Jullien and Renous-Lécuru (1972,1973); Estes et al. (1988); Avila-Pires (1995) |
| Scincidae | <i>Plestiodon dugesii</i>          | 0 | Camp 1923; Smith (1935); Jullien and Renous-Lécuru (1972,1973); Estes et al. (1988); Avila-Pires (1995) |
| Scincidae | <i>Plestiodon egregius</i>         | 0 | Camp 1923; Smith (1935); Jullien and Renous-Lécuru (1972,1973); Estes et al. (1988); Avila-Pires (1995) |
| Scincidae | <i>Plestiodon elegans</i>          | 0 | Camp 1923; Smith (1935); Jullien and Renous-Lécuru (1972,1973); Estes et al. (1988); Avila-Pires (1995) |
| Scincidae | <i>Plestiodon fasciatus</i>        | 0 | Camp 1923; Smith (1935); Jullien and Renous-Lécuru (1972,1973); Estes et al. (1988); Avila-Pires (1995) |
| Scincidae | <i>Plestiodon gilberti</i>         | 0 | Camp 1923; Smith (1935); Jullien and Renous-Lécuru (1972,1973); Estes et al. (1988); Avila-Pires (1995) |
| Scincidae | <i>Plestiodon inexpectatus</i>     | 0 | Camp 1923; Smith (1935); Jullien and Renous-Lécuru (1972,1973); Estes et al. (1988); Avila-Pires (1995) |
| Scincidae | <i>Plestiodon japonicus</i>        | 0 | Camp 1923; Smith (1935); Jullien and Renous-Lécuru (1972,1973); Estes et al. (1988); Avila-Pires (1995) |
| Scincidae | <i>Plestiodon kishinouyei</i>      | 0 | Camp 1923; Smith (1935); Jullien and Renous-Lécuru (1972,1973); Estes et al. (1988); Avila-Pires (1995) |
| Scincidae | <i>Plestiodon lagunensis</i>       | 0 | Camp 1923; Smith (1935); Jullien and Renous-Lécuru (1972,1973); Estes et al. (1988); Avila-Pires (1995) |
| Scincidae | <i>Plestiodon laticeps</i>         | 0 | Camp 1923; Smith (1935); Jullien and Renous-Lécuru (1972,1973); Estes et al. (1988); Avila-Pires (1995) |
| Scincidae | <i>Plestiodon latiscutatus</i>     | 0 | Camp 1923; Smith (1935); Jullien and Renous-Lécuru (1972,1973); Estes et al. (1988); Avila-Pires (1995) |
| Scincidae | <i>Plestiodon longirostris</i>     | 0 | Camp 1923; Smith (1935); Jullien and Renous-Lécuru (1972,1973); Estes et al. (1988); Avila-Pires (1995) |
| Scincidae | <i>Plestiodon lynxe</i>            | 0 | Camp 1923; Smith (1935); Jullien and Renous-Lécuru (1972,1973); Estes et al. (1988); Avila-Pires (1995) |
| Scincidae | <i>Plestiodon marginatus</i>       | 0 | Camp 1923; Smith (1935); Jullien and Renous-Lécuru (1972,1973); Estes et al. (1988); Avila-Pires (1995) |
| Scincidae | <i>Plestiodon multivirgatus</i>    | 0 | Camp 1923; Smith (1935); Jullien and Renous-Lécuru (1972,1973); Estes et al. (1988); Avila-Pires (1995) |
| Scincidae | <i>Plestiodon obsoletus</i>        | 0 | Camp 1923; Smith (1935); Jullien and Renous-Lécuru (1972,1973); Estes et al. (1988); Avila-Pires (1995) |
| Scincidae | <i>Plestiodon ochoteranae</i>      | 0 | Camp 1923; Smith (1935); Jullien and Renous-Lécuru (1972,1973); Estes et al. (1988); Avila-Pires (1995) |
| Scincidae | <i>Plestiodon parviauriculatus</i> | 0 | Camp 1923; Smith (1935); Jullien and Renous-Lécuru (1972,1973); Estes et al. (1988); Avila-Pires (1995) |
| Scincidae | <i>Plestiodon parvulus</i>         | 0 | Camp 1923; Smith (1935); Jullien and Renous-Lécuru (1972,1973); Estes et al. (1988); Avila-Pires (1995) |
| Scincidae | <i>Plestiodon quadrilineatus</i>   | 0 | Camp 1923; Smith (1935); Jullien and Renous-Lécuru (1972,1973); Estes et al. (1988); Avila-Pires (1995) |
| Scincidae | <i>Plestiodon reynoldsi</i>        | 0 | Camp 1923; Smith (1935); Jullien and Renous-Lécuru (1972,1973); Estes et al. (1988); Avila-Pires (1995) |
| Scincidae | <i>Plestiodon septentrionalis</i>  | 0 | Camp 1923; Smith (1935); Jullien and Renous-Lécuru (1972,1973); Estes et al. (1988); Avila-Pires (1995) |
| Scincidae | <i>Plestiodon skiltonianus</i>     | 0 | Camp 1923; Smith (1935); Jullien and Renous-Lécuru (1972,1973); Estes et al. (1988); Avila-Pires (1995) |
| Scincidae | <i>Plestiodon stimpsonii</i>       | 0 | Camp 1923; Smith (1935); Jullien and Renous-Lécuru (1972,1973); Estes et al. (1988); Avila-Pires (1995) |
| Scincidae | <i>Plestiodon sumichrasti</i>      | 0 | Camp 1923; Smith (1935); Jullien and Renous-Lécuru (1972,1973); Estes et al. (1988); Avila-Pires (1995) |
| Scincidae | <i>Plestiodon tamdaoensis</i>      | 0 | Camp 1923; Smith (1935); Jullien and Renous-Lécuru (1972,1973); Estes et al. (1988); Avila-Pires (1995) |

|           |                                   |   |                                                                                                         |
|-----------|-----------------------------------|---|---------------------------------------------------------------------------------------------------------|
| Scincidae | <i>Plestiodon tetragrammus</i>    | 0 | Camp 1923; Smith (1935); Jullien and Renous-Lécuru (1972,1973); Estes et al. (1988); Avila-Pires (1995) |
| Scincidae | <i>Plestiodon tunganus</i>        | 0 | Camp 1923; Smith (1935); Jullien and Renous-Lécuru (1972,1973); Estes et al. (1988); Avila-Pires (1995) |
| Scincidae | <i>Prasinohaema virens</i>        | 0 | Camp 1923; Smith (1935); Jullien and Renous-Lécuru (1972,1973); Estes et al. (1988); Avila-Pires (1995) |
| Scincidae | <i>Proablepharus reginae</i>      | 0 | Camp 1923; Smith (1935); Jullien and Renous-Lécuru (1972,1973); Estes et al. (1988); Avila-Pires (1995) |
| Scincidae | <i>Proscelotes eggeli</i>         | 0 | Camp 1923; Smith (1935); Jullien and Renous-Lécuru (1972,1973); Estes et al. (1988); Avila-Pires (1995) |
| Scincidae | <i>Pseudemoia entrecasteauxii</i> | 0 | Camp 1923; Smith (1935); Jullien and Renous-Lécuru (1972,1973); Estes et al. (1988); Avila-Pires (1995) |
| Scincidae | <i>Pseudemoia pagenstecheri</i>   | 0 | Camp 1923; Smith (1935); Jullien and Renous-Lécuru (1972,1973); Estes et al. (1988); Avila-Pires (1995) |
| Scincidae | <i>Pseudoacantias menamainty</i>  | 0 | Camp 1923; Smith (1935); Jullien and Renous-Lécuru (1972,1973); Estes et al. (1988); Avila-Pires (1995) |
| Scincidae | <i>Pygomeles braconnieri</i>      | 0 | Camp 1923; Smith (1935); Jullien and Renous-Lécuru (1972,1973); Estes et al. (1988); Avila-Pires (1995) |
| Scincidae | <i>Ristella rurkii</i>            | 0 | Camp 1923; Smith (1935); Jullien and Renous-Lécuru (1972,1973); Estes et al. (1988); Avila-Pires (1995) |
| Scincidae | <i>Saiphos equalis</i>            | 0 | Camp 1923; Smith (1935); Jullien and Renous-Lécuru (1972,1973); Estes et al. (1988); Avila-Pires (1995) |
| Scincidae | <i>Saproscincus basiliscus</i>    | 0 | Camp 1923; Smith (1935); Jullien and Renous-Lécuru (1972,1973); Estes et al. (1988); Avila-Pires (1995) |
| Scincidae | <i>Saproscincus challengerii</i>  | 0 | Camp 1923; Smith (1935); Jullien and Renous-Lécuru (1972,1973); Estes et al. (1988); Avila-Pires (1995) |
| Scincidae | <i>Saproscincus czechurai</i>     | 0 | Camp 1923; Smith (1935); Jullien and Renous-Lécuru (1972,1973); Estes et al. (1988); Avila-Pires (1995) |
| Scincidae | <i>Saproscincus hannahae</i>      | 0 | Camp 1923; Smith (1935); Jullien and Renous-Lécuru (1972,1973); Estes et al. (1988); Avila-Pires (1995) |
| Scincidae | <i>Saproscincus lewisi</i>        | 0 | Camp 1923; Smith (1935); Jullien and Renous-Lécuru (1972,1973); Estes et al. (1988); Avila-Pires (1995) |
| Scincidae | <i>Saproscincus mustelinus</i>    | 0 | Camp 1923; Smith (1935); Jullien and Renous-Lécuru (1972,1973); Estes et al. (1988); Avila-Pires (1995) |
| Scincidae | <i>Saproscincus oriarius</i>      | 0 | Camp 1923; Smith (1935); Jullien and Renous-Lécuru (1972,1973); Estes et al. (1988); Avila-Pires (1995) |
| Scincidae | <i>Saproscincus rosei</i>         | 0 | Camp 1923; Smith (1935); Jullien and Renous-Lécuru (1972,1973); Estes et al. (1988); Avila-Pires (1995) |
| Scincidae | <i>Saproscincus spectabilis</i>   | 0 | Camp 1923; Smith (1935); Jullien and Renous-Lécuru (1972,1973); Estes et al. (1988); Avila-Pires (1995) |
| Scincidae | <i>Saproscincus tetradactylus</i> | 0 | Camp 1923; Smith (1935); Jullien and Renous-Lécuru (1972,1973); Estes et al. (1988); Avila-Pires (1995) |
| Scincidae | <i>Scelotes anguineus</i>         | 0 | Camp 1923; Smith (1935); Jullien and Renous-Lécuru (1972,1973); Estes et al. (1988); Avila-Pires (1995) |
| Scincidae | <i>Scelotes arenicolus</i>        | 0 | Camp 1923; Smith (1935); Jullien and Renous-Lécuru (1972,1973); Estes et al. (1988); Avila-Pires (1995) |
| Scincidae | <i>Scelotes bipes</i>             | 0 | Camp 1923; Smith (1935); Jullien and Renous-Lécuru (1972,1973); Estes et al. (1988); Avila-Pires (1995) |
| Scincidae | <i>Scelotes caffer</i>            | 0 | Camp 1923; Smith (1935); Jullien and Renous-Lécuru (1972,1973); Estes et al. (1988); Avila-Pires (1995) |
| Scincidae | <i>Scelotes gronovii</i>          | 0 | Camp 1923; Smith (1935); Jullien and Renous-Lécuru (1972,1973); Estes et al. (1988); Avila-Pires (1995) |
| Scincidae | <i>Scelotes kasneri</i>           | 0 | Camp 1923; Smith (1935); Jullien and Renous-Lécuru (1972,1973); Estes et al. (1988); Avila-Pires (1995) |
| Scincidae | <i>Scelotes mirus</i>             | 0 | Camp 1923; Smith (1935); Jullien and Renous-Lécuru (1972,1973); Estes et al. (1988); Avila-Pires (1995) |
| Scincidae | <i>Scelotes montispectus</i>      | 0 | Camp 1923; Smith (1935); Jullien and Renous-Lécuru (1972,1973); Estes et al. (1988); Avila-Pires (1995) |
| Scincidae | <i>Scelotes sexlineatus</i>       | 0 | Camp 1923; Smith (1935); Jullien and Renous-Lécuru                                                      |

|           |                                    |   |                                                                                                         |
|-----------|------------------------------------|---|---------------------------------------------------------------------------------------------------------|
|           |                                    |   | (1972,1973); Estes et al. (1988); Avila-Pires (1995)                                                    |
| Scincidae | <i>Scincella gemmingeri</i>        | 0 | Camp 1923; Smith (1935); Jullien and Renous-Lécuru (1972,1973); Estes et al. (1988); Avila-Pires (1995) |
| Scincidae | <i>Scincella lateralis</i>         | 0 | Camp 1923; Smith (1935); Jullien and Renous-Lécuru (1972,1973); Estes et al. (1988); Avila-Pires (1995) |
| Scincidae | <i>Scincella reevesii</i>          | 0 | Camp 1923; Smith (1935); Jullien and Renous-Lécuru (1972,1973); Estes et al. (1988); Avila-Pires (1995) |
| Scincidae | <i>Scincopus fasciatus</i>         | 0 | Camp 1923; Smith (1935); Jullien and Renous-Lécuru (1972,1973); Estes et al. (1988); Avila-Pires (1995) |
| Scincidae | <i>Scincus mitranus</i>            | 0 | Camp 1923; Smith (1935); Jullien and Renous-Lécuru (1972,1973); Estes et al. (1988); Avila-Pires (1995) |
| Scincidae | <i>Scincus scincus</i>             | 0 | Camp 1923; Smith (1935); Jullien and Renous-Lécuru (1972,1973); Estes et al. (1988); Avila-Pires (1995) |
| Scincidae | <i>Sepsina angolensis</i>          | 0 | Camp 1923; Smith (1935); Jullien and Renous-Lécuru (1972,1973); Estes et al. (1988); Avila-Pires (1995) |
| Scincidae | <i>Sigaloseps deplanchei</i>       | 0 | Camp 1923; Smith (1935); Jullien and Renous-Lécuru (1972,1973); Estes et al. (1988); Avila-Pires (1995) |
| Scincidae | <i>Sigaloseps ruficauda</i>        | 0 | Camp 1923; Smith (1935); Jullien and Renous-Lécuru (1972,1973); Estes et al. (1988); Avila-Pires (1995) |
| Scincidae | <i>Simiscincus aurantiacus</i>     | 0 | Camp 1923; Smith (1935); Jullien and Renous-Lécuru (1972,1973); Estes et al. (1988); Avila-Pires (1995) |
| Scincidae | <i>Sphenomorphus abdictus</i>      | 0 | Camp 1923; Smith (1935); Jullien and Renous-Lécuru (1972,1973); Estes et al. (1988); Avila-Pires (1995) |
| Scincidae | <i>Sphenomorphus acutus</i>        | 0 | Camp 1923; Smith (1935); Jullien and Renous-Lécuru (1972,1973); Estes et al. (1988); Avila-Pires (1995) |
| Scincidae | <i>Sphenomorphus aesculeticola</i> | 0 | Camp 1923; Smith (1935); Jullien and Renous-Lécuru (1972,1973); Estes et al. (1988); Avila-Pires (1995) |
| Scincidae | <i>Sphenomorphus arborens</i>      | 0 | Camp 1923; Smith (1935); Jullien and Renous-Lécuru (1972,1973); Estes et al. (1988); Avila-Pires (1995) |
| Scincidae | <i>Sphenomorphus assatus</i>       | 0 | Camp 1923; Smith (1935); Jullien and Renous-Lécuru (1972,1973); Estes et al. (1988); Avila-Pires (1995) |
| Scincidae | <i>Sphenomorphus atrigularis</i>   | 0 | Camp 1923; Smith (1935); Jullien and Renous-Lécuru (1972,1973); Estes et al. (1988); Avila-Pires (1995) |
| Scincidae | <i>Sphenomorphus beyeri</i>        | 0 | Camp 1923; Smith (1935); Jullien and Renous-Lécuru (1972,1973); Estes et al. (1988); Avila-Pires (1995) |
| Scincidae | <i>Sphenomorphus buenloicus</i>    | 0 | Camp 1923; Smith (1935); Jullien and Renous-Lécuru (1972,1973); Estes et al. (1988); Avila-Pires (1995) |
| Scincidae | <i>Sphenomorphus cherriei</i>      | 0 | Camp 1923; Smith (1935); Jullien and Renous-Lécuru (1972,1973); Estes et al. (1988); Avila-Pires (1995) |
| Scincidae | <i>Sphenomorphus concinnatus</i>   | 0 | Camp 1923; Smith (1935); Jullien and Renous-Lécuru (1972,1973); Estes et al. (1988); Avila-Pires (1995) |
| Scincidae | <i>Sphenomorphus coxi</i>          | 0 | Camp 1923; Smith (1935); Jullien and Renous-Lécuru (1972,1973); Estes et al. (1988); Avila-Pires (1995) |
| Scincidae | <i>Sphenomorphus cranei</i>        | 0 | Camp 1923; Smith (1935); Jullien and Renous-Lécuru (1972,1973); Estes et al. (1988); Avila-Pires (1995) |
| Scincidae | <i>Sphenomorphus cumingi</i>       | 0 | Camp 1923; Smith (1935); Jullien and Renous-Lécuru (1972,1973); Estes et al. (1988); Avila-Pires (1995) |
| Scincidae | <i>Sphenomorphus cyanolaemus</i>   | 0 | Camp 1923; Smith (1935); Jullien and Renous-Lécuru (1972,1973); Estes et al. (1988); Avila-Pires (1995) |
| Scincidae | <i>Sphenomorphus decipiens</i>     | 0 | Camp 1923; Smith (1935); Jullien and Renous-Lécuru (1972,1973); Estes et al. (1988); Avila-Pires (1995) |
| Scincidae | <i>Sphenomorphus diwata</i>        | 0 | Camp 1923; Smith (1935); Jullien and Renous-Lécuru (1972,1973); Estes et al. (1988); Avila-Pires (1995) |
| Scincidae | <i>Sphenomorphus fasciatus</i>     | 0 | Camp 1923; Smith (1935); Jullien and Renous-Lécuru (1972,1973); Estes et al. (1988); Avila-Pires (1995) |
| Scincidae | <i>Sphenomorphus hallieri</i>      | 0 | Camp 1923; Smith (1935); Jullien and Renous-Lécuru (1972,1973); Estes et al. (1988); Avila-Pires (1995) |
| Scincidae | <i>Sphenomorphus indicus</i>       | 0 | Camp 1923; Smith (1935); Jullien and Renous-Lécuru (1972,1973); Estes et al. (1988); Avila-Pires (1995) |

|           |                                      |   |                                                                                                         |
|-----------|--------------------------------------|---|---------------------------------------------------------------------------------------------------------|
| Scincidae | <i>Sphenomorphus jagori</i>          | 0 | Camp 1923; Smith (1935); Jullien and Renous-Lécuru (1972,1973); Estes et al. (1988); Avila-Pires (1995) |
| Scincidae | <i>Sphenomorphus jobiensis</i>       | 0 | Camp 1923; Smith (1935); Jullien and Renous-Lécuru (1972,1973); Estes et al. (1988); Avila-Pires (1995) |
| Scincidae | <i>Sphenomorphus kitangladensis</i>  | 0 | Camp 1923; Smith (1935); Jullien and Renous-Lécuru (1972,1973); Estes et al. (1988); Avila-Pires (1995) |
| Scincidae | <i>Sphenomorphus laterimaculatus</i> | 0 | Camp 1923; Smith (1935); Jullien and Renous-Lécuru (1972,1973); Estes et al. (1988); Avila-Pires (1995) |
| Scincidae | <i>Sphenomorphus lawtoni</i>         | 0 | Camp 1923; Smith (1935); Jullien and Renous-Lécuru (1972,1973); Estes et al. (1988); Avila-Pires (1995) |
| Scincidae | <i>Sphenomorphus leptofasciatus</i>  | 0 | Camp 1923; Smith (1935); Jullien and Renous-Lécuru (1972,1973); Estes et al. (1988); Avila-Pires (1995) |
| Scincidae | <i>Sphenomorphus leucospilos</i>     | 0 | Camp 1923; Smith (1935); Jullien and Renous-Lécuru (1972,1973); Estes et al. (1988); Avila-Pires (1995) |
| Scincidae | <i>Sphenomorphus llanosi</i>         | 0 | Camp 1923; Smith (1935); Jullien and Renous-Lécuru (1972,1973); Estes et al. (1988); Avila-Pires (1995) |
| Scincidae | <i>Sphenomorphus luzonense</i>       | 0 | Camp 1923; Smith (1935); Jullien and Renous-Lécuru (1972,1973); Estes et al. (1988); Avila-Pires (1995) |
| Scincidae | <i>Sphenomorphus maculatus</i>       | 0 | Camp 1923; Smith (1935); Jullien and Renous-Lécuru (1972,1973); Estes et al. (1988); Avila-Pires (1995) |
| Scincidae | <i>Sphenomorphus maindroni</i>       | 0 | Camp 1923; Smith (1935); Jullien and Renous-Lécuru (1972,1973); Estes et al. (1988); Avila-Pires (1995) |
| Scincidae | <i>Sphenomorphus melanopogon</i>     | 0 | Camp 1923; Smith (1935); Jullien and Renous-Lécuru (1972,1973); Estes et al. (1988); Avila-Pires (1995) |
| Scincidae | <i>Sphenomorphus mindanensis</i>     | 0 | Camp 1923; Smith (1935); Jullien and Renous-Lécuru (1972,1973); Estes et al. (1988); Avila-Pires (1995) |
| Scincidae | <i>Sphenomorphus muelleri</i>        | 0 | Camp 1923; Smith (1935); Jullien and Renous-Lécuru (1972,1973); Estes et al. (1988); Avila-Pires (1995) |
| Scincidae | <i>Sphenomorphus multisquamatus</i>  | 0 | Camp 1923; Smith (1935); Jullien and Renous-Lécuru (1972,1973); Estes et al. (1988); Avila-Pires (1995) |
| Scincidae | <i>Sphenomorphus parvus</i>          | 0 | Camp 1923; Smith (1935); Jullien and Renous-Lécuru (1972,1973); Estes et al. (1988); Avila-Pires (1995) |
| Scincidae | <i>Sphenomorphus praesignis</i>      | 0 | Camp 1923; Smith (1935); Jullien and Renous-Lécuru (1972,1973); Estes et al. (1988); Avila-Pires (1995) |
| Scincidae | <i>Sphenomorphus sabanus</i>         | 0 | Camp 1923; Smith (1935); Jullien and Renous-Lécuru (1972,1973); Estes et al. (1988); Avila-Pires (1995) |
| Scincidae | <i>Sphenomorphus scutatus</i>        | 0 | Camp 1923; Smith (1935); Jullien and Renous-Lécuru (1972,1973); Estes et al. (1988); Avila-Pires (1995) |
| Scincidae | <i>Sphenomorphus simus</i>           | 0 | Camp 1923; Smith (1935); Jullien and Renous-Lécuru (1972,1973); Estes et al. (1988); Avila-Pires (1995) |
| Scincidae | <i>Sphenomorphus solomonis</i>       | 0 | Camp 1923; Smith (1935); Jullien and Renous-Lécuru (1972,1973); Estes et al. (1988); Avila-Pires (1995) |
| Scincidae | <i>Sphenomorphus steerei</i>         | 0 | Camp 1923; Smith (1935); Jullien and Renous-Lécuru (1972,1973); Estes et al. (1988); Avila-Pires (1995) |
| Scincidae | <i>Sphenomorphus stellatus</i>       | 0 | Camp 1923; Smith (1935); Jullien and Renous-Lécuru (1972,1973); Estes et al. (1988); Avila-Pires (1995) |
| Scincidae | <i>Sphenomorphus tagapayo</i>        | 0 | Camp 1923; Smith (1935); Jullien and Renous-Lécuru (1972,1973); Estes et al. (1988); Avila-Pires (1995) |
| Scincidae | <i>Sphenomorphus variegatus</i>      | 0 | Camp 1923; Smith (1935); Jullien and Renous-Lécuru (1972,1973); Estes et al. (1988); Avila-Pires (1995) |
| Scincidae | <i>Sphenomorphus victoria</i>        | 0 | Camp 1923; Smith (1935); Jullien and Renous-Lécuru (1972,1973); Estes et al. (1988); Avila-Pires (1995) |
| Scincidae | <i>Sphenomorphus wrighti</i>         | 0 | Camp 1923; Smith (1935); Jullien and Renous-Lécuru (1972,1973); Estes et al. (1988); Avila-Pires (1995) |
| Scincidae | <i>Tiliqua adelaidensis</i>          | 0 | Camp 1923; Smith (1935); Jullien and Renous-Lécuru (1972,1973); Estes et al. (1988); Avila-Pires (1995) |
| Scincidae | <i>Tiliqua gigas</i>                 | 0 | Camp 1923; Smith (1935); Jullien and Renous-Lécuru (1972,1973); Estes et al. (1988); Avila-Pires (1995) |
| Scincidae | <i>Tiliqua nigrolutea</i>            | 0 | Camp 1923; Smith (1935); Jullien and Renous-Lécuru (1972,1973); Estes et al. (1988); Avila-Pires (1995) |

|           |                                     |   |                                                                                                         |
|-----------|-------------------------------------|---|---------------------------------------------------------------------------------------------------------|
|           |                                     |   | (1972,1973); Estes et al. (1988); Avila-Pires (1995)                                                    |
| Scincidae | <i>Tiliqua occipitalis</i>          | 0 | Camp 1923; Smith (1935); Jullien and Renous-Lécuru (1972,1973); Estes et al. (1988); Avila-Pires (1995) |
| Scincidae | <i>Tiliqua rugosa</i>               | 0 | Camp 1923; Smith (1935); Jullien and Renous-Lécuru (1972,1973); Estes et al. (1988); Avila-Pires (1995) |
| Scincidae | <i>Tiliqua scincoides</i>           | 0 | Camp 1923; Smith (1935); Jullien and Renous-Lécuru (1972,1973); Estes et al. (1988); Avila-Pires (1995) |
| Scincidae | <i>Trachylepis acutilabris</i>      | 0 | Camp 1923; Smith (1935); Jullien and Renous-Lécuru (1972,1973); Estes et al. (1988); Avila-Pires (1995) |
| Scincidae | <i>Trachylepis affinis</i>          | 0 | Camp 1923; Smith (1935); Jullien and Renous-Lécuru (1972,1973); Estes et al. (1988); Avila-Pires (1995) |
| Scincidae | <i>Trachylepis atlantica</i>        | 0 | Camp 1923; Smith (1935); Jullien and Renous-Lécuru (1972,1973); Estes et al. (1988); Avila-Pires (1995) |
| Scincidae | <i>Trachylepis aurata</i>           | 0 | Camp 1923; Smith (1935); Jullien and Renous-Lécuru (1972,1973); Estes et al. (1988); Avila-Pires (1995) |
| Scincidae | <i>Trachylepis aureopunctata</i>    | 0 | Camp 1923; Smith (1935); Jullien and Renous-Lécuru (1972,1973); Estes et al. (1988); Avila-Pires (1995) |
| Scincidae | <i>Trachylepis boettgeri</i>        | 0 | Camp 1923; Smith (1935); Jullien and Renous-Lécuru (1972,1973); Estes et al. (1988); Avila-Pires (1995) |
| Scincidae | <i>Trachylepis brevicollis</i>      | 0 | Camp 1923; Smith (1935); Jullien and Renous-Lécuru (1972,1973); Estes et al. (1988); Avila-Pires (1995) |
| Scincidae | <i>Trachylepis capensis</i>         | 0 | Camp 1923; Smith (1935); Jullien and Renous-Lécuru (1972,1973); Estes et al. (1988); Avila-Pires (1995) |
| Scincidae | <i>Trachylepis dumasi</i>           | 0 | Camp 1923; Smith (1935); Jullien and Renous-Lécuru (1972,1973); Estes et al. (1988); Avila-Pires (1995) |
| Scincidae | <i>Trachylepis elegans</i>          | 0 | Camp 1923; Smith (1935); Jullien and Renous-Lécuru (1972,1973); Estes et al. (1988); Avila-Pires (1995) |
| Scincidae | <i>Trachylepis gravenhorstii</i>    | 0 | Camp 1923; Smith (1935); Jullien and Renous-Lécuru (1972,1973); Estes et al. (1988); Avila-Pires (1995) |
| Scincidae | <i>Trachylepis hoeschi</i>          | 0 | Camp 1923; Smith (1935); Jullien and Renous-Lécuru (1972,1973); Estes et al. (1988); Avila-Pires (1995) |
| Scincidae | <i>Trachylepis homalocephala</i>    | 0 | Camp 1923; Smith (1935); Jullien and Renous-Lécuru (1972,1973); Estes et al. (1988); Avila-Pires (1995) |
| Scincidae | <i>Trachylepis maculilabris</i>     | 0 | Camp 1923; Smith (1935); Jullien and Renous-Lécuru (1972,1973); Estes et al. (1988); Avila-Pires (1995) |
| Scincidae | <i>Trachylepis madagascariensis</i> | 0 | Camp 1923; Smith (1935); Jullien and Renous-Lécuru (1972,1973); Estes et al. (1988); Avila-Pires (1995) |
| Scincidae | <i>Trachylepis margaritifera</i>    | 0 | Camp 1923; Smith (1935); Jullien and Renous-Lécuru (1972,1973); Estes et al. (1988); Avila-Pires (1995) |
| Scincidae | <i>Trachylepis occidentalis</i>     | 0 | Camp 1923; Smith (1935); Jullien and Renous-Lécuru (1972,1973); Estes et al. (1988); Avila-Pires (1995) |
| Scincidae | <i>Trachylepis perrotetii</i>       | 0 | Camp 1923; Smith (1935); Jullien and Renous-Lécuru (1972,1973); Estes et al. (1988); Avila-Pires (1995) |
| Scincidae | <i>Trachylepis quinquetaeniata</i>  | 0 | Camp 1923; Smith (1935); Jullien and Renous-Lécuru (1972,1973); Estes et al. (1988); Avila-Pires (1995) |
| Scincidae | <i>Trachylepis seychellensis</i>    | 0 | Camp 1923; Smith (1935); Jullien and Renous-Lécuru (1972,1973); Estes et al. (1988); Avila-Pires (1995) |
| Scincidae | <i>Trachylepis socotrana</i>        | 0 | Camp 1923; Smith (1935); Jullien and Renous-Lécuru (1972,1973); Estes et al. (1988); Avila-Pires (1995) |
| Scincidae | <i>Trachylepis spilogaster</i>      | 0 | Camp 1923; Smith (1935); Jullien and Renous-Lécuru (1972,1973); Estes et al. (1988); Avila-Pires (1995) |
| Scincidae | <i>Trachylepis striata</i>          | 0 | Camp 1923; Smith (1935); Jullien and Renous-Lécuru (1972,1973); Estes et al. (1988); Avila-Pires (1995) |
| Scincidae | <i>Trachylepis sulcata</i>          | 0 | Camp 1923; Smith (1935); Jullien and Renous-Lécuru (1972,1973); Estes et al. (1988); Avila-Pires (1995) |
| Scincidae | <i>Trachylepis varia</i>            | 0 | Camp 1923; Smith (1935); Jullien and Renous-Lécuru (1972,1973); Estes et al. (1988); Avila-Pires (1995) |
| Scincidae | <i>Trachylepis variegata</i>        | 0 | Camp 1923; Smith (1935); Jullien and Renous-Lécuru (1972,1973); Estes et al. (1988); Avila-Pires (1995) |



|           |                                     |   |                                                                                                         |
|-----------|-------------------------------------|---|---------------------------------------------------------------------------------------------------------|
| Scincidae | <i>Trachylepis vato</i>             | 0 | Camp 1923; Smith (1935); Jullien and Renous-Lécure (1972,1973); Estes et al. (1988); Avila-Pires (1995) |
| Scincidae | <i>Trachylepis vittata</i>          | 0 | Camp 1923; Smith (1935); Jullien and Renous-Lécure (1972,1973); Estes et al. (1988); Avila-Pires (1995) |
| Scincidae | <i>Trachylepis wrightii</i>         | 0 | Camp 1923; Smith (1935); Jullien and Renous-Lécure (1972,1973); Estes et al. (1988); Avila-Pires (1995) |
| Scincidae | <i>Tribolonotus blanchardi</i>      | 0 | Camp 1923; Smith (1935); Jullien and Renous-Lécure (1972,1973); Estes et al. (1988); Avila-Pires (1995) |
| Scincidae | <i>Tribolonotus brongersmai</i>     | 0 | Camp 1923; Smith (1935); Jullien and Renous-Lécure (1972,1973); Estes et al. (1988); Avila-Pires (1995) |
| Scincidae | <i>Tribolonotus gracilis</i>        | 0 | Camp 1923; Smith (1935); Jullien and Renous-Lécure (1972,1973); Estes et al. (1988); Avila-Pires (1995) |
| Scincidae | <i>Tribolonotus novaeguineae</i>    | 0 | Camp 1923; Smith (1935); Jullien and Renous-Lécure (1972,1973); Estes et al. (1988); Avila-Pires (1995) |
| Scincidae | <i>Tribolonotus ponceleti</i>       | 0 | Camp 1923; Smith (1935); Jullien and Renous-Lécure (1972,1973); Estes et al. (1988); Avila-Pires (1995) |
| Scincidae | <i>Tribolonotus pseudoponceleti</i> | 0 | Camp 1923; Smith (1935); Jullien and Renous-Lécure (1972,1973); Estes et al. (1988); Avila-Pires (1995) |
| Scincidae | <i>Tribolonotus schmidtii</i>       | 0 | Camp 1923; Smith (1935); Jullien and Renous-Lécure (1972,1973); Estes et al. (1988); Avila-Pires (1995) |
| Scincidae | <i>Tropidophorus baconi</i>         | 0 | Camp 1923; Smith (1935); Jullien and Renous-Lécure (1972,1973); Estes et al. (1988); Avila-Pires (1995) |
| Scincidae | <i>Tropidophorus baviensis</i>      | 0 | Camp 1923; Smith (1935); Jullien and Renous-Lécure (1972,1973); Estes et al. (1988); Avila-Pires (1995) |
| Scincidae | <i>Tropidophorus beccarii</i>       | 0 | Camp 1923; Smith (1935); Jullien and Renous-Lécure (1972,1973); Estes et al. (1988); Avila-Pires (1995) |
| Scincidae | <i>Tropidophorus berdmorei</i>      | 0 | Camp 1923; Smith (1935); Jullien and Renous-Lécure (1972,1973); Estes et al. (1988); Avila-Pires (1995) |
| Scincidae | <i>Tropidophorus brookei</i>        | 0 | Camp 1923; Smith (1935); Jullien and Renous-Lécure (1972,1973); Estes et al. (1988); Avila-Pires (1995) |
| Scincidae | <i>Tropidophorus cocincinensis</i>  | 0 | Camp 1923; Smith (1935); Jullien and Renous-Lécure (1972,1973); Estes et al. (1988); Avila-Pires (1995) |
| Scincidae | <i>Tropidophorus grayi</i>          | 0 | Camp 1923; Smith (1935); Jullien and Renous-Lécure (1972,1973); Estes et al. (1988); Avila-Pires (1995) |
| Scincidae | <i>Tropidophorus hainanus</i>       | 0 | Camp 1923; Smith (1935); Jullien and Renous-Lécure (1972,1973); Estes et al. (1988); Avila-Pires (1995) |
| Scincidae | <i>Tropidophorus latiscutatus</i>   | 0 | Camp 1923; Smith (1935); Jullien and Renous-Lécure (1972,1973); Estes et al. (1988); Avila-Pires (1995) |
| Scincidae | <i>Tropidophorus matsuii</i>        | 0 | Camp 1923; Smith (1935); Jullien and Renous-Lécure (1972,1973); Estes et al. (1988); Avila-Pires (1995) |
| Scincidae | <i>Tropidophorus microlepis</i>     | 0 | Camp 1923; Smith (1935); Jullien and Renous-Lécure (1972,1973); Estes et al. (1988); Avila-Pires (1995) |
| Scincidae | <i>Tropidophorus misaminius</i>     | 0 | Camp 1923; Smith (1935); Jullien and Renous-Lécure (1972,1973); Estes et al. (1988); Avila-Pires (1995) |
| Scincidae | <i>Tropidophorus murphyi</i>        | 0 | Camp 1923; Smith (1935); Jullien and Renous-Lécure (1972,1973); Estes et al. (1988); Avila-Pires (1995) |
| Scincidae | <i>Tropidophorus noggei</i>         | 0 | Camp 1923; Smith (1935); Jullien and Renous-Lécure (1972,1973); Estes et al. (1988); Avila-Pires (1995) |
| Scincidae | <i>Tropidophorus partelloi</i>      | 0 | Camp 1923; Smith (1935); Jullien and Renous-Lécure (1972,1973); Estes et al. (1988); Avila-Pires (1995) |
| Scincidae | <i>Tropidophorus robinsoni</i>      | 0 | Camp 1923; Smith (1935); Jullien and Renous-Lécure (1972,1973); Estes et al. (1988); Avila-Pires (1995) |
| Scincidae | <i>Tropidophorus sinicus</i>        | 0 | Camp 1923; Smith (1935); Jullien and Renous-Lécure (1972,1973); Estes et al. (1988); Avila-Pires (1995) |
| Scincidae | <i>Tropidophorus thai</i>           | 0 | Camp 1923; Smith (1935); Jullien and Renous-Lécure (1972,1973); Estes et al. (1988); Avila-Pires (1995) |
| Scincidae | <i>Tropidoscincus aubrianus</i>     | 0 | Camp 1923; Smith (1935); Jullien and Renous-Lécure (1972,1973); Estes et al. (1988); Avila-Pires (1995) |
| Scincidae | <i>Tropidoscincus</i>               | 0 | Camp 1923; Smith (1935); Jullien and Renous-Lécure                                                      |

|                   |                                      |   |                                                                                                         |
|-------------------|--------------------------------------|---|---------------------------------------------------------------------------------------------------------|
|                   | <i>boreus</i>                        |   | (1972,1973); Estes et al. (1988); Avila-Pires (1995)                                                    |
| Scincidae         | <i>Tropidoscincus variabilis</i>     | 0 | Camp 1923; Smith (1935); Jullien and Renous-Lécuru (1972,1973); Estes et al. (1988); Avila-Pires (1995) |
| Scincidae         | <i>Typhlacontias brevipes</i>        | 0 | Camp 1923; Smith (1935); Jullien and Renous-Lécuru (1972,1973); Estes et al. (1988); Avila-Pires (1995) |
| Scincidae         | <i>Typhlacontias punctatissimus</i>  | 0 | Camp 1923; Smith (1935); Jullien and Renous-Lécuru (1972,1973); Estes et al. (1988); Avila-Pires (1995) |
| Scincidae         | <i>Typhlosaurus braini</i>           | 0 | Camp 1923; Smith (1935); Jullien and Renous-Lécuru (1972,1973); Estes et al. (1988); Avila-Pires (1995) |
| Scincidae         | <i>Typhlosaurus caecus</i>           | 0 | Camp 1923; Smith (1935); Jullien and Renous-Lécuru (1972,1973); Estes et al. (1988); Avila-Pires (1995) |
| Scincidae         | <i>Typhlosaurus gariensis</i>        | 0 | Camp 1923; Smith (1935); Jullien and Renous-Lécuru (1972,1973); Estes et al. (1988); Avila-Pires (1995) |
| Scincidae         | <i>Typhlosaurus lineatus</i>         | 0 | Camp 1923; Smith (1935); Jullien and Renous-Lécuru (1972,1973); Estes et al. (1988); Avila-Pires (1995) |
| Scincidae         | <i>Typhlosaurus lomiae</i>           | 0 | Camp 1923; Smith (1935); Jullien and Renous-Lécuru (1972,1973); Estes et al. (1988); Avila-Pires (1995) |
| Scincidae         | <i>Typhlosaurus meyeri</i>           | 0 | Camp 1923; Smith (1935); Jullien and Renous-Lécuru (1972,1973); Estes et al. (1988); Avila-Pires (1995) |
| Scincidae         | <i>Typhlosaurus vermis</i>           | 0 | Camp 1923; Smith (1935); Jullien and Renous-Lécuru (1972,1973); Estes et al. (1988); Avila-Pires (1995) |
| Scincidae         | <i>Voeltzkowia fierinensis</i>       | 0 | Camp 1923; Smith (1935); Jullien and Renous-Lécuru (1972,1973); Estes et al. (1988); Avila-Pires (1995) |
| Scincidae         | <i>Voeltzkowia lineata</i>           | 0 | Camp 1923; Smith (1935); Jullien and Renous-Lécuru (1972,1973); Estes et al. (1988); Avila-Pires (1995) |
| Scincidae         | <i>Voeltzkowia rubrocaudata</i>      | 0 | Camp 1923; Smith (1935); Jullien and Renous-Lécuru (1972,1973); Estes et al. (1988); Avila-Pires (1995) |
| Shinisauridae     | <i>Shinisaurus crocodilurus</i>      | 1 | Zhao et al. (1999)                                                                                      |
| Sphaerodactylidae | <i>Aristelliger georgeensis</i>      | 0 | Kluge and Nussbaum (1995)                                                                               |
| Sphaerodactylidae | <i>Aristelliger lar</i>              | 0 | Kluge and Nussbaum (1995)                                                                               |
| Sphaerodactylidae | <i>Aristelliger praesignis</i>       | 0 | Kluge and Nussbaum (1995)                                                                               |
| Sphaerodactylidae | <i>Coleodactylus amazonicus</i>      | 0 | Kluge and Nussbaum (1995)                                                                               |
| Sphaerodactylidae | <i>Coleodactylus brachystoma</i>     | 0 | Kluge and Nussbaum (1995)                                                                               |
| Sphaerodactylidae | <i>Coleodactylus meridionalis</i>    | 0 | Kluge and Nussbaum (1995)                                                                               |
| Sphaerodactylidae | <i>Coleodactylus natalensis</i>      | 0 | Kluge and Nussbaum (1995)                                                                               |
| Sphaerodactylidae | <i>Coleodactylus septentrionalis</i> | 0 | Kluge and Nussbaum (1995)                                                                               |
| Sphaerodactylidae | <i>Euleptes europaea</i>             | 0 | Boulenger (1885)                                                                                        |
| Sphaerodactylidae | <i>Gonatodes albogularis</i>         | 0 | Kluge and Nussbaum (1995)                                                                               |
| Sphaerodactylidae | <i>Gonatodes alexandermendesi</i>    | 0 | Kluge and Nussbaum (1995)                                                                               |
| Sphaerodactylidae | <i>Gonatodes annularis</i>           | 0 | Kluge and Nussbaum (1995)                                                                               |
| Sphaerodactylidae | <i>Gonatodes antillensis</i>         | 0 | Kluge and Nussbaum (1995)                                                                               |
| Sphaerodactylidae | <i>Gonatodes caudiscutatus</i>       | 0 | Avila-Pires (1995); Kluge and Nussbaum (1995)                                                           |
| Sphaerodactylidae | <i>Gonatodes ceciliae</i>            | 0 | Kluge and Nussbaum (1995)                                                                               |
| Sphaerodactylidae | <i>Gonatodes concinnatus</i>         | 0 | Kluge and Nussbaum (1995)                                                                               |

|                   |                                      |   |                                                           |
|-------------------|--------------------------------------|---|-----------------------------------------------------------|
| Sphaerodactylidae | <i>Gonatodes daudini</i>             | 0 | Kluge and Nussbaum (1995)                                 |
| Sphaerodactylidae | <i>Gonatodes eladioi</i>             | 0 | Kluge and Nussbaum (1995)                                 |
| Sphaerodactylidae | <i>Gonatodes falconensis</i>         | 0 | Kluge and Nussbaum (1995)                                 |
| Sphaerodactylidae | <i>Gonatodes hasemani</i>            | 0 | Kluge and Nussbaum (1995)                                 |
| Sphaerodactylidae | <i>Gonatodes humeralis</i>           | 0 | Kluge and Nussbaum (1995)                                 |
| Sphaerodactylidae | <i>Gonatodes infernalis</i>          | 0 | Kluge and Nussbaum (1995)                                 |
| Sphaerodactylidae | <i>Gonatodes ocellatus</i>           | 0 | Kluge and Nussbaum (1995)                                 |
| Sphaerodactylidae | <i>Gonatodes petersi</i>             | 0 | Kluge and Nussbaum (1995)                                 |
| Sphaerodactylidae | <i>Gonatodes purpurogularis</i>      | 0 | Kluge and Nussbaum (1995)                                 |
| Sphaerodactylidae | <i>Gonatodes seigliei</i>            | 0 | Kluge and Nussbaum (1995)                                 |
| Sphaerodactylidae | <i>Gonatodes superciliaris</i>       | 0 | Kluge and Nussbaum (1995)                                 |
| Sphaerodactylidae | <i>Gonatodes taniae</i>              | 0 | Kluge and Nussbaum (1995)                                 |
| Sphaerodactylidae | <i>Gonatodes vittatus</i>            | 0 | Kluge and Nussbaum (1995)                                 |
| Sphaerodactylidae | <i>Lepidoblepharis festae</i>        | 0 | Kluge and Nussbaum (1995)                                 |
| Sphaerodactylidae | <i>Lepidoblepharis xanthostigma</i>  | 0 | Kluge and Nussbaum (1995)                                 |
| Sphaerodactylidae | <i>Pristurus abdelkuri</i>           | 0 | Smith (1935); Loveridge (1947); Kluge and Nussbaum (1995) |
| Sphaerodactylidae | <i>Pristurus carteri</i>             | 0 | Smith (1935); Loveridge (1947); Kluge and Nussbaum (1995) |
| Sphaerodactylidae | <i>Pristurus celerrimus</i>          | 0 | Smith (1935); Loveridge (1947); Kluge and Nussbaum (1995) |
| Sphaerodactylidae | <i>Pristurus crucifer</i>            | 0 | Smith (1935); Loveridge (1947); Kluge and Nussbaum (1995) |
| Sphaerodactylidae | <i>Pristurus flavipunctatus</i>      | 0 | Smith (1935); Loveridge (1947); Kluge and Nussbaum (1995) |
| Sphaerodactylidae | <i>Pristurus guichardi</i>           | 0 | Smith (1935); Loveridge (1947); Kluge and Nussbaum (1995) |
| Sphaerodactylidae | <i>Pristurus insignis</i>            | 0 | Smith (1935); Loveridge (1947); Kluge and Nussbaum (1995) |
| Sphaerodactylidae | <i>Pristurus minimus</i>             | 0 | Smith (1935); Loveridge (1947); Kluge and Nussbaum (1995) |
| Sphaerodactylidae | <i>Pristurus rupestris</i>           | 0 | Smith (1935); Loveridge (1947); Kluge and Nussbaum (1995) |
| Sphaerodactylidae | <i>Pristurus sokotranus</i>          | 0 | Smith (1935); Loveridge (1947); Kluge and Nussbaum (1995) |
| Sphaerodactylidae | <i>Pristurus somalicus</i>           | 0 | Smith (1935); Loveridge (1947); Kluge and Nussbaum (1995) |
| Sphaerodactylidae | <i>Pseudogonatodes guianensis</i>    | 0 | Kluge and Nussbaum (1995)                                 |
| Sphaerodactylidae | <i>Pseudogonatodes lunulatus</i>     | 0 | Kluge and Nussbaum (1995)                                 |
| Sphaerodactylidae | <i>Pseudogonatodes manessi</i>       | 0 | Kluge and Nussbaum (1995)                                 |
| Sphaerodactylidae | <i>Quedenfeldtia moerens</i>         | 0 | Loveridge (1947); Kluge and Nussbaum (1995)               |
| Sphaerodactylidae | <i>Quedenfeldtia trachyblepharus</i> | 0 | Loveridge (1947); Kluge and Nussbaum (1995)               |
| Sphaerodactylidae | <i>Saurodactylus fasciatus</i>       | 0 | Kluge and Nussbaum (1995)                                 |

|                   |                                       |   |                           |
|-------------------|---------------------------------------|---|---------------------------|
| Sphaerodactylidae | <i>Saurodactylus mauritanicus</i>     | 0 | Kluge and Nussbaum (1995) |
| Sphaerodactylidae | <i>Sphaerodactylus altavelensis</i>   | 0 | Kluge and Nussbaum (1995) |
| Sphaerodactylidae | <i>Sphaerodactylus argus</i>          | 0 | Kluge and Nussbaum (1995) |
| Sphaerodactylidae | <i>Sphaerodactylus armstrongi</i>     | 0 | Kluge and Nussbaum (1995) |
| Sphaerodactylidae | <i>Sphaerodactylus cinereus</i>       | 0 | Kluge and Nussbaum (1995) |
| Sphaerodactylidae | <i>Sphaerodactylus copei</i>          | 0 | Kluge and Nussbaum (1995) |
| Sphaerodactylidae | <i>Sphaerodactylus cricoderus</i>     | 0 | Kluge and Nussbaum (1995) |
| Sphaerodactylidae | <i>Sphaerodactylus cryphius</i>       | 0 | Kluge and Nussbaum (1995) |
| Sphaerodactylidae | <i>Sphaerodactylus darlingtoni</i>    | 0 | Kluge and Nussbaum (1995) |
| Sphaerodactylidae | <i>Sphaerodactylus elegans</i>        | 0 | Kluge and Nussbaum (1995) |
| Sphaerodactylidae | <i>Sphaerodactylus elegantulus</i>    | 0 | Kluge and Nussbaum (1995) |
| Sphaerodactylidae | <i>Sphaerodactylus fantasticus</i>    | 0 | Kluge and Nussbaum (1995) |
| Sphaerodactylidae | <i>Sphaerodactylus gaigeae</i>        | 0 | Kluge and Nussbaum (1995) |
| Sphaerodactylidae | <i>Sphaerodactylus glaucus</i>        | 0 | Kluge and Nussbaum (1995) |
| Sphaerodactylidae | <i>Sphaerodactylus goniorhynchus</i>  | 0 | Kluge and Nussbaum (1995) |
| Sphaerodactylidae | <i>Sphaerodactylus intermedius</i>    | 0 | Kluge and Nussbaum (1995) |
| Sphaerodactylidae | <i>Sphaerodactylus kirbyi</i>         | 0 | Kluge and Nussbaum (1995) |
| Sphaerodactylidae | <i>Sphaerodactylus klauberi</i>       | 0 | Kluge and Nussbaum (1995) |
| Sphaerodactylidae | <i>Sphaerodactylus leucaster</i>      | 0 | Kluge and Nussbaum (1995) |
| Sphaerodactylidae | <i>Sphaerodactylus macrolepis</i>     | 0 | Kluge and Nussbaum (1995) |
| Sphaerodactylidae | <i>Sphaerodactylus microlepis</i>     | 0 | Kluge and Nussbaum (1995) |
| Sphaerodactylidae | <i>Sphaerodactylus molei</i>          | 0 | Kluge and Nussbaum (1995) |
| Sphaerodactylidae | <i>Sphaerodactylus nicholsi</i>       | 0 | Kluge and Nussbaum (1995) |
| Sphaerodactylidae | <i>Sphaerodactylus nigropunctatus</i> | 0 | Kluge and Nussbaum (1995) |
| Sphaerodactylidae | <i>Sphaerodactylus notatus</i>        | 0 | Kluge and Nussbaum (1995) |
| Sphaerodactylidae | <i>Sphaerodactylus ocoae</i>          | 0 | Kluge and Nussbaum (1995) |
| Sphaerodactylidae | <i>Sphaerodactylus oliveri</i>        | 0 | Kluge and Nussbaum (1995) |
| Sphaerodactylidae | <i>Sphaerodactylus parvus</i>         | 0 | Kluge and Nussbaum (1995) |
| Sphaerodactylidae | <i>Sphaerodactylus ramsdeni</i>       | 0 | Kluge and Nussbaum (1995) |
| Sphaerodactylidae | <i>Sphaerodactylus</i>                | 0 | Kluge and Nussbaum (1995) |

|                   |                                   |   |                                                                 |
|-------------------|-----------------------------------|---|-----------------------------------------------------------------|
|                   | <i>richardi</i>                   |   |                                                                 |
| Sphaerodactylidae | <i>Sphaerodactylus roosevelti</i> | 0 | Kluge and Nussbaum (1995)                                       |
| Sphaerodactylidae | <i>Sphaerodactylus sabanus</i>    | 0 | Kluge and Nussbaum (1995)                                       |
| Sphaerodactylidae | <i>Sphaerodactylus schwartzi</i>  | 0 | Kluge and Nussbaum (1995)                                       |
| Sphaerodactylidae | <i>Sphaerodactylus semasiops</i>  | 0 | Kluge and Nussbaum (1995)                                       |
| Sphaerodactylidae | <i>Sphaerodactylus shrevei</i>    | 0 | Kluge and Nussbaum (1995)                                       |
| Sphaerodactylidae | <i>Sphaerodactylus sputator</i>   | 0 | Kluge and Nussbaum (1995)                                       |
| Sphaerodactylidae | <i>Sphaerodactylus thompsoni</i>  | 0 | Kluge and Nussbaum (1995)                                       |
| Sphaerodactylidae | <i>Sphaerodactylus torrei</i>     | 0 | Kluge and Nussbaum (1995)                                       |
| Sphaerodactylidae | <i>Sphaerodactylus townsendi</i>  | 0 | Kluge and Nussbaum (1995)                                       |
| Sphaerodactylidae | <i>Sphaerodactylus vincenti</i>   | 0 | Kluge and Nussbaum (1995)                                       |
| Sphaerodactylidae | <i>Teratoscincus microlepis</i>   | 0 | Smith (1935); Kluge and Nussbaum (1995); Ananjeva et al. (2006) |
| Sphaerodactylidae | <i>Teratoscincus przewalskii</i>  | 0 | Smith (1935); Kluge and Nussbaum (1995); Ananjeva et al. (2006) |
| Sphaerodactylidae | <i>Teratoscincus roborowskii</i>  | 0 | Smith (1935); Kluge and Nussbaum (1995); Ananjeva et al. (2006) |
| Sphaerodactylidae | <i>Teratoscincus scincus</i>      | 0 | Smith (1935); Kluge and Nussbaum (1995); Ananjeva et al. (2006) |
| Sphenodontidae    | <i>Sphenodon punctatus</i>        | 0 | Flachsbarth et al. (2009)                                       |
| Teiidae           | <i>Ameiva ameiva</i>              | 1 | Avila-Pires (1995); Harvey et al. (2012)                        |
| Teiidae           | <i>Ameiva auberi</i>              | 1 | Avila-Pires (1995); Harvey et al. (2012)                        |
| Teiidae           | <i>Ameiva bifrontata</i>          | 1 | Avila-Pires (1995); Harvey et al. (2012)                        |
| Teiidae           | <i>Ameiva chrysolaema</i>         | 1 | Avila-Pires (1995); Harvey et al. (2012)                        |
| Teiidae           | <i>Ameiva corax</i>               | 1 | Avila-Pires (1995); Harvey et al. (2012)                        |
| Teiidae           | <i>Ameiva dorsalis</i>            | 1 | Avila-Pires (1995); Harvey et al. (2012)                        |
| Teiidae           | <i>Ameiva erythrocephala</i>      | 1 | Avila-Pires (1995); Harvey et al. (2012)                        |
| Teiidae           | <i>Ameiva exsul</i>               | 1 | Avila-Pires (1995); Harvey et al. (2012)                        |
| Teiidae           | <i>Ameiva festiva</i>             | 1 | Avila-Pires (1995); Harvey et al. (2012)                        |
| Teiidae           | <i>Ameiva fuscata</i>             | 1 | Avila-Pires (1995); Harvey et al. (2012)                        |
| Teiidae           | <i>Ameiva griseivittata</i>       | 1 | Avila-Pires (1995); Harvey et al. (2012)                        |
| Teiidae           | <i>Ameiva leberi</i>              | 1 | Avila-Pires (1995); Harvey et al. (2012)                        |
| Teiidae           | <i>Ameiva lineolata</i>           | 1 | Avila-Pires (1995); Harvey et al. (2012)                        |
| Teiidae           | <i>Ameiva maynardi</i>            | 1 | Avila-Pires (1995); Harvey et al. (2012)                        |
| Teiidae           | <i>Ameiva plei</i>                | 1 | Avila-Pires (1995); Harvey et al. (2012)                        |
| Teiidae           | <i>Ameiva pluvianotata</i>        | 1 | Avila-Pires (1995); Harvey et al. (2012)                        |
| Teiidae           | <i>Ameiva polops</i>              | 1 | Avila-Pires (1995); Harvey et al. (2012)                        |
| Teiidae           | <i>Ameiva quadrilineata</i>       | 1 | Avila-Pires (1995); Harvey et al. (2012)                        |
| Teiidae           | <i>Ameiva taeniura</i>            | 1 | Avila-Pires (1995); Harvey et al. (2012)                        |

|         |                                    |   |                                                                       |
|---------|------------------------------------|---|-----------------------------------------------------------------------|
| Teiidae | <i>Ameiva undulata</i>             | 1 | Avila-Pires (1995); Harvey et al. (2012)                              |
| Teiidae | <i>Ameiva wetmorei</i>             | 1 | Avila-Pires (1995); Harvey et al. (2012)                              |
| Teiidae | <i>Aspidoscelis burti</i>          | 1 | Harvey et al. (2012)                                                  |
| Teiidae | <i>Aspidoscelis ceralbensis</i>    | 1 | Harvey et al. (2012)                                                  |
| Teiidae | <i>Aspidoscelis communis</i>       | 1 | Harvey et al. (2012)                                                  |
| Teiidae | <i>Aspidoscelis costatus</i>       | 1 | Harvey et al. (2012)                                                  |
| Teiidae | <i>Aspidoscelis deppei</i>         | 1 | Harvey et al. (2012)                                                  |
| Teiidae | <i>Aspidoscelis gularis</i>        | 1 | Harvey et al. (2012)                                                  |
| Teiidae | <i>Aspidoscelis guttatus</i>       | 1 | Harvey et al. (2012)                                                  |
| Teiidae | <i>Aspidoscelis hyperythrus</i>    | 1 | Harvey et al. (2012)                                                  |
| Teiidae | <i>Aspidoscelis inornatus</i>      | 1 | Harvey et al. (2012)                                                  |
| Teiidae | <i>Aspidoscelis laredoensis</i>    | 1 | Harvey et al. (2012)                                                  |
| Teiidae | <i>Aspidoscelis lineattissimus</i> | 1 | Harvey et al. (2012)                                                  |
| Teiidae | <i>Aspidoscelis marmoratus</i>     | 1 | Harvey et al. (2012)                                                  |
| Teiidae | <i>Aspidoscelis sexlineatus</i>    | 1 | Harvey et al. (2012)                                                  |
| Teiidae | <i>Aspidoscelis tigris</i>         | 1 | Harvey et al. (2012)                                                  |
| Teiidae | <i>Aspidoscelis velox</i>          | 1 | Harvey et al. (2012)                                                  |
| Teiidae | <i>Callopistes flavipunctatus</i>  | 0 | Harvey et al. (2012)                                                  |
| Teiidae | <i>Callopistes maculatus</i>       | 0 | Harvey et al. (2012)                                                  |
| Teiidae | <i>Cnemidophorus arenivagus</i>    | 1 | Avila-Pires (1995); Cabrera and Carreira (2009); Harvey et al. (2012) |
| Teiidae | <i>Cnemidophorus gramivagus</i>    | 1 | Avila-Pires (1995); Harvey et al. (2012)                              |
| Teiidae | <i>Cnemidophorus lacertoides</i>   | 1 | Avila-Pires (1995)                                                    |
| Teiidae | <i>Cnemidophorus lemniscatus</i>   | 1 | Avila-Pires (1995)                                                    |
| Teiidae | <i>Cnemidophorus longicaudus</i>   | 1 | Avila-Pires (1995)                                                    |
| Teiidae | <i>Cnemidophorus ocellifer</i>     | 1 | Avila-Pires (1995)                                                    |
| Teiidae | <i>Cnemidophorus vanzoi</i>        | 1 | Avila-Pires (1995); Harvey et al. (2012)                              |
| Teiidae | <i>Crocodylurus amazonicus</i>     | 1 | Harvey et al. (2012)                                                  |
| Teiidae | <i>Dicrodon guttulatum</i>         | 1 | Harvey et al. (2012)                                                  |
| Teiidae | <i>Dracaena guianensis</i>         | 1 | Avila-Pires (1995); Harvey et al. (2012)                              |
| Teiidae | <i>Kentropyx altamazonica</i>      | 1 | Avila-Pires (1995)                                                    |
| Teiidae | <i>Kentropyx calcarata</i>         | 1 | Avila-Pires (1995)                                                    |
| Teiidae | <i>Kentropyx paulensis</i>         | 1 | Avila-Pires (1995)                                                    |

|                |                                    |   |                                          |
|----------------|------------------------------------|---|------------------------------------------|
| Teiidae        | <i>Kentropyx pelviceps</i>         | 1 | Avila-Pires (1995)                       |
| Teiidae        | <i>Kentropyx striata</i>           | 1 | Avila-Pires (1995)                       |
| Teiidae        | <i>Kentropyx vanzoi</i>            | 1 | Avila-Pires (1995); Harvey et al. (2012) |
| Teiidae        | <i>Kentropyx viridistriga</i>      | 1 | Avila-Pires (1995); Harvey et al. (2012) |
| Teiidae        | <i>Teius teyou</i>                 | 1 | Avila-Pires (1995)                       |
| Teiidae        | <i>Tupinambis duseni</i>           | 1 | Avila-Pires (1995)                       |
| Teiidae        | <i>Tupinambis longilineus</i>      | 1 | Avila-Pires (1995)                       |
| Teiidae        | <i>Tupinambis merianae</i>         | 1 | Avila-Pires (1995)                       |
| Teiidae        | <i>Tupinambis quadrilineatus</i>   | 1 | Avila-Pires (1995)                       |
| Teiidae        | <i>Tupinambis rufescens</i>        | 1 | Avila-Pires (1995)                       |
| Teiidae        | <i>Tupinambis teguixin</i>         | 1 | Avila-Pires (1995)                       |
| Trogonophiidae | <i>Diplometopon zarudnyi</i>       | 1 | Gans (1960)                              |
| Trogonophiidae | <i>Trogonophis wiegmanni</i>       | 0 | Gans (1960)                              |
| Tropiduridae   | <i>Eurolophosaurus amathites</i>   | 0 | Vitt and Caldwell (2014)                 |
| Tropiduridae   | <i>Eurolophosaurus divaricatus</i> | 0 | Vitt and Caldwell (2014)                 |
| Tropiduridae   | <i>Eurolophosaurus nanuzae</i>     | 0 | Vitt and Caldwell (2014)                 |
| Tropiduridae   | <i>Microlophus albemarlensis</i>   | 0 | Vitt and Caldwell (2014)                 |
| Tropiduridae   | <i>Microlophus atacamensis</i>     | 0 | Vitt and Caldwell (2014)                 |
| Tropiduridae   | <i>Microlophus bivittatus</i>      | 0 | Vitt and Caldwell (2014)                 |
| Tropiduridae   | <i>Microlophus delanonis</i>       | 0 | Vitt and Caldwell (2014)                 |
| Tropiduridae   | <i>Microlophus duncanensis</i>     | 0 | Vitt and Caldwell (2014)                 |
| Tropiduridae   | <i>Microlophus grayii</i>          | 0 | Vitt and Caldwell (2014)                 |
| Tropiduridae   | <i>Microlophus habelii</i>         | 0 | Vitt and Caldwell (2014)                 |
| Tropiduridae   | <i>Microlophus heterolepis</i>     | 0 | Vitt and Caldwell (2014)                 |
| Tropiduridae   | <i>Microlophus koepckeorum</i>     | 0 | Vitt and Caldwell (2014)                 |
| Tropiduridae   | <i>Microlophus occipitalis</i>     | 0 | Vitt and Caldwell (2014)                 |
| Tropiduridae   | <i>Microlophus pacificus</i>       | 0 | Vitt and Caldwell (2014)                 |
| Tropiduridae   | <i>Microlophus peruvianus</i>      | 0 | Vitt and Caldwell (2014)                 |
| Tropiduridae   | <i>Microlophus quadrivittatus</i>  | 0 | Vitt and Caldwell (2014)                 |
| Tropiduridae   | <i>Microlophus stolzmanni</i>      | 0 | Vitt and Caldwell (2014)                 |
| Tropiduridae   | <i>Microlophus theresiae</i>       | 0 | Vitt and Caldwell (2014)                 |
| Tropiduridae   | <i>Microlophus theresioides</i>    | 0 | Vitt and Caldwell (2014)                 |

|              |                                   |   |                          |
|--------------|-----------------------------------|---|--------------------------|
| Tropiduridae | <i>Microlophus thoracicus</i>     | 0 | Vitt and Caldwell (2014) |
| Tropiduridae | <i>Microlophus tigris</i>         | 0 | Vitt and Caldwell (2014) |
| Tropiduridae | <i>Microlophus yanezi</i>         | 0 | Vitt and Caldwell (2014) |
| Tropiduridae | <i>Plica lumaria</i>              | 0 | Vitt and Caldwell (2014) |
| Tropiduridae | <i>Plica plica</i>                | 0 | Vitt and Caldwell (2014) |
| Tropiduridae | <i>Plica umbra</i>                | 0 | Vitt and Caldwell (2014) |
| Tropiduridae | <i>Stenocercus angel</i>          | 0 | Vitt and Caldwell (2014) |
| Tropiduridae | <i>Stenocercus angulifer</i>      | 0 | Vitt and Caldwell (2014) |
| Tropiduridae | <i>Stenocercus apurimacus</i>     | 0 | Vitt and Caldwell (2014) |
| Tropiduridae | <i>Stenocercus azureus</i>        | 0 | Vitt and Caldwell (2014) |
| Tropiduridae | <i>Stenocercus boettgeri</i>      | 0 | Vitt and Caldwell (2014) |
| Tropiduridae | <i>Stenocercus caducus</i>        | 0 | Vitt and Caldwell (2014) |
| Tropiduridae | <i>Stenocercus chota</i>          | 0 | Vitt and Caldwell (2014) |
| Tropiduridae | <i>Stenocercus chrysopygus</i>    | 0 | Vitt and Caldwell (2014) |
| Tropiduridae | <i>Stenocercus crassicaudatus</i> | 0 | Vitt and Caldwell (2014) |
| Tropiduridae | <i>Stenocercus cupreus</i>        | 0 | Vitt and Caldwell (2014) |
| Tropiduridae | <i>Stenocercus doellojuradoi</i>  | 0 | Vitt and Caldwell (2014) |
| Tropiduridae | <i>Stenocercus empetrus</i>       | 0 | Vitt and Caldwell (2014) |
| Tropiduridae | <i>Stenocercus eunetopsis</i>     | 0 | Vitt and Caldwell (2014) |
| Tropiduridae | <i>Stenocercus festae</i>         | 0 | Vitt and Caldwell (2014) |
| Tropiduridae | <i>Stenocercus formosus</i>       | 0 | Vitt and Caldwell (2014) |
| Tropiduridae | <i>Stenocercus guentheri</i>      | 0 | Vitt and Caldwell (2014) |
| Tropiduridae | <i>Stenocercus humeralis</i>      | 0 | Vitt and Caldwell (2014) |
| Tropiduridae | <i>Stenocercus imitator</i>       | 0 | Vitt and Caldwell (2014) |
| Tropiduridae | <i>Stenocercus iridescent</i>     | 0 | Vitt and Caldwell (2014) |
| Tropiduridae | <i>Stenocercus latebrosus</i>     | 0 | Vitt and Caldwell (2014) |
| Tropiduridae | <i>Stenocercus limitaris</i>      | 0 | Vitt and Caldwell (2014) |
| Tropiduridae | <i>Stenocercus marmoratus</i>     | 0 | Vitt and Caldwell (2014) |
| Tropiduridae | <i>Stenocercus melanopygus</i>    | 0 | Vitt and Caldwell (2014) |
| Tropiduridae | <i>Stenocercus ochoai</i>         | 0 | Vitt and Caldwell (2014) |
| Tropiduridae | <i>Stenocercus orientalis</i>     | 0 | Vitt and Caldwell (2014) |
| Tropiduridae | <i>Stenocercus ornatissimus</i>   | 0 | Vitt and Caldwell (2014) |
| Tropiduridae | <i>Stenocercus ornatus</i>        | 0 | Vitt and Caldwell (2014) |



|              |                                   |   |                                                                                       |
|--------------|-----------------------------------|---|---------------------------------------------------------------------------------------|
| Tropiduridae | <i>Stenocercus percultus</i>      | 0 | Vitt and Caldwell (2014)                                                              |
| Tropiduridae | <i>Stenocercus puyango</i>        | 0 | Vitt and Caldwell (2014)                                                              |
| Tropiduridae | <i>Stenocercus rhodomelas</i>     | 0 | Vitt and Caldwell (2014)                                                              |
| Tropiduridae | <i>Stenocercus roseiventris</i>   | 0 | Vitt and Caldwell (2014)                                                              |
| Tropiduridae | <i>Stenocercus scapularis</i>     | 0 | Vitt and Caldwell (2014)                                                              |
| Tropiduridae | <i>Stenocercus stigmatosus</i>    | 0 | Vitt and Caldwell (2014)                                                              |
| Tropiduridae | <i>Stenocercus torquatus</i>      | 0 | Vitt and Caldwell (2014)                                                              |
| Tropiduridae | <i>Stenocercus varius</i>         | 0 | Vitt and Caldwell (2014)                                                              |
| Tropiduridae | <i>Strobilurus torquatus</i>      | 0 | Vitt and Caldwell (2014)                                                              |
| Tropiduridae | <i>Tropidurus bogerti</i>         | 0 | Vitt and Caldwell (2014)                                                              |
| Tropiduridae | <i>Tropidurus callathelys</i>     | 0 | Vitt and Caldwell (2014)                                                              |
| Tropiduridae | <i>Tropidurus cocorobensis</i>    | 0 | Vitt and Caldwell (2014)                                                              |
| Tropiduridae | <i>Tropidurus erythrocephalus</i> | 0 | Vitt and Caldwell (2014)                                                              |
| Tropiduridae | <i>Tropidurus etheridgei</i>      | 0 | Vitt and Caldwell (2014)                                                              |
| Tropiduridae | <i>Tropidurus hispidus</i>        | 0 | Vitt and Caldwell (2014)                                                              |
| Tropiduridae | <i>Tropidurus hygomi</i>          | 0 | Vitt and Caldwell (2014)                                                              |
| Tropiduridae | <i>Tropidurus insulanus</i>       | 0 | Vitt and Caldwell (2014)                                                              |
| Tropiduridae | <i>Tropidurus itambere</i>        | 0 | Vitt and Caldwell (2014)                                                              |
| Tropiduridae | <i>Tropidurus montanus</i>        | 0 | Vitt and Caldwell (2014)                                                              |
| Tropiduridae | <i>Tropidurus mucujensis</i>      | 0 | Vitt and Caldwell (2014)                                                              |
| Tropiduridae | <i>Tropidurus oreadicus</i>       | 0 | Vitt and Caldwell (2014)                                                              |
| Tropiduridae | <i>Tropidurus psammonastes</i>    | 0 | Vitt and Caldwell (2014)                                                              |
| Tropiduridae | <i>Tropidurus spinulosus</i>      | 0 | Vitt and Caldwell (2014)                                                              |
| Tropiduridae | <i>Tropidurus torquatus</i>       | 0 | Vitt and Caldwell (2014)                                                              |
| Tropiduridae | <i>Uracentron flaviceps</i>       | 0 | Vitt and Caldwell (2014)                                                              |
| Tropiduridae | <i>Uranoscodon superciliosus</i>  | 0 | Vitt and Caldwell (2014)                                                              |
| Varanidae    | <i>Varanus acanthurus</i>         | 0 | Camp (1923); Smith (1935); Estes et al. (1988); Jullien and Renous-Lécuru (1972,1973) |
| Varanidae    | <i>Varanus albigularis</i>        | 0 | Camp (1923); Smith (1935); Estes et al. (1988); Jullien and Renous-Lécuru (1972,1973) |
| Varanidae    | <i>Varanus baritji</i>            | 0 | Camp (1923); Smith (1935); Estes et al. (1988); Jullien and Renous-Lécuru (1972,1973) |
| Varanidae    | <i>Varanus beccarii</i>           | 0 | Camp (1923); Smith (1935); Estes et al. (1988); Jullien and Renous-Lécuru (1972,1973) |
| Varanidae    | <i>Varanus bengalensis</i>        | 0 | Camp (1923); Smith (1935); Estes et al. (1988); Jullien and Renous-Lécuru (1972,1973) |

|           |                               |   |                                                                                       |
|-----------|-------------------------------|---|---------------------------------------------------------------------------------------|
| Varanidae | <i>Varanus boehmei</i>        | 0 | Camp (1923); Smith (1935); Estes et al. (1988); Jullien and Renous-Lécure (1972,1973) |
| Varanidae | <i>Varanus brevicauda</i>     | 0 | Camp (1923); Smith (1935); Estes et al. (1988); Jullien and Renous-Lécure (1972,1973) |
| Varanidae | <i>Varanus bushi</i>          | 0 | Camp (1923); Smith (1935); Estes et al. (1988); Jullien and Renous-Lécure (1972,1973) |
| Varanidae | <i>Varanus caerulivirens</i>  | 0 | Camp (1923); Smith (1935); Estes et al. (1988); Jullien and Renous-Lécure (1972,1973) |
| Varanidae | <i>Varanus caudolineatus</i>  | 0 | Camp (1923); Smith (1935); Estes et al. (1988); Jullien and Renous-Lécure (1972,1973) |
| Varanidae | <i>Varanus cerambonensis</i>  | 0 | Camp (1923); Smith (1935); Estes et al. (1988); Jullien and Renous-Lécure (1972,1973) |
| Varanidae | <i>Varanus doreanus</i>       | 0 | Camp (1923); Smith (1935); Estes et al. (1988); Jullien and Renous-Lécure (1972,1973) |
| Varanidae | <i>Varanus dumerilii</i>      | 0 | Camp (1923); Smith (1935); Estes et al. (1988); Jullien and Renous-Lécure (1972,1973) |
| Varanidae | <i>Varanus eremius</i>        | 0 | Camp (1923); Smith (1935); Estes et al. (1988); Jullien and Renous-Lécure (1972,1973) |
| Varanidae | <i>Varanus exanthematicus</i> | 0 | Camp (1923); Smith (1935); Estes et al. (1988); Jullien and Renous-Lécure (1972,1973) |
| Varanidae | <i>Varanus finschi</i>        | 0 | Camp (1923); Smith (1935); Estes et al. (1988); Jullien and Renous-Lécure (1972,1973) |
| Varanidae | <i>Varanus flavescens</i>     | 0 | Camp (1923); Smith (1935); Estes et al. (1988); Jullien and Renous-Lécure (1972,1973) |
| Varanidae | <i>Varanus giganteus</i>      | 0 | Camp (1923); Smith (1935); Estes et al. (1988); Jullien and Renous-Lécure (1972,1973) |
| Varanidae | <i>Varanus gilleni</i>        | 0 | Camp (1923); Smith (1935); Estes et al. (1988); Jullien and Renous-Lécure (1972,1973) |
| Varanidae | <i>Varanus glauerti</i>       | 0 | Camp (1923); Smith (1935); Estes et al. (1988); Jullien and Renous-Lécure (1972,1973) |
| Varanidae | <i>Varanus glebopalma</i>     | 0 | Camp (1923); Smith (1935); Estes et al. (1988); Jullien and Renous-Lécure (1972,1973) |
| Varanidae | <i>Varanus gouldii</i>        | 0 | Camp (1923); Smith (1935); Estes et al. (1988); Jullien and Renous-Lécure (1972,1973) |
| Varanidae | <i>Varanus griseus</i>        | 0 | Camp (1923); Smith (1935); Estes et al. (1988); Jullien and Renous-Lécure (1972,1973) |
| Varanidae | <i>Varanus indicus</i>        | 0 | Camp (1923); Smith (1935); Estes et al. (1988); Jullien and Renous-Lécure (1972,1973) |
| Varanidae | <i>Varanus jobiensis</i>      | 0 | Camp (1923); Smith (1935); Estes et al. (1988); Jullien and Renous-Lécure (1972,1973) |
| Varanidae | <i>Varanus keithhornei</i>    | 0 | Camp (1923); Smith (1935); Estes et al. (1988); Jullien and Renous-Lécure (1972,1973) |
| Varanidae | <i>Varanus kingorum</i>       | 0 | Camp (1923); Smith (1935); Estes et al. (1988); Jullien and Renous-Lécure (1972,1973) |
| Varanidae | <i>Varanus komodoensis</i>    | 0 | Camp (1923); Smith (1935); Estes et al. (1988); Jullien and Renous-Lécure (1972,1973) |
| Varanidae | <i>Varanus macraei</i>        | 0 | Camp (1923); Smith (1935); Estes et al. (1988); Jullien and Renous-Lécure (1972,1973) |
| Varanidae | <i>Varanus marmoratus</i>     | 0 | Camp (1923); Smith (1935); Estes et al. (1988); Jullien and Renous-Lécure (1972,1973) |
| Varanidae | <i>Varanus melinus</i>        | 0 | Camp (1923); Smith (1935); Estes et al. (1988); Jullien and Renous-Lécure (1972,1973) |
| Varanidae | <i>Varanus mertensi</i>       | 0 | Camp (1923); Smith (1935); Estes et al. (1988); Jullien and Renous-Lécure (1972,1973) |
| Varanidae | <i>Varanus mitchelli</i>      | 0 | Camp (1923); Smith (1935); Estes et al. (1988); Jullien and Renous-Lécure (1972,1973) |
| Varanidae | <i>Varanus niloticus</i>      | 0 | Camp (1923); Smith (1935); Estes et al. (1988); Jullien and Renous-Lécure (1972,1973) |
| Varanidae | <i>Varanus olivaceus</i>      | 0 | Camp (1923); Smith (1935); Estes et al. (1988); Jullien                               |

|             |                                   |   |                                                                                       |
|-------------|-----------------------------------|---|---------------------------------------------------------------------------------------|
|             |                                   |   | and Renous-Lécure (1972,1973)                                                         |
| Varanidae   | <i>Varanus panoptes</i>           | 0 | Camp (1923); Smith (1935); Estes et al. (1988); Jullien and Renous-Lécure (1972,1973) |
| Varanidae   | <i>Varanus pilbarensis</i>        | 0 | Camp (1923); Smith (1935); Estes et al. (1988); Jullien and Renous-Lécure (1972,1973) |
| Varanidae   | <i>Varanus prasinus</i>           | 0 | Camp (1923); Smith (1935); Estes et al. (1988); Jullien and Renous-Lécure (1972,1973) |
| Varanidae   | <i>Varanus primordius</i>         | 0 | Camp (1923); Smith (1935); Estes et al. (1988); Jullien and Renous-Lécure (1972,1973) |
| Varanidae   | <i>Varanus rainerguentheri</i>    | 0 | Camp (1923); Smith (1935); Estes et al. (1988); Jullien and Renous-Lécure (1972,1973) |
| Varanidae   | <i>Varanus rosenbergi</i>         | 0 | Camp (1923); Smith (1935); Estes et al. (1988); Jullien and Renous-Lécure (1972,1973) |
| Varanidae   | <i>Varanus rudicollis</i>         | 0 | Camp (1923); Smith (1935); Estes et al. (1988); Jullien and Renous-Lécure (1972,1973) |
| Varanidae   | <i>Varanus salvadorii</i>         | 0 | Camp (1923); Smith (1935); Estes et al. (1988); Jullien and Renous-Lécure (1972,1973) |
| Varanidae   | <i>Varanus salvator</i>           | 0 | Camp (1923); Smith (1935); Estes et al. (1988); Jullien and Renous-Lécure (1972,1973) |
| Varanidae   | <i>Varanus scalaris</i>           | 0 | Camp (1923); Smith (1935); Estes et al. (1988); Jullien and Renous-Lécure (1972,1973) |
| Varanidae   | <i>Varanus semiremex</i>          | 0 | Camp (1923); Smith (1935); Estes et al. (1988); Jullien and Renous-Lécure (1972,1973) |
| Varanidae   | <i>Varanus spenceri</i>           | 0 | Camp (1923); Smith (1935); Estes et al. (1988); Jullien and Renous-Lécure (1972,1973) |
| Varanidae   | <i>Varanus storri</i>             | 0 | Camp (1923); Smith (1935); Estes et al. (1988); Jullien and Renous-Lécure (1972,1973) |
| Varanidae   | <i>Varanus timorensis</i>         | 0 | Camp (1923); Smith (1935); Estes et al. (1988); Jullien and Renous-Lécure (1972,1973) |
| Varanidae   | <i>Varanus tristis</i>            | 0 | Camp (1923); Smith (1935); Estes et al. (1988); Jullien and Renous-Lécure (1972,1973) |
| Varanidae   | <i>Varanus varius</i>             | 0 | Camp (1923); Smith (1935); Estes et al. (1988); Jullien and Renous-Lécure (1972,1973) |
| Varanidae   | <i>Varanus yemenensis</i>         | 0 | Camp (1923); Smith (1935); Estes et al. (1988); Jullien and Renous-Lécure (1972,1973) |
| Varanidae   | <i>Varanus yuwonoi</i>            | 0 | Camp (1923); Smith (1935); Estes et al. (1988); Jullien and Renous-Lécure (1972,1973) |
| Xantusiidae | <i>Cricosaura typica</i>          | 1 | Savage (1963)                                                                         |
| Xantusiidae | <i>Lepidophyma cuicateca</i>      | 1 | Bezy and Camarillo (2002)                                                             |
| Xantusiidae | <i>Lepidophyma dontomasi</i>      | 1 | Bezy and Camarillo (2002)                                                             |
| Xantusiidae | <i>Lepidophyma flavimaculatum</i> | 1 | Bezy and Camarillo (2002)                                                             |
| Xantusiidae | <i>Lepidophyma gaegeae</i>        | 1 | Bezy and Camarillo (2002)                                                             |
| Xantusiidae | <i>Lepidophyma lineri</i>         | 1 | Bezy and Camarillo (2002)                                                             |
| Xantusiidae | <i>Lepidophyma lipetzi</i>        | 1 | Bezy and Camarillo (2002)                                                             |
| Xantusiidae | <i>Lepidophyma lowei</i>          | 1 | Bezy and Camarillo (2002)                                                             |
| Xantusiidae | <i>Lepidophyma mayae</i>          | 1 | Bezy and Camarillo (2002)                                                             |
| Xantusiidae | <i>Lepidophyma micropholis</i>    | 1 | Bezy and Camarillo (2002)                                                             |
| Xantusiidae | <i>Lepidophyma occulor</i>        | 1 | Bezy and Camarillo (2002)                                                             |
| Xantusiidae | <i>Lepidophyma pajapanensis</i>   | 1 | Bezy and Camarillo (2002)                                                             |

|              |                                |   |                                                                         |
|--------------|--------------------------------|---|-------------------------------------------------------------------------|
| Xantusiidae  | <i>Lepidophyma radula</i>      | 1 | Bezy and Camarillo (2002)                                               |
| Xantusiidae  | <i>Lepidophyma reticulatum</i> | 1 | Bezy and Camarillo (2002)                                               |
| Xantusiidae  | <i>Lepidophyma smithii</i>     | 1 | Bezy and Camarillo (2002)                                               |
| Xantusiidae  | <i>Lepidophyma sylvaticum</i>  | 1 | Bezy and Camarillo (2002)                                               |
| Xantusiidae  | <i>Lepidophyma tuxtlae</i>     | 1 | Bezy and Camarillo (2002)                                               |
| Xantusiidae  | <i>Xantusia arizonae</i>       | 1 | Smith (1946); Bezy et al. (2008)                                        |
| Xantusiidae  | <i>Xantusia bezyi</i>          | 1 | Smith (1946)                                                            |
| Xantusiidae  | <i>Xantusia bolsonae</i>       | 1 | Smith (1946)                                                            |
| Xantusiidae  | <i>Xantusia gracilis</i>       | 1 | Smith (1946)                                                            |
| Xantusiidae  | <i>Xantusia henshawi</i>       | 1 | Smith (1946); Lee (1976)                                                |
| Xantusiidae  | <i>Xantusia riversiana</i>     | 1 | Smith (1946)                                                            |
| Xantusiidae  | <i>Xantusia sanchezi</i>       | 1 | Smith (1946); Cruz-Sàenz and Lazcano (2012)                             |
| Xantusiidae  | <i>Xantusia vigilis</i>        | 1 | Smith (1946)                                                            |
| Xantusiidae  | <i>Xantusia wigginsi</i>       | 1 | Smith (1946)                                                            |
| Xenosauridae | <i>Xenosaurus grandis</i>      | 0 | Camp (1923); Estes et al. (1988); Jullien and Renous-Lécure (1972,1973) |
| Xenosauridae | <i>Xenosaurus platyceps</i>    | 0 | Camp (1923); Estes et al. (1988); Jullien and Renous-Lécure (1972,1973) |

## References

- Amaral, A. do. 1935. Um novo genero e duas novas especies de Geckonideos e uma nova raça de Amphisbaenideo, procedentes do Brasil Central. *Memorais do Instituto Butantan* 9:253–256.
- Amaral, A. do. 1950. Two new South American lizards. *Copeia* 1950:281–284.
- Amarasinghe, A.A.T., and A.M. Bauer. 2009. On the holotype of *Cnemaspis podihuna* Deraniyagala, 1944. *Taprobanica* 1:80–82.
- Amarasinghe, A.A.T., A.M. Bauer, I. Ineich, J. Rudge, M. Bahir and D. Gabadage. 2009. The original descriptions and figures of Sri Lankan Gekkonid Lizards (Squamata: Gekkonidae) of the 18th, 19th and 20th Centuries. *Taprobanica* 1:83–106.
- Ananjeva, N.B., and B.L. Stuart. 2001. The agamid lizard *Ptyctolaemus phuwuanensis* (Manthey and Nabhitabhata, 1991) from Thailand and Laos represents a new genus. *Russian Journal of Herpetology* 8:165–170.
- Ananjeva, N.B., N.L. Orlov, R.G. Khalikov, I.S. Darevsky, I.S. Ryabov and A.V. Barabanov. 2006. The Reptiles of North Eurasia. Taxonomic Diversity, Distribution, Conservation Status. Pensoft, Bulgaria.

- Anderson, S.C., and Leviton, A.E. 1966. A new species of *Eublepharis* from Southwestern Iran (Reptilia: Gekkonidae). Occasional Papers of the California Academy of Sciences 53:1–5.
- Angel, F. 1922. Sur un lézard d'un genre nouveau de la famille de Gerrhosauridae. Bulletin du Musée d'Histoire Naturelle de Paris 28:150–152.
- Arias, F.J., C.M. De Carvalho, M.T. Rodrigues and H. Zaher. 2011. Two new species of *Cnemidophorus* (Squamata: Teiidae) from the Caatinga, Northwest Brazil. Zootaxa 2787:37–54.
- Arias, F.J., C.M. De Carvalho, M.T. Rodrigues and H. Zaher. 2011. Two new species of *Cnemidophorus* (Squamata: Teiidae) of the *C. ocellifer* group, from Bahia, Brazil. Zootaxa 3022:1–21.
- Arias, F.J., M. Teixeira, Jr., R.S. Recoder, C.M. de Carvalho, H. Zaher and M.T. Rodrigues. 2014. Whiptail lizards in South America: A new *Ameivula* (Squamata, Teiidae) from Planalto dos Gerais, Eastern Brazilian Cerrado. Amphibia-Reptilia 35:227–242.
- Arnold, E.N. 1977. Little-known geckoes (Reptilia: Gekkonidae) from Arabia with descriptions of two new species from the Sultanate of Oman. The Scientific Results of the Oman Flora and Fauna Survey, 1975. Journal of Oman Studies, Special Report 1:81–110.
- Arnold, E.N. 1980. Reptiles of Saudi Arabia. A review of the lizard genus *Stenodactylus* (Reptilia: Gekkonidae). Fauna of Saudi Arabia 2:368–404.
- Arnold, E.N. 1992. The Rajasthan Toad-headed lizard, *Phrynocephalus laungwalaensis* (Reptilia: Agamidae), represents a new genus. Journal of Herpetology 26:467–472.
- Ávila-Pires, T.C.S. 1995. Lizards of Brazilian Amazonia (Reptilia: Squamata). Zoologische Verhandelingen 299:1–706.
- Baeckens, S., S. Edwards, K. Huyghe and R. Van Damme. In press. Chemical signalling in lizards: an interspecific comparison of femoral pore numbers in Lacertidae. Biological Journal of the Linnean Society. DOI:10.1111/bij.12414
- Baha-El-Din, S.M. 2003. A new species of *Hemidactylus* (Squamata: Gekkonidae) from Egypt. African Journal of Herpetology 52:39–47.
- Baha-El-Din, S.M. 2005. An overview of Egyptian species of *Hemidactylus* (Gekkonidae), with the description of a new species from the high mountains of South Sinai. Zoology in the Middle East 34:11–26.
- Baig, K.J., P. Wagner, B. Natalia, A. Jeva and W. Böhme. 2012. A morphology-based taxonomic revision of *Laudakia* Gray, 1845 (Squamata: Agamidae). Vertebrate Zoology 62:213–260.

- Bartlett, R.D. 1938. Geckos: everything about selection, care, nutrition, diseases, breeding, and behavior. Barron's Educational Series Inc., USA.
- Bates, M.F. 2007. An analysis of the *Pseudocordylus melanotus* complex (Sauria: Cordylidae). Unpublished PhD dissertation. Stellenbosch University.
- Bates, M.F., K.A. Tolley, S. Edwards, Z. Davids, J.M. Da Silva and R. Williams. 2013. A molecular phylogeny of the African plated lizards, genus *Gerrhosaurus* Wiegmann, 1828 (Squamata: Gerrhosauridae), with the description of two new genera. *Zootaxa* 3750:465–493.
- Bauer, A.M. 2003. Descriptions of seven new *Cyrtodactylus* (Squamata: Gekkonidae) with a key to the species of Myanmar (Burma). *Proceedings of the California Academy of Sciences* 54:463–498.
- Bauer, A.M., and I. Das. 2000. A review of the gekkonid genus *Calodactylodes* (Reptilia: Squamata) from India and Sri Lanka. *Journal of South Asian Natural History* 5:25–35.
- Bauer, A.M., and T. Lamb. 2005. Phylogenetic relationships of southern African geckos in the *Pachydactylus* group (Squamata: Gekkonidae). *African Journal of Herpetology* 54:105–129.
- Bauer, A.M., and T.R. Jackman. 2006. A revision of the *Bavayia validiclavis* group (Squamata: Gekkota: Diplodactylidae), a clade of New Caledonian geckos exhibiting microendemism. *Proceedings of the California Academy of Sciences* 57:503–547.
- Bauer, A.M., and P. Russell. 2003. *Phyllodactylus wirshingi*. *Catalogue of American Amphibians and Reptiles*. Society for the Study of Amphibians and Reptiles 770:1–4.
- Bauer, A.M., and M. Sumontha. 2004. A New Species of *Dixonius* (Squamata: Gekkonidae) from Kanchanaburi Province, Western Thailand. *Current Herpetology* 23:17–26.
- Bauer, A.M., D.A. Good and W.R. Branch. 1997. The taxonomy of the southern African leaf-toed geckos (Squamata: Gekkonidae), with a review of Old World “*Phyllodactylus*” and the description of five new genera. *Proceedings of the California Academy of Sciences* 49:447–497.
- Bauer, A.M., T.R. Jackman, R. Sadler and A. Whitaker. 2009. Review and phylogeny of the New Caledonian diplodactylid gekkotan genus *Eurydactylodes* Wermuth, 1965, with the description of a new species. *Mémoires Du Muséum du Museum national d'Histoire naturelle* 198:13–36.
- Bezy, R.L., and J. L. Camarillo. 2002. Systematics of xantusiid lizards of the genus *Lepidophyma*. *Los Angeles County Museum Contributions in Science* 493:1–41.
- Bezy, R.L., K.B. Bezy and K. Bolles 2008. Two New Species of Night Lizards (Xantusia) from Mexico. *Journal of Herpetology* 42:680–688.

- Blanford, W.T. 1874. Descriptions of new lizards from Persia and Baluchistàn. *Annals and Magazine of Natural History* 13:453–455.
- Blair, C., N.L. Orlov, H.T. Shi and R.W. Murphy. 2009. A Taxonomic Re-Evaluation of *Goniurosaurus hainanensis* (Squamata: Eublepharidae) from Hainan Island, China. *Russian Journal of Herpetology* 16:35–40.
- Boettger, O. 1891. Reptilien und Batrachier aus Bolivien. *Zoologischer Anzeiger* 14:343–347.
- Böhme, W., P. Wagner, P. Malonza, S. Lötters and J. Köhler. 2005. A new species of the *Agama agama* group (Squamata: Agamidae) from Western Kenya, East Africa, with comments on *Agama lionotus* Boulenger 1896. *Russian Journal of Herpetology* 12:143–150.
- Boulenger, G.A. 1885. Catalogue of the Lizards in the British Museum (Nat. Hist.) I. Geckonidae, Eublepharidae, Uroplatidae, Pygopodidae, Agamidae. UK.
- Boulenger, G.A. 1885b. Description d'une espèce nouvelle d'agame. *Annali del Museo Civico di Storia Naturale Genova* 2:127–128.
- Boulenger, G. A. 1896. Second Report on the Reptiles and Batrachians collected by Dr. A. Donaldson Smith during his Expedition to Lake Rudolf. *Proceedings of the Zoological Society London* 1896:212–217.
- Boulenger, G.A. 1887. Description of a new genus of lizards of the family Teiidae. *Proceedings of the Zoological Society London* 1887:640.
- Boulenger, G A. 1899. Description of three new reptiles and a new batrachian from Mt. Kina Balu, North Borneo. *Annals and Magazine of Natural History* 4:451–453.
- Boulenger, G.A. 1891. Description of a new genus of Iguanoid lizards. *Annals and Magazine of Natural History* 8:85–86.
- Boulenger, G.A. 1900. Descriptions of new batrachians and Reptiles collected by Mr. P. O. Simons in Peru. *Annals and Magazine of Natural History* 6:181–186.
- Boulenger, G.A. 1903. Descriptions of new lizards in the collection of the British Museum. *Annals and Magazine of Natural History* 12:429–435.
- Boulenger, G.A. 1907. Second report on the reptiles and batrachians collected in South Africa by Mr. C.H.B. Grant, and presented to the British Museum by Mr. C.D. Rudd. *Proceedings of the Zoological Society London* 1907:478–487.
- Boulenger, G.A., and J.H. Power. 1921. A revision of the South African African Agamas allied to *Agama hispada* and *A. atra*. *Transactions of the Royal Society of South Africa, Capetown* 9:299–287.

- Branch, B. 1998. Field guide to the snakes and other reptiles of Southern Africa. Struik, South Africa.
- Broadley, D.G., C. Gans and J. Visser. 1976. Studies on amphisbaenians (Amphisbaenia, Reptilia): 6. The genera *Monopeltis* and *Dalophia* in Southern Africa. Bulletin of the American Museum of Natural History 157:311–486.
- Brown, W.C. 1976. Review of the Genus *Perochirus* (Gekkonidae). *Occasional Papers of the Museum of Zoology* 126:1–14.
- Brown, W.C., and F. Parker. 1977. Lizards of the genus *Lepidodactylus* (Gekkonidae) from the Indo-Australian Archipelago and the islands of the Pacific, with descriptions of new species. Proceedings of the California Academy of Sciences, Fourth Series 41:253–265.
- Brown, R.M., A. Diesmos and C. Oliveros. 2011. New Flap-Legged Forest Gecko (Genus *Luperosaurus*) from the Northern Philippines. *Journal of Herpetology* 45:202–210.
- Busais, S. 2011. Taxonomy and Molecular Phylogeny of *Hemidactylus* in the mainland of Yemen (Class: Reptilia, Order: Squamata, Family: Gekkonidae). Ph.D. Dissertation, Technische Universität Braunschweig, Germany.
- Cabrera, M.R. 2012. A new species of *Cnemidophorus* (Squamata, Teiidae) from the South American Chaco. *The Herpetological Journal* 22:123–131.
- Cabrera, M.R., and S. Carreira. 2009. A new, but probably extinct, species of *Cnemidophorus* (Squamata, Teiidae) from Uruguay. *The Herpetological Journal* 19:97–105.
- Camp, C. 1923. Classification of the lizards. Bulletin of the American Museum of Natural History 48:289–481.
- Carreira, S., M. Meneghel and F. Achaval. 2005. Reptiles de Uruguay. Facultad de Ciencias, Universidad Nacional de la Republica, Uruguay.
- Červenka, J., D. Frynta, and L. Kratochvíl. 2010. Phylogenetic relationships of the gecko genus *Carinatogekko* (Reptilia: Gekkonidae). *Zootaxa* 2636:59–64.
- Chabanaud, P. 1917. Énumération des reptiles non encore étudiés de l'Afrique occidentale, appartenant aux collections du Muséum, avec la description des espèces nouvelles. Bulletin du Musée d'Histoire Naturelle de Paris 23: 83–105.
- Chabanaud, P. 1918. Étude complémentaire de deux *Agama* de l'Afrique occidentale et description de quatre espèces nouvelles de reptiles de la même région. Bulletin du Musée d'Histoire Naturelle de Paris 24:104–112.



- Cruz-Sáenz, D., and D. Lazcano. 2012. Biological and ecological aspects of *Xantusia sanchezi*, an endangered lizard in an oak forest in the state of Jalisco, Mexico. *Revista Mexicana de Biodiversidad* 83:129–132.
- Cogger, H.G. 1975. New lizards of the genus *Pseudothecadactylus* (Lacertilia: Gekkonidae) from Arnhem Land and northwestern Australia. *Records of the Australian Museum*, 30:87–97.
- Cogger, H. 2014. *Reptiles and Amphibians of Australia*, Seventh Edition. CSIRO Publishing, Australia.
- Conrad, J. 2008. Phylogeny and systematics of Squamata (Reptilia) based on morphology. *Bulletin of the American Museum of Natural History* 310:1–182.
- Cope, E.D. 1876. Report on the Reptiles brought by Professor James Orton from the middle and upper Amazon and western Peru. *Journal of the Academy of Natural Sciences of Philadelphia* 8:159–183.
- Couper, P.J., J.A. Covacevich, and C. Moritz. 1993. A review of the leaf-tailed geckos endemic to Eastern Australia: A new genus, four new species, and other new data. *Memoirs of the Queensland Museum* 34:95–124.
- Couper P.J., C.J. Schneider, C.J. Hoskin, and J.A. Covacevich. 2000. Australian leaf-lailed geckos: phylogeny, a new genus, two new species and other new data. *Memoirs of the Queensland Museum* 45:253–265.
- Darevsky, I.S. 1992. Two New Species of the Worm-like Lizard *Dibamus* (Sauria, Dibamidae), with Remarks on the Distribution and Ecology of *Dibamus* in Vietnam. *Asiatic Herpetological Research* 4:1–12.
- Das, I. 1997. Resolution of the systematic status of *Eublepharis macularius fuscus* Boerner, 1981 (Eublepharidae: Sauria: Squamata). *Hamadryad* 22:13–20.
- Das, I. 2005. Revision of the Genus *Cnemaspis* Strauch, 1887 (Sauria: Gekkonidae), from the Mentawai and Adjacent Archipelagos off Western Sumatra, Indonesia, with the Description of Four New Species. *Journal of Herpetology* 39:233–247.
- Daza, J.D., J. Aurich and A.M. Bauer. 2012. Anatomy of an enigma: an osteological investigation of the Namibian festive gecko (*Narudasia festiva*: Gekkonidae: Gekkota). *Acta Zoologica* 93:465–486.
- De Rooij, N. 1915. *The reptiles of the Indo-Australian archipelago*. Brill, The Netherlands.
- Diong, C.H., and S.S.L. Lim. 1998. Taxonomic Review and Morphological Description of *Bronchocela cristatella* (Kuhl, 1820) (Squamata: Agamidae) with Notes on Other Species in the Genus. *Raffles Bulletin of Zoology* 46:345–359.
- Dixon, J.R. 1974. Systematic review of the lizard genus *Anotosaura* (Teiidae). *Herpetologica* 30:13–18.
- Dixon, J.R. 2000. *Amphibians and reptiles of Texas*. Texas A&M University Press, USA.

- Doan, T.M. 2003. A new phylogenetic classification for the gymnophthalmid genera *Cercosaura*, *Pantodactylus* and *Prionodactylus* (Reptilia: Squamata). *Zoological Journal of the Linnean Society* 137:101–115.
- Doan, T.M., and T. Castoe. 2003. Using Morphological and Molecular Evidence to Infer Species Boundaries within *Proctoporus bolivianus* Werner (Squamata:Gymnophthalmidae). *Herpetologica* 59:432–449.
- Doan, T.M., T. Castoe and W. Arriaga. 2005. Phylogenetic relationships of the genus *Proctoporus sensu stricto* (Squamata:Gymnophthalmidae), with a new species from Puno, southeastern Peru. *Herpetologica* 59:432–449.
- Doan, T.M., and T. Castoe. 2005. Phylogenetic taxonomy of the Cercosaurini (Squamata: Gymnophthalmidae), with new genera for species of *Neusticurus* and *Proctoporus*. *Zoological Journal of the Linnean Society* 143:405–416.
- Doan, T.M., and W. Lamar. 2012. A new montane species of *Cercosaura* (Squamata: Gymnophthalmidae) from Colombia, with notes on the distribution of the genus. *Zootaxa* 54:44–54.
- Doughty, P., and M. Hutchinson. 2008. A new species of *Lucasium* (Squamata: Diplodactylidae) from the southern deserts of Western Australia and South Australia. *Records of the Western Australian Museum* 25:95–106.
- Escobar, C.A., A. Labra and H.M. Niemeyer. 2001. Chemical composition of precloacal secretions of *Liolaemus* lizards. *Journal of Chemical Ecology* 27:1677–90.
- Estes, R., K. de Queiroz and J.A. Gauthier. 1988. Phylogenetic relationships within Squamata. Pp. 119–281 in *Phylogenetic Relationships of the Lizard Families* (R. Estes and G. Pregill, eds.). Stanford University Press, USA.
- Etheridge, R., and K. de Queiroz. 1988. A phylogeny of Iguanidae. Pp. 283–367 in *Phylogenetic Relationships of the Lizard Families* (R. Estes and G. Pregill, eds.). Stanford University Press, USA.
- Etheridge, R, and E.E. Williams. 1991. A review of the South American lizard genera *Urostrophus* and *Anisolepis* (Squamata: Iguania: Polychridae). *Bulletin of the Museum of Comparative Zoology* 152:317–361.
- Flachsbarth, B., M. Fritzsche, P.J. Weldon and S. Schulz. 2009. Composition of the Cloacal Gland Secretion of *Tuatara*, *Sphenodon punctatus*. *Chemistry & Biodiversity* 6:1–37.
- Gans, C. 1960. Studies on amphisbaenians (Amphisbaenia, Reptilia), I. A taxonomic revision of the Trogonophidae, and a functional interpretation of the amphisbaenid adaptive pattern. *Bulletin of the American Museum of Natural History* 119:131–204.

- Gans, C. 1964a. The South American species of *Amphisbaena* with a vertically keeled tail (Reptilia, Amphisbaenidae). *Senckenbergiana Biologica* 45:387-416.
- Gans, C. 1964b. *Amphisbaena schmidtii*, a third species of genus from Puerto Rico (Amphisbaenia: Reptilia). *Brevoria* 198:1-11.
- Gans, C., and C. Rhodes. 1964. Notes on amphisbaenids (Amphisbaenia, Reptilia). 13. A systematic review of *Anops* Bell, 1833. *American Museum Novitates* 2186:1-25.
- Gans, C., and Dowling, H. 1967. *Rhineura floridana*. *Catalogue of American Amphibians and Reptiles* 42:1-2.
- Gans, C. 1971. Redescription of three monotypic genera of amphisbaenians from South America: *Aulura* Barbour, *Bronia* Gray, and *Mesobaena* Mertens. *American Museum Novitates* 2475:1-32.
- Gans, C. 1976. Three new spade-snouted amphisbaenians from Angola (Amphisbaenia, Reptilia). *American Museum Novitates* 2590:1-11.
- Gans, C. 1978. The characteristics and affinities of the Amphisbaenia. *Transactions of the Zoological Society of London* 34:347-416.
- Gans, C., and A.A. Alexander. 1962. Studies on amphisbaenids (Amphisbaenia, Reptilia). 2. On the amphisbaenids of the Antilles. *Bulletin of the Museum of Comparative Zoology Harvard* 128:65-158.
- Gans, C., and D.M. Kraklau. 1989. Studies on amphisbaenians (Reptilia) 8. Two genera of small species from East Africa (*Geocalamus* and *Loveridgea*). *American Museum Novitates* 2944:1-28.
- Gerlach, J., and K.L. Canning. 1996. A new species of the Western Indian Ocean gecko *Ailuronyx* (Reptilia; Gekkonidae). *The Herpetological Journal* 6:37-42.
- Glaw, F., and M. Vences. 1994. *A Fieldguide to the Amphibians and Reptiles of Madagascar*. Vences & Glaw Verlag, Germany.
- Grismer, L.L. 2002. *Amphibians and Reptiles of Baja California, Including Its Pacific Islands and the Islands in the Sea of Cortés (Organisms and Environments)*. University of California Press, USA.
- Giri, V., and A.M. Bauer. 2008. A new ground-dwelling *Hemidactylus* (Squamata : Gekkonidae) from Maharashtra, with a key to the *Hemidactylus* of India. *Zootaxa* 34:21-34.
- Goicoechea, N., J.M. Padial, J.C. Chaparro and I.D. La Riva. 2013. A Taxonomic Revision of *Proctoporus bolivianus* Werner (Squamata: Gymnophthalmidae) With the Description of Three New Species and Resurrection of *Proctoporus lacertus* Stejneger. *American Museum Novitates* 3786:1-32.
- Grandison, A.G.C. 1968. Nigerian lizards of the genus *Agama* (Sauria: Agamidae). *Bulleting of the British Museum for Natural History* 17:65-90.

- Greer, A. 1985. The Relationships of the Lizards Genera *Anelytropsis* and *Dibamus*. *Journal of Herpetology* 19:116–156.
- Grismer, L.L., M. Sumontha, M. Cota, J.L. Grismer, P.L. Wood, Jr. and S.G. Olivier. 2010. A revision and redescription of the rock gecko *Cnemaspis siamensis* (Taylor 1925) (Squamata: Gekkonidae) from Peninsular Thailand with descriptions of seven new species. *Zootaxa* 2576:1–55.
- Grismer, L.L., P.L. Wood, Jr., E.S.H. Quah, A. Shahrul, M.A. Muin, M. Sumontha, A. Norhayati, A.M. Bauer, S. Wangkulangkul, J.L. Grismer and O.S.G. Pauwels. 2012. A phylogeny and taxonomy of the Thai-Malay Peninsula Bent-toed Geckos of the *Cyrtodactylus pulchellus* complex (Squamata: Gekkonidae): combined morphological and molecular analyses with descriptions of seven new species. *Zootaxa* 3520:1–55.
- Guichenot, A. 1866. Notice sur un nouveau genre de sauriens de la famille des geckotiens du Muséum de Paris. *Mémoires de la Société Scientifique Naturelle de Chérbourg* 12:248–252.
- Haas, G. 1957. Some amphibians and reptiles from Arabia. *Proceedings of the California Academy of Sciences* 29:47–86.
- Hallermann, J., and W. Böhme. 2000. A review of the genus *Pseudocalotes* (Squamata: Agamidae), with description of a new species from West Malaysia. *Amphibia-Reptilia* 21:193–210.
- Harvey, M.B., G.N. Ugueto and R.L. Gutberlet, Jr. 2012. Review of Teiid Morphology with a Revised Taxonomy and Phylogeny of the Teiidae (Lepidosauria: Squamata). *Zootaxa* 3459: 1–156.
- Heifetz, W. 1941. A review of the lizards of the genus *Uma*. *Copeia* 1941:99–111.
- Heinicke, M.P., J.D. Daza, E. Greenbaum, T.R. Jackman and A.M. Bauer. 2014. Phylogeny, taxonomy and biogeography of a circum-Indian Ocean clade of leaf-toed geckos (Reptilia: Gekkota), with a description of two new genera. *Systematics and Biodiversity* 12:23–42.
- Hewitt, J. 1915. Descriptions of two new South African lizards, *Tetradactylus laevicauda* and *T. fitzsimonsi*. *Annals of the Transvaal Museum (Pretoria)* 5:101–103.
- Hojati, V., and R.B. Savasari. 2014. The Diet and Sexual Differences of the Caspian Bent-Toed Gecko, *Tenuidactylus caspius* (Squamata: Gekkonidae), in Northern Iran. *International Journal of Zoology*. DOI:10.1155/2014/698216
- Hoogmoed, M.S., and T.C.S. Avila-Pires. 1991. A new species of small *Amphisbaena* (Reptilia: Amphisbaenia: Amphisbaenidae) from the western Amazonian Brazil. *Boletim Do Museu Paraense Emilio Goeldi Serie Zoologia* 7:77–94.

- Hoogmoed, M.S., C. Cole and J. Ayarzagüena. 1992. A new cryptic species of lizard (Sauria: Teiidae: *Gymnophthalmus*) from Venezuela. *Zoologische Mededelingen* 66:1–18.
- Honda, M., H. Ota, T. Hikida and I.S. Darevsky. 2001. A new species of the worm-like lizard, *Dibamus* Duméril & Bibron 1839 (Squamata Dibamidae), from Vietnam. *Tropical Zoology* 14:119–125.
- Hoser, R.T. 2013. A revised taxonomy for the lizard families Gerrhosauridae and Cordylidae. *Australasian Journal of Herpetology* 3:3–32.
- Hoser, R.T., P. Road and P. Orchards. 2012. A reassessment of the Dibamidae, including the division of the genus *Dibamus* Duméril and Bibron, 1839 (Squamata : Sauria : Dibamidae). *Australasian Journal of Herpetology* 5698:31–32.
- Hoskin, C., P. Couper and C. Schneider. 2003. A new species of *Phyllurus* (Lacertilia: Gekkonidae) and a revised phylogeny and key for the Australian leaf-tailed geckos. *Australian Journal of Zoology* 51:153–164.
- Hoskin, C., and P. Couper. 2013. A spectacular new leaf-tailed gecko (Carphodactylidae: *Saltuarius*) from the Melville Range, north-east Australia. *Zootaxa* 3717:543–558.
- Hugall, A.F., R. Foster, M. Hutchinson and M.S.Y. Lee. 2008. Phylogeny of Australasian agamid lizards based on nuclear and mitochondrial genes: implications for morphological evolution and biogeography. *Biological Journal of the Linnean Society* 93:343–358.
- Ingram, G. 1978. A new species of gecko, genus *Cyrtodactylus*, from Cape York Peninsula, Queensland, Australia. *Victorian Naturalist* 95:142–146.
- Johnston, G.R. 1992. *Ctenophorus tjantjalka*, a new dragon lizard (Lacertilia: Agamidae) from northern South Australia. *Records of the South Australian Museum* 26:51–59.
- Jullien, R., and S. Renous-Lécuru. 1972. Réflexions sur la distribution des pores préanaux et fémoraux dans le sous-ordre des Lacertiliens. *Bulletin Du Muséum National D'Histoire Naturelle* 3:207–246.
- Jullien, R., and S. Renous-Lécuru. 1973. Étude de la répartition des pores fémoraux, anaux, préanaux et ventraux chez les Lacertiliens (Reptilia). *Bulletin Du Muséum National D'Histoire Naturelle* 78:1–32.
- Karamiani, R., and N. Rastegar-Pouyani. 2012. Westernmost Record of Khuzestan Dwarf Gecko *Tropiocolotes helenae helenae* (Nikolsky, 1907) (Sauria: Gekkonidae) from Kermanshah Province, Western Iran. *Russian Journal of Herpetology* 19:212–216.

- Khan, M.S. 2008. Review of the morphology, ecology, and distribution of geckos of the genus *Cyrtopodion*, with a note on generic placement of *Cyrtopodion brachykolon* Krysko et. al., 2007. *Caspian Journal of Environmental Science* 6:79–86.
- Khan, M. S., and M. Kumar. 2010. Notes on morphology, habits, ecology and distribution of short-tailed ground agama; *Brachysaura minor* (Hardwicke and Gray 1827). *Pakistan Journal of Wildlife* 1:31–35.
- Khan, M.S., and R. Tasnim. 1990. A new gecko of the genus *Tenuidactylus* from northeastern Punjab, Pakistan, and southwestern Azad Kashmir. *Herpetologica* 46:142–148.
- Kluge, A.G. 1974. A taxonomic revision of the lizard family Pygopodidae. *Miscellaneous Publications Museum of Zoology, University of Michigan* 147:1–221.
- Kluge, A.G. 1967a. Higher taxonomic categories of gekkonid lizards and their evolution. *Bulletin of the American Museum of Natural History* 135:1–59.
- Kluge, A.G. 1967b. Systematics, phylogeny, and zoogeography of the lizard genus *Diplodactylus* Gray (Gekkonidae). *Australian Journal of Zoology* 15:1007–1108.
- Kluge, A.G., and R.A. Nussbaum. 1995. A review of African-Madagascan gekkonid lizard phylogeny and biogeography (Squamata). *Miscellaneous Publications Museum of Zoology, University of Michigan* 183:1–20.
- Köhler, G., H.H. Diethert and M. Veselý. 2012. A Contribution To the Knowledge of the Lizard Genus *Alopoglossus* (Squamata: Gymnophthalmidae). *Herpetological Monographs* 26:173–188.
- Koch, C., P. Venegas and W. Böhme. 2006. A remarkable discovery: description of a big-growing new gecko (Squamata: Gekkonidae: *Phyllopezus*) from northwestern Peru. *Salamandra* 42:145–150.
- Kok, P.J.R. 2005. A New Genus and Species of Gymnophthalmid Lizard (Squamata: Gymnophthalmidae) from Kaieteur National Park, Guyana. *Bulletin de l'Institut Royal des Sciences naturelles de Belgique, Biologie* 75:35–45.
- Kok, P.J.R. 2009. Lizard in the clouds: a new highland genus and species of Gymnophthalmidae (Reptilia: Squamata) from Maringma tepui, western Guyana. *Zootaxa* 67:53–67.
- Kraus, F. 2005. The genus *Nactus* (Lacertilia: Gekkonidae): a phylogenetic analysis and description of two new species from the Papuan Region. *Zootaxa* 1061:1–28.
- Kraus, F. 2008. Taxonomic partitioning of *Cyrtodactylus louisadensis* (Lacertilia: Gekkonidae) from Papua New Guinea. *Zootaxa* 1883:1–27.

- Lee, J.C. 1975. The Autecology of *Xantusia henshawi henshawi* (Sauria: Xantusiidae). Transactions of the San Diego Society of Natural History 17:259–278.
- Lee, J.C. 1976. *Xantusia henshawi* Stejneger granite night lizard. Catalogue of American Amphibians and Reptiles 189:1–2.
- Lenglet, G. 2006. A review of the gekkotan lizards of Bénin, with the description of a new species of *Hemidactylus* (Squamata: Gekkonidae). Zootaxa 20:1–20.
- Leviton, A.E., and S.C. Anderson. 1967. Survey of the reptiles of the Sheikdom of Abu Dhabi, Arabian Peninsula. Part II. Systematic account of the collection of reptiles made in the Sheikdom of Abu Daby by John Gasperetti. Proceedings of the California Academy of Sciences 39:157–192.
- López, P., and J. Martín. 2009. Potential chemosignals associated with male identity in the amphisbaenian *Blanus cinereus*. Chemical Senses 34:479–86.
- Loveridge, A. 1936. African reptiles and amphibians in the Field Museum of Natural History. Field Museum of Natural History 22:1–122.
- Loveridge, A. 1941. Revision of the African lizards of the family Amphisbaenidae. Bulletin of the Museum of Comparative Zoology 87:353–451.
- Loveridge, A. 1944. Revision of the African lizards of the family Cordylidae. Bulletin of the Museum of Comparative Zoology 95:1–118.
- Loveridge, A. 1946. A new worm-lizard (*Ancylocranium barkeri*) from Tanganyika Territory. Proceedings of the Biological Society of Washington 59:73.
- Loveridge, A. 1947. Revision of the African lizards of the family Gekkoniidae. Bulletin of the Museum for Comparative Zoology 98:1–469.
- Mahroo, B.S., H. Ghaffari, A.S. Panah, H. Fahimi, A. Naderi and S. Bromand. 2013. New Geographic Distribution Records of Zarudny's Bent-Toed Gecko, *Mediodactylus russowii zarudnyi* Nikolsky, 1899 (Sauria: Gekkonidae) from Iran. Russian Journal of Herpetology 20:73–78.
- McLean, C.A., A. Moussalli, S. Sass and D. Stuart-Fox. 2013. Taxonomic assessment of the *Ctenophorus decresii* complex (Reptilia: Agamidae) reveals a new species of dragon lizard from western New South Wales. Records of the Australian Museum 65:51–63.
- Melnikov, D., E. Melnikova, R. Nazarov and M. Rajabizadeh. 2013. Taxonomic Revision of *Phrynocephalus persicus* De Filippi, 1863 Complex with Discription of a New Species from Zagros, Souther Iran. СОВРЕМЕННАЯ ГЕРПЕТОЛОГИЯ. 13:34–46.

- Meek, S.E., and C.B. Cory. 1910. Batrachians and reptiles from British East Africa. Publication of the Field Museum of Natural history 7:403–414.
- Mirza, Z., H. Bhosale and R. Sanap. 2013. First description of male *Hemidactylus sataraensis* Giri & Bauer 2008 (Sauria: Gekkonidae) with notes on its natural history, distribution and conservation status. Hamadryad 36:177–180.
- Mitchell, F.J. 1948. A revision of the lacertilian genus *Tympanocryptis*. Record of the South Australian Museum 9:57–86.
- Moody, S. 1980. Phylogenetic and historical biogeographical relationships of the genera in the family Agamidae (Reptilia: Lacertilia). Ph. D. Dissertation, University of Michigan, USA.
- Montanucci, R.R. 1973. Systematics and Evolution of the Andean Lizard Genus *Pholidobolus* (Sauria: Teiidae). Miscellaneous Publications Museum of Zoology, University of Michigan 59:1–52.
- McDowell, S.M. and C.M. Bogert. 1954 : The systematic position of *Lanthanotus* and the affinities of the anguimorphans lizards. Bulletin of the American Museum of Natural History 105:1–159.
- Nicholson, K., B. Crother, C. Guyer and J. Savage. 2012. It is time for a new classification of anoles (Squamata: Dactyloidae). Zootaxa 108:1–108.
- Nielsen, S.V, A.M. Bauer, T.R. Jackman, R.A. Hitchmough and C.H. Daugherty. 2011. New Zealand geckos (Diplodactylidae): Cryptic diversity in a post-Gondwanan lineage with trans-Tasman affinities. Molecular Phylogenetics and Evolution, 59:1–22.
- Nguyen, T.Q., A. Botov, M. Le Duc, L. Nophaseud, G.R. Zug and M. Bonkowski. 2014. A new species of *Hemiphyllodactylus* (Reptilia: Gekkonidae) from northern Laos. Zootaxa 3827:45–56.
- Nussbaum, R.A., and C. Raxworthy. 1994. The genus *Paragehyra* (Reptilia: Sauria: Gekkonidae) in southern Madagascar. Journal of Zoology 31:37–59.
- Parsa, H., and H. Oraie. 2009. Systematics and Distribution of the Iranian Plateau Leaf-toed Geckos of the Genus *Asaccus* (Sauria: Gekkonidae). Iranian Journal of Animal Biosystematics 5:43–55.
- Peloso, P.L.V., K.C.M. Pellegrino, M.T. Rodrigues, and T.C.S. Ávila-Pires. 2011. Description and Phylogenetic Relationships of a New Genus and Species of Lizard (Squamata, Gymnophthalmidae) from the Amazonian Rainforest of Northern Brazil. American Museum Novitates, 3713:1–24.
- Pepper, M., P. Dougherty, M.K. Fujita, C. Moritz and J.S. Keogh. 2013. Speciation on the Rocks: Integrated Systematics of the *Heteronotia spelea* Species Complex (Gekkota; Reptilia) from Western and Central Australia. PLoS ONE 8:e78110. DOI:10.1371/journal.pone.0078110



- Perez, R., S. Ribeiro and M. Borger-Martins. 2012. Reappraisal of the taxonomic status of *Amphisbaena prunicolor* (Cope 1885) and *Amphisbaena albocingulata* Boettger 1885 (Amphisbaenia: Amphisbaenidae). *Zootaxa* 3550:1–25.
- Perret, J. 1986. africaines du genre *Cnemaspis* Strauch, sous-genre *Ancylodactylus* Müller (Lacertilia, Gekkonidae), avec la description de quatre espèces nouvelles. *Revue Suisse de Zoologie* 93:457–505.
- Presch, W. 1980. Evolutionary history of the South American microteiid lizards (Teiidae: Gymnophthalminae). *Herpetologica* 34:108–112.
- Quang, H.X., N.L. Orlov, N.B. Ananjeva, A.G. Johns, H.N. Thao and Q. Dau. 2007. Description of a new species of the genus *Cyrtodactylus* Gray, 1827 (Squamata: Sauria: Gekkonidae) from the Karst of north central Vietnam. *Russian Journal of Herpetology* 14:98–106.
- Raselimanana, A.P., C.J. Raxworthy and R.A. Nussbaum 2000. A revision of the dwarf *Zonosaurus* Boulenger (Reptilia: Squamata: Cordylidae) from Madagascar, including descriptions of three new species. *Scientific Papers Natural History Museum University of Kansas* 18:1–16.
- Rastegar-Pouyani, N. 1998. Systematics and distribution of the Iranian species of *Trapelus* (Sauria: Agamidae) a review. *Russian Journal of Herpetology* 5.
- Rau, C.S., and R.B. Loomis. 1977. A new species of *Urosaurus* (Reptilia, Lacertilia, Iguanidae) from Baja California, Mexico. *Journal of Herpetology* 11:25–29. Reeder, T.W. 1996. A new species of *Pholidobolus* (Squamata: Gymnophthalmidae) from the Huancabamba depression of northern Peru. *Herpetologica* 52:282–289.
- Rezende-Pinto, F.M., L. Verrastro, J.C. Zanotelli and P.C.R. Barata. 2009. Reproductive biology and sexual dimorphism in *Cnemidophorus vacariensis* (Sauria, Teiidae) in the grasslands of the Araucaria Plateau, southern Brazil. *Iheringia. Série Zoologia* 99:82–9.
- Recoder, R.S., M.C. Ribeiro and M.T. Rodrigues. 2013. Spatial Variation in Morphometry in *Vanzosaura rubricauda* (Squamata, Gymnophthalmidae) from Open Habitats of South America and its Environmental Correlates. *South American Journal of Herpetology* 8:186–197.
- Ribeiro S., W. Vaz-Silva and Santos A., Jr. 2008. New pored Leposternon (Squamata, Amphisbaenia) from Brazilian Cerrado SÍRIA. *Zootaxa* 38:18–38.
- Rodrigues, M.T. 1984. *Nothobachia ablephara*: novo genero e especie do nordeste do Brasil (Sauria, Teiidae). *Papéis Avulsos de Zoologia (São Paulo)* 35:361–366.

- Rodrigues, M.T. 1986. Uma nova espécie do gênero *Phyllopezus* de Cabaceiras: Paraíba: Brasil; com comentários sobre a fauna de lagartos da área (Sauria, Gekkonidae). *Papéis Avulsos de Zoologia* 36: 237–250.
- Rodrigues, M.T. 1991. Herpetofauna das dunas interiores do rio São Francisco, Bahia, Brasil. 1. Introdução a área e descrição de um novo gênero de microteídeos (*Calyptommatus*) com notas sobre sua ecologia, distribuição e especiação (Sauria, Teiidae). *Papéis Avulsos de Zoologia* 37:385–320.
- Rodrigues, M.T. 1991. Herpetofauna das dunas interiores do rio São Francisco, Bahia, Brasil. 1. Introdução a área e descrição de um novo gênero de microteídeos (*Calyptommatus*) com notas sobre sua ecologia, distribuição e especiação (Sauria, Teiidae). *Papéis Avulsos de Zoologia* 37:385–320.
- Rodrigues, M.T. 1996. A new species of lizard, genus *Micrablepharus* (Squamata: Gymnophthalmidae), from Brazil. *Herpetologica* 52:535–541.
- Rodrigues, M.T. 2008. A new species of the lizard genus *Bachia* (Squamata: Gymnophthalmidae) from the Cerrados of Central Brazil. *Zootaxa* 1875:39–50.
- Rodrigues, M.T., and T.C.S. Ávila-Pires. 2005. New lizard of the genus *Leposoma* (Squamata, Gymnophthalmidae) from the Lower Rio Negro, Amazonas, Brazil. *Journal of Herpetology* 39:541–546.
- Rodrigues, M.T., K. Pellegrino, M. Dixo, V. Verdade, D. Pavan, A. Argolo and J. Sites, Jr. 2007. A New Genus of Microteiid Lizard from the Atlantic Forests of State of Bahia, Brazil, with a New Generic Name for *Colobosaura mentalis*, and a Discussion of Relationships Among the *Heterodactylini* (Squamata, Gymnophthalmidae). *American Museum Novitates* 3565:1–27.
- Rösler, H., and W. Wranik. 1999. Beiträge zur Herpetologie der Republik Jemen. 5. Drei neue Gecko-Arten vom Sokotra-Archipel (Reptilia: Sauria: Gekkonidae). *Zoologische Abhandlungen aus dem staatlichen Museum für Tierkunde in Dresden* 50:249–265.
- Salvidio, S., M. Menegon, R. Sindaco and D. Moyer. 2004. A new species of elongate seps from Udzungwa grasslands, southern Tanzania (Reptilia, Gerrhosauridae, *Tetradactylus* Merrem, 1820). *Amphibia-Reptilia* 25:19–27.
- Savage, J.M. 1963. Studies of the lizards family Xantusiidae IV. The Genera. Los Angeles County Museum Contributions in Science 71:1–38.
- Schmidt, K., and C. Bogert. 1947. A new fringe-footed sand lizard from Coahuila, Mexico. *American Museum Novitates* 1339:1–9.

- Shea, G., P. Couper, J. Wilmer and A. Amey. 2011. Revision of the genus *Cyrtodactylus* Gray, 1827 (Squamata: Gekkonidae) in Australia. *Zootaxa* 63:1–63.
- Smith, M.A. 1935. The fauna of British India, including Ceylon and Burma. Reptilia and Amphibia. Vol. II. Sauria. Taylors & Francis, UK.
- Stanley, E.L., A.M. Bauer, T.R. Jackman, W.R. Branch and P. Le F.N. Mouton. 2011. Between a rock and a hard polytomy: rapid radiation in the rupicolous girdled lizard (Squamata: Cordylidae). *Molecular Phylogenetics and Evolution* 58:53–70.
- Storr, G.M. 1974. Agamid Lizards of the Genera *Caimanops*, *Physignathus* and *Diporiphora* in Western Australia and Northern Territory. *Records of the Western Australian Museum* 3:121–146.
- Storr, G.M. 1981. Three new agamid lizards from Western Australia. *Records of the Western Australian Museum* 8:599–607.
- Strussman, C., and M.A. Carvalho. 2001. Two new species of *Cercolophia* Vanzolini 1992 from the state of Mato Grosso, western Brazil (Reptilia, Amphisbaenia, Amphisbaenidae). *Bollettino dei Musei di Zoologia e Anatomia comparata, Torino* 18:487–505.
- Szczerbak, N.N., and M.L. Golubev. 1996. The Gecko Fauna of the USSR and Adjacent Regions. Ithaca, USA.
- Taylor, E.H. 1922. Additions to the herpetological fauna of the Philippine Islands, I. Philippine. *Journal of Science* 21:161–206.
- Teixeria, M., Jr., R.S. Recoder, A. Camacho, M.A. de Sena, C.A. Navas and M.T. Rodrigues. 2013. A new species of *Bachia* Gray, 1845 (Squamata: Gymnophthalmidae) from the western Brazilian Amazonia. *Zootaxa* 3636:401–420.
- Thomas, R.T. 1965. Two new subspecies of *Amphisbaena* (Amphisbaenia, Reptilia) from the Barahona Peninsula of Hispaniola. *Breviora* 215:1–14.
- Thomas, R.T. 1966. Additional notes on the amphisbaenids of greater Puerto Rico. *Breviora* 249:1–23.
- Thomas, R.T., and S.B. Hedges. 1998. A new amphisbaenian from Cuba. *Journal of Herpetology* 32:92–96.
- Torres-Carvajal, O., and S. Lobos. 2014. A new species of *Alopoglossus* lizard (Squamata, Gymnophthalmidae) from the tropical Andes, with a molecular phylogeny of the genus. *ZooKeys* 410:105–120.
- Torres-Carvajal, O., R. Etheridge and K. de Queiroz. 2011. A systematic revision of Neotropical lizards in the clade *Hoplocercinae* (Squamata: Iguania). *Zootaxa* 2752:1–44.
- Trape, J. 2011. *Agama cristata* Mocquard, 1905 and *Agama insularis* Chabanaud, 1918 (Squamata, Agamidae): Two Valid West African Species. *Journal of Herpetology* 45:352–354.

- Tri, N.V., L.L. Grismer, P.H. Thai and P.I. Wood, Jr. 2014. A new species of *Hemiphyllodactylus* Bleeker, 1860 (Squamata: Gekkonidae) from Ba Na–Nui Chua Nature Reserve, Central Vietnam. *Zootaxa* 3760:539–552.
- Uzzell, T. 1959. Teiid lizards of the genus *Placosoma*. *Occasional Papers of the Museum of Zoology* 606:1–16.
- Uzzell, T. 1969. The status of the genera *Eckleopus*, *Arthroseps*, and *Aspidolaemus* (Sauria: Teiidae). *Postilla* 135:1–23.
- Vanzolini, P.E. 1978. On South American *Hemidactylus* (Sauria, Gekkonidae). *Papéis Avulsos de Zoologia* (São Paulo) 31:307–343.
- Vanzolini, P.E. 2002. An aid to the identification of the South American Species of *Amphisbaena* (Squamata, Amphisbaenidae). *Papéis Avulsos de Zoologia* (São Paulo) 42:351–362.
- Vences, M., and S. Wanke. 2004. Natural colonization or introduction? Phylogeographical relationships and morphological differentiation of house geckos (*Hemidactylus*) from Madagascar. *Biological Journal of the Linnean Society* 83:115–130
- Vences, M., J. Müller-Jung, F. Glaw and W. Böhme. 1996. Review of the *Zonosaurus aeneus* species group, with resurrection of *Zonosaurus subunicolor* (BOETTGER 1881) (Reptilia: Squamata: Gerrhosauridae). *Senckenbergiana Biologica* 76:47–59.
- Vitt, L.J., and J.P. Caldwell. 2014. *Herpetology. An Introductory Biology of Amphibians and Reptiles*. Fourth Edition. Elsevier, The Netherlands.
- Wang, Y., J. Yang and R.F Cui. 2010. A New Species of *Goniurosaurus* (Squamata: Eublepharidae) from Yingde, Guangdong Province, China. *Herpetologica* 66:229–240.
- Wang, Y., J. Yang and L. Grismer. 2013. A New Species of *Goniurosaurus* (Squamata: Eublepharidae) from Libo, Guizhou Province, China. *Herpetologica* 69:214–226.
- Wang, Y., J. Yang and L. Grismer. 2014. A New Species of *Goniurosaurus* (Squamata: Eublepharidae) from the Guizhou Province, China, Based on Molecular and Morphological Data. *Herpetologica* 70:309–322.
- Wagner, P., and W. Böhme. 2007. A new species of the genus *Trapelus* Cuvier, 1816 (Squamata: Agamidae) from arid central Africa. *Bonner Zoologische Beiträge* 55:81–87.
- Wagner, P., and A.M. Bauer. 2011. A new dwarf Agama (Sauria: Agamidae) from Ethiopia. *Breviora* 527:1–19.
- Wagner, P., D. Rodder and T. Wilms. 2012. history of *Tetradactylus ellenbergeri* (Angel, 1922) (Sauria: Gerrhosauridae) and *Trachylepis ivensii* (Bocage, 1879) (Sauria: Scincidae) in northeastern Zambia. *Bonn Zoological Bulletin* 61:35–40.

- Wagner, P., W. Böhme, A. Leaché and T. Mazuch. 2013. Additions to the lizard diversity of the Horn of Africa: Two new species in the *Agama spinosa* group. *Amphibia-Reptilia* 34:363–387.
- Werner, Y.L. 1971. Lizards and snakes from Transjordan, recently acquired by the British Museum (Natural History). *Bulletin of the British Museum (Natural History), Zoology* 21:213–256.
- Williams, K.L., P.S. Chrapliwy and H.M. Smith. 1959. A new fringe-footed lizard (*Uma*) from Mexico. *Transactions of the Kansas Academy of Science* 62:166–172.
- Wilms, T.M., M. Shobrak and P. Wagner. 2010. A new species of the genus *Tropicolotes* from Central Saudi Arabia (Reptilia: Sauria: Gekkonidae). *Bonner Zoolische Beitrage* 57:275–280.
- Wilms, T.M., W. Böhme, P. Wagner, N. Lutzmann and A. Schmitz. 2007. On the phylogeny and taxonomy of the genus *Uromastix* Merrem, 1820 (Reptilia: Squamata: Agamidae: Uromastycinae) - Resurrection of the genus *Saara* Gray, 1845. *Bonner Zoolische Beitrage* 56:55–99.
- Witten, G.J. 1993. Family Agamidae. Pp. 18–19 in *Fauna of Australia, Volume 2A, Amphibia and Reptilia* (C.J. Gasby, G.J.B. Ross and P.L. Beesley, eds.). Australian Government Publishing Service, Australia.
- Yildiz, M.Z., B. Göçmen, D. Yalçinkaya and W.I. Anatolia. 2009. New locality records for the Turkish worm lizard, *Blanus strauchi aporus* (Werner, 1898) (Sauria:Amphisbaenidae) in Southeast Anatolia, Turkey. *North-Western Journal of Zoology* 5:379–385.
- Zhao, E., K. Zhao and K.Y. Zhou. 1999. *Fauna Sinica. Reptilia Vol. 2: Squamata*. Science Press, China.
- Zhou, K.Y., Y.Z. Liu and D.J. Li. 1982. Three new species of *Gekko* and remarks on *Gekko hokouensis* (Lacertiformes, Gekkonidae). *Acta Zootaxonomica Sinica* 7:438–446.
- Ziegler, T., N.Q. Truong, A. Schmitz, R. Stenke and H. Rösler. 2008. A new species of *Goniurosaurus* from Cat Ba Island, Hai Phong, northern Vietnam (Squamata: Eublepharidae). *Zootaxa* 1771:16–30.
- Zug, G.R. 1998. Australian populations of the *Nactus pelagicus* complex (reptilia: gekkonidae). *Memoirs of the Queensland Museum* 42:613–626.
- Zug, G.R. 2013. *Reptiles and amphibians of the Pacific Islands: a comprehensive guide*. University of California Press, USA.
